# Supplementary material for: Identification of Potential Key Genes in Prostate Cancer with Gene Expression, Pivotal Pathways and Regulatory Networks Analysis Using Integrated Bioinformatics Methods
Source: MDPI journal article supplement (doi:10.3390/genes13040655), 2022-04-07
Supplement: s1 [file Supplement file S14.xlsx]

## Sheet: Sheet1
EGFR				MYC				VEGFA				PTEN
[TF]	[Target]	[Type]	[Reference]	[TF]	[Target]	[Type]	[Reference]	[TF]	[Target]	[Type]	[Reference]	[TF]	[Target]	[Type]	[Reference]
AR	EGFR	Activation	11556855;21613411	AATF	MYC	Activation	20549547	AR	VEGFA	Activation	16007189	AR	PTEN	Activation	23418309
BCL3	EGFR	Activation	17881446	AHR	MYC	Unknown	11114727;16091746	AR	VEGFA	Unknown	23369005	AR	PTEN	Unknown	20729295;21532617
BRCA1	EGFR	Repression	21396117	APC	MYC	Repression	16510874	ARNT	VEGFA	Unknown	16774940;19020709	EGR1	PTEN	Activation	17516844;20514024
CREBBP	EGFR	Unknown	21464950	AR	MYC	Unknown	24512546	ATF4	VEGFA	Activation	15788408;18829529	EGR1	PTEN	Unknown	20959484
EGR1	EGFR	Activation	11830539	BCL6	MYC	Activation	21394099	ATF4	VEGFA	Unknown	18451308;22915762;23908598	EZH2	PTEN	Unknown	22956625
ESR1	EGFR	Unknown	12421825	BDP1	MYC	Unknown	12734418	ATM	VEGFA	Repression	20676049	HES1	PTEN	Repression	18414037
HDAC1	EGFR	Repression	22025675	BIN1	MYC	Unknown	9797456	BRCA1	VEGFA	Activation	16543242	MTA1	PTEN	Repression	22700976
HDAC3	EGFR	Unknown	21464950	BRCA1	MYC	Unknown	12032322;12646176	COPS5	VEGFA	Activation	12542982	MXD1	PTEN	Repression	17998413
HOXB7	EGFR	Activation	21690342	CEBPA	MYC	Repression	12032779	DNMT1	VEGFA	Activation	17934516	NFKB1	PTEN	Activation	17334236;19940030
JUN	EGFR	Activation	10803405	CEBPE	MYC	Repression	12947005	E2F1	VEGFA	Repression	20639906	NFKB1	PTEN	Repression	19940030
JUNB	EGFR	Activation	10803405	CHD8	MYC	Unknown	16949368	E2F3	VEGFA	Unknown	21372519	PPARG	PTEN	Activation	11378386;16425225;16775433;20198337
KLF10	EGFR	Repression	22025675	CNBP	MYC	Unknown	23774591	EGR1	VEGFA	Activation	20489156	RBPJ	PTEN	Repression	17245125
LRRFIP1	EGFR	Repression	14522076	CTCF	MYC	Activation	19568426	EGR1	VEGFA	Repression	15517885	RELA	PTEN	Activation	17334236;19940030
MTA1	EGFR	Activation	11948399	CTCF	MYC	Repression	12032779;12524457	EGR1	VEGFA	Unknown	9049304	RELA	PTEN	Repression	19940030
NFKB1	EGFR	Activation	17881446	CTCF	MYC	Unknown	24725430;9591631	EP300	VEGFA	Activation	22789427	SALL4	PTEN	Repression	19440552
NR3C2	EGFR	Activation	17692454	CTNNB1	MYC	Activation	20300972;21533051	EPAS1	VEGFA	Activation	11301389;11751212;16900513;19080330	SP1	PTEN	Unknown	22030357
PGR	EGFR	Unknown	22542550	CTNNB1	MYC	Unknown	17724465;18679417;19662654;19778454	EPAS1	VEGFA	Unknown	15156561;16920734	STAT3	PTEN	Activation	22055460
PML	EGFR	Repression	12673202;9819401	DLX5	MYC	Activation	19497851	ESR1	VEGFA	Activation	19398483	TCF4	PTEN	Repression	21132538
PPARG	EGFR	Repression	15486348	E2F1	MYC	Activation	11705881	ESR1	VEGFA	Unknown	10995484;14647449	TFAP2A	PTEN	Activation	18316341
RELA	EGFR	Activation	17881446	E2F4	MYC	Unknown	17132729	ESR2	VEGFA	Unknown	10995484	TP53	PTEN	Repression	17344317
SP1	EGFR	Repression	18202149	E2F5	MYC	Unknown	17132729	FOXM1	VEGFA	Unknown	21860419	TP53	PTEN	Unknown	11545734
STAT1	EGFR	Unknown	10558875;22693070	ENO1	MYC	Repression	10681589;9119380	FOXO3	VEGFA	Unknown	21860419
STAT3	EGFR	Activation	21590492;23504318	ENO1	MYC	Unknown	10528225;10802057;18490439;20412594;7880838	FOXQ1	VEGFA	Activation	20145154
TFAP2A	EGFR	Unknown	8621697	EP300	MYC	Repression	19279113	HDAC2	VEGFA	Unknown	23926105
TP53	EGFR	Activation	10029407	ESR1	MYC	Unknown	11517191;19569049;22892083	HDAC3	VEGFA	Unknown	23926105
TSG101	EGFR	Repression	19154774	ETS2	MYC	Unknown	22108824	HDAC4	VEGFA	Repression	19509297
VDR	EGFR	Repression	16087726	EZH2	MYC	Repression	23079660	HDGF	VEGFA	Activation	14662017;21302807
WT1	EGFR	Repression	9291179	FOS	MYC	Repression	2498162	HEXIM1	VEGFA	Unknown	20453883
YBX1	EGFR	Activation	17875215;19648825	FOXA1	MYC	Unknown	24512546	HIC1	VEGFA	Repression	24067369
YY1	EGFR	Activation	22580610	FOXM1	MYC	Activation	23804320	HIF1A	VEGFA	Activation	11749701;12542982;12820439;15315159;15735682;15890092;16052307;16515634;16540671;16854277;16900513;17461470;17557905;17889387;18027712;18060642;18572865;19759417;22789427
				FUBP1	MYC	Unknown	11239393;18193062;24117486	HIF1A	VEGFA	Repression	12509854;14712484;15930297;16596228;18471962
				HDAC11	MYC	Unknown	20493879	HIF1A	VEGFA	Unknown	11486006;15156561;16543242;16774940;17486380;18835464;19238077;19502554;21731766;23060442
				HDAC2	MYC	Unknown	20493879	HIPK2	VEGFA	Repression	18644116;19046997
				HDAC3	MYC	Repression	19279113;23079660;23714368	HNF1A	VEGFA	Unknown	21731766
				HIC1	MYC	Repression	24067369	HOXB7	VEGFA	Activation	21183939
				HNF4A	MYC	Activation	23714368	HTATIP2	VEGFA	Repression	19349353
				HOXA1	MYC	Activation	15665309	ID3	VEGFA	Unknown	16926250
				IFI16	MYC	Repression	20052289	JUN	VEGFA	Repression	11731421
				JUN	MYC	Repression	2498162	KLF4	VEGFA	Unknown	23926105
				L3MBTL1	MYC	Unknown	23543057	MEF2C	VEGFA	Unknown	18450586
				LEF1	MYC	Unknown	19620402	MYC	VEGFA	Activation	19398483
				MAX	MYC	Unknown	9797456	MYC	VEGFA	Unknown	18809243
				MTA1	MYC	Unknown	12431981	NFKB1	VEGFA	Activation	15856023;16684540;17407600;18056465
				MXI1	MYC	Repression	8838813	NFKB1	VEGFA	Repression	15517885
				MYB	MYC	Activation	1594249	NFKB1	VEGFA	Unknown	12160329;17673602;18184402;20103608;20538607
				MYB	MYC	Unknown	11259163;16088151;19609274	NKX3-1	VEGFA	Unknown	18974119
				MYBL2	MYC	Activation	1594249	NR1H4	VEGFA	Activation	21364590
				NF1	MYC	Activation	9562250	PGR	VEGFA	Unknown	22542550
				NFKB1	MYC	Activation	17018379	PTTG1	VEGFA	Activation	12213878;16926250
				NFKB1	MYC	Repression	18566231	RB1	VEGFA	Activation	16007189
				NFKB1	MYC	Unknown	11114727;12894581;17673602;17944672;18184402;19469019;19766095;21790895	RELA	VEGFA	Activation	15856023;16684540;17407600;18056465
				PGR	MYC	Unknown	22892083	RELA	VEGFA	Repression	15517885
				PPARG	MYC	Repression	11973610	RELA	VEGFA	Unknown	12160329;17673602;18184402;20103608;20538607
				PRDM1	MYC	Repression	10713181;12032779	RUNX1	VEGFA	Repression	21447743
				PTTG1	MYC	Activation	22475756	RUNX2	VEGFA	Activation	19509297;22641097
				PTTG1	MYC	Unknown	11115508	SMAD3	VEGFA	Unknown	11486006
				RB1	MYC	Repression	10200487;9671466	SP1	VEGFA	Activation	10581162;12429844;15217947;15342781;16540671;16982770;21115498
				RB1	MYC	Unknown	7680889	SP1	VEGFA	Repression	11559575
				RBL1	MYC	Unknown	17132729;9797456	SP1	VEGFA	Unknown	10816575;11731421;12560084;14647449;18575762;23369005;8910439
				RELA	MYC	Activation	17018379	SP3	VEGFA	Unknown	10816575;14647449
				RELA	MYC	Repression	18566231	STAT3	VEGFA	Unknown	23104276
				RELA	MYC	Unknown	11114727;12894581;17673602;17944672;18184402;19469019;19766095;21790895	STAT3	VEGFA	Activation	11960372;15735682;17169602;17533737;19284568;19880237;21278793;21418908
				RFX1	MYC	Repression	10918054;12032779	STAT3	VEGFA	Repression	17533737;19880237;22313388
				RUNX3	MYC	Repression	20442291	STAT3	VEGFA	Unknown	12824281;16540670;16899623;17937859;18184402;18320073;19020709;20043094;21172343;21344490;21731766;25101566
				SIRT1	MYC	Repression	22245592;22483777	TCF4	VEGFA	Activation	15940626
				SMAD3	MYC	Unknown	17132729	TEAD4	VEGFA	Repression	22761647
				SMAD4	MYC	Unknown	17132729	TFAP2A	VEGFA	Activation	9049304
				SMAD7	MYC	Activation	15555279	TFAP2A	VEGFA	Unknown	11731421
				SNIP1	MYC	Unknown	17157259	TP53	VEGFA	Activation	16684540
				SP1	MYC	Unknown	2057364;8355712	TP53	VEGFA	Repression	11559575
				SRSF1	MYC	Unknown	22545246	TRAF6	VEGFA	Repression	22326918
				STAT3	MYC	Activation	15184887;17204573;19259613	UHRF1	VEGFA	Unknown	17934516
				STAT3	MYC	Repression	20067773;22317895	VHL	VEGFA	Activation	10804089;7533661;8625303
				STAT3	MYC	Unknown	10464281;15469392;18184402;20654581	VHL	VEGFA	Repression	10581162;12539169;12912922;8855222;9370235
				STAT4	MYC	Activation	10702306	VHL	VEGFA	Unknown	10189987;19801654;9572397;9689663
				TBL1X	MYC	Unknown	20493879	WT1	VEGFA	Activation	20871039
				TBP	MYC	Unknown	7880838;9797456	WT1	VEGFA	Unknown	16572586;17127464
				TCF3	MYC	Activation	22384858	XBP1	VEGFA	Unknown	20824063
				TCF3	MYC	Repression	21788410	ZFP36	VEGFA	Repression	21507959;21656745
				TCF4	MYC	Activation	21533051	ZFP36L1	VEGFA	Repression	19801654
				TCF4	MYC	Unknown	15928669;19561604;19662654;19778454	ZNF24	VEGFA	Repression	20510677;23212515
				TLX1	MYC	Activation	20618946
				TP53	MYC	Repression	19411072
				TP53	MYC	Unknown	19202062
				WDR5	MYC	Unknown	24782528
				WT1	MYC	Repression	17634147
				WT1	MYC	Unknown	15286719
				YY1	MYC	Activation	18490439
				YY1	MYC	Repression	19279113
				YY1	MYC	Unknown	10528225;17434929;9797456
				ZBTB7A	MYC	Repression	17189472
				ZNF300	MYC	Activation	21777376
				ZNF382	MYC	Repression	20682794

## Sheet: Sheet2
MYC as a Transcription Factor and it's target				Other TFs that share targets with MYC
[TF]	[Target]	[Type]	[Reference]	[TF]	[# of overlapped target genes]	[P value]	[FDR]
MYC	ASS1	Activation	19934275	TP53	24	4.15604e-25	3.65517e-27
MYC	ATF3	Unknown	21384303	MYCN	14	9.16856e-19	1.53712e-20
MYC	AXIN2	Unknown	24299953	E2F1	18	9.19785e-18	1.63051e-19
MYC	BAG2	Unknown	22146591	SP1	27	1.65633e-17	2.98171e-19
MYC	BCL2	Unknown	18809243	RELA	23	1.77308e-17	3.24062e-19
MYC	BMI1	Activation	21856782	NFKB1	22	2.673e-16	5.84041e-18
MYC	BRD7	Repression	19111069	IRF1	12	4.94758e-15	1.2646e-16
MYC	CAD	Unknown	10931841;17706770	ATM	9	2.00705e-13	6.23324e-15
MYC	CBFB	Unknown	9064279	SIRT1	11	4.17603e-13	1.38302e-14
MYC	CCNA2	Unknown	7608142	HIVEP2	6	9.23803e-13	3.23718e-14
MYC	CCNB1	Unknown	11522645	STAT3	14	5.35599e-12	2.20069e-13
MYC	CCND1	Repression	14757441;8196642	EGR1	11	8.50576e-11	4.60529e-12
MYC	CCND1	Unknown	17881732;18809243;19698176;21933022	YY1	11	1.47995e-10	8.37899e-12
MYC	CCND2	Activation	9339900	CIITA	8	1.56913e-10	8.97016e-12
MYC	CCND2	Unknown	21790895	ESR1	10	3.50461e-10	2.16239e-11
MYC	CCNE1	Activation	20607601	SOX6	5	5.42851e-10	3.50612e-11
MYC	PROM1	Unknown	22945648	KLF4	8	7.61386e-10	5.07451e-11
MYC	CD33	Repression	19259613	JUN	12	1.36365e-09	9.7256e-11
MYC	CD38	Activation	11519042	EP300	9	1.49152e-09	1.08426e-10
MYC	CDC25C	Activation	22446629	DNMT1	7	4.99869e-09	4.14898e-10
MYC	CDC34	Activation	21252116	HDAC1	9	9.11732e-09	8.45705e-10
MYC	CDCA7	Unknown	16580749	WT1	8	1.27657e-08	1.25078e-09
MYC	CDH3	Unknown	19882246	PAX5	6	1.62102e-08	1.63728e-09
MYC	CDK2	Unknown	21384303	BRCA1	8	1.64159e-08	1.66257e-09
MYC	CDK4	Activation	22395148	EZH2	7	3.06578e-08	3.38301e-09
MYC	CDK4	Unknown	10688915;21384303	PPARG	8	5.08721e-08	5.97714e-09
MYC	CDK6	Activation	22395148	MAX	4	1.17007e-07	1.56771e-08
MYC	CDKN1A	Activation	16738884	RB1	6	1.52731e-07	2.11981e-08
MYC	CDKN1A	Repression	12553001;19150257;21042278;22371483;23804320	HIF1A	8	2.35657e-07	3.49769e-08
MYC	CDKN1A	Unknown	15757889;17885207	HOXA1	4	2.43572e-07	3.6417e-08
MYC	CEBPA	Repression	19259613	VHL	5	5.07502e-07	8.49441e-08
MYC	CEBPA	Unknown	15867211	ABL1	4	1.13196e-06	2.15597e-07
MYC	CFLAR	Repression	20348907	FLI1	5	1.45068e-06	2.84474e-07
MYC	CHEK1	Activation	23269272	NANOG	5	1.45068e-06	2.84474e-07
MYC	CHEK2	Activation	23269272	BCL6	5	2.42427e-06	5.19013e-07
MYC	CREBBP	Unknown	12776737	KAT2B	4	4.24147e-06	1.00951e-06
MYC	CXCR4	Activation	10229837	SMAD3	5	4.3714e-06	1.04409e-06
MYC	CYP3A4	Unknown	14575816	E2F3	4	5.45273e-06	1.37049e-06
MYC	DDX18	Unknown	8861962	ING4	4	5.45273e-06	1.37049e-06
MYC	DKK1	Repression	20697356	TBP	4	6.91293e-06	1.81919e-06
MYC	DKK1	Unknown	17964517	NUPR1	3	7.04105e-06	1.86065e-06
MYC	EBNA1BP2	Activation	22169551	TWIST1	5	7.24312e-06	1.91902e-06
MYC	EP300	Unknown	12776737	AR	7	7.73314e-06	2.0818e-06
MYC	FASLG	Activation	12655294	DDIT3	4	8.58297e-06	2.36837e-06
MYC	FASLG	Unknown	10734130;14563113	NR3C1	5	9.01993e-06	2.5317e-06
MYC	FMR1	Unknown	9328468	FOXM1	4	1.05211e-05	3.03151e-06
MYC	FOXM1	Activation	20658516	FOXO3	4	1.05211e-05	3.03151e-06
MYC	FTH1P18	Repression	16466700	ZBTB16	3	1.24669e-05	3.70562e-06
MYC	FUT3	Activation	22547830	GLI1	4	1.27285e-05	3.82284e-06
MYC	GATA1	Repression	18838534	KLF5	4	1.52171e-05	4.75731e-06
MYC	GATA4	Activation	23239811	KLF6	4	1.52171e-05	4.75731e-06
MYC	HDAC2	Activation	20697349	PML	4	1.52171e-05	4.75731e-06
MYC	HLA-A	Activation	8206526	HDAC9	4	2.12749e-05	7.11893e-06
MYC	HLA-B	Activation	8206526	ERCC2	3	2.89295e-05	1.02885e-05
MYC	HLA-C	Activation	8206526	ING1	3	2.89295e-05	1.02885e-05
MYC	HLA-E	Activation	8206526	SMARCA4	3	3.97836e-05	1.53678e-05
MYC	HLA-F	Activation	8206526	CEBPA	5	4.16291e-05	1.62294e-05
MYC	HLA-G	Activation	8206526	ETS1	6	4.19987e-05	1.64205e-05
MYC	HNRNPA1	Activation	20010808	HDAC2	4	4.79986e-05	1.94012e-05
MYC	HNRNPA2B1	Activation	20010808	HIPK2	3	5.30114e-05	2.18616e-05
MYC	HSPA4	Unknown	1562593	TFDP1	3	5.30114e-05	2.18616e-05
MYC	ID2	Unknown	12545167	CREBBP	4	6.07846e-05	2.57377e-05
MYC	IER3	Unknown	12360408	DNMT3A	3	6.81553e-05	2.99333e-05
MYC	IFNA1	Repression	16270532	ATF2	4	8.33193e-05	3.79213e-05
MYC	IGF2BP1	Activation	21252116	HSF1	4	8.33193e-05	3.79213e-05
MYC	IGK	Activation	11795942	JUND	4	9.09878e-05	4.27869e-05
MYC	IL6	Unknown	19259613	TP73	3	0.000104201	5.14488e-05
MYC	IPO7	Activation	22284678	ATF4	4	0.000129758	6.69027e-05
MYC	JUNB	Repression	18838534	MYB	4	0.000141569	7.42184e-05
MYC	KRAS	Activation	21252116	NRF1	3	0.000180601	9.94738e-05
MYC	LDHA	Activation	9723176	PTTG1	3	0.000210762	0.000120282
MYC	MAPK1	Unknown	21933022	CREB1	5	0.000300177	0.000183996
MYC	MME	Activation	11519042	ESR2	3	0.000321427	0.00019912
MYC	MST1	Repression	24499724	STAT1	5	0.000326593	0.000203756
MYC	MTDH	Unknown	17088530	ARNT	3	0.00040706	0.000266733
MYC	NDRG1	Repression	11936845	REL	3	0.00040706	0.000266733
MYC	NDRG1	Unknown	21976667	AHR	3	0.000458973	0.000305456
MYC	NFE2	Repression	18838534	FHL2	2	0.000486112	0.000327058
MYC	NOL7	Activation	20206243	ID2	2	0.000486112	0.000327058
MYC	ODC1	Activation	21874531;8262968	TSC22D3	2	0.000486112	0.000327058
MYC	ODC1	Unknown	19789310	UHRF1	2	0.000486112	0.000327058
MYC	PCNA	Unknown	18809243	ZNF24	2	0.000486112	0.000327058
MYC	PGK1	Unknown	18809243	ZNF300	2	0.000486112	0.000327058
MYC	PMAIP1	Activation	22216287	GATA1	4	0.000544038	0.000375825
MYC	PRDX3	Activation	12011429	E2F4	3	0.000566402	0.000393376
MYC	PRODH	Repression	22615405	HDAC3	3	0.000625468	0.000442822
MYC	PTBP1	Activation	20010808	POU5F1	3	0.000625468	0.000442822
MYC	RCC1	Unknown	9178906	MYOD1	2	0.000679232	0.000488735
MYC	SART3	Unknown	21447833	MYOG	2	0.000679232	0.000488735
MYC	SFRP1	Repression	20697356	RELB	2	0.000679232	0.000488735
MYC	SHMT1	Unknown	12138190	SMAD2	2	0.000679232	0.000488735
MYC	SRSF1	Activation	22545246	SMAD4	3	0.000686707	0.000496086
MYC	ST3GAL1	Activation	22547830	TCF4	3	0.000686707	0.000496086
MYC	ST3GAL3	Activation	22547830	PARP1	3	0.000752013	0.000553288
MYC	ST3GAL4	Activation	22547830	PGR	3	0.000752013	0.000553288
MYC	SURF1	Activation	10858544	USF1	4	0.000778991	0.00057699
MYC	SURF2	Activation	10858544	RUNX3	3	0.000893808	0.000679967
MYC	TERT	Activation	10022128;15595642;18226852;18754863;21132266;22207128	AATF	2	0.000895368	0.000681646
MYC	TERT	Unknown	10637317;12941894;14611815;15958520;17706770;18093727;19912441;21553143;24705139	NFKB2	2	0.000895368	0.000681646
MYC	TFAM	Unknown	15988031	TFAP2A	4	0.000982396	0.000760861
MYC	TFAP4	Activation	19270520	CEBPE	2	0.00113777	0.000905432
MYC	TFRC	Activation	16466700	IRF9	2	0.00113777	0.000905432
MYC	TLX1	Unknown	20618946	ETS2	3	0.00132147	0.00107341
MYC	TNFRSF10B	Activation	15144957	HOXA9	2	0.00140915	0.00115974
MYC	TOP1MT	Unknown	21531700	SP4	2	0.00140915	0.00115974
MYC	TP53	Activation	8494784	EGR2	2	0.0017172	0.0014442
MYC	TP53	Unknown	19086036	HOXB7	2	0.0017172	0.0014442
MYC	TP73	Activation	11115495	NKX3-1	2	0.0017172	0.0014442
MYC	UBE2C	Activation	22170434	TAL1	2	0.0017172	0.0014442
MYC	VEGFA	Activation	19398483	ZFP36	2	0.0017172	0.0014442
MYC	VEGFA	Unknown	18809243	KLF2	2	0.00204707	0.00175849
MYC	WRN	Activation	12842909	MSC	2	0.00204707	0.00175849
MYC	XPO1	Activation	22284678	NFATC2	2	0.00204707	0.00175849
				NPM1	2	0.00204707	0.00175849
				OTX2	2	0.0024061	0.00210224
				USF2	3	0.00316167	0.00284972
				VDR	3	0.00316167	0.00284972
				STAT5A	2	0.00319069	0.00287676
				HOXA10	2	0.003617	0.00330685
				NR4A1	2	0.003617	0.00330685
				SATB1	2	0.003617	0.00330685
				TCF3	2	0.003617	0.00330685
				TP63	2	0.003617	0.00330685
				PITX1	2	0.00408396	0.00376504
				SP3	4	0.00505812	0.00474116
				GLI2	2	0.00507995	0.00476442
				HMGA1	2	0.00507995	0.00476442
				SPI1	3	0.00611951	0.00579407
				ELK1	2	0.0061949	0.00587226
				GATA2	2	0.0061949	0.00587226
				RXRA	2	0.0061949	0.00587226
				XBP1	2	0.0061949	0.00587226
				CEBPB	3	0.006379	0.00605378
				ATF3	2	0.00740764	0.00708597
				CTNNB1	2	0.00802966	0.00773173
				ATF1	2	0.00869702	0.00840302
				ETV4	2	0.00869702	0.00840302
				HDAC4	2	0.00869702	0.00840302
				SOX2	2	0.0093925	0.00909951
				SOX9	2	0.0093925	0.00909951
				TWIST2	2	0.0093925	0.00909951
				CREM	2	0.0100999	0.0098209
				FOXO1	2	0.0100999	0.0098209
				NR1I2	2	0.0100999	0.0098209
				YBX1	2	0.0140475	0.0137907
				CDX2	2	0.0157965	0.0155425
				CTCF	2	0.0166932	0.0164523
				LEF1	2	0.0195288	0.0193141
				POU2F1	2	0.0205284	0.0203112
				RUNX1	2	0.0236197	0.0234282
				GATA3	2	0.0246982	0.0245082
				HNF4A	2	0.0292026	0.029026
				PPARA	2	0.030379	0.0302036
				FOS	2	0.0430954	0.042971
