# Supplementary material for: Identification of Potential Key Genes in Prostate Cancer with Gene Expression, Pivotal Pathways and Regulatory Networks Analysis Using Integrated Bioinformatics Methods
Source: MDPI journal article supplement (doi:10.3390/genes13040655), 2022-04-07
Supplement: s1 [file Supplementary file S 15.xlsx]

## Sheet: Sheet1
TF name:AR
miRNA name	TSS	Binding site	Action type	SRAID/PMID	Evidence	Tissue	Species
hsa-let-7a-2	chr11: 122156371(NR_137188)	chr11: 122156421-122156593(score=751)	Regulation	SRX433201	level 1	Prostate	H.sapiens
hsa-let-7a-2	chr11: 122156371(NR_137194)	chr11: 122156421-122156593(score=751)	Regulation	SRX433201	level 1	Prostate	H.sapiens
hsa-let-7a-2	chr11: 122157113(NR_137186)	chr11: 122156421-122156593(score=751)	Regulation	SRX433201	level 1	Prostate	H.sapiens
hsa-let-7a-2	chr11: 122157113(NR_137187)	chr11: 122156421-122156593(score=751)	Regulation	SRX433201	level 1	Prostate	H.sapiens
hsa-let-7a-2	chr11: 122203109(NR_024430)	chr11: 122203270-122203672(score=1000)	Regulation	SRX433201	level 1	Prostate	H.sapiens
hsa-let-7a-2	chr11: 122203109(NR_024430)	chr11: 122203290-122203671(score=735)	Regulation	SRX433198	level 1	Prostate	H.sapiens
hsa-let-7a-2	chr11: 122203109(NR_024430)	chr11: 122203334-122203664(score=546)	Regulation	SRX433197	level 1	Prostate	H.sapiens
hsa-let-7a-2	chr11: 122203109(NR_024430)	chr11: 122203383-122203683(score=815)	Regulation	SRX433202	level 1	Prostate	H.sapiens
hsa-let-7a-2	chr11: 122203109(NR_137181)	chr11: 122203270-122203672(score=1000)	Regulation	SRX433201	level 1	Prostate	H.sapiens
hsa-let-7a-2	chr11: 122203109(NR_137181)	chr11: 122203290-122203671(score=735)	Regulation	SRX433198	level 1	Prostate	H.sapiens
hsa-let-7a-2	chr11: 122203109(NR_137181)	chr11: 122203334-122203664(score=546)	Regulation	SRX433197	level 1	Prostate	H.sapiens
hsa-let-7a-2	chr11: 122203109(NR_137181)	chr11: 122203383-122203683(score=815)	Regulation	SRX433202	level 1	Prostate	H.sapiens
hsa-let-7a-2	chr11: 122203109(NR_137182)	chr11: 122203270-122203672(score=1000)	Regulation	SRX433201	level 1	Prostate	H.sapiens
hsa-let-7a-2	chr11: 122203109(NR_137182)	chr11: 122203290-122203671(score=735)	Regulation	SRX433198	level 1	Prostate	H.sapiens
hsa-let-7a-2	chr11: 122203109(NR_137182)	chr11: 122203334-122203664(score=546)	Regulation	SRX433197	level 1	Prostate	H.sapiens
hsa-let-7a-2	chr11: 122203109(NR_137182)	chr11: 122203383-122203683(score=815)	Regulation	SRX433202	level 1	Prostate	H.sapiens
hsa-let-7a-3	chr22: 46112749	chr22: 46111886-46112120(score=497)	Regulation	SRX433202	level 1	Prostate	H.sapiens
hsa-let-7a-3	chr22: 46112749	chr22: 46111887-46112093(score=972)	Regulation	SRX433201	level 1	Prostate	H.sapiens
hsa-let-7b	chr22: 46112749	chr22: 46111886-46112120(score=497)	Regulation	SRX433202	level 1	Prostate	H.sapiens
hsa-let-7b	chr22: 46112749	chr22: 46111887-46112093(score=972)	Regulation	SRX433201	level 1	Prostate	H.sapiens
hsa-let-7c	chr21: 16419402	chr21: 16419189-16419464(score=643)	Regulation	SRX734410	level 2	Prostate	H.sapiens
hsa-let-7c	chr21: 16419402	chr21: 16419194-16419405(score=579)	Regulation	SRX734411	level 2	Prostate	H.sapiens
hsa-let-7c	chr21: 16419402	chr21: 16419208-16419408(score=415)	Regulation	SRX734412	level 2	Prostate	H.sapiens
hsa-let-7c	chr21: 16419402	chr21: 16419217-16419392(score=392)	Regulation	SRX734409	level 2	Prostate	H.sapiens
hsa-let-7c	chr21: 16181398(NR_136551)	chr21: 16177024-16177308(score=1000)	Regulation	SRX471208	level 1	Prostate	H.sapiens
hsa-let-7c	chr21: 16181398(NR_136551)	chr21: 16177029-16177287(score=1000)	Regulation	SRX667982	level 1	Prostate	H.sapiens
hsa-let-7c	chr21: 16181398(NR_136551)	chr21: 16177032-16177288(score=1000)	Regulation	SRX667983	level 1	Prostate	H.sapiens
hsa-let-7c	chr21: 16181398(NR_136551)	chr21: 16177034-16177311(score=1000)	Regulation	SRX383815	level 1	Prostate	H.sapiens
hsa-let-7c	chr21: 16181398(NR_136551)	chr21: 16177037-16177294(score=1000)	Regulation	SRX1885174	level 1	Prostate	H.sapiens
hsa-let-7c	chr21: 16181398(NR_136551)	chr21: 16177040-16177269(score=668)	Regulation	SRX736065	level 1	Prostate	H.sapiens
hsa-let-7c	chr21: 16181398(NR_136551)	chr21: 16177040-16177287(score=1000)	Regulation	SRX1885175	level 1	Prostate	H.sapiens
hsa-let-7c	chr21: 16181398(NR_136551)	chr21: 16177041-16177277(score=1000)	Regulation	SRX059704	level 1	Prostate	H.sapiens
hsa-let-7c	chr21: 16181398(NR_136551)	chr21: 16177048-16177300(score=454)	Regulation	SRX1818075	level 1	Prostate	H.sapiens
hsa-let-7c	chr21: 16181398(NR_136551)	chr21: 16177049-16177284(score=729)	Regulation	SRX847035	level 1	Prostate	H.sapiens
hsa-let-7c	chr21: 16181398(NR_136551)	chr21: 16177050-16177286(score=1000)	Regulation	SRX1885173	level 1	Prostate	H.sapiens
hsa-let-7c	chr21: 16181398(NR_136551)	chr21: 16177051-16177291(score=1000)	Regulation	SRX1885176	level 1	Prostate	H.sapiens
hsa-let-7c	chr21: 16181398(NR_136551)	chr21: 16177059-16177270(score=829)	Regulation	SRX1334492	level 1	Prostate	H.sapiens
hsa-let-7c	chr21: 16181398(NR_136551)	chr21: 16177059-16177288(score=612)	Regulation	SRX1818077	level 1	Prostate	H.sapiens
hsa-let-7c	chr21: 16181398(NR_136551)	chr21: 16177069-16177325(score=952)	Regulation	SRX2017926	level 1	Prostate	H.sapiens
hsa-let-7c	chr21: 16181398(NR_136551)	chr21: 16177074-16177275(score=806)	Regulation	SRX1334494	level 1	Prostate	H.sapiens
hsa-let-7c	chr21: 16181398(NR_136551)	chr21: 16177077-16177239(score=917)	Regulation	SRX497604	level 1	Prostate	H.sapiens
hsa-let-7c	chr21: 16181398(NR_136551)	chr21: 16177081-16177260(score=465)	Regulation	SRX220080	level 1	Prostate	H.sapiens
hsa-let-7c	chr21: 16181398(NR_136551)	chr21: 16177082-16177301(score=365)	Regulation	SRX847034	level 1	Prostate	H.sapiens
hsa-let-7c	chr21: 16181398(NR_136551)	chr21: 16177086-16177269(score=316)	Regulation	SRX736066	level 1	Prostate	H.sapiens
hsa-let-7c	chr21: 16181398(NR_136551)	chr21: 16177088-16177220(score=492)	Regulation	SRX101130	level 1	Prostate	H.sapiens
hsa-let-7c	chr21: 16181398(NR_136551)	chr21: 16177093-16177214(score=518)	Regulation	SRX1334493	level 1	Prostate	H.sapiens
hsa-let-7c	chr21: 16181398(NR_136551)	chr21: 16177102-16177224(score=458)	Regulation	SRX1033275	level 1	Prostate	H.sapiens
hsa-let-7c	chr21: 16181398(NR_136551)	chr21: 16177109-16177255(score=397)	Regulation	SRX220079	level 1	Prostate	H.sapiens
hsa-let-7c	chr21: 16181398(NR_136551)	chr21: 16177114-16177270(score=451)	Regulation	SRX173202	level 1	Prostate	H.sapiens
hsa-let-7c	chr21: 16181398(NR_136551)	chr21: 16177126-16177278(score=372)	Regulation	SRX2017927	level 1	Prostate	H.sapiens
hsa-let-7c	chr21: 16181398(NR_136551)	chr21: 16177128-16177250(score=412)	Regulation	SRX1334491	level 1	Prostate	H.sapiens
hsa-let-7c	chr21: 16181398(NR_136551)	chr21: 16179804-16180050(score=726)	Regulation	SRX734410	level 1	Prostate	H.sapiens
hsa-let-7c	chr21: 16181398(NR_136551)	chr21: 16179814-16180026(score=577)	Regulation	SRX734411	level 1	Prostate	H.sapiens
hsa-let-7c	chr21: 16181398(NR_136551)	chr21: 16179833-16180027(score=426)	Regulation	SRX734412	level 1	Prostate	H.sapiens
hsa-let-7c	chr21: 16181398(NR_136551)	chr21: 16179838-16180004(score=492)	Regulation	SRX173202	level 1	Prostate	H.sapiens
hsa-let-7c	chr21: 16181398(NR_136551)	chr21: 16179843-16179979(score=431)	Regulation	SRX101132	level 1	Prostate	H.sapiens
hsa-let-7c	chr21: 16181398(NR_136551)	chr21: 16179851-16180013(score=404)	Regulation	SRX734409	level 1	Prostate	H.sapiens
hsa-let-7c	chr21: 16181398(NR_136551)	chr21: 16179857-16179979(score=508)	Regulation	SRX101130	level 1	Prostate	H.sapiens
hsa-let-7c	chr21: 16181398(NR_136552)	chr21: 16177024-16177308(score=1000)	Regulation	SRX471208	level 1	Prostate	H.sapiens
hsa-let-7c	chr21: 16181398(NR_136552)	chr21: 16177029-16177287(score=1000)	Regulation	SRX667982	level 1	Prostate	H.sapiens
hsa-let-7c	chr21: 16181398(NR_136552)	chr21: 16177032-16177288(score=1000)	Regulation	SRX667983	level 1	Prostate	H.sapiens
hsa-let-7c	chr21: 16181398(NR_136552)	chr21: 16177034-16177311(score=1000)	Regulation	SRX383815	level 1	Prostate	H.sapiens
hsa-let-7c	chr21: 16181398(NR_136552)	chr21: 16177037-16177294(score=1000)	Regulation	SRX1885174	level 1	Prostate	H.sapiens
hsa-let-7c	chr21: 16181398(NR_136552)	chr21: 16177040-16177269(score=668)	Regulation	SRX736065	level 1	Prostate	H.sapiens
hsa-let-7c	chr21: 16181398(NR_136552)	chr21: 16177040-16177287(score=1000)	Regulation	SRX1885175	level 1	Prostate	H.sapiens
hsa-let-7c	chr21: 16181398(NR_136552)	chr21: 16177041-16177277(score=1000)	Regulation	SRX059704	level 1	Prostate	H.sapiens
hsa-let-7c	chr21: 16181398(NR_136552)	chr21: 16177048-16177300(score=454)	Regulation	SRX1818075	level 1	Prostate	H.sapiens
hsa-let-7c	chr21: 16181398(NR_136552)	chr21: 16177049-16177284(score=729)	Regulation	SRX847035	level 1	Prostate	H.sapiens
hsa-let-7c	chr21: 16181398(NR_136552)	chr21: 16177050-16177286(score=1000)	Regulation	SRX1885173	level 1	Prostate	H.sapiens
hsa-let-7c	chr21: 16181398(NR_136552)	chr21: 16177051-16177291(score=1000)	Regulation	SRX1885176	level 1	Prostate	H.sapiens
hsa-let-7c	chr21: 16181398(NR_136552)	chr21: 16177059-16177270(score=829)	Regulation	SRX1334492	level 1	Prostate	H.sapiens
hsa-let-7c	chr21: 16181398(NR_136552)	chr21: 16177059-16177288(score=612)	Regulation	SRX1818077	level 1	Prostate	H.sapiens
hsa-let-7c	chr21: 16181398(NR_136552)	chr21: 16177069-16177325(score=952)	Regulation	SRX2017926	level 1	Prostate	H.sapiens
hsa-let-7c	chr21: 16181398(NR_136552)	chr21: 16177074-16177275(score=806)	Regulation	SRX1334494	level 1	Prostate	H.sapiens
hsa-let-7c	chr21: 16181398(NR_136552)	chr21: 16177077-16177239(score=917)	Regulation	SRX497604	level 1	Prostate	H.sapiens
hsa-let-7c	chr21: 16181398(NR_136552)	chr21: 16177081-16177260(score=465)	Regulation	SRX220080	level 1	Prostate	H.sapiens
hsa-let-7c	chr21: 16181398(NR_136552)	chr21: 16177082-16177301(score=365)	Regulation	SRX847034	level 1	Prostate	H.sapiens
hsa-let-7c	chr21: 16181398(NR_136552)	chr21: 16177086-16177269(score=316)	Regulation	SRX736066	level 1	Prostate	H.sapiens
hsa-let-7c	chr21: 16181398(NR_136552)	chr21: 16177088-16177220(score=492)	Regulation	SRX101130	level 1	Prostate	H.sapiens
hsa-let-7c	chr21: 16181398(NR_136552)	chr21: 16177093-16177214(score=518)	Regulation	SRX1334493	level 1	Prostate	H.sapiens
hsa-let-7c	chr21: 16181398(NR_136552)	chr21: 16177102-16177224(score=458)	Regulation	SRX1033275	level 1	Prostate	H.sapiens
hsa-let-7c	chr21: 16181398(NR_136552)	chr21: 16177109-16177255(score=397)	Regulation	SRX220079	level 1	Prostate	H.sapiens
hsa-let-7c	chr21: 16181398(NR_136552)	chr21: 16177114-16177270(score=451)	Regulation	SRX173202	level 1	Prostate	H.sapiens
hsa-let-7c	chr21: 16181398(NR_136552)	chr21: 16177126-16177278(score=372)	Regulation	SRX2017927	level 1	Prostate	H.sapiens
hsa-let-7c	chr21: 16181398(NR_136552)	chr21: 16177128-16177250(score=412)	Regulation	SRX1334491	level 1	Prostate	H.sapiens
hsa-let-7c	chr21: 16181398(NR_136552)	chr21: 16179804-16180050(score=726)	Regulation	SRX734410	level 1	Prostate	H.sapiens
hsa-let-7c	chr21: 16181398(NR_136552)	chr21: 16179814-16180026(score=577)	Regulation	SRX734411	level 1	Prostate	H.sapiens
hsa-let-7c	chr21: 16181398(NR_136552)	chr21: 16179833-16180027(score=426)	Regulation	SRX734412	level 1	Prostate	H.sapiens
hsa-let-7c	chr21: 16181398(NR_136552)	chr21: 16179838-16180004(score=492)	Regulation	SRX173202	level 1	Prostate	H.sapiens
hsa-let-7c	chr21: 16181398(NR_136552)	chr21: 16179843-16179979(score=431)	Regulation	SRX101132	level 1	Prostate	H.sapiens
hsa-let-7c	chr21: 16181398(NR_136552)	chr21: 16179851-16180013(score=404)	Regulation	SRX734409	level 1	Prostate	H.sapiens
hsa-let-7c	chr21: 16181398(NR_136552)	chr21: 16179857-16179979(score=508)	Regulation	SRX101130	level 1	Prostate	H.sapiens
hsa-let-7c	chr21: 16419203(NR_136544)	chr21: 16419657-16420013(score=1000)	Regulation	SRX734410	level 1	Prostate	H.sapiens
hsa-let-7c	chr21: 16419203(NR_136544)	chr21: 16419660-16419952(score=309)	Regulation	SRX595676	level 1	Prostate	H.sapiens
hsa-let-7c	chr21: 16419203(NR_136544)	chr21: 16419711-16419943(score=1000)	Regulation	SRX173202	level 1	Prostate	H.sapiens
hsa-let-7c	chr21: 16419203(NR_136544)	chr21: 16419711-16419956(score=857)	Regulation	SRX734412	level 1	Prostate	H.sapiens
hsa-let-7c	chr21: 16419203(NR_136544)	chr21: 16419718-16419942(score=1000)	Regulation	SRX734411	level 1	Prostate	H.sapiens
hsa-let-7c	chr21: 16419203(NR_136544)	chr21: 16419726-16419973(score=900)	Regulation	SRX471208	level 1	Prostate	H.sapiens
hsa-let-7c	chr21: 16419203(NR_136544)	chr21: 16419730-16419938(score=453)	Regulation	SRX471850	level 1	Prostate	H.sapiens
hsa-let-7c	chr21: 16419203(NR_136544)	chr21: 16419731-16419975(score=906)	Regulation	SRX059704	level 1	Prostate	H.sapiens
hsa-let-7c	chr21: 16419203(NR_136544)	chr21: 16419733-16420041(score=296)	Regulation	SRX1569768	level 1	Prostate	H.sapiens
hsa-let-7c	chr21: 16419203(NR_136544)	chr21: 16419738-16419949(score=643)	Regulation	SRX734409	level 1	Prostate	H.sapiens
hsa-let-7c	chr21: 16419203(NR_136544)	chr21: 16419741-16419876(score=338)	Regulation	SRX736065	level 1	Prostate	H.sapiens
hsa-let-7c	chr21: 16419203(NR_136544)	chr21: 16419746-16419943(score=654)	Regulation	SRX2017926	level 1	Prostate	H.sapiens
hsa-let-7c	chr21: 16419203(NR_136544)	chr21: 16419754-16419938(score=506)	Regulation	SRX847035	level 1	Prostate	H.sapiens
hsa-let-7c	chr21: 16419203(NR_136544)	chr21: 16419760-16419943(score=755)	Regulation	SRX383815	level 1	Prostate	H.sapiens
hsa-let-7c	chr21: 16419203(NR_136544)	chr21: 16419766-16419952(score=442)	Regulation	SRX471849	level 1	Prostate	H.sapiens
hsa-let-7c	chr21: 16419203(NR_136544)	chr21: 16419773-16419886(score=515)	Regulation	SRX173201	level 1	Prostate	H.sapiens
hsa-let-7c	chr21: 16419203(NR_136544)	chr21: 16419775-16419929(score=700)	Regulation	SRX101130	level 1	Prostate	H.sapiens
hsa-let-7c	chr21: 16419203(NR_136544)	chr21: 16419777-16419914(score=654)	Regulation	SRX497604	level 1	Prostate	H.sapiens
hsa-let-7c	chr21: 16419203(NR_136544)	chr21: 16419777-16419988(score=419)	Regulation	SRX847034	level 1	Prostate	H.sapiens
hsa-let-7c	chr21: 16419203(NR_136544)	chr21: 16419780-16419941(score=704)	Regulation	SRX101132	level 1	Prostate	H.sapiens
hsa-let-7c	chr21: 16419203(NR_136544)	chr21: 16419783-16419889(score=517)	Regulation	SRX1334494	level 1	Prostate	H.sapiens
hsa-let-7c	chr21: 16419203(NR_136544)	chr21: 16419793-16419927(score=430)	Regulation	SRX101135	level 1	Prostate	H.sapiens
hsa-let-7c	chr21: 16419203(NR_136544)	chr21: 16419797-16419846(score=260)	Regulation	SRX220080	level 1	Prostate	H.sapiens
hsa-let-7c	chr21: 16419203(NR_136544)	chr21: 16419811-16419883(score=352)	Regulation	SRX1334492	level 1	Prostate	H.sapiens
hsa-let-7c	chr21: 16419203(NR_136545)	chr21: 16419657-16420013(score=1000)	Regulation	SRX734410	level 1	Prostate	H.sapiens
hsa-let-7c	chr21: 16419203(NR_136545)	chr21: 16419660-16419952(score=309)	Regulation	SRX595676	level 1	Prostate	H.sapiens
hsa-let-7c	chr21: 16419203(NR_136545)	chr21: 16419711-16419943(score=1000)	Regulation	SRX173202	level 1	Prostate	H.sapiens
hsa-let-7c	chr21: 16419203(NR_136545)	chr21: 16419711-16419956(score=857)	Regulation	SRX734412	level 1	Prostate	H.sapiens
hsa-let-7c	chr21: 16419203(NR_136545)	chr21: 16419718-16419942(score=1000)	Regulation	SRX734411	level 1	Prostate	H.sapiens
hsa-let-7c	chr21: 16419203(NR_136545)	chr21: 16419726-16419973(score=900)	Regulation	SRX471208	level 1	Prostate	H.sapiens
hsa-let-7c	chr21: 16419203(NR_136545)	chr21: 16419730-16419938(score=453)	Regulation	SRX471850	level 1	Prostate	H.sapiens
hsa-let-7c	chr21: 16419203(NR_136545)	chr21: 16419731-16419975(score=906)	Regulation	SRX059704	level 1	Prostate	H.sapiens
hsa-let-7c	chr21: 16419203(NR_136545)	chr21: 16419733-16420041(score=296)	Regulation	SRX1569768	level 1	Prostate	H.sapiens
hsa-let-7c	chr21: 16419203(NR_136545)	chr21: 16419738-16419949(score=643)	Regulation	SRX734409	level 1	Prostate	H.sapiens
hsa-let-7c	chr21: 16419203(NR_136545)	chr21: 16419741-16419876(score=338)	Regulation	SRX736065	level 1	Prostate	H.sapiens
hsa-let-7c	chr21: 16419203(NR_136545)	chr21: 16419746-16419943(score=654)	Regulation	SRX2017926	level 1	Prostate	H.sapiens
hsa-let-7c	chr21: 16419203(NR_136545)	chr21: 16419754-16419938(score=506)	Regulation	SRX847035	level 1	Prostate	H.sapiens
hsa-let-7c	chr21: 16419203(NR_136545)	chr21: 16419760-16419943(score=755)	Regulation	SRX383815	level 1	Prostate	H.sapiens
hsa-let-7c	chr21: 16419203(NR_136545)	chr21: 16419766-16419952(score=442)	Regulation	SRX471849	level 1	Prostate	H.sapiens
hsa-let-7c	chr21: 16419203(NR_136545)	chr21: 16419773-16419886(score=515)	Regulation	SRX173201	level 1	Prostate	H.sapiens
hsa-let-7c	chr21: 16419203(NR_136545)	chr21: 16419775-16419929(score=700)	Regulation	SRX101130	level 1	Prostate	H.sapiens
hsa-let-7c	chr21: 16419203(NR_136545)	chr21: 16419777-16419914(score=654)	Regulation	SRX497604	level 1	Prostate	H.sapiens
hsa-let-7c	chr21: 16419203(NR_136545)	chr21: 16419777-16419988(score=419)	Regulation	SRX847034	level 1	Prostate	H.sapiens
hsa-let-7c	chr21: 16419203(NR_136545)	chr21: 16419780-16419941(score=704)	Regulation	SRX101132	level 1	Prostate	H.sapiens
hsa-let-7c	chr21: 16419203(NR_136545)	chr21: 16419783-16419889(score=517)	Regulation	SRX1334494	level 1	Prostate	H.sapiens
hsa-let-7c	chr21: 16419203(NR_136545)	chr21: 16419793-16419927(score=430)	Regulation	SRX101135	level 1	Prostate	H.sapiens
hsa-let-7c	chr21: 16419203(NR_136545)	chr21: 16419797-16419846(score=260)	Regulation	SRX220080	level 1	Prostate	H.sapiens
hsa-let-7c	chr21: 16419203(NR_136545)	chr21: 16419811-16419883(score=352)	Regulation	SRX1334492	level 1	Prostate	H.sapiens
hsa-let-7c	chr21: 16419203(NR_136546)	chr21: 16419657-16420013(score=1000)	Regulation	SRX734410	level 1	Prostate	H.sapiens
hsa-let-7c	chr21: 16419203(NR_136546)	chr21: 16419660-16419952(score=309)	Regulation	SRX595676	level 1	Prostate	H.sapiens
hsa-let-7c	chr21: 16419203(NR_136546)	chr21: 16419711-16419943(score=1000)	Regulation	SRX173202	level 1	Prostate	H.sapiens
hsa-let-7c	chr21: 16419203(NR_136546)	chr21: 16419711-16419956(score=857)	Regulation	SRX734412	level 1	Prostate	H.sapiens
hsa-let-7c	chr21: 16419203(NR_136546)	chr21: 16419718-16419942(score=1000)	Regulation	SRX734411	level 1	Prostate	H.sapiens
hsa-let-7c	chr21: 16419203(NR_136546)	chr21: 16419726-16419973(score=900)	Regulation	SRX471208	level 1	Prostate	H.sapiens
hsa-let-7c	chr21: 16419203(NR_136546)	chr21: 16419730-16419938(score=453)	Regulation	SRX471850	level 1	Prostate	H.sapiens
hsa-let-7c	chr21: 16419203(NR_136546)	chr21: 16419731-16419975(score=906)	Regulation	SRX059704	level 1	Prostate	H.sapiens
hsa-let-7c	chr21: 16419203(NR_136546)	chr21: 16419733-16420041(score=296)	Regulation	SRX1569768	level 1	Prostate	H.sapiens
hsa-let-7c	chr21: 16419203(NR_136546)	chr21: 16419738-16419949(score=643)	Regulation	SRX734409	level 1	Prostate	H.sapiens
hsa-let-7c	chr21: 16419203(NR_136546)	chr21: 16419741-16419876(score=338)	Regulation	SRX736065	level 1	Prostate	H.sapiens
hsa-let-7c	chr21: 16419203(NR_136546)	chr21: 16419746-16419943(score=654)	Regulation	SRX2017926	level 1	Prostate	H.sapiens
hsa-let-7c	chr21: 16419203(NR_136546)	chr21: 16419754-16419938(score=506)	Regulation	SRX847035	level 1	Prostate	H.sapiens
hsa-let-7c	chr21: 16419203(NR_136546)	chr21: 16419760-16419943(score=755)	Regulation	SRX383815	level 1	Prostate	H.sapiens
hsa-let-7c	chr21: 16419203(NR_136546)	chr21: 16419766-16419952(score=442)	Regulation	SRX471849	level 1	Prostate	H.sapiens
hsa-let-7c	chr21: 16419203(NR_136546)	chr21: 16419773-16419886(score=515)	Regulation	SRX173201	level 1	Prostate	H.sapiens
hsa-let-7c	chr21: 16419203(NR_136546)	chr21: 16419775-16419929(score=700)	Regulation	SRX101130	level 1	Prostate	H.sapiens
hsa-let-7c	chr21: 16419203(NR_136546)	chr21: 16419777-16419914(score=654)	Regulation	SRX497604	level 1	Prostate	H.sapiens
hsa-let-7c	chr21: 16419203(NR_136546)	chr21: 16419777-16419988(score=419)	Regulation	SRX847034	level 1	Prostate	H.sapiens
hsa-let-7c	chr21: 16419203(NR_136546)	chr21: 16419780-16419941(score=704)	Regulation	SRX101132	level 1	Prostate	H.sapiens
hsa-let-7c	chr21: 16419203(NR_136546)	chr21: 16419783-16419889(score=517)	Regulation	SRX1334494	level 1	Prostate	H.sapiens
hsa-let-7c	chr21: 16419203(NR_136546)	chr21: 16419793-16419927(score=430)	Regulation	SRX101135	level 1	Prostate	H.sapiens
hsa-let-7c	chr21: 16419203(NR_136546)	chr21: 16419797-16419846(score=260)	Regulation	SRX220080	level 1	Prostate	H.sapiens
hsa-let-7c	chr21: 16419203(NR_136546)	chr21: 16419811-16419883(score=352)	Regulation	SRX1334492	level 1	Prostate	H.sapiens
hsa-let-7c	chr21: 16420295(NR_136550)	chr21: 16419657-16420013(score=1000)	Regulation	SRX734410	level 1	Prostate	H.sapiens
hsa-let-7c	chr21: 16420295(NR_136550)	chr21: 16419660-16419952(score=309)	Regulation	SRX595676	level 1	Prostate	H.sapiens
hsa-let-7c	chr21: 16420295(NR_136550)	chr21: 16419711-16419943(score=1000)	Regulation	SRX173202	level 1	Prostate	H.sapiens
hsa-let-7c	chr21: 16420295(NR_136550)	chr21: 16419711-16419956(score=857)	Regulation	SRX734412	level 1	Prostate	H.sapiens
hsa-let-7c	chr21: 16420295(NR_136550)	chr21: 16419718-16419942(score=1000)	Regulation	SRX734411	level 1	Prostate	H.sapiens
hsa-let-7c	chr21: 16420295(NR_136550)	chr21: 16419726-16419973(score=900)	Regulation	SRX471208	level 1	Prostate	H.sapiens
hsa-let-7c	chr21: 16420295(NR_136550)	chr21: 16419730-16419938(score=453)	Regulation	SRX471850	level 1	Prostate	H.sapiens
hsa-let-7c	chr21: 16420295(NR_136550)	chr21: 16419731-16419975(score=906)	Regulation	SRX059704	level 1	Prostate	H.sapiens
hsa-let-7c	chr21: 16420295(NR_136550)	chr21: 16419733-16420041(score=296)	Regulation	SRX1569768	level 1	Prostate	H.sapiens
hsa-let-7c	chr21: 16420295(NR_136550)	chr21: 16419738-16419949(score=643)	Regulation	SRX734409	level 1	Prostate	H.sapiens
hsa-let-7c	chr21: 16420295(NR_136550)	chr21: 16419741-16419876(score=338)	Regulation	SRX736065	level 1	Prostate	H.sapiens
hsa-let-7c	chr21: 16420295(NR_136550)	chr21: 16419746-16419943(score=654)	Regulation	SRX2017926	level 1	Prostate	H.sapiens
hsa-let-7c	chr21: 16420295(NR_136550)	chr21: 16419754-16419938(score=506)	Regulation	SRX847035	level 1	Prostate	H.sapiens
hsa-let-7c	chr21: 16420295(NR_136550)	chr21: 16419760-16419943(score=755)	Regulation	SRX383815	level 1	Prostate	H.sapiens
hsa-let-7c	chr21: 16420295(NR_136550)	chr21: 16419766-16419952(score=442)	Regulation	SRX471849	level 1	Prostate	H.sapiens
hsa-let-7c	chr21: 16420295(NR_136550)	chr21: 16419773-16419886(score=515)	Regulation	SRX173201	level 1	Prostate	H.sapiens
hsa-let-7c	chr21: 16420295(NR_136550)	chr21: 16419775-16419929(score=700)	Regulation	SRX101130	level 1	Prostate	H.sapiens
hsa-let-7c	chr21: 16420295(NR_136550)	chr21: 16419777-16419914(score=654)	Regulation	SRX497604	level 1	Prostate	H.sapiens
hsa-let-7c	chr21: 16420295(NR_136550)	chr21: 16419777-16419988(score=419)	Regulation	SRX847034	level 1	Prostate	H.sapiens
hsa-let-7c	chr21: 16420295(NR_136550)	chr21: 16419780-16419941(score=704)	Regulation	SRX101132	level 1	Prostate	H.sapiens
hsa-let-7c	chr21: 16420295(NR_136550)	chr21: 16419783-16419889(score=517)	Regulation	SRX1334494	level 1	Prostate	H.sapiens
hsa-let-7c	chr21: 16420295(NR_136550)	chr21: 16419793-16419927(score=430)	Regulation	SRX101135	level 1	Prostate	H.sapiens
hsa-let-7c	chr21: 16420295(NR_136550)	chr21: 16419797-16419846(score=260)	Regulation	SRX220080	level 1	Prostate	H.sapiens
hsa-let-7c	chr21: 16420295(NR_136550)	chr21: 16419811-16419883(score=352)	Regulation	SRX1334492	level 1	Prostate	H.sapiens
hsa-let-7f-2	chrX: 53684029	chrX: 53683950-53684088(score=433)	Regulation	SRX2017936	level 2	Prostate	H.sapiens
hsa-let-7f-2	chrX: 53684029	chrX: 53684236-53684300(score=305)	Regulation	SRX2017937	level 2	Prostate	H.sapiens
hsa-let-7i	chr12: 62603686	chr12: 62602407-62602571(score=430)	Regulation	SRX734410	level 1	Prostate	H.sapiens
hsa-let-7i	chr12: 62603686	chr12: 62602463-62602740(score=403)	Regulation	SRX595677	level 1	Prostate	H.sapiens
hsa-let-7i	chr12: 62603686	chr12: 62603178-62603360(score=335)	Regulation	SRX734411	level 1	Prostate	H.sapiens
hsa-mir-1-2	chr18: 21829088	chr18: 21833627-21833928(score=439)	Regulation	SRX1569768	level 1	Prostate	H.sapiens
hsa-mir-1-2	chr18: 21829088	chr18: 21833636-21833991(score=1000)	Regulation	SRX173202	level 1	Prostate	H.sapiens
hsa-mir-1-2	chr18: 21829088	chr18: 21833641-21834033(score=564)	Regulation	SRX595671	level 1	Prostate	H.sapiens
hsa-mir-1-2	chr18: 21829088	chr18: 21833642-21834031(score=548)	Regulation	SRX1569767	level 1	Prostate	H.sapiens
hsa-mir-1-2	chr18: 21829088	chr18: 21833643-21833933(score=761)	Regulation	SRX736065	level 1	Prostate	H.sapiens
hsa-mir-1-2	chr18: 21829088	chr18: 21833646-21833978(score=1000)	Regulation	SRX059704	level 1	Prostate	H.sapiens
hsa-mir-1-2	chr18: 21829088	chr18: 21833649-21833956(score=1000)	Regulation	SRX667982	level 1	Prostate	H.sapiens
hsa-mir-1-2	chr18: 21829088	chr18: 21833652-21833906(score=635)	Regulation	SRX2545040	level 1	Prostate	H.sapiens
hsa-mir-1-2	chr18: 21829088	chr18: 21833654-21833971(score=1000)	Regulation	SRX667983	level 1	Prostate	H.sapiens
hsa-mir-1-2	chr18: 21829088	chr18: 21833658-21833963(score=1000)	Regulation	SRX2017926	level 1	Prostate	H.sapiens
hsa-mir-1-2	chr18: 21829088	chr18: 21833667-21833925(score=1000)	Regulation	SRX1950171	level 1	Prostate	H.sapiens
hsa-mir-1-2	chr18: 21829088	chr18: 21833669-21833938(score=1000)	Regulation	SRX1950172	level 1	Prostate	H.sapiens
hsa-mir-1-2	chr18: 21829088	chr18: 21833669-21834069(score=447)	Regulation	SRX595677	level 1	Prostate	H.sapiens
hsa-mir-1-2	chr18: 21829088	chr18: 21833671-21833928(score=744)	Regulation	SRX847034	level 1	Prostate	H.sapiens
hsa-mir-1-2	chr18: 21829088	chr18: 21833671-21833947(score=1000)	Regulation	SRX847035	level 1	Prostate	H.sapiens
hsa-mir-1-2	chr18: 21829088	chr18: 21833674-21833914(score=1000)	Regulation	SRX173201	level 1	Prostate	H.sapiens
hsa-mir-1-2	chr18: 21829088	chr18: 21833674-21833925(score=1000)	Regulation	SRX1950173	level 1	Prostate	H.sapiens
hsa-mir-1-2	chr18: 21829088	chr18: 21833675-21833916(score=1000)	Regulation	SRX1950170	level 1	Prostate	H.sapiens
hsa-mir-1-2	chr18: 21829088	chr18: 21833675-21833956(score=1000)	Regulation	SRX471208	level 1	Prostate	H.sapiens
hsa-mir-1-2	chr18: 21829088	chr18: 21833678-21833951(score=1000)	Regulation	SRX101132	level 1	Prostate	H.sapiens
hsa-mir-1-2	chr18: 21829088	chr18: 21833679-21833933(score=1000)	Regulation	SRX497604	level 1	Prostate	H.sapiens
hsa-mir-1-2	chr18: 21829088	chr18: 21833679-21833955(score=1000)	Regulation	SRX101130	level 1	Prostate	H.sapiens
hsa-mir-1-2	chr18: 21829088	chr18: 21833681-21833947(score=793)	Regulation	SRX471850	level 1	Prostate	H.sapiens
hsa-mir-1-2	chr18: 21829088	chr18: 21833683-21833923(score=875)	Regulation	SRX1818073	level 1	Prostate	H.sapiens
hsa-mir-1-2	chr18: 21829088	chr18: 21833684-21833913(score=821)	Regulation	SRX059705	level 1	Prostate	H.sapiens
hsa-mir-1-2	chr18: 21829088	chr18: 21833686-21833927(score=1000)	Regulation	SRX383815	level 1	Prostate	H.sapiens
hsa-mir-1-2	chr18: 21829088	chr18: 21833692-21833992(score=649)	Regulation	SRX099183	level 1	Prostate	H.sapiens
hsa-mir-1-2	chr18: 21829088	chr18: 21833694-21833914(score=818)	Regulation	SRX471851	level 1	Prostate	H.sapiens
hsa-mir-1-2	chr18: 21829088	chr18: 21833696-21833951(score=1000)	Regulation	SRX734411	level 1	Prostate	H.sapiens
hsa-mir-1-2	chr18: 21829088	chr18: 21833697-21833879(score=437)	Regulation	SRX736054	level 1	Prostate	H.sapiens
hsa-mir-1-2	chr18: 21829088	chr18: 21833700-21833901(score=1000)	Regulation	SRX497605	level 1	Prostate	H.sapiens
hsa-mir-1-2	chr18: 21829088	chr18: 21833701-21833938(score=719)	Regulation	SRX471852	level 1	Prostate	H.sapiens
hsa-mir-1-2	chr18: 21829088	chr18: 21833702-21833893(score=465)	Regulation	SRX2545038	level 1	Prostate	H.sapiens
hsa-mir-1-2	chr18: 21829088	chr18: 21833703-21833892(score=699)	Regulation	SRX1033275	level 1	Prostate	H.sapiens
hsa-mir-1-2	chr18: 21829088	chr18: 21833705-21833928(score=723)	Regulation	SRX471849	level 1	Prostate	H.sapiens
hsa-mir-1-2	chr18: 21829088	chr18: 21833705-21833961(score=510)	Regulation	SRX099182	level 1	Prostate	H.sapiens
hsa-mir-1-2	chr18: 21829088	chr18: 21833706-21833900(score=610)	Regulation	SRX433198	level 1	Prostate	H.sapiens
hsa-mir-1-2	chr18: 21829088	chr18: 21833706-21833902(score=733)	Regulation	SRX1334494	level 1	Prostate	H.sapiens
hsa-mir-1-2	chr18: 21829088	chr18: 21833708-21833852(score=391)	Regulation	SRX736074	level 1	Prostate	H.sapiens
hsa-mir-1-2	chr18: 21829088	chr18: 21833708-21833931(score=651)	Regulation	SRX471855	level 1	Prostate	H.sapiens
hsa-mir-1-2	chr18: 21829088	chr18: 21833709-21833939(score=722)	Regulation	SRX734412	level 1	Prostate	H.sapiens
hsa-mir-1-2	chr18: 21829088	chr18: 21833711-21833932(score=958)	Regulation	SRX101135	level 1	Prostate	H.sapiens
hsa-mir-1-2	chr18: 21829088	chr18: 21833712-21833878(score=490)	Regulation	SRX173207	level 1	Prostate	H.sapiens
hsa-mir-1-2	chr18: 21829088	chr18: 21833713-21833884(score=682)	Regulation	SRX736066	level 1	Prostate	H.sapiens
hsa-mir-1-2	chr18: 21829088	chr18: 21833713-21833910(score=749)	Regulation	SRX1818077	level 1	Prostate	H.sapiens
hsa-mir-1-2	chr18: 21829088	chr18: 21833713-21833910(score=795)	Regulation	SRX1818075	level 1	Prostate	H.sapiens
hsa-mir-1-2	chr18: 21829088	chr18: 21833714-21833869(score=336)	Regulation	SRX1818076	level 1	Prostate	H.sapiens
hsa-mir-1-2	chr18: 21829088	chr18: 21833715-21833837(score=376)	Regulation	SRX306507	level 1	Prostate	H.sapiens
hsa-mir-1-2	chr18: 21829088	chr18: 21833715-21833927(score=697)	Regulation	SRX2017927	level 1	Prostate	H.sapiens
hsa-mir-1-2	chr18: 21829088	chr18: 21833716-21833894(score=788)	Regulation	SRX1334492	level 1	Prostate	H.sapiens
hsa-mir-1-2	chr18: 21829088	chr18: 21833719-21833893(score=549)	Regulation	SRX433202	level 1	Prostate	H.sapiens
hsa-mir-1-2	chr18: 21829088	chr18: 21833720-21833861(score=381)	Regulation	SRX220080	level 1	Prostate	H.sapiens
hsa-mir-1-2	chr18: 21829088	chr18: 21833724-21833880(score=591)	Regulation	SRX433201	level 1	Prostate	H.sapiens
hsa-mir-1-2	chr18: 21829088	chr18: 21833725-21833847(score=397)	Regulation	SRX1033278	level 1	Prostate	H.sapiens
hsa-mir-1-2	chr18: 21829088	chr18: 21833727-21833891(score=586)	Regulation	SRX1885173	level 1	Prostate	H.sapiens
hsa-mir-1-2	chr18: 21829088	chr18: 21833731-21833928(score=431)	Regulation	SRX734409	level 1	Prostate	H.sapiens
hsa-mir-1-2	chr18: 21829088	chr18: 21833733-21833866(score=448)	Regulation	SRX306517	level 1	Prostate	H.sapiens
hsa-mir-1-2	chr18: 21829088	chr18: 21833734-21833953(score=438)	Regulation	SRX471856	level 1	Prostate	H.sapiens
hsa-mir-1-2	chr18: 21829088	chr18: 21833735-21833864(score=434)	Regulation	SRX083219	level 1	Prostate	H.sapiens
hsa-mir-1-2	chr18: 21829088	chr18: 21833737-21833893(score=640)	Regulation	SRX1885176	level 1	Prostate	H.sapiens
hsa-mir-1-2	chr18: 21829088	chr18: 21833739-21833857(score=512)	Regulation	SRX1334493	level 1	Prostate	H.sapiens
hsa-mir-1-2	chr18: 21829088	chr18: 21833745-21833897(score=494)	Regulation	SRX1885175	level 1	Prostate	H.sapiens
hsa-mir-1-2	chr18: 21829088	chr18: 21833746-21833872(score=440)	Regulation	SRX083218	level 1	Prostate	H.sapiens
hsa-mir-1-2	chr18: 21829088	chr18: 21833748-21833847(score=394)	Regulation	SRX698193	level 1	Prostate	H.sapiens
hsa-mir-1-2	chr18: 21829088	chr18: 21833749-21833936(score=886)	Regulation	SRX101133	level 1	Prostate	H.sapiens
hsa-mir-1-2	chr18: 21829088	chr18: 21833756-21833867(score=435)	Regulation	SRX022570	level 1	Prostate	H.sapiens
hsa-mir-1-2	chr18: 21829088	chr18: 21833758-21833932(score=502)	Regulation	SRX101137	level 1	Prostate	H.sapiens
hsa-mir-1-2	chr18: 21829088	chr18: 21833768-21833843(score=376)	Regulation	SRX1334491	level 1	Prostate	H.sapiens
hsa-mir-1-2	chr18: 21829088	chr18: 21833787-21833914(score=443)	Regulation	SRX101136	level 1	Prostate	H.sapiens
hsa-mir-1-2	chr18: 21829088	chr18: 21833791-21833849(score=328)	Regulation	SRX220079	level 1	Prostate	H.sapiens
hsa-mir-1-2	chr18: 21831406(NR_110369)	chr18: 21833627-21833928(score=439)	Regulation	SRX1569768	level 1	Prostate	H.sapiens
hsa-mir-1-2	chr18: 21831406(NR_110369)	chr18: 21833630-21834119(score=1000)	Regulation	SRX734410	level 1	Prostate	H.sapiens
hsa-mir-1-2	chr18: 21831406(NR_110369)	chr18: 21833636-21833991(score=1000)	Regulation	SRX173202	level 1	Prostate	H.sapiens
hsa-mir-1-2	chr18: 21831406(NR_110369)	chr18: 21833641-21834033(score=564)	Regulation	SRX595671	level 1	Prostate	H.sapiens
hsa-mir-1-2	chr18: 21831406(NR_110369)	chr18: 21833642-21834031(score=548)	Regulation	SRX1569767	level 1	Prostate	H.sapiens
hsa-mir-1-2	chr18: 21831406(NR_110369)	chr18: 21833643-21833933(score=761)	Regulation	SRX736065	level 1	Prostate	H.sapiens
hsa-mir-1-2	chr18: 21831406(NR_110369)	chr18: 21833646-21833978(score=1000)	Regulation	SRX059704	level 1	Prostate	H.sapiens
hsa-mir-1-2	chr18: 21831406(NR_110369)	chr18: 21833649-21833956(score=1000)	Regulation	SRX667982	level 1	Prostate	H.sapiens
hsa-mir-1-2	chr18: 21831406(NR_110369)	chr18: 21833652-21833906(score=635)	Regulation	SRX2545040	level 1	Prostate	H.sapiens
hsa-mir-1-2	chr18: 21831406(NR_110369)	chr18: 21833654-21833971(score=1000)	Regulation	SRX667983	level 1	Prostate	H.sapiens
hsa-mir-1-2	chr18: 21831406(NR_110369)	chr18: 21833658-21833963(score=1000)	Regulation	SRX2017926	level 1	Prostate	H.sapiens
hsa-mir-1-2	chr18: 21831406(NR_110369)	chr18: 21833667-21833925(score=1000)	Regulation	SRX1950171	level 1	Prostate	H.sapiens
hsa-mir-1-2	chr18: 21831406(NR_110369)	chr18: 21833669-21833938(score=1000)	Regulation	SRX1950172	level 1	Prostate	H.sapiens
hsa-mir-1-2	chr18: 21831406(NR_110369)	chr18: 21833669-21834069(score=447)	Regulation	SRX595677	level 1	Prostate	H.sapiens
hsa-mir-1-2	chr18: 21831406(NR_110369)	chr18: 21833671-21833928(score=744)	Regulation	SRX847034	level 1	Prostate	H.sapiens
hsa-mir-1-2	chr18: 21831406(NR_110369)	chr18: 21833671-21833947(score=1000)	Regulation	SRX847035	level 1	Prostate	H.sapiens
hsa-mir-1-2	chr18: 21831406(NR_110369)	chr18: 21833674-21833914(score=1000)	Regulation	SRX173201	level 1	Prostate	H.sapiens
hsa-mir-1-2	chr18: 21831406(NR_110369)	chr18: 21833674-21833925(score=1000)	Regulation	SRX1950173	level 1	Prostate	H.sapiens
hsa-mir-1-2	chr18: 21831406(NR_110369)	chr18: 21833675-21833916(score=1000)	Regulation	SRX1950170	level 1	Prostate	H.sapiens
hsa-mir-1-2	chr18: 21831406(NR_110369)	chr18: 21833675-21833956(score=1000)	Regulation	SRX471208	level 1	Prostate	H.sapiens
hsa-mir-1-2	chr18: 21831406(NR_110369)	chr18: 21833678-21833951(score=1000)	Regulation	SRX101132	level 1	Prostate	H.sapiens
hsa-mir-1-2	chr18: 21831406(NR_110369)	chr18: 21833679-21833933(score=1000)	Regulation	SRX497604	level 1	Prostate	H.sapiens
hsa-mir-1-2	chr18: 21831406(NR_110369)	chr18: 21833679-21833955(score=1000)	Regulation	SRX101130	level 1	Prostate	H.sapiens
hsa-mir-1-2	chr18: 21831406(NR_110369)	chr18: 21833681-21833947(score=793)	Regulation	SRX471850	level 1	Prostate	H.sapiens
hsa-mir-1-2	chr18: 21831406(NR_110369)	chr18: 21833683-21833923(score=875)	Regulation	SRX1818073	level 1	Prostate	H.sapiens
hsa-mir-1-2	chr18: 21831406(NR_110369)	chr18: 21833684-21833913(score=821)	Regulation	SRX059705	level 1	Prostate	H.sapiens
hsa-mir-1-2	chr18: 21831406(NR_110369)	chr18: 21833686-21833927(score=1000)	Regulation	SRX383815	level 1	Prostate	H.sapiens
hsa-mir-1-2	chr18: 21831406(NR_110369)	chr18: 21833692-21833992(score=649)	Regulation	SRX099183	level 1	Prostate	H.sapiens
hsa-mir-1-2	chr18: 21831406(NR_110369)	chr18: 21833694-21833914(score=818)	Regulation	SRX471851	level 1	Prostate	H.sapiens
hsa-mir-1-2	chr18: 21831406(NR_110369)	chr18: 21833696-21833951(score=1000)	Regulation	SRX734411	level 1	Prostate	H.sapiens
hsa-mir-1-2	chr18: 21831406(NR_110369)	chr18: 21833697-21833879(score=437)	Regulation	SRX736054	level 1	Prostate	H.sapiens
hsa-mir-1-2	chr18: 21831406(NR_110369)	chr18: 21833700-21833901(score=1000)	Regulation	SRX497605	level 1	Prostate	H.sapiens
hsa-mir-1-2	chr18: 21831406(NR_110369)	chr18: 21833701-21833938(score=719)	Regulation	SRX471852	level 1	Prostate	H.sapiens
hsa-mir-1-2	chr18: 21831406(NR_110369)	chr18: 21833702-21833893(score=465)	Regulation	SRX2545038	level 1	Prostate	H.sapiens
hsa-mir-1-2	chr18: 21831406(NR_110369)	chr18: 21833703-21833892(score=699)	Regulation	SRX1033275	level 1	Prostate	H.sapiens
hsa-mir-1-2	chr18: 21831406(NR_110369)	chr18: 21833705-21833928(score=723)	Regulation	SRX471849	level 1	Prostate	H.sapiens
hsa-mir-1-2	chr18: 21831406(NR_110369)	chr18: 21833705-21833961(score=510)	Regulation	SRX099182	level 1	Prostate	H.sapiens
hsa-mir-1-2	chr18: 21831406(NR_110369)	chr18: 21833706-21833900(score=610)	Regulation	SRX433198	level 1	Prostate	H.sapiens
hsa-mir-1-2	chr18: 21831406(NR_110369)	chr18: 21833706-21833902(score=733)	Regulation	SRX1334494	level 1	Prostate	H.sapiens
hsa-mir-1-2	chr18: 21831406(NR_110369)	chr18: 21833708-21833852(score=391)	Regulation	SRX736074	level 1	Prostate	H.sapiens
hsa-mir-1-2	chr18: 21831406(NR_110369)	chr18: 21833708-21833931(score=651)	Regulation	SRX471855	level 1	Prostate	H.sapiens
hsa-mir-1-2	chr18: 21831406(NR_110369)	chr18: 21833709-21833939(score=722)	Regulation	SRX734412	level 1	Prostate	H.sapiens
hsa-mir-1-2	chr18: 21831406(NR_110369)	chr18: 21833711-21833932(score=958)	Regulation	SRX101135	level 1	Prostate	H.sapiens
hsa-mir-1-2	chr18: 21831406(NR_110369)	chr18: 21833712-21833878(score=490)	Regulation	SRX173207	level 1	Prostate	H.sapiens
hsa-mir-1-2	chr18: 21831406(NR_110369)	chr18: 21833713-21833884(score=682)	Regulation	SRX736066	level 1	Prostate	H.sapiens
hsa-mir-1-2	chr18: 21831406(NR_110369)	chr18: 21833713-21833910(score=749)	Regulation	SRX1818077	level 1	Prostate	H.sapiens
hsa-mir-1-2	chr18: 21831406(NR_110369)	chr18: 21833713-21833910(score=795)	Regulation	SRX1818075	level 1	Prostate	H.sapiens
hsa-mir-1-2	chr18: 21831406(NR_110369)	chr18: 21833714-21833869(score=336)	Regulation	SRX1818076	level 1	Prostate	H.sapiens
hsa-mir-1-2	chr18: 21831406(NR_110369)	chr18: 21833715-21833837(score=376)	Regulation	SRX306507	level 1	Prostate	H.sapiens
hsa-mir-1-2	chr18: 21831406(NR_110369)	chr18: 21833715-21833927(score=697)	Regulation	SRX2017927	level 1	Prostate	H.sapiens
hsa-mir-1-2	chr18: 21831406(NR_110369)	chr18: 21833716-21833894(score=788)	Regulation	SRX1334492	level 1	Prostate	H.sapiens
hsa-mir-1-2	chr18: 21831406(NR_110369)	chr18: 21833719-21833893(score=549)	Regulation	SRX433202	level 1	Prostate	H.sapiens
hsa-mir-1-2	chr18: 21831406(NR_110369)	chr18: 21833720-21833861(score=381)	Regulation	SRX220080	level 1	Prostate	H.sapiens
hsa-mir-1-2	chr18: 21831406(NR_110369)	chr18: 21833724-21833880(score=591)	Regulation	SRX433201	level 1	Prostate	H.sapiens
hsa-mir-1-2	chr18: 21831406(NR_110369)	chr18: 21833725-21833847(score=397)	Regulation	SRX1033278	level 1	Prostate	H.sapiens
hsa-mir-1-2	chr18: 21831406(NR_110369)	chr18: 21833727-21833891(score=586)	Regulation	SRX1885173	level 1	Prostate	H.sapiens
hsa-mir-1-2	chr18: 21831406(NR_110369)	chr18: 21833731-21833928(score=431)	Regulation	SRX734409	level 1	Prostate	H.sapiens
hsa-mir-1-2	chr18: 21831406(NR_110369)	chr18: 21833733-21833866(score=448)	Regulation	SRX306517	level 1	Prostate	H.sapiens
hsa-mir-1-2	chr18: 21831406(NR_110369)	chr18: 21833734-21833953(score=438)	Regulation	SRX471856	level 1	Prostate	H.sapiens
hsa-mir-1-2	chr18: 21831406(NR_110369)	chr18: 21833735-21833864(score=434)	Regulation	SRX083219	level 1	Prostate	H.sapiens
hsa-mir-1-2	chr18: 21831406(NR_110369)	chr18: 21833737-21833893(score=640)	Regulation	SRX1885176	level 1	Prostate	H.sapiens
hsa-mir-1-2	chr18: 21831406(NR_110369)	chr18: 21833739-21833857(score=512)	Regulation	SRX1334493	level 1	Prostate	H.sapiens
hsa-mir-1-2	chr18: 21831406(NR_110369)	chr18: 21833745-21833897(score=494)	Regulation	SRX1885175	level 1	Prostate	H.sapiens
hsa-mir-1-2	chr18: 21831406(NR_110369)	chr18: 21833746-21833872(score=440)	Regulation	SRX083218	level 1	Prostate	H.sapiens
hsa-mir-1-2	chr18: 21831406(NR_110369)	chr18: 21833748-21833847(score=394)	Regulation	SRX698193	level 1	Prostate	H.sapiens
hsa-mir-1-2	chr18: 21831406(NR_110369)	chr18: 21833749-21833936(score=886)	Regulation	SRX101133	level 1	Prostate	H.sapiens
hsa-mir-1-2	chr18: 21831406(NR_110369)	chr18: 21833756-21833867(score=435)	Regulation	SRX022570	level 1	Prostate	H.sapiens
hsa-mir-1-2	chr18: 21831406(NR_110369)	chr18: 21833758-21833932(score=502)	Regulation	SRX101137	level 1	Prostate	H.sapiens
hsa-mir-1-2	chr18: 21831406(NR_110369)	chr18: 21833766-21834106(score=349)	Regulation	SRX595676	level 1	Prostate	H.sapiens
hsa-mir-1-2	chr18: 21831406(NR_110369)	chr18: 21833768-21833843(score=376)	Regulation	SRX1334491	level 1	Prostate	H.sapiens
hsa-mir-1-2	chr18: 21831406(NR_110369)	chr18: 21833776-21834193(score=411)	Regulation	SRX502073	level 1	Prostate	H.sapiens
hsa-mir-1-2	chr18: 21831406(NR_110369)	chr18: 21833787-21833914(score=443)	Regulation	SRX101136	level 1	Prostate	H.sapiens
hsa-mir-1-2	chr18: 21831406(NR_110369)	chr18: 21833791-21833849(score=328)	Regulation	SRX220079	level 1	Prostate	H.sapiens
hsa-mir-1-2	chr18: 21831406(NR_110369)	chr18: 21834366-21834597(score=862)	Regulation	SRX173202	level 1	Prostate	H.sapiens
hsa-mir-1-2	chr18: 21831406(NR_110369)	chr18: 21834382-21834554(score=441)	Regulation	SRX1950172	level 1	Prostate	H.sapiens
hsa-mir-1-2	chr18: 21831406(NR_110369)	chr18: 21834385-21834564(score=470)	Regulation	SRX497604	level 1	Prostate	H.sapiens
hsa-mir-100	chr11: 122152308	chr11: 122156421-122156593(score=751)	Regulation	SRX433201	level 1	Prostate	H.sapiens
hsa-mir-100	chr11: 122156371(NR_137188)	chr11: 122156421-122156593(score=751)	Regulation	SRX433201	level 1	Prostate	H.sapiens
hsa-mir-100	chr11: 122156371(NR_137194)	chr11: 122156421-122156593(score=751)	Regulation	SRX433201	level 1	Prostate	H.sapiens
hsa-mir-100	chr11: 122157113(NR_137186)	chr11: 122156421-122156593(score=751)	Regulation	SRX433201	level 1	Prostate	H.sapiens
hsa-mir-100	chr11: 122157113(NR_137187)	chr11: 122156421-122156593(score=751)	Regulation	SRX433201	level 1	Prostate	H.sapiens
hsa-mir-100	chr11: 122203109(NR_024430)	chr11: 122203270-122203672(score=1000)	Regulation	SRX433201	level 1	Prostate	H.sapiens
hsa-mir-100	chr11: 122203109(NR_024430)	chr11: 122203290-122203671(score=735)	Regulation	SRX433198	level 1	Prostate	H.sapiens
hsa-mir-100	chr11: 122203109(NR_024430)	chr11: 122203334-122203664(score=546)	Regulation	SRX433197	level 1	Prostate	H.sapiens
hsa-mir-100	chr11: 122203109(NR_024430)	chr11: 122203383-122203683(score=815)	Regulation	SRX433202	level 1	Prostate	H.sapiens
hsa-mir-100	chr11: 122203109(NR_137181)	chr11: 122203270-122203672(score=1000)	Regulation	SRX433201	level 1	Prostate	H.sapiens
hsa-mir-100	chr11: 122203109(NR_137181)	chr11: 122203290-122203671(score=735)	Regulation	SRX433198	level 1	Prostate	H.sapiens
hsa-mir-100	chr11: 122203109(NR_137181)	chr11: 122203334-122203664(score=546)	Regulation	SRX433197	level 1	Prostate	H.sapiens
hsa-mir-100	chr11: 122203109(NR_137181)	chr11: 122203383-122203683(score=815)	Regulation	SRX433202	level 1	Prostate	H.sapiens
hsa-mir-100	chr11: 122203109(NR_137182)	chr11: 122203270-122203672(score=1000)	Regulation	SRX433201	level 1	Prostate	H.sapiens
hsa-mir-100	chr11: 122203109(NR_137182)	chr11: 122203290-122203671(score=735)	Regulation	SRX433198	level 1	Prostate	H.sapiens
hsa-mir-100	chr11: 122203109(NR_137182)	chr11: 122203334-122203664(score=546)	Regulation	SRX433197	level 1	Prostate	H.sapiens
hsa-mir-100	chr11: 122203109(NR_137182)	chr11: 122203383-122203683(score=815)	Regulation	SRX433202	level 1	Prostate	H.sapiens
hsa-mir-101-2	chr9: 4839769(NM_001286701)	chr9: 4839411-4839752(score=1000)	Regulation	SRX433198	level 1	Prostate	H.sapiens
hsa-mir-101-2	chr9: 4839769(NM_001286701)	chr9: 4839421-4839697(score=907)	Regulation	SRX433197	level 1	Prostate	H.sapiens
hsa-mir-101-2	chr9: 4839769(NM_001286701)	chr9: 4839458-4839705(score=661)	Regulation	SRX433201	level 1	Prostate	H.sapiens
hsa-mir-101-2	chr9: 4839769(NM_001286701)	chr9: 4839459-4839680(score=745)	Regulation	SRX433202	level 1	Prostate	H.sapiens
hsa-mir-101-2	chr9: 4839769(NM_001286701)	chr9: 4839548-4839657(score=294)	Regulation	SRX306516	level 1	Prostate	H.sapiens
hsa-mir-10392	chr11: 64878609	chr11: 64878730-64878897(score=1000)	Regulation	SRX2017936	level 1	Prostate	H.sapiens
hsa-mir-10392	chr11: 64878609	chr11: 64878761-64878889(score=471)	Regulation	SRX2017937	level 1	Prostate	H.sapiens
hsa-mir-10392	chr11: 64878768(NM_006795)	chr11: 64878730-64878897(score=1000)	Regulation	SRX2017936	level 1	Prostate	H.sapiens
hsa-mir-10392	chr11: 64878768(NM_006795)	chr11: 64878761-64878889(score=471)	Regulation	SRX2017937	level 1	Prostate	H.sapiens
hsa-mir-10392	chr11: 64879713(NM_001282444)	chr11: 64878730-64878897(score=1000)	Regulation	SRX2017936	level 1	Prostate	H.sapiens
hsa-mir-10392	chr11: 64879713(NM_001282444)	chr11: 64878761-64878889(score=471)	Regulation	SRX2017937	level 1	Prostate	H.sapiens
hsa-mir-10392	chr11: 64879713(NM_001282445)	chr11: 64878730-64878897(score=1000)	Regulation	SRX2017936	level 1	Prostate	H.sapiens
hsa-mir-10392	chr11: 64879713(NM_001282445)	chr11: 64878761-64878889(score=471)	Regulation	SRX2017937	level 1	Prostate	H.sapiens
hsa-mir-10393	chr15: 44711487(NM_004048)	chr15: 44707353-44707594(score=1000)	Regulation	SRX433201	level 1	Prostate	H.sapiens
hsa-mir-10393	chr15: 44711487(NM_004048)	chr15: 44707355-44707595(score=1000)	Regulation	SRX433202	level 1	Prostate	H.sapiens
hsa-mir-10393	chr15: 44711487(NM_004048)	chr15: 44707367-44707591(score=1000)	Regulation	SRX433198	level 1	Prostate	H.sapiens
hsa-mir-10393	chr15: 44711487(NM_004048)	chr15: 44707373-44707575(score=926)	Regulation	SRX433197	level 1	Prostate	H.sapiens
hsa-mir-10393	chr15: 44711487(NM_004048)	chr15: 44712161-44712441(score=1000)	Regulation	SRX173202	level 1	Prostate	H.sapiens
hsa-mir-10393	chr15: 44711487(NM_004048)	chr15: 44712194-44712433(score=627)	Regulation	SRX502070	level 1	Prostate	H.sapiens
hsa-mir-10393	chr15: 44711487(NM_004048)	chr15: 44712203-44712419(score=927)	Regulation	SRX059704	level 1	Prostate	H.sapiens
hsa-mir-10393	chr15: 44711487(NM_004048)	chr15: 44712206-44712409(score=837)	Regulation	SRX667983	level 1	Prostate	H.sapiens
hsa-mir-10393	chr15: 44711487(NM_004048)	chr15: 44712207-44712417(score=781)	Regulation	SRX1950172	level 1	Prostate	H.sapiens
hsa-mir-10393	chr15: 44711487(NM_004048)	chr15: 44712209-44712386(score=735)	Regulation	SRX101132	level 1	Prostate	H.sapiens
hsa-mir-10393	chr15: 44711487(NM_004048)	chr15: 44712210-44712419(score=886)	Regulation	SRX471208	level 1	Prostate	H.sapiens
hsa-mir-10393	chr15: 44711487(NM_004048)	chr15: 44712214-44712406(score=626)	Regulation	SRX471849	level 1	Prostate	H.sapiens
hsa-mir-10393	chr15: 44711487(NM_004048)	chr15: 44712215-44712404(score=721)	Regulation	SRX667982	level 1	Prostate	H.sapiens
hsa-mir-10393	chr15: 44711487(NM_004048)	chr15: 44712217-44712398(score=617)	Regulation	SRX2017926	level 1	Prostate	H.sapiens
hsa-mir-10393	chr15: 44711487(NM_004048)	chr15: 44712218-44712377(score=508)	Regulation	SRX1818073	level 1	Prostate	H.sapiens
hsa-mir-10393	chr15: 44711487(NM_004048)	chr15: 44712219-44712396(score=920)	Regulation	SRX383815	level 1	Prostate	H.sapiens
hsa-mir-10393	chr15: 44711487(NM_004048)	chr15: 44712223-44712386(score=804)	Regulation	SRX497604	level 1	Prostate	H.sapiens
hsa-mir-10393	chr15: 44711487(NM_004048)	chr15: 44712223-44712412(score=605)	Regulation	SRX847035	level 1	Prostate	H.sapiens
hsa-mir-10393	chr15: 44711487(NM_004048)	chr15: 44712225-44712408(score=1000)	Regulation	SRX101130	level 1	Prostate	H.sapiens
hsa-mir-10393	chr15: 44711487(NM_004048)	chr15: 44712247-44712377(score=463)	Regulation	SRX173201	level 1	Prostate	H.sapiens
hsa-mir-10396a	chr21: 8986999	chr21: 8986710-8987558(score=681)	Regulation	SRX2017936	level 1	Prostate	H.sapiens
hsa-mir-10396a	chr21: 8986999	chr21: 8986710-8987682(score=1000)	Regulation	SRX433202	level 1	Prostate	H.sapiens
hsa-mir-10396a	chr21: 8986999	chr21: 8986724-8987035(score=285)	Regulation	SRX1818077	level 1	Prostate	H.sapiens
hsa-mir-10396a	chr21: 8986999	chr21: 8986728-8986865(score=511)	Regulation	SRX306516	level 1	Prostate	H.sapiens
hsa-mir-10396a	chr21: 8986999	chr21: 8986729-8987505(score=534)	Regulation	SRX502073	level 1	Prostate	H.sapiens
hsa-mir-10396a	chr21: 8986999	chr21: 8986736-8987528(score=679)	Regulation	SRX1885176	level 1	Prostate	H.sapiens
hsa-mir-10396a	chr21: 8986999	chr21: 8986741-8987517(score=710)	Regulation	SRX2017926	level 1	Prostate	H.sapiens
hsa-mir-10396a	chr21: 8986999	chr21: 8986743-8986854(score=326)	Regulation	SRX357297	level 1	Prostate	H.sapiens
hsa-mir-10396a	chr21: 8986999	chr21: 8986743-8986861(score=354)	Regulation	SRX433196	level 1	Prostate	H.sapiens
hsa-mir-10396a	chr21: 8986999	chr21: 8986743-8987542(score=691)	Regulation	SRX433201	level 1	Prostate	H.sapiens
hsa-mir-10396a	chr21: 8986999	chr21: 8986744-8987014(score=310)	Regulation	SRX1702478	level 1	Prostate	H.sapiens
hsa-mir-10396a	chr21: 8986999	chr21: 8986747-8986849(score=325)	Regulation	SRX357293	level 1	Prostate	H.sapiens
hsa-mir-10396a	chr21: 8986999	chr21: 8986747-8986857(score=320)	Regulation	SRX357296	level 1	Prostate	H.sapiens
hsa-mir-10396a	chr21: 8986999	chr21: 8986748-8986858(score=476)	Regulation	SRX383816	level 1	Prostate	H.sapiens
hsa-mir-10396a	chr21: 8986999	chr21: 8986751-8986857(score=286)	Regulation	SRX357292	level 1	Prostate	H.sapiens
hsa-mir-10396a	chr21: 8986999	chr21: 8986753-8987546(score=793)	Regulation	SRX433198	level 1	Prostate	H.sapiens
hsa-mir-10396a	chr21: 8986999	chr21: 8986756-8986845(score=303)	Regulation	SRX1640090	level 1	Prostate	H.sapiens
hsa-mir-10396a	chr21: 8986999	chr21: 8986757-8986854(score=261)	Regulation	SRX2017937	level 1	Prostate	H.sapiens
hsa-mir-10396a	chr21: 8986999	chr21: 8986758-8986884(score=417)	Regulation	SRX1033275	level 1	Prostate	H.sapiens
hsa-mir-10396a	chr21: 8986999	chr21: 8986770-8986892(score=420)	Regulation	SRX470407	level 1	Prostate	H.sapiens
hsa-mir-10396a	chr21: 8986999	chr21: 8986810-8986985(score=376)	Regulation	SRX667983	level 1	Prostate	H.sapiens
hsa-mir-10396a	chr21: 8986999	chr21: 8986810-8987560(score=1000)	Regulation	SRX596538	level 1	Prostate	H.sapiens
hsa-mir-10396a	chr21: 8986999	chr21: 8986810-8987574(score=1000)	Regulation	SRX596536	level 1	Prostate	H.sapiens
hsa-mir-10396a	chr21: 8986999	chr21: 8986819-8987505(score=505)	Regulation	SRX433197	level 1	Prostate	H.sapiens
hsa-mir-10396a	chr21: 8986999	chr21: 8986831-8987583(score=999)	Regulation	SRX596537	level 1	Prostate	H.sapiens
hsa-mir-10396a	chr21: 8986999	chr21: 8986869-8987610(score=906)	Regulation	SRX1033288	level 1	Prostate	H.sapiens
hsa-mir-10396a	chr21: 8986999	chr21: 8986882-8987640(score=668)	Regulation	SRX1033289	level 1	Prostate	H.sapiens
hsa-mir-10396a	chr21: 8986999	chr21: 8986914-8987513(score=858)	Regulation	SRX2545038	level 1	Prostate	H.sapiens
hsa-mir-10396a	chr21: 8986999	chr21: 8986914-8987606(score=649)	Regulation	SRX698190	level 1	Prostate	H.sapiens
hsa-mir-10396a	chr21: 8986999	chr21: 8986926-8987534(score=516)	Regulation	SRX1885174	level 1	Prostate	H.sapiens
hsa-mir-10396a	chr21: 8986999	chr21: 8986940-8987511(score=386)	Regulation	SRX357293	level 1	Prostate	H.sapiens
hsa-mir-10396a	chr21: 8986999	chr21: 8986943-8987482(score=286)	Regulation	SRX357292	level 1	Prostate	H.sapiens
hsa-mir-10396a	chr21: 8986999	chr21: 8986944-8987480(score=326)	Regulation	SRX357296	level 1	Prostate	H.sapiens
hsa-mir-10396a	chr21: 8986999	chr21: 8986946-8987434(score=394)	Regulation	SRX433196	level 1	Prostate	H.sapiens
hsa-mir-10396a	chr21: 8986999	chr21: 8986948-8987569(score=749)	Regulation	SRX306516	level 1	Prostate	H.sapiens
hsa-mir-10396a	chr21: 8986999	chr21: 8986949-8987482(score=331)	Regulation	SRX357297	level 1	Prostate	H.sapiens
hsa-mir-10396a	chr21: 8986999	chr21: 8986951-8987622(score=941)	Regulation	SRX470407	level 1	Prostate	H.sapiens
hsa-mir-10396a	chr21: 8986999	chr21: 8986953-8987618(score=674)	Regulation	SRX383816	level 1	Prostate	H.sapiens
hsa-mir-10396a	chr21: 8986999	chr21: 8986956-8987292(score=369)	Regulation	SRX2017937	level 1	Prostate	H.sapiens
hsa-mir-10396a	chr21: 8986999	chr21: 8986963-8987621(score=902)	Regulation	SRX1033275	level 1	Prostate	H.sapiens
hsa-mir-10396a	chr21: 8986999	chr21: 8986967-8987491(score=384)	Regulation	SRX847035	level 1	Prostate	H.sapiens
hsa-mir-10396a	chr21: 8986999	chr21: 8986977-8987476(score=669)	Regulation	SRX306517	level 1	Prostate	H.sapiens
hsa-mir-10396a	chr21: 8986999	chr21: 8986978-8987469(score=610)	Regulation	SRX1640090	level 1	Prostate	H.sapiens
hsa-mir-10396a	chr21: 8986999	chr21: 8986983-8987482(score=751)	Regulation	SRX1033278	level 1	Prostate	H.sapiens
hsa-mir-10396a	chr21: 8986999	chr21: 8986988-8987465(score=656)	Regulation	SRX736066	level 1	Prostate	H.sapiens
hsa-mir-10396a	chr21: 8986999	chr21: 8986990-8987051(score=277)	Regulation	SRX1885178	level 1	Prostate	H.sapiens
hsa-mir-10396a	chr21: 8986999	chr21: 8986990-8987483(score=534)	Regulation	SRX1640091	level 1	Prostate	H.sapiens
hsa-mir-10396a	chr21: 8986999	chr21: 8986993-8987474(score=863)	Regulation	SRX470408	level 1	Prostate	H.sapiens
hsa-mir-10396a	chr21: 8986999	chr21: 8986999-8987464(score=722)	Regulation	SRX698193	level 1	Prostate	H.sapiens
hsa-mir-10396a	chr21: 8986999	chr21: 8987000-8987450(score=594)	Regulation	SRX306508	level 1	Prostate	H.sapiens
hsa-mir-10396a	chr21: 8986999	chr21: 8987001-8987152(score=454)	Regulation	SRX306515	level 1	Prostate	H.sapiens
hsa-mir-10396a	chr21: 8986999	chr21: 8987004-8987445(score=518)	Regulation	SRX1033281	level 1	Prostate	H.sapiens
hsa-mir-10396a	chr21: 8986999	chr21: 8987004-8987485(score=660)	Regulation	SRX306507	level 1	Prostate	H.sapiens
hsa-mir-10396a	chr21: 8986999	chr21: 8987007-8987157(score=372)	Regulation	SRX306514	level 1	Prostate	H.sapiens
hsa-mir-10396a	chr21: 8986999	chr21: 8987010-8987142(score=325)	Regulation	SRX1885180	level 1	Prostate	H.sapiens
hsa-mir-10396a	chr21: 8986999	chr21: 8987010-8987150(score=450)	Regulation	SRX306518	level 1	Prostate	H.sapiens
hsa-mir-10396a	chr21: 8986999	chr21: 8987012-8987462(score=611)	Regulation	SRX736065	level 1	Prostate	H.sapiens
hsa-mir-10396a	chr21: 8986999	chr21: 8987014-8987477(score=600)	Regulation	SRX1033267	level 1	Prostate	H.sapiens
hsa-mir-10396a	chr21: 8986999	chr21: 8987019-8987469(score=533)	Regulation	SRX142907	level 1	Prostate	H.sapiens
hsa-mir-10396a	chr21: 8986999	chr21: 8987021-8987447(score=470)	Regulation	SRX1033269	level 1	Prostate	H.sapiens
hsa-mir-10396a	chr21: 8986999	chr21: 8987022-8987470(score=674)	Regulation	SRX142906	level 1	Prostate	H.sapiens
hsa-mir-10396a	chr21: 8986999	chr21: 8987025-8987143(score=340)	Regulation	SRX1033266	level 1	Prostate	H.sapiens
hsa-mir-10396a	chr21: 8986999	chr21: 8987063-8987465(score=542)	Regulation	SRX2545039	level 1	Prostate	H.sapiens
hsa-mir-10396a	chr21: 8986999	chr21: 8987064-8987450(score=531)	Regulation	SRX147605	level 1	Prostate	H.sapiens
hsa-mir-10396a	chr21: 8986999	chr21: 8987086-8987450(score=489)	Regulation	SRX306506	level 1	Prostate	H.sapiens
hsa-mir-10396a	chr21: 8986999	chr21: 8987090-8987156(score=315)	Regulation	SRX2420129	level 1	Prostate	H.sapiens
hsa-mir-10396a	chr21: 8986999	chr21: 8987094-8987144(score=347)	Regulation	SRX306519	level 1	Prostate	H.sapiens
hsa-mir-10396a	chr21: 8986999	chr21: 8987099-8987215(score=256)	Regulation	SRX2420134	level 1	Prostate	H.sapiens
hsa-mir-10396a	chr21: 8986999	chr21: 8987104-8987221(score=245)	Regulation	SRX2420135	level 1	Prostate	H.sapiens
hsa-mir-10396a	chr21: 8986999	chr21: 8987107-8987463(score=388)	Regulation	SRX847033	level 1	Prostate	H.sapiens
hsa-mir-10396a	chr21: 8986999	chr21: 8987110-8987480(score=603)	Regulation	SRX1818077	level 1	Prostate	H.sapiens
hsa-mir-10396a	chr21: 8986999	chr21: 8987111-8987452(score=466)	Regulation	SRX220000	level 1	Prostate	H.sapiens
hsa-mir-10396a	chr21: 8986999	chr21: 8987125-8987462(score=675)	Regulation	SRX736075	level 1	Prostate	H.sapiens
hsa-mir-10396a	chr21: 8986999	chr21: 8987151-8987447(score=424)	Regulation	SRX667982	level 1	Prostate	H.sapiens
hsa-mir-10396a	chr21: 8986999	chr21: 8987154-8987457(score=557)	Regulation	SRX2545040	level 1	Prostate	H.sapiens
hsa-mir-10396a	chr21: 8986999	chr21: 8987155-8987276(score=279)	Regulation	SRX220001	level 1	Prostate	H.sapiens
hsa-mir-10396a	chr21: 8986999	chr21: 8987163-8987422(score=753)	Regulation	SRX176056	level 1	Prostate	H.sapiens
hsa-mir-10396a	chr21: 8986999	chr21: 8987163-8987477(score=478)	Regulation	SRX667983	level 1	Prostate	H.sapiens
hsa-mir-10396a	chr21: 8986999	chr21: 8987165-8987474(score=708)	Regulation	SRX758011	level 1	Prostate	H.sapiens
hsa-mir-10396a	chr21: 8986999	chr21: 8987167-8987472(score=537)	Regulation	SRX736074	level 1	Prostate	H.sapiens
hsa-mir-10396a	chr21: 8986999	chr21: 8987182-8987419(score=389)	Regulation	SRX882954	level 1	Prostate	H.sapiens
hsa-mir-10396a	chr21: 8986999	chr21: 8987194-8987237(score=226)	Regulation	SRX220075	level 1	Prostate	H.sapiens
hsa-mir-10396a	chr21: 8986999	chr21: 8987208-8987440(score=480)	Regulation	SRX306515	level 1	Prostate	H.sapiens
hsa-mir-10396a	chr21: 8986999	chr21: 8987215-8987459(score=573)	Regulation	SRX698191	level 1	Prostate	H.sapiens
hsa-mir-10396a	chr21: 8986999	chr21: 8987236-8987421(score=375)	Regulation	SRX1702478	level 1	Prostate	H.sapiens
hsa-mir-10396a	chr21: 8986999	chr21: 8987241-8987405(score=252)	Regulation	SRX502071	level 1	Prostate	H.sapiens
hsa-mir-10396a	chr21: 8986999	chr21: 8987245-8987459(score=524)	Regulation	SRX698192	level 1	Prostate	H.sapiens
hsa-mir-10396a	chr21: 8986999	chr21: 8987252-8987401(score=312)	Regulation	SRX502070	level 1	Prostate	H.sapiens
hsa-mir-10396a	chr21: 8986999	chr21: 8987264-8987464(score=737)	Regulation	SRX1033266	level 1	Prostate	H.sapiens
hsa-mir-10396a	chr21: 8986999	chr21: 8987287-8987442(score=300)	Regulation	SRX2017927	level 1	Prostate	H.sapiens
hsa-mir-10396a	chr21: 8986999	chr21: 8987287-8987443(score=389)	Regulation	SRX2420135	level 1	Prostate	H.sapiens
hsa-mir-10396a	chr21: 8986999	chr21: 8987292-8987440(score=432)	Regulation	SRX2420134	level 1	Prostate	H.sapiens
hsa-mir-10396a	chr21: 8986999	chr21: 8987293-8987422(score=232)	Regulation	SRX220075	level 1	Prostate	H.sapiens
hsa-mir-10396a	chr21: 8986999	chr21: 8987298-8987440(score=414)	Regulation	SRX1818075	level 1	Prostate	H.sapiens
hsa-mir-10396a	chr21: 8986999	chr21: 8987302-8987460(score=508)	Regulation	SRX1818073	level 1	Prostate	H.sapiens
hsa-mir-10396a	chr21: 8986999	chr21: 8987327-8987451(score=468)	Regulation	SRX220001	level 1	Prostate	H.sapiens
hsa-mir-10396a	chr21: 8986999	chr21: 8987359-8987430(score=483)	Regulation	SRX1885180	level 1	Prostate	H.sapiens
hsa-mir-10396a	chr21: 8986999	chr21: 8987360-8987414(score=228)	Regulation	SRX220076	level 1	Prostate	H.sapiens
hsa-mir-10396a	chr21: 8986999	chr21: 8987360-8987430(score=511)	Regulation	SRX306518	level 1	Prostate	H.sapiens
hsa-mir-10396a	chr21: 8986999	chr21: 8987361-8987436(score=438)	Regulation	SRX306514	level 1	Prostate	H.sapiens
hsa-mir-10396a	chr21: 8986999	chr21: 8987361-8987442(score=424)	Regulation	SRX2017937	level 1	Prostate	H.sapiens
hsa-mir-10396a	chr21: 8986999	chr21: 8987365-8987430(score=424)	Regulation	SRX1033284	level 1	Prostate	H.sapiens
hsa-mir-10396a	chr21: 8986999	chr21: 8987366-8987443(score=465)	Regulation	SRX306519	level 1	Prostate	H.sapiens
hsa-mir-10396a	chr21: 8986999	chr21: 8987370-8987429(score=291)	Regulation	SRX2420129	level 1	Prostate	H.sapiens
hsa-mir-10396a	chr21: 8986999	chr21: 8987378-8987429(score=383)	Regulation	SRX1885178	level 1	Prostate	H.sapiens
hsa-mir-10396a	chr21: 8986999	chr21: 8987526-8987605(score=233)	Regulation	SRX433196	level 1	Prostate	H.sapiens
hsa-mir-10396a	chr21: 8986999	chr21: 8987887-8987962(score=291)	Regulation	SRX357297	level 1	Prostate	H.sapiens
hsa-mir-10396a	chr21: 8986999	chr21: 8987892-8987961(score=295)	Regulation	SRX357293	level 1	Prostate	H.sapiens
hsa-mir-10396a	chr21: 8986999	chr21: 8987901-8987961(score=254)	Regulation	SRX357292	level 1	Prostate	H.sapiens
hsa-mir-10397	chr5: 10353639(NM_001270660)	chr5: 10353591-10353981(score=566)	Regulation	SRX734411	level 1	Prostate	H.sapiens
hsa-mir-10397	chr5: 10353639(NM_001270660)	chr5: 10353675-10353947(score=531)	Regulation	SRX734410	level 1	Prostate	H.sapiens
hsa-mir-10397	chr5: 10353639(NM_001270660)	chr5: 10353709-10353943(score=280)	Regulation	SRX734409	level 1	Prostate	H.sapiens
hsa-mir-10397	chr5: 10353639(NM_001270661)	chr5: 10353591-10353981(score=566)	Regulation	SRX734411	level 1	Prostate	H.sapiens
hsa-mir-10397	chr5: 10353639(NM_001270661)	chr5: 10353675-10353947(score=531)	Regulation	SRX734410	level 1	Prostate	H.sapiens
hsa-mir-10397	chr5: 10353639(NM_001270661)	chr5: 10353709-10353943(score=280)	Regulation	SRX734409	level 1	Prostate	H.sapiens
hsa-mir-10397	chr5: 10353639(NM_005885)	chr5: 10353591-10353981(score=566)	Regulation	SRX734411	level 1	Prostate	H.sapiens
hsa-mir-10397	chr5: 10353639(NM_005885)	chr5: 10353675-10353947(score=531)	Regulation	SRX734410	level 1	Prostate	H.sapiens
hsa-mir-10397	chr5: 10353639(NM_005885)	chr5: 10353709-10353943(score=280)	Regulation	SRX734409	level 1	Prostate	H.sapiens
hsa-mir-10398	chr6: 41733610	chr6: 41732614-41732798(score=376)	Regulation	SRX433202	level 1	Prostate	H.sapiens
hsa-mir-10398	chr6: 41733610	chr6: 41735569-41735741(score=433)	Regulation	SRX734409	level 1	Prostate	H.sapiens
hsa-mir-10398	chr6: 41733610	chr6: 41735570-41735746(score=627)	Regulation	SRX734411	level 1	Prostate	H.sapiens
hsa-mir-10398	chr6: 41733610	chr6: 41735571-41735737(score=451)	Regulation	SRX734410	level 1	Prostate	H.sapiens
hsa-mir-10398	chr6: 41734401(NM_001271945)	chr6: 41735569-41735741(score=433)	Regulation	SRX734409	level 1	Prostate	H.sapiens
hsa-mir-10398	chr6: 41734401(NM_001271945)	chr6: 41735570-41735746(score=627)	Regulation	SRX734411	level 1	Prostate	H.sapiens
hsa-mir-10398	chr6: 41734401(NM_001271945)	chr6: 41735571-41735737(score=451)	Regulation	SRX734410	level 1	Prostate	H.sapiens
hsa-mir-10398	chr6: 41735060(NM_007162)	chr6: 41735569-41735741(score=433)	Regulation	SRX734409	level 1	Prostate	H.sapiens
hsa-mir-10398	chr6: 41735060(NM_007162)	chr6: 41735570-41735746(score=627)	Regulation	SRX734411	level 1	Prostate	H.sapiens
hsa-mir-10398	chr6: 41735060(NM_007162)	chr6: 41735571-41735737(score=451)	Regulation	SRX734410	level 1	Prostate	H.sapiens
hsa-mir-10398	chr6: 41735527(NM_001271943)	chr6: 41735569-41735741(score=433)	Regulation	SRX734409	level 1	Prostate	H.sapiens
hsa-mir-10398	chr6: 41735527(NM_001271943)	chr6: 41735570-41735746(score=627)	Regulation	SRX734411	level 1	Prostate	H.sapiens
hsa-mir-10398	chr6: 41735527(NM_001271943)	chr6: 41735571-41735737(score=451)	Regulation	SRX734410	level 1	Prostate	H.sapiens
hsa-mir-10398	chr6: 41735527(NM_001271944)	chr6: 41735569-41735741(score=433)	Regulation	SRX734409	level 1	Prostate	H.sapiens
hsa-mir-10398	chr6: 41735527(NM_001271944)	chr6: 41735570-41735746(score=627)	Regulation	SRX734411	level 1	Prostate	H.sapiens
hsa-mir-10398	chr6: 41735527(NM_001271944)	chr6: 41735571-41735737(score=451)	Regulation	SRX734410	level 1	Prostate	H.sapiens
hsa-mir-10398	chr6: 41736259(NM_001167827)	chr6: 41735569-41735741(score=433)	Regulation	SRX734409	level 1	Prostate	H.sapiens
hsa-mir-10398	chr6: 41736259(NM_001167827)	chr6: 41735570-41735746(score=627)	Regulation	SRX734411	level 1	Prostate	H.sapiens
hsa-mir-10398	chr6: 41736259(NM_001167827)	chr6: 41735571-41735737(score=451)	Regulation	SRX734410	level 1	Prostate	H.sapiens
hsa-mir-10399	chr7: 139109719(NM_020119)	chr7: 139111070-139111607(score=1000)	Regulation	SRX595671	level 1	Prostate	H.sapiens
hsa-mir-10399	chr7: 139109719(NM_020119)	chr7: 139111070-139111608(score=1000)	Regulation	SRX1569767	level 1	Prostate	H.sapiens
hsa-mir-10399	chr7: 139109719(NM_020119)	chr7: 139111089-139111563(score=729)	Regulation	SRX595676	level 1	Prostate	H.sapiens
hsa-mir-10399	chr7: 139109719(NM_020119)	chr7: 139111091-139111586(score=1000)	Regulation	SRX1569768	level 1	Prostate	H.sapiens
hsa-mir-10399	chr7: 139109719(NM_020119)	chr7: 139111097-139111521(score=1000)	Regulation	SRX595675	level 1	Prostate	H.sapiens
hsa-mir-10399	chr7: 139109719(NM_020119)	chr7: 139111122-139111547(score=1000)	Regulation	SRX595677	level 1	Prostate	H.sapiens
hsa-mir-10399	chr7: 139109719(NM_020119)	chr7: 139111165-139111502(score=1000)	Regulation	SRX059704	level 1	Prostate	H.sapiens
hsa-mir-10399	chr7: 139109719(NM_020119)	chr7: 139111165-139111534(score=1000)	Regulation	SRX471208	level 1	Prostate	H.sapiens
hsa-mir-10399	chr7: 139109719(NM_020119)	chr7: 139111167-139111517(score=1000)	Regulation	SRX173202	level 1	Prostate	H.sapiens
hsa-mir-10399	chr7: 139109719(NM_020119)	chr7: 139111175-139111494(score=1000)	Regulation	SRX2017926	level 1	Prostate	H.sapiens
hsa-mir-10399	chr7: 139109719(NM_020119)	chr7: 139111176-139111504(score=1000)	Regulation	SRX847034	level 1	Prostate	H.sapiens
hsa-mir-10399	chr7: 139109719(NM_020119)	chr7: 139111176-139111516(score=1000)	Regulation	SRX471850	level 1	Prostate	H.sapiens
hsa-mir-10399	chr7: 139109719(NM_020119)	chr7: 139111177-139111505(score=1000)	Regulation	SRX471849	level 1	Prostate	H.sapiens
hsa-mir-10399	chr7: 139109719(NM_020119)	chr7: 139111184-139111484(score=1000)	Regulation	SRX101130	level 1	Prostate	H.sapiens
hsa-mir-10399	chr7: 139109719(NM_020119)	chr7: 139111184-139111492(score=1000)	Regulation	SRX502070	level 1	Prostate	H.sapiens
hsa-mir-10399	chr7: 139109719(NM_020119)	chr7: 139111187-139111454(score=813)	Regulation	SRX471853	level 1	Prostate	H.sapiens
hsa-mir-10399	chr7: 139109719(NM_020119)	chr7: 139111187-139111488(score=1000)	Regulation	SRX667983	level 1	Prostate	H.sapiens
hsa-mir-10399	chr7: 139109719(NM_020119)	chr7: 139111187-139111492(score=1000)	Regulation	SRX383815	level 1	Prostate	H.sapiens
hsa-mir-10399	chr7: 139109719(NM_020119)	chr7: 139111189-139111447(score=731)	Regulation	SRX471851	level 1	Prostate	H.sapiens
hsa-mir-10399	chr7: 139109719(NM_020119)	chr7: 139111190-139111476(score=672)	Regulation	SRX502072	level 1	Prostate	H.sapiens
hsa-mir-10399	chr7: 139109719(NM_020119)	chr7: 139111190-139111500(score=820)	Regulation	SRX736065	level 1	Prostate	H.sapiens
hsa-mir-10399	chr7: 139109719(NM_020119)	chr7: 139111193-139111443(score=540)	Regulation	SRX502057	level 1	Prostate	H.sapiens
hsa-mir-10399	chr7: 139109719(NM_020119)	chr7: 139111194-139111487(score=1000)	Regulation	SRX101132	level 1	Prostate	H.sapiens
hsa-mir-10399	chr7: 139109719(NM_020119)	chr7: 139111195-139111529(score=1000)	Regulation	SRX847035	level 1	Prostate	H.sapiens
hsa-mir-10399	chr7: 139109719(NM_020119)	chr7: 139111196-139111486(score=999)	Regulation	SRX433201	level 1	Prostate	H.sapiens
hsa-mir-10399	chr7: 139109719(NM_020119)	chr7: 139111200-139111454(score=919)	Regulation	SRX059705	level 1	Prostate	H.sapiens
hsa-mir-10399	chr7: 139109719(NM_020119)	chr7: 139111202-139111468(score=1000)	Regulation	SRX2545040	level 1	Prostate	H.sapiens
hsa-mir-10399	chr7: 139109719(NM_020119)	chr7: 139111203-139111474(score=1000)	Regulation	SRX471855	level 1	Prostate	H.sapiens
hsa-mir-10399	chr7: 139109719(NM_020119)	chr7: 139111203-139111490(score=1000)	Regulation	SRX1818077	level 1	Prostate	H.sapiens
hsa-mir-10399	chr7: 139109719(NM_020119)	chr7: 139111204-139111482(score=1000)	Regulation	SRX667982	level 1	Prostate	H.sapiens
hsa-mir-10399	chr7: 139109719(NM_020119)	chr7: 139111205-139111483(score=790)	Regulation	SRX502063	level 1	Prostate	H.sapiens
hsa-mir-10399	chr7: 139109719(NM_020119)	chr7: 139111208-139111469(score=989)	Regulation	SRX1818075	level 1	Prostate	H.sapiens
hsa-mir-10399	chr7: 139109719(NM_020119)	chr7: 139111209-139111433(score=771)	Regulation	SRX2545038	level 1	Prostate	H.sapiens
hsa-mir-10399	chr7: 139109719(NM_020119)	chr7: 139111213-139111386(score=1000)	Regulation	SRX1950170	level 1	Prostate	H.sapiens
hsa-mir-10399	chr7: 139109719(NM_020119)	chr7: 139111213-139111431(score=1000)	Regulation	SRX1950172	level 1	Prostate	H.sapiens
hsa-mir-10399	chr7: 139109719(NM_020119)	chr7: 139111213-139111455(score=1000)	Regulation	SRX497604	level 1	Prostate	H.sapiens
hsa-mir-10399	chr7: 139109719(NM_020119)	chr7: 139111216-139111454(score=572)	Regulation	SRX736066	level 1	Prostate	H.sapiens
hsa-mir-10399	chr7: 139109719(NM_020119)	chr7: 139111217-139111468(score=1000)	Regulation	SRX1033275	level 1	Prostate	H.sapiens
hsa-mir-10399	chr7: 139109719(NM_020119)	chr7: 139111217-139111473(score=947)	Regulation	SRX1818073	level 1	Prostate	H.sapiens
hsa-mir-10399	chr7: 139109719(NM_020119)	chr7: 139111217-139111481(score=695)	Regulation	SRX502065	level 1	Prostate	H.sapiens
hsa-mir-10399	chr7: 139109719(NM_020119)	chr7: 139111218-139111443(score=595)	Regulation	SRX502067	level 1	Prostate	H.sapiens
hsa-mir-10399	chr7: 139109719(NM_020119)	chr7: 139111218-139111488(score=818)	Regulation	SRX101135	level 1	Prostate	H.sapiens
hsa-mir-10399	chr7: 139109719(NM_020119)	chr7: 139111220-139111407(score=923)	Regulation	SRX1950171	level 1	Prostate	H.sapiens
hsa-mir-10399	chr7: 139109719(NM_020119)	chr7: 139111221-139111429(score=1000)	Regulation	SRX173201	level 1	Prostate	H.sapiens
hsa-mir-10399	chr7: 139109719(NM_020119)	chr7: 139111221-139111431(score=646)	Regulation	SRX497605	level 1	Prostate	H.sapiens
hsa-mir-10399	chr7: 139109719(NM_020119)	chr7: 139111221-139111476(score=706)	Regulation	SRX502059	level 1	Prostate	H.sapiens
hsa-mir-10399	chr7: 139109719(NM_020119)	chr7: 139111222-139111440(score=547)	Regulation	SRX2017927	level 1	Prostate	H.sapiens
hsa-mir-10399	chr7: 139109719(NM_020119)	chr7: 139111222-139111469(score=920)	Regulation	SRX1334494	level 1	Prostate	H.sapiens
hsa-mir-10399	chr7: 139109719(NM_020119)	chr7: 139111223-139111463(score=737)	Regulation	SRX471856	level 1	Prostate	H.sapiens
hsa-mir-10399	chr7: 139109719(NM_020119)	chr7: 139111224-139111439(score=572)	Regulation	SRX433202	level 1	Prostate	H.sapiens
hsa-mir-10399	chr7: 139109719(NM_020119)	chr7: 139111225-139111456(score=458)	Regulation	SRX471852	level 1	Prostate	H.sapiens
hsa-mir-10399	chr7: 139109719(NM_020119)	chr7: 139111225-139111463(score=964)	Regulation	SRX101133	level 1	Prostate	H.sapiens
hsa-mir-10399	chr7: 139109719(NM_020119)	chr7: 139111227-139111394(score=799)	Regulation	SRX1950173	level 1	Prostate	H.sapiens
hsa-mir-10399	chr7: 139109719(NM_020119)	chr7: 139111227-139111484(score=603)	Regulation	SRX502073	level 1	Prostate	H.sapiens
hsa-mir-10399	chr7: 139109719(NM_020119)	chr7: 139111231-139111454(score=679)	Regulation	SRX101137	level 1	Prostate	H.sapiens
hsa-mir-10399	chr7: 139109719(NM_020119)	chr7: 139111232-139111431(score=444)	Regulation	SRX734410	level 1	Prostate	H.sapiens
hsa-mir-10399	chr7: 139109719(NM_020119)	chr7: 139111233-139111375(score=578)	Regulation	SRX470408	level 1	Prostate	H.sapiens
hsa-mir-10399	chr7: 139109719(NM_020119)	chr7: 139111236-139111425(score=634)	Regulation	SRX022570	level 1	Prostate	H.sapiens
hsa-mir-10399	chr7: 139109719(NM_020119)	chr7: 139111237-139111423(score=527)	Regulation	SRX1885176	level 1	Prostate	H.sapiens
hsa-mir-10399	chr7: 139109719(NM_020119)	chr7: 139111237-139111438(score=402)	Regulation	SRX502066	level 1	Prostate	H.sapiens
hsa-mir-10399	chr7: 139109719(NM_020119)	chr7: 139111237-139111467(score=656)	Regulation	SRX1033278	level 1	Prostate	H.sapiens
hsa-mir-10399	chr7: 139109719(NM_020119)	chr7: 139111247-139111359(score=410)	Regulation	SRX1334493	level 1	Prostate	H.sapiens
hsa-mir-10399	chr7: 139109719(NM_020119)	chr7: 139111248-139111409(score=374)	Regulation	SRX502055	level 1	Prostate	H.sapiens
hsa-mir-10399	chr7: 139109719(NM_020119)	chr7: 139111248-139111448(score=802)	Regulation	SRX1334492	level 1	Prostate	H.sapiens
hsa-mir-10399	chr7: 139109719(NM_020119)	chr7: 139111249-139111380(score=473)	Regulation	SRX220080	level 1	Prostate	H.sapiens
hsa-mir-10399	chr7: 139109719(NM_020119)	chr7: 139111251-139111364(score=414)	Regulation	SRX083216	level 1	Prostate	H.sapiens
hsa-mir-10399	chr7: 139109719(NM_020119)	chr7: 139111253-139111453(score=562)	Regulation	SRX1818076	level 1	Prostate	H.sapiens
hsa-mir-10399	chr7: 139109719(NM_020119)	chr7: 139111254-139111427(score=317)	Regulation	SRX173207	level 1	Prostate	H.sapiens
hsa-mir-10399	chr7: 139109719(NM_020119)	chr7: 139111258-139111424(score=598)	Regulation	SRX1885175	level 1	Prostate	H.sapiens
hsa-mir-10399	chr7: 139109719(NM_020119)	chr7: 139111260-139111365(score=437)	Regulation	SRX220079	level 1	Prostate	H.sapiens
hsa-mir-10399	chr7: 139109719(NM_020119)	chr7: 139111267-139111434(score=447)	Regulation	SRX101131	level 1	Prostate	H.sapiens
hsa-mir-10399	chr7: 139109719(NM_020119)	chr7: 139111271-139111378(score=332)	Regulation	SRX736074	level 1	Prostate	H.sapiens
hsa-mir-10399	chr7: 139109719(NM_020119)	chr7: 139111274-139111415(score=303)	Regulation	SRX1885174	level 1	Prostate	H.sapiens
hsa-mir-10399	chr7: 139109719(NM_020119)	chr7: 139111277-139111358(score=347)	Regulation	SRX1334491	level 1	Prostate	H.sapiens
hsa-mir-10399	chr7: 139109719(NM_020119)	chr7: 139111277-139111450(score=549)	Regulation	SRX101136	level 1	Prostate	H.sapiens
hsa-mir-10399	chr7: 139109719(NM_020119)	chr7: 139111286-139111469(score=353)	Regulation	SRX433197	level 1	Prostate	H.sapiens
hsa-mir-10399	chr7: 139109719(NM_020119)	chr7: 139111301-139111428(score=411)	Regulation	SRX101134	level 1	Prostate	H.sapiens
hsa-mir-103a-1	chr5: 168579609(NM_024594)	chr5: 168579524-168579751(score=418)	Regulation	SRX734410	level 1	Prostate	H.sapiens
hsa-mir-103a-1	chr5: 168579609(NM_024594)	chr5: 168579543-168579720(score=353)	Regulation	SRX734412	level 1	Prostate	H.sapiens
hsa-mir-103a-1	chr5: 168579609(NM_024594)	chr5: 168579569-168579792(score=534)	Regulation	SRX734411	level 1	Prostate	H.sapiens
hsa-mir-103a-2	chr20: 3889387	chr20: 3889207-3889407(score=304)	Regulation	SRX734411	level 2	Prostate	H.sapiens
hsa-mir-103a-2	chr20: 3917494	chr20: 3918224-3918481(score=822)	Regulation	SRX847034	level 1	Prostate	H.sapiens
hsa-mir-103a-2	chr20: 3917494	chr20: 3918234-3918478(score=1000)	Regulation	SRX471208	level 1	Prostate	H.sapiens
hsa-mir-103a-2	chr20: 3917494	chr20: 3918244-3918443(score=992)	Regulation	SRX383815	level 1	Prostate	H.sapiens
hsa-mir-103a-2	chr20: 3917494	chr20: 3918248-3918437(score=632)	Regulation	SRX847035	level 1	Prostate	H.sapiens
hsa-mir-103a-2	chr20: 3917494	chr20: 3918284-3918361(score=360)	Regulation	SRX220080	level 1	Prostate	H.sapiens
hsa-mir-103a-2	chr20: 3917494	chr20: 3918293-3918393(score=601)	Regulation	SRX1334494	level 1	Prostate	H.sapiens
hsa-mir-103a-2	chr20: 3917494	chr20: 3918305-3918362(score=373)	Regulation	SRX1334492	level 1	Prostate	H.sapiens
hsa-mir-103a-2	chr20: 3917494	chr20: 3918319-3918349(score=275)	Regulation	SRX220079	level 1	Prostate	H.sapiens
hsa-mir-103b-2	chr20: 3917563	chr20: 3918224-3918481(score=822)	Regulation	SRX847034	level 1	Prostate	H.sapiens
hsa-mir-103b-2	chr20: 3917563	chr20: 3918234-3918478(score=1000)	Regulation	SRX471208	level 1	Prostate	H.sapiens
hsa-mir-103b-2	chr20: 3917563	chr20: 3918244-3918443(score=992)	Regulation	SRX383815	level 1	Prostate	H.sapiens
hsa-mir-103b-2	chr20: 3917563	chr20: 3918248-3918437(score=632)	Regulation	SRX847035	level 1	Prostate	H.sapiens
hsa-mir-103b-2	chr20: 3917563	chr20: 3918284-3918361(score=360)	Regulation	SRX220080	level 1	Prostate	H.sapiens
hsa-mir-103b-2	chr20: 3917563	chr20: 3918293-3918393(score=601)	Regulation	SRX1334494	level 1	Prostate	H.sapiens
hsa-mir-103b-2	chr20: 3917563	chr20: 3918305-3918362(score=373)	Regulation	SRX1334492	level 1	Prostate	H.sapiens
hsa-mir-103b-2	chr20: 3917563	chr20: 3918319-3918349(score=275)	Regulation	SRX220079	level 1	Prostate	H.sapiens
hsa-mir-10400	chr8: 144462539	chr8: 144465265-144465484(score=709)	Regulation	SRX2017936	level 1	Prostate	H.sapiens
hsa-mir-10400	chr8: 144462851(NM_001330618)	chr8: 144465265-144465484(score=709)	Regulation	SRX2017936	level 1	Prostate	H.sapiens
hsa-mir-10400	chr8: 144465035(NM_138496)	chr8: 144465265-144465484(score=709)	Regulation	SRX2017936	level 1	Prostate	H.sapiens
hsa-mir-10522	chr5: 17155992	chr5: 17157958-17158185(score=1000)	Regulation	SRX433197	level 1	Prostate	H.sapiens
hsa-mir-10522	chr5: 17155992	chr5: 17157959-17158366(score=1000)	Regulation	SRX433198	level 1	Prostate	H.sapiens
hsa-mir-10522	chr5: 17155992	chr5: 17157978-17158184(score=962)	Regulation	SRX433201	level 1	Prostate	H.sapiens
hsa-mir-10522	chr5: 17155992	chr5: 17157989-17158166(score=511)	Regulation	SRX433202	level 1	Prostate	H.sapiens
hsa-mir-10522	chr5: 17155992	chr5: 17157990-17158154(score=630)	Regulation	SRX306506	level 1	Prostate	H.sapiens
hsa-mir-10522	chr5: 17155992	chr5: 17158011-17158143(score=567)	Regulation	SRX306516	level 1	Prostate	H.sapiens
hsa-mir-10523	chr5: 172915083	chr5: 172911042-172911225(score=457)	Regulation	SRX433198	level 1	Prostate	H.sapiens
hsa-mir-10526	chr11: 122152308	chr11: 122156421-122156593(score=751)	Regulation	SRX433201	level 1	Prostate	H.sapiens
hsa-mir-10526	chr11: 122156371(NR_137188)	chr11: 122156421-122156593(score=751)	Regulation	SRX433201	level 1	Prostate	H.sapiens
hsa-mir-10526	chr11: 122156371(NR_137194)	chr11: 122156421-122156593(score=751)	Regulation	SRX433201	level 1	Prostate	H.sapiens
hsa-mir-10526	chr11: 122157113(NR_137186)	chr11: 122156421-122156593(score=751)	Regulation	SRX433201	level 1	Prostate	H.sapiens
hsa-mir-10526	chr11: 122157113(NR_137187)	chr11: 122156421-122156593(score=751)	Regulation	SRX433201	level 1	Prostate	H.sapiens
hsa-mir-10526	chr11: 122203109(NR_024430)	chr11: 122203270-122203672(score=1000)	Regulation	SRX433201	level 1	Prostate	H.sapiens
hsa-mir-10526	chr11: 122203109(NR_024430)	chr11: 122203290-122203671(score=735)	Regulation	SRX433198	level 1	Prostate	H.sapiens
hsa-mir-10526	chr11: 122203109(NR_024430)	chr11: 122203334-122203664(score=546)	Regulation	SRX433197	level 1	Prostate	H.sapiens
hsa-mir-10526	chr11: 122203109(NR_024430)	chr11: 122203383-122203683(score=815)	Regulation	SRX433202	level 1	Prostate	H.sapiens
hsa-mir-10526	chr11: 122203109(NR_137181)	chr11: 122203270-122203672(score=1000)	Regulation	SRX433201	level 1	Prostate	H.sapiens
hsa-mir-10526	chr11: 122203109(NR_137181)	chr11: 122203290-122203671(score=735)	Regulation	SRX433198	level 1	Prostate	H.sapiens
hsa-mir-10526	chr11: 122203109(NR_137181)	chr11: 122203334-122203664(score=546)	Regulation	SRX433197	level 1	Prostate	H.sapiens
hsa-mir-10526	chr11: 122203109(NR_137181)	chr11: 122203383-122203683(score=815)	Regulation	SRX433202	level 1	Prostate	H.sapiens
hsa-mir-10526	chr11: 122203109(NR_137182)	chr11: 122203270-122203672(score=1000)	Regulation	SRX433201	level 1	Prostate	H.sapiens
hsa-mir-10526	chr11: 122203109(NR_137182)	chr11: 122203290-122203671(score=735)	Regulation	SRX433198	level 1	Prostate	H.sapiens
hsa-mir-10526	chr11: 122203109(NR_137182)	chr11: 122203334-122203664(score=546)	Regulation	SRX433197	level 1	Prostate	H.sapiens
hsa-mir-10526	chr11: 122203109(NR_137182)	chr11: 122203383-122203683(score=815)	Regulation	SRX433202	level 1	Prostate	H.sapiens
hsa-mir-106a	chrX: 134170278	chrX: 134169790-134169969(score=697)	Regulation	SRX497604	level 1	Prostate	H.sapiens
hsa-mir-106a	chrX: 134170278	chrX: 134169791-134169997(score=660)	Regulation	SRX667982	level 1	Prostate	H.sapiens
hsa-mir-106a	chrX: 134170278	chrX: 134169795-134169990(score=604)	Regulation	SRX1950172	level 1	Prostate	H.sapiens
hsa-mir-106a	chrX: 134170278	chrX: 134169805-134169996(score=700)	Regulation	SRX667983	level 1	Prostate	H.sapiens
hsa-mir-106a	chrX: 134170278	chrX: 134169813-134169968(score=420)	Regulation	SRX173202	level 1	Prostate	H.sapiens
hsa-mir-106b	chr7: 100100780(NM_182776)	chr7: 100100266-100100850(score=1000)	Regulation	SRX595676	level 1	Prostate	H.sapiens
hsa-mir-106b	chr7: 100100780(NM_182776)	chr7: 100100280-100100878(score=1000)	Regulation	SRX1569767	level 1	Prostate	H.sapiens
hsa-mir-106b	chr7: 100100780(NM_182776)	chr7: 100100280-100100878(score=1000)	Regulation	SRX595671	level 1	Prostate	H.sapiens
hsa-mir-106b	chr7: 100100780(NM_182776)	chr7: 100100304-100100887(score=1000)	Regulation	SRX1569768	level 1	Prostate	H.sapiens
hsa-mir-106b	chr7: 100100780(NM_182776)	chr7: 100100318-100100825(score=1000)	Regulation	SRX595675	level 1	Prostate	H.sapiens
hsa-mir-106b	chr7: 100100780(NM_182776)	chr7: 100100318-100100880(score=1000)	Regulation	SRX595677	level 1	Prostate	H.sapiens
hsa-mir-106b	chr7: 100100780(NM_182776)	chr7: 100100389-100100898(score=1000)	Regulation	SRX734410	level 1	Prostate	H.sapiens
hsa-mir-106b	chr7: 100100780(NM_182776)	chr7: 100100414-100100886(score=1000)	Regulation	SRX734409	level 1	Prostate	H.sapiens
hsa-mir-106b	chr7: 100100780(NM_182776)	chr7: 100100432-100100882(score=1000)	Regulation	SRX734411	level 1	Prostate	H.sapiens
hsa-mir-106b	chr7: 100100780(NM_182776)	chr7: 100100432-100100882(score=1000)	Regulation	SRX734412	level 1	Prostate	H.sapiens
hsa-mir-106b	chr7: 100100780(NM_182776)	chr7: 100100440-100100791(score=1000)	Regulation	SRX383815	level 1	Prostate	H.sapiens
hsa-mir-106b	chr7: 100100780(NM_182776)	chr7: 100100449-100100805(score=648)	Regulation	SRX736066	level 1	Prostate	H.sapiens
hsa-mir-106b	chr7: 100100780(NM_182776)	chr7: 100100460-100100696(score=622)	Regulation	SRX471208	level 1	Prostate	H.sapiens
hsa-mir-106b	chr7: 100100780(NM_182776)	chr7: 100100465-100100626(score=534)	Regulation	SRX383816	level 1	Prostate	H.sapiens
hsa-mir-106b	chr7: 100100780(NM_182776)	chr7: 100100470-100100795(score=791)	Regulation	SRX736065	level 1	Prostate	H.sapiens
hsa-mir-106b	chr7: 100100780(NM_182776)	chr7: 100100476-100100789(score=895)	Regulation	SRX1033275	level 1	Prostate	H.sapiens
hsa-mir-106b	chr7: 100100780(NM_182776)	chr7: 100100476-100100843(score=623)	Regulation	SRX595685	level 1	Prostate	H.sapiens
hsa-mir-106b	chr7: 100100780(NM_182776)	chr7: 100100480-100100734(score=585)	Regulation	SRX471849	level 1	Prostate	H.sapiens
hsa-mir-106b	chr7: 100100780(NM_182776)	chr7: 100100485-100100633(score=319)	Regulation	SRX059704	level 1	Prostate	H.sapiens
hsa-mir-106b	chr7: 100100780(NM_182776)	chr7: 100100486-100100736(score=712)	Regulation	SRX736054	level 1	Prostate	H.sapiens
hsa-mir-106b	chr7: 100100780(NM_182776)	chr7: 100100490-100100648(score=384)	Regulation	SRX2017926	level 1	Prostate	H.sapiens
hsa-mir-106b	chr7: 100100780(NM_182776)	chr7: 100100493-100100774(score=441)	Regulation	SRX736074	level 1	Prostate	H.sapiens
hsa-mir-106b	chr7: 100100780(NM_182776)	chr7: 100100496-100100691(score=336)	Regulation	SRX847035	level 1	Prostate	H.sapiens
hsa-mir-106b	chr7: 100100780(NM_182776)	chr7: 100100506-100100765(score=664)	Regulation	SRX471850	level 1	Prostate	H.sapiens
hsa-mir-106b	chr7: 100100780(NM_182776)	chr7: 100100515-100100761(score=601)	Regulation	SRX099183	level 1	Prostate	H.sapiens
hsa-mir-106b	chr7: 100100780(NM_182776)	chr7: 100100520-100100650(score=455)	Regulation	SRX101132	level 1	Prostate	H.sapiens
hsa-mir-106b	chr7: 100100780(NM_182776)	chr7: 100100520-100100753(score=408)	Regulation	SRX173202	level 1	Prostate	H.sapiens
hsa-mir-106b	chr7: 100100780(NM_182776)	chr7: 100100521-100100741(score=423)	Regulation	SRX2545040	level 1	Prostate	H.sapiens
hsa-mir-106b	chr7: 100100780(NM_182776)	chr7: 100100528-100100775(score=678)	Regulation	SRX099182	level 1	Prostate	H.sapiens
hsa-mir-106b	chr7: 100100780(NM_182776)	chr7: 100100531-100100605(score=377)	Regulation	SRX1334494	level 1	Prostate	H.sapiens
hsa-mir-106b	chr7: 100100780(NM_182776)	chr7: 100100537-100100735(score=451)	Regulation	SRX471856	level 1	Prostate	H.sapiens
hsa-mir-106b	chr7: 100100780(NM_182776)	chr7: 100100537-100100750(score=455)	Regulation	SRX847034	level 1	Prostate	H.sapiens
hsa-mir-106b	chr7: 100100780(NM_182776)	chr7: 100100546-100100732(score=446)	Regulation	SRX471855	level 1	Prostate	H.sapiens
hsa-mir-106b	chr7: 100100780(NM_182776)	chr7: 100100554-100100755(score=311)	Regulation	SRX736075	level 1	Prostate	H.sapiens
hsa-mir-106b	chr7: 100100780(NM_182776)	chr7: 100100568-100100694(score=297)	Regulation	SRX220000	level 1	Prostate	H.sapiens
hsa-mir-106b	chr7: 100100780(NM_182776)	chr7: 100100620-100100725(score=257)	Regulation	SRX220001	level 1	Prostate	H.sapiens
hsa-mir-11181	chr15: 87946268	chr15: 87949353-87949612(score=1000)	Regulation	SRX1818073	level 1	Prostate	H.sapiens
hsa-mir-11181	chr15: 87946268	chr15: 87949360-87949582(score=602)	Regulation	SRX736065	level 1	Prostate	H.sapiens
hsa-mir-11181	chr15: 87946268	chr15: 87949366-87949595(score=577)	Regulation	SRX471850	level 1	Prostate	H.sapiens
hsa-mir-11181	chr15: 87946268	chr15: 87949369-87949592(score=803)	Regulation	SRX471208	level 1	Prostate	H.sapiens
hsa-mir-11181	chr15: 87946268	chr15: 87949370-87949606(score=1000)	Regulation	SRX1033275	level 1	Prostate	H.sapiens
hsa-mir-11181	chr15: 87946268	chr15: 87949372-87949568(score=787)	Regulation	SRX1818077	level 1	Prostate	H.sapiens
hsa-mir-11181	chr15: 87946268	chr15: 87949379-87949594(score=616)	Regulation	SRX2545040	level 1	Prostate	H.sapiens
hsa-mir-11181	chr15: 87946268	chr15: 87949384-87949577(score=603)	Regulation	SRX1033278	level 1	Prostate	H.sapiens
hsa-mir-11181	chr15: 87946268	chr15: 87949386-87949599(score=796)	Regulation	SRX173202	level 1	Prostate	H.sapiens
hsa-mir-11181	chr15: 87946268	chr15: 87949393-87949549(score=500)	Regulation	SRX736066	level 1	Prostate	H.sapiens
hsa-mir-11181	chr15: 87946268	chr15: 87949393-87949571(score=462)	Regulation	SRX383815	level 1	Prostate	H.sapiens
hsa-mir-11181	chr15: 87946268	chr15: 87949397-87949588(score=1000)	Regulation	SRX1818075	level 1	Prostate	H.sapiens
hsa-mir-11181	chr15: 87946268	chr15: 87949402-87949535(score=441)	Regulation	SRX470408	level 1	Prostate	H.sapiens
hsa-mir-11181	chr15: 87946268	chr15: 87949406-87949561(score=392)	Regulation	SRX1334494	level 1	Prostate	H.sapiens
hsa-mir-11181	chr15: 87946268	chr15: 87949422-87949608(score=464)	Regulation	SRX2545038	level 1	Prostate	H.sapiens
hsa-mir-11181	chr15: 87946268	chr15: 87949424-87949540(score=457)	Regulation	SRX022570	level 1	Prostate	H.sapiens
hsa-mir-11181	chr15: 87946268	chr15: 87949427-87949568(score=423)	Regulation	SRX497604	level 1	Prostate	H.sapiens
hsa-mir-11181	chr15: 87946268	chr15: 87949427-87949595(score=545)	Regulation	SRX1950172	level 1	Prostate	H.sapiens
hsa-mir-11181	chr15: 87946268	chr15: 87949431-87949585(score=491)	Regulation	SRX1818076	level 1	Prostate	H.sapiens
hsa-mir-11181	chr15: 87946268	chr15: 87949436-87949507(score=308)	Regulation	SRX1334492	level 1	Prostate	H.sapiens
hsa-mir-11181	chr15: 87946268	chr15: 87949447-87949535(score=318)	Regulation	SRX1334493	level 1	Prostate	H.sapiens
hsa-mir-11399	chr1: 112882050	chr1: 112880573-112880822(score=1000)	Regulation	SRX173202	level 1	Prostate	H.sapiens
hsa-mir-11399	chr1: 112882050	chr1: 112880577-112880820(score=818)	Regulation	SRX471208	level 1	Prostate	H.sapiens
hsa-mir-11399	chr1: 112882050	chr1: 112880600-112880769(score=377)	Regulation	SRX667983	level 1	Prostate	H.sapiens
hsa-mir-11399	chr1: 112882050	chr1: 112880600-112880810(score=563)	Regulation	SRX059704	level 1	Prostate	H.sapiens
hsa-mir-11399	chr1: 112882050	chr1: 112880608-112880791(score=528)	Regulation	SRX667982	level 1	Prostate	H.sapiens
hsa-mir-11399	chr1: 112882050	chr1: 112880622-112880786(score=684)	Regulation	SRX1950172	level 1	Prostate	H.sapiens
hsa-mir-11399	chr1: 112882050	chr1: 112880622-112880809(score=350)	Regulation	SRX847034	level 1	Prostate	H.sapiens
hsa-mir-11399	chr1: 112882050	chr1: 112880638-112880778(score=494)	Regulation	SRX1950173	level 1	Prostate	H.sapiens
hsa-mir-11399	chr1: 112882050	chr1: 112880654-112880778(score=461)	Regulation	SRX101132	level 1	Prostate	H.sapiens
hsa-mir-11399	chr1: 112882050	chr1: 112880655-112880763(score=464)	Regulation	SRX173201	level 1	Prostate	H.sapiens
hsa-mir-11399	chr1: 112882050	chr1: 112880658-112880790(score=715)	Regulation	SRX497604	level 1	Prostate	H.sapiens
hsa-mir-11401	chr16: 87853896	chr16: 87854312-87854516(score=554)	Regulation	SRX433197	level 1	Prostate	H.sapiens
hsa-mir-11401	chr16: 87853896	chr16: 87854320-87854515(score=609)	Regulation	SRX433202	level 1	Prostate	H.sapiens
hsa-mir-11401	chr16: 87853896	chr16: 87854324-87854493(score=498)	Regulation	SRX734410	level 1	Prostate	H.sapiens
hsa-mir-11401	chr16: 87853896	chr16: 87854336-87854543(score=719)	Regulation	SRX433201	level 1	Prostate	H.sapiens
hsa-mir-11401	chr16: 87853896	chr16: 87854337-87854547(score=745)	Regulation	SRX433198	level 1	Prostate	H.sapiens
hsa-mir-1178	chr12: 119713724	chr12: 119716511-119717024(score=1000)	Regulation	SRX1569767	level 1	Prostate	H.sapiens
hsa-mir-1178	chr12: 119713724	chr12: 119716515-119717008(score=733)	Regulation	SRX595676	level 1	Prostate	H.sapiens
hsa-mir-1178	chr12: 119713724	chr12: 119716515-119717027(score=839)	Regulation	SRX1569768	level 1	Prostate	H.sapiens
hsa-mir-1178	chr12: 119713724	chr12: 119716516-119717023(score=1000)	Regulation	SRX595671	level 1	Prostate	H.sapiens
hsa-mir-1178	chr12: 119713724	chr12: 119716526-119717003(score=1000)	Regulation	SRX595677	level 1	Prostate	H.sapiens
hsa-mir-1178	chr12: 119713724	chr12: 119716549-119716963(score=802)	Regulation	SRX595675	level 1	Prostate	H.sapiens
hsa-mir-1178	chr12: 119713724	chr12: 119716565-119716971(score=1000)	Regulation	SRX734410	level 1	Prostate	H.sapiens
hsa-mir-1178	chr12: 119713724	chr12: 119716583-119716919(score=1000)	Regulation	SRX847034	level 1	Prostate	H.sapiens
hsa-mir-1178	chr12: 119713724	chr12: 119716589-119716950(score=1000)	Regulation	SRX471850	level 1	Prostate	H.sapiens
hsa-mir-1178	chr12: 119713724	chr12: 119716598-119716916(score=1000)	Regulation	SRX471208	level 1	Prostate	H.sapiens
hsa-mir-1178	chr12: 119713724	chr12: 119716599-119716910(score=815)	Regulation	SRX099183	level 1	Prostate	H.sapiens
hsa-mir-1178	chr12: 119713724	chr12: 119716601-119716953(score=1000)	Regulation	SRX173202	level 1	Prostate	H.sapiens
hsa-mir-1178	chr12: 119713724	chr12: 119716618-119716924(score=1000)	Regulation	SRX734411	level 1	Prostate	H.sapiens
hsa-mir-1178	chr12: 119713724	chr12: 119716620-119716931(score=1000)	Regulation	SRX2017926	level 1	Prostate	H.sapiens
hsa-mir-1178	chr12: 119713724	chr12: 119716622-119716930(score=1000)	Regulation	SRX734412	level 1	Prostate	H.sapiens
hsa-mir-1178	chr12: 119713724	chr12: 119716625-119716985(score=540)	Regulation	SRX595685	level 1	Prostate	H.sapiens
hsa-mir-1178	chr12: 119713724	chr12: 119716626-119716923(score=1000)	Regulation	SRX734409	level 1	Prostate	H.sapiens
hsa-mir-1178	chr12: 119713724	chr12: 119716627-119716959(score=1000)	Regulation	SRX736065	level 1	Prostate	H.sapiens
hsa-mir-1178	chr12: 119713724	chr12: 119716632-119716917(score=1000)	Regulation	SRX471856	level 1	Prostate	H.sapiens
hsa-mir-1178	chr12: 119713724	chr12: 119716633-119716941(score=1000)	Regulation	SRX059704	level 1	Prostate	H.sapiens
hsa-mir-1178	chr12: 119713724	chr12: 119716634-119716920(score=964)	Regulation	SRX099182	level 1	Prostate	H.sapiens
hsa-mir-1178	chr12: 119713724	chr12: 119716635-119716908(score=1000)	Regulation	SRX2545040	level 1	Prostate	H.sapiens
hsa-mir-1178	chr12: 119713724	chr12: 119716635-119716919(score=1000)	Regulation	SRX471849	level 1	Prostate	H.sapiens
hsa-mir-1178	chr12: 119713724	chr12: 119716635-119716921(score=1000)	Regulation	SRX471855	level 1	Prostate	H.sapiens
hsa-mir-1178	chr12: 119713724	chr12: 119716635-119716942(score=1000)	Regulation	SRX433201	level 1	Prostate	H.sapiens
hsa-mir-1178	chr12: 119713724	chr12: 119716641-119716915(score=1000)	Regulation	SRX471851	level 1	Prostate	H.sapiens
hsa-mir-1178	chr12: 119713724	chr12: 119716641-119716929(score=1000)	Regulation	SRX847035	level 1	Prostate	H.sapiens
hsa-mir-1178	chr12: 119713724	chr12: 119716642-119716939(score=1000)	Regulation	SRX471852	level 1	Prostate	H.sapiens
hsa-mir-1178	chr12: 119713724	chr12: 119716644-119716941(score=1000)	Regulation	SRX433197	level 1	Prostate	H.sapiens
hsa-mir-1178	chr12: 119713724	chr12: 119716653-119716825(score=650)	Regulation	SRX2017936	level 1	Prostate	H.sapiens
hsa-mir-1178	chr12: 119713724	chr12: 119716653-119716902(score=1000)	Regulation	SRX2545038	level 1	Prostate	H.sapiens
hsa-mir-1178	chr12: 119713724	chr12: 119716653-119716911(score=1000)	Regulation	SRX383815	level 1	Prostate	H.sapiens
hsa-mir-1178	chr12: 119713724	chr12: 119716653-119716918(score=1000)	Regulation	SRX667982	level 1	Prostate	H.sapiens
hsa-mir-1178	chr12: 119713724	chr12: 119716654-119716880(score=831)	Regulation	SRX502073	level 1	Prostate	H.sapiens
hsa-mir-1178	chr12: 119713724	chr12: 119716654-119716891(score=1000)	Regulation	SRX1818077	level 1	Prostate	H.sapiens
hsa-mir-1178	chr12: 119713724	chr12: 119716654-119716913(score=1000)	Regulation	SRX433198	level 1	Prostate	H.sapiens
hsa-mir-1178	chr12: 119713724	chr12: 119716654-119716917(score=1000)	Regulation	SRX736054	level 1	Prostate	H.sapiens
hsa-mir-1178	chr12: 119713724	chr12: 119716654-119716948(score=1000)	Regulation	SRX433202	level 1	Prostate	H.sapiens
hsa-mir-1178	chr12: 119713724	chr12: 119716655-119716883(score=681)	Regulation	SRX502063	level 1	Prostate	H.sapiens
hsa-mir-1178	chr12: 119713724	chr12: 119716657-119716903(score=995)	Regulation	SRX667983	level 1	Prostate	H.sapiens
hsa-mir-1178	chr12: 119713724	chr12: 119716658-119716913(score=1000)	Regulation	SRX1950172	level 1	Prostate	H.sapiens
hsa-mir-1178	chr12: 119713724	chr12: 119716659-119716902(score=1000)	Regulation	SRX1818073	level 1	Prostate	H.sapiens
hsa-mir-1178	chr12: 119713724	chr12: 119716659-119716914(score=1000)	Regulation	SRX059705	level 1	Prostate	H.sapiens
hsa-mir-1178	chr12: 119713724	chr12: 119716660-119716873(score=601)	Regulation	SRX861680	level 1	Prostate	H.sapiens
hsa-mir-1178	chr12: 119713724	chr12: 119716660-119716887(score=1000)	Regulation	SRX1818075	level 1	Prostate	H.sapiens
hsa-mir-1178	chr12: 119713724	chr12: 119716662-119716935(score=1000)	Regulation	SRX471854	level 1	Prostate	H.sapiens
hsa-mir-1178	chr12: 119713724	chr12: 119716664-119716875(score=1000)	Regulation	SRX101130	level 1	Prostate	H.sapiens
hsa-mir-1178	chr12: 119713724	chr12: 119716665-119716902(score=1000)	Regulation	SRX497604	level 1	Prostate	H.sapiens
hsa-mir-1178	chr12: 119713724	chr12: 119716666-119716889(score=1000)	Regulation	SRX713895	level 1	Prostate	H.sapiens
hsa-mir-1178	chr12: 119713724	chr12: 119716666-119716892(score=1000)	Regulation	SRX1950171	level 1	Prostate	H.sapiens
hsa-mir-1178	chr12: 119713724	chr12: 119716666-119716897(score=1000)	Regulation	SRX1950173	level 1	Prostate	H.sapiens
hsa-mir-1178	chr12: 119713724	chr12: 119716666-119716900(score=853)	Regulation	SRX471853	level 1	Prostate	H.sapiens
hsa-mir-1178	chr12: 119713724	chr12: 119716668-119716917(score=1000)	Regulation	SRX2017927	level 1	Prostate	H.sapiens
hsa-mir-1178	chr12: 119713724	chr12: 119716671-119716887(score=1000)	Regulation	SRX1950170	level 1	Prostate	H.sapiens
hsa-mir-1178	chr12: 119713724	chr12: 119716672-119716887(score=1000)	Regulation	SRX306516	level 1	Prostate	H.sapiens
hsa-mir-1178	chr12: 119713724	chr12: 119716673-119716922(score=1000)	Regulation	SRX176055	level 1	Prostate	H.sapiens
hsa-mir-1178	chr12: 119713724	chr12: 119716677-119716909(score=1000)	Regulation	SRX736066	level 1	Prostate	H.sapiens
hsa-mir-1178	chr12: 119713724	chr12: 119716679-119716881(score=1000)	Regulation	SRX101132	level 1	Prostate	H.sapiens
hsa-mir-1178	chr12: 119713724	chr12: 119716681-119716869(score=597)	Regulation	SRX502070	level 1	Prostate	H.sapiens
hsa-mir-1178	chr12: 119713724	chr12: 119716681-119716877(score=546)	Regulation	SRX502057	level 1	Prostate	H.sapiens
hsa-mir-1178	chr12: 119713724	chr12: 119716686-119716849(score=550)	Regulation	SRX173207	level 1	Prostate	H.sapiens
hsa-mir-1178	chr12: 119713724	chr12: 119716687-119716868(score=686)	Regulation	SRX1818076	level 1	Prostate	H.sapiens
hsa-mir-1178	chr12: 119713724	chr12: 119716687-119716871(score=774)	Regulation	SRX306517	level 1	Prostate	H.sapiens
hsa-mir-1178	chr12: 119713724	chr12: 119716688-119716863(score=974)	Regulation	SRX1334492	level 1	Prostate	H.sapiens
hsa-mir-1178	chr12: 119713724	chr12: 119716688-119716872(score=885)	Regulation	SRX713896	level 1	Prostate	H.sapiens
hsa-mir-1178	chr12: 119713724	chr12: 119716690-119716882(score=631)	Regulation	SRX736074	level 1	Prostate	H.sapiens
hsa-mir-1178	chr12: 119713724	chr12: 119716691-119716860(score=615)	Regulation	SRX220080	level 1	Prostate	H.sapiens
hsa-mir-1178	chr12: 119713724	chr12: 119716691-119716902(score=1000)	Regulation	SRX1033275	level 1	Prostate	H.sapiens
hsa-mir-1178	chr12: 119713724	chr12: 119716692-119716866(score=634)	Regulation	SRX1885175	level 1	Prostate	H.sapiens
hsa-mir-1178	chr12: 119713724	chr12: 119716692-119716874(score=1000)	Regulation	SRX1334494	level 1	Prostate	H.sapiens
hsa-mir-1178	chr12: 119713724	chr12: 119716692-119716895(score=1000)	Regulation	SRX173201	level 1	Prostate	H.sapiens
hsa-mir-1178	chr12: 119713724	chr12: 119716697-119716881(score=895)	Regulation	SRX306506	level 1	Prostate	H.sapiens
hsa-mir-1178	chr12: 119713724	chr12: 119716699-119716860(score=549)	Regulation	SRX306507	level 1	Prostate	H.sapiens
hsa-mir-1178	chr12: 119713724	chr12: 119716700-119716876(score=813)	Regulation	SRX083218	level 1	Prostate	H.sapiens
hsa-mir-1178	chr12: 119713724	chr12: 119716701-119716869(score=652)	Regulation	SRX1885174	level 1	Prostate	H.sapiens
hsa-mir-1178	chr12: 119713724	chr12: 119716704-119716837(score=502)	Regulation	SRX101133	level 1	Prostate	H.sapiens
hsa-mir-1178	chr12: 119713724	chr12: 119716704-119716873(score=828)	Regulation	SRX713894	level 1	Prostate	H.sapiens
hsa-mir-1178	chr12: 119713724	chr12: 119716705-119716884(score=1000)	Regulation	SRX1033278	level 1	Prostate	H.sapiens
hsa-mir-1178	chr12: 119713724	chr12: 119716706-119716860(score=585)	Regulation	SRX1885173	level 1	Prostate	H.sapiens
hsa-mir-1178	chr12: 119713724	chr12: 119716708-119716880(score=1000)	Regulation	SRX022570	level 1	Prostate	H.sapiens
hsa-mir-1178	chr12: 119713724	chr12: 119716711-119716884(score=835)	Regulation	SRX497605	level 1	Prostate	H.sapiens
hsa-mir-1178	chr12: 119713724	chr12: 119716713-119716851(score=547)	Regulation	SRX101135	level 1	Prostate	H.sapiens
hsa-mir-1178	chr12: 119713724	chr12: 119716714-119716850(score=601)	Regulation	SRX470407	level 1	Prostate	H.sapiens
hsa-mir-1178	chr12: 119713724	chr12: 119716717-119716836(score=514)	Regulation	SRX383816	level 1	Prostate	H.sapiens
hsa-mir-1178	chr12: 119713724	chr12: 119716717-119716880(score=910)	Regulation	SRX470408	level 1	Prostate	H.sapiens
hsa-mir-1178	chr12: 119713724	chr12: 119716717-119716885(score=427)	Regulation	SRX220000	level 1	Prostate	H.sapiens
hsa-mir-1178	chr12: 119713724	chr12: 119716718-119716851(score=561)	Regulation	SRX1885176	level 1	Prostate	H.sapiens
hsa-mir-1178	chr12: 119713724	chr12: 119716719-119716862(score=658)	Regulation	SRX083219	level 1	Prostate	H.sapiens
hsa-mir-1178	chr12: 119713724	chr12: 119716720-119716827(score=377)	Regulation	SRX736075	level 1	Prostate	H.sapiens
hsa-mir-1178	chr12: 119713724	chr12: 119716726-119716849(score=539)	Regulation	SRX698193	level 1	Prostate	H.sapiens
hsa-mir-1178	chr12: 119713724	chr12: 119716730-119716857(score=508)	Regulation	SRX083216	level 1	Prostate	H.sapiens
hsa-mir-1178	chr12: 119713724	chr12: 119716731-119716865(score=516)	Regulation	SRX758011	level 1	Prostate	H.sapiens
hsa-mir-1178	chr12: 119713724	chr12: 119716734-119716834(score=405)	Regulation	SRX220079	level 1	Prostate	H.sapiens
hsa-mir-1178	chr12: 119713724	chr12: 119716734-119716853(score=764)	Regulation	SRX1334493	level 1	Prostate	H.sapiens
hsa-mir-1178	chr12: 119713724	chr12: 119716736-119716857(score=769)	Regulation	SRX1640090	level 1	Prostate	H.sapiens
hsa-mir-1178	chr12: 119713724	chr12: 119716739-119716854(score=280)	Regulation	SRX220001	level 1	Prostate	H.sapiens
hsa-mir-1178	chr12: 119713724	chr12: 119716748-119716843(score=408)	Regulation	SRX1640091	level 1	Prostate	H.sapiens
hsa-mir-1178	chr12: 119713724	chr12: 119716761-119716841(score=473)	Regulation	SRX1334491	level 1	Prostate	H.sapiens
hsa-mir-1178	chr12: 119713724	chr12: 119716763-119716825(score=402)	Regulation	SRX2420134	level 1	Prostate	H.sapiens
hsa-mir-1180	chr17: 19344574	chr17: 19346712-19346913(score=837)	Regulation	SRX433201	level 1	Prostate	H.sapiens
hsa-mir-1180	chr17: 19344574	chr17: 19346743-19346927(score=529)	Regulation	SRX433198	level 1	Prostate	H.sapiens
hsa-mir-1180	chr17: 19344574	chr17: 19347689-19347929(score=722)	Regulation	SRX433198	level 1	Prostate	H.sapiens
hsa-mir-1180	chr17: 19344574	chr17: 19347730-19347921(score=423)	Regulation	SRX433201	level 1	Prostate	H.sapiens
hsa-mir-1180	chr17: 19344574	chr17: 19347748-19347981(score=618)	Regulation	SRX306516	level 1	Prostate	H.sapiens
hsa-mir-1183	chr7: 21428034(NM_001326542)	chr7: 21427103-21427475(score=479)	Regulation	SRX734411	level 1	Prostate	H.sapiens
hsa-mir-1183	chr7: 21428034(NM_001326542)	chr7: 21427194-21427490(score=326)	Regulation	SRX734410	level 1	Prostate	H.sapiens
hsa-mir-1183	chr7: 21428034(NM_001326543)	chr7: 21427103-21427475(score=479)	Regulation	SRX734411	level 1	Prostate	H.sapiens
hsa-mir-1183	chr7: 21428034(NM_001326543)	chr7: 21427194-21427490(score=326)	Regulation	SRX734410	level 1	Prostate	H.sapiens
hsa-mir-1183	chr7: 21428034(NM_003112)	chr7: 21427103-21427475(score=479)	Regulation	SRX734411	level 1	Prostate	H.sapiens
hsa-mir-1183	chr7: 21428034(NM_003112)	chr7: 21427194-21427490(score=326)	Regulation	SRX734410	level 1	Prostate	H.sapiens
hsa-mir-1185-1	chr14: 101042977	chr14: 101040759-101041161(score=1000)	Regulation	SRX433198	level 1	Prostate	H.sapiens
hsa-mir-1185-1	chr14: 101042977	chr14: 101040794-101041140(score=531)	Regulation	SRX1569767	level 1	Prostate	H.sapiens
hsa-mir-1185-1	chr14: 101042977	chr14: 101040796-101041139(score=523)	Regulation	SRX595671	level 1	Prostate	H.sapiens
hsa-mir-1185-1	chr14: 101042977	chr14: 101040808-101041161(score=1000)	Regulation	SRX433197	level 1	Prostate	H.sapiens
hsa-mir-1185-1	chr14: 101042977	chr14: 101040822-101041142(score=1000)	Regulation	SRX433201	level 1	Prostate	H.sapiens
hsa-mir-1185-1	chr14: 101042977	chr14: 101040823-101041115(score=1000)	Regulation	SRX433202	level 1	Prostate	H.sapiens
hsa-mir-1185-1	chr14: 101042977	chr14: 101040824-101041193(score=1000)	Regulation	SRX471208	level 1	Prostate	H.sapiens
hsa-mir-1185-1	chr14: 101042977	chr14: 101040825-101041127(score=1000)	Regulation	SRX173202	level 1	Prostate	H.sapiens
hsa-mir-1185-1	chr14: 101042977	chr14: 101040828-101041080(score=1000)	Regulation	SRX667983	level 1	Prostate	H.sapiens
hsa-mir-1185-1	chr14: 101042977	chr14: 101040829-101041105(score=1000)	Regulation	SRX2017926	level 1	Prostate	H.sapiens
hsa-mir-1185-1	chr14: 101042977	chr14: 101040835-101041160(score=1000)	Regulation	SRX099182	level 1	Prostate	H.sapiens
hsa-mir-1185-1	chr14: 101042977	chr14: 101040840-101041108(score=1000)	Regulation	SRX847035	level 1	Prostate	H.sapiens
hsa-mir-1185-1	chr14: 101042977	chr14: 101040841-101041117(score=704)	Regulation	SRX099183	level 1	Prostate	H.sapiens
hsa-mir-1185-1	chr14: 101042977	chr14: 101040842-101041042(score=1000)	Regulation	SRX1950173	level 1	Prostate	H.sapiens
hsa-mir-1185-1	chr14: 101042977	chr14: 101040846-101041083(score=1000)	Regulation	SRX1950172	level 1	Prostate	H.sapiens
hsa-mir-1185-1	chr14: 101042977	chr14: 101040849-101041053(score=582)	Regulation	SRX059704	level 1	Prostate	H.sapiens
hsa-mir-1185-1	chr14: 101042977	chr14: 101040849-101041086(score=923)	Regulation	SRX667982	level 1	Prostate	H.sapiens
hsa-mir-1185-1	chr14: 101042977	chr14: 101040849-101041164(score=686)	Regulation	SRX847034	level 1	Prostate	H.sapiens
hsa-mir-1185-1	chr14: 101042977	chr14: 101040852-101041070(score=752)	Regulation	SRX2545040	level 1	Prostate	H.sapiens
hsa-mir-1185-1	chr14: 101042977	chr14: 101040852-101041093(score=1000)	Regulation	SRX1033275	level 1	Prostate	H.sapiens
hsa-mir-1185-1	chr14: 101042977	chr14: 101040852-101041103(score=747)	Regulation	SRX736065	level 1	Prostate	H.sapiens
hsa-mir-1185-1	chr14: 101042977	chr14: 101040852-101041106(score=1000)	Regulation	SRX497604	level 1	Prostate	H.sapiens
hsa-mir-1185-1	chr14: 101042977	chr14: 101040854-101041046(score=634)	Regulation	SRX1950171	level 1	Prostate	H.sapiens
hsa-mir-1185-1	chr14: 101042977	chr14: 101040866-101041015(score=647)	Regulation	SRX497605	level 1	Prostate	H.sapiens
hsa-mir-1185-1	chr14: 101042977	chr14: 101040867-101041084(score=1000)	Regulation	SRX173201	level 1	Prostate	H.sapiens
hsa-mir-1185-1	chr14: 101042977	chr14: 101040878-101041053(score=509)	Regulation	SRX736066	level 1	Prostate	H.sapiens
hsa-mir-1185-1	chr14: 101042977	chr14: 101040879-101041025(score=507)	Regulation	SRX1950170	level 1	Prostate	H.sapiens
hsa-mir-1185-1	chr14: 101042977	chr14: 101040880-101041063(score=430)	Regulation	SRX022570	level 1	Prostate	H.sapiens
hsa-mir-1185-1	chr14: 101042977	chr14: 101040885-101041099(score=549)	Regulation	SRX736054	level 1	Prostate	H.sapiens
hsa-mir-1185-1	chr14: 101042977	chr14: 101040894-101041088(score=503)	Regulation	SRX736074	level 1	Prostate	H.sapiens
hsa-mir-1185-1	chr14: 101042977	chr14: 101040896-101041020(score=437)	Regulation	SRX1334492	level 1	Prostate	H.sapiens
hsa-mir-1185-1	chr14: 101042977	chr14: 101040910-101041007(score=460)	Regulation	SRX1334494	level 1	Prostate	H.sapiens
hsa-mir-1185-1	chr14: 101042977	chr14: 101040914-101041043(score=306)	Regulation	SRX1818073	level 1	Prostate	H.sapiens
hsa-mir-1185-1	chr14: 101042977	chr14: 101040916-101041108(score=345)	Regulation	SRX502063	level 1	Prostate	H.sapiens
hsa-mir-1185-1	chr14: 101042977	chr14: 101040918-101041035(score=361)	Regulation	SRX1033278	level 1	Prostate	H.sapiens
hsa-mir-1185-2	chr14: 101044198	chr14: 101040759-101041161(score=1000)	Regulation	SRX433198	level 1	Prostate	H.sapiens
hsa-mir-1185-2	chr14: 101044198	chr14: 101040794-101041140(score=531)	Regulation	SRX1569767	level 1	Prostate	H.sapiens
hsa-mir-1185-2	chr14: 101044198	chr14: 101040796-101041139(score=523)	Regulation	SRX595671	level 1	Prostate	H.sapiens
hsa-mir-1185-2	chr14: 101044198	chr14: 101040808-101041161(score=1000)	Regulation	SRX433197	level 1	Prostate	H.sapiens
hsa-mir-1185-2	chr14: 101044198	chr14: 101040822-101041142(score=1000)	Regulation	SRX433201	level 1	Prostate	H.sapiens
hsa-mir-1185-2	chr14: 101044198	chr14: 101040823-101041115(score=1000)	Regulation	SRX433202	level 1	Prostate	H.sapiens
hsa-mir-1185-2	chr14: 101044198	chr14: 101040824-101041193(score=1000)	Regulation	SRX471208	level 1	Prostate	H.sapiens
hsa-mir-1185-2	chr14: 101044198	chr14: 101040825-101041127(score=1000)	Regulation	SRX173202	level 1	Prostate	H.sapiens
hsa-mir-1185-2	chr14: 101044198	chr14: 101040828-101041080(score=1000)	Regulation	SRX667983	level 1	Prostate	H.sapiens
hsa-mir-1185-2	chr14: 101044198	chr14: 101040829-101041105(score=1000)	Regulation	SRX2017926	level 1	Prostate	H.sapiens
hsa-mir-1185-2	chr14: 101044198	chr14: 101040835-101041160(score=1000)	Regulation	SRX099182	level 1	Prostate	H.sapiens
hsa-mir-1185-2	chr14: 101044198	chr14: 101040840-101041108(score=1000)	Regulation	SRX847035	level 1	Prostate	H.sapiens
hsa-mir-1185-2	chr14: 101044198	chr14: 101040841-101041117(score=704)	Regulation	SRX099183	level 1	Prostate	H.sapiens
hsa-mir-1185-2	chr14: 101044198	chr14: 101040842-101041042(score=1000)	Regulation	SRX1950173	level 1	Prostate	H.sapiens
hsa-mir-1185-2	chr14: 101044198	chr14: 101040846-101041083(score=1000)	Regulation	SRX1950172	level 1	Prostate	H.sapiens
hsa-mir-1185-2	chr14: 101044198	chr14: 101040849-101041053(score=582)	Regulation	SRX059704	level 1	Prostate	H.sapiens
hsa-mir-1185-2	chr14: 101044198	chr14: 101040849-101041086(score=923)	Regulation	SRX667982	level 1	Prostate	H.sapiens
hsa-mir-1185-2	chr14: 101044198	chr14: 101040849-101041164(score=686)	Regulation	SRX847034	level 1	Prostate	H.sapiens
hsa-mir-1185-2	chr14: 101044198	chr14: 101040852-101041070(score=752)	Regulation	SRX2545040	level 1	Prostate	H.sapiens
hsa-mir-1185-2	chr14: 101044198	chr14: 101040852-101041093(score=1000)	Regulation	SRX1033275	level 1	Prostate	H.sapiens
hsa-mir-1185-2	chr14: 101044198	chr14: 101040852-101041103(score=747)	Regulation	SRX736065	level 1	Prostate	H.sapiens
hsa-mir-1185-2	chr14: 101044198	chr14: 101040852-101041106(score=1000)	Regulation	SRX497604	level 1	Prostate	H.sapiens
hsa-mir-1185-2	chr14: 101044198	chr14: 101040854-101041046(score=634)	Regulation	SRX1950171	level 1	Prostate	H.sapiens
hsa-mir-1185-2	chr14: 101044198	chr14: 101040866-101041015(score=647)	Regulation	SRX497605	level 1	Prostate	H.sapiens
hsa-mir-1185-2	chr14: 101044198	chr14: 101040867-101041084(score=1000)	Regulation	SRX173201	level 1	Prostate	H.sapiens
hsa-mir-1185-2	chr14: 101044198	chr14: 101040878-101041053(score=509)	Regulation	SRX736066	level 1	Prostate	H.sapiens
hsa-mir-1185-2	chr14: 101044198	chr14: 101040879-101041025(score=507)	Regulation	SRX1950170	level 1	Prostate	H.sapiens
hsa-mir-1185-2	chr14: 101044198	chr14: 101040880-101041063(score=430)	Regulation	SRX022570	level 1	Prostate	H.sapiens
hsa-mir-1185-2	chr14: 101044198	chr14: 101040885-101041099(score=549)	Regulation	SRX736054	level 1	Prostate	H.sapiens
hsa-mir-1185-2	chr14: 101044198	chr14: 101040894-101041088(score=503)	Regulation	SRX736074	level 1	Prostate	H.sapiens
hsa-mir-1185-2	chr14: 101044198	chr14: 101040896-101041020(score=437)	Regulation	SRX1334492	level 1	Prostate	H.sapiens
hsa-mir-1185-2	chr14: 101044198	chr14: 101040910-101041007(score=460)	Regulation	SRX1334494	level 1	Prostate	H.sapiens
hsa-mir-1185-2	chr14: 101044198	chr14: 101040914-101041043(score=306)	Regulation	SRX1818073	level 1	Prostate	H.sapiens
hsa-mir-1185-2	chr14: 101044198	chr14: 101040916-101041108(score=345)	Regulation	SRX502063	level 1	Prostate	H.sapiens
hsa-mir-1185-2	chr14: 101044198	chr14: 101040918-101041035(score=361)	Regulation	SRX1033278	level 1	Prostate	H.sapiens
hsa-mir-1199	chr19: 14073009(NM_001291291)	chr19: 14073437-14073656(score=374)	Regulation	SRX734410	level 1	Prostate	H.sapiens
hsa-mir-1199	chr19: 14073009(NM_001291291)	chr19: 14073456-14073634(score=400)	Regulation	SRX734411	level 1	Prostate	H.sapiens
hsa-mir-1199	chr19: 14073009(NM_001291291)	chr19: 14073464-14073604(score=311)	Regulation	SRX734412	level 1	Prostate	H.sapiens
hsa-mir-1199	chr19: 14073009(NM_001291291)	chr19: 14073736-14073898(score=831)	Regulation	SRX2017936	level 1	Prostate	H.sapiens
hsa-mir-1199	chr19: 14073009(NM_001291291)	chr19: 14073775-14073841(score=352)	Regulation	SRX2017937	level 1	Prostate	H.sapiens
hsa-mir-1199	chr19: 14073009(NR_111941)	chr19: 14073437-14073656(score=374)	Regulation	SRX734410	level 1	Prostate	H.sapiens
hsa-mir-1199	chr19: 14073009(NR_111941)	chr19: 14073456-14073634(score=400)	Regulation	SRX734411	level 1	Prostate	H.sapiens
hsa-mir-1199	chr19: 14073009(NR_111941)	chr19: 14073464-14073604(score=311)	Regulation	SRX734412	level 1	Prostate	H.sapiens
hsa-mir-1199	chr19: 14073009(NR_111941)	chr19: 14073736-14073898(score=831)	Regulation	SRX2017936	level 1	Prostate	H.sapiens
hsa-mir-1199	chr19: 14073009(NR_111941)	chr19: 14073775-14073841(score=352)	Regulation	SRX2017937	level 1	Prostate	H.sapiens
hsa-mir-1199	chr19: 14073361	chr19: 14073437-14073656(score=374)	Regulation	SRX734410	level 1	Prostate	H.sapiens
hsa-mir-1199	chr19: 14073361	chr19: 14073456-14073634(score=400)	Regulation	SRX734411	level 1	Prostate	H.sapiens
hsa-mir-1199	chr19: 14073361	chr19: 14073464-14073604(score=311)	Regulation	SRX734412	level 1	Prostate	H.sapiens
hsa-mir-1199	chr19: 14073361	chr19: 14073736-14073898(score=831)	Regulation	SRX2017936	level 1	Prostate	H.sapiens
hsa-mir-1199	chr19: 14073361	chr19: 14073775-14073841(score=352)	Regulation	SRX2017937	level 1	Prostate	H.sapiens
hsa-mir-1200	chr7: 37448864	chr7: 37448836-37449004(score=337)	Regulation	SRX734410	level 2	Prostate	H.sapiens
hsa-mir-1200	chr7: 37448864	chr7: 37448840-37449006(score=488)	Regulation	SRX734411	level 2	Prostate	H.sapiens
hsa-mir-1202	chr6: 155946797	chr6: 155942495-155942724(score=914)	Regulation	SRX471208	level 1	Prostate	H.sapiens
hsa-mir-1202	chr6: 155946797	chr6: 155942516-155942778(score=1000)	Regulation	SRX734410	level 1	Prostate	H.sapiens
hsa-mir-1202	chr6: 155946797	chr6: 155942517-155942733(score=712)	Regulation	SRX667983	level 1	Prostate	H.sapiens
hsa-mir-1202	chr6: 155946797	chr6: 155942522-155942692(score=443)	Regulation	SRX667982	level 1	Prostate	H.sapiens
hsa-mir-1202	chr6: 155946797	chr6: 155942525-155942745(score=1000)	Regulation	SRX383815	level 1	Prostate	H.sapiens
hsa-mir-1202	chr6: 155946797	chr6: 155942528-155942734(score=700)	Regulation	SRX059704	level 1	Prostate	H.sapiens
hsa-mir-1202	chr6: 155946797	chr6: 155942545-155942697(score=655)	Regulation	SRX101132	level 1	Prostate	H.sapiens
hsa-mir-1202	chr6: 155946797	chr6: 155942547-155942711(score=851)	Regulation	SRX101130	level 1	Prostate	H.sapiens
hsa-mir-1202	chr6: 155946797	chr6: 155942626-155942674(score=408)	Regulation	SRX220080	level 1	Prostate	H.sapiens
hsa-mir-1203	chr17: 48156511	chr17: 48160583-48161073(score=1000)	Regulation	SRX734410	level 1	Prostate	H.sapiens
hsa-mir-1203	chr17: 48156511	chr17: 48160618-48161051(score=1000)	Regulation	SRX734411	level 1	Prostate	H.sapiens
hsa-mir-1203	chr17: 48156511	chr17: 48160629-48161052(score=1000)	Regulation	SRX734412	level 1	Prostate	H.sapiens
hsa-mir-1203	chr17: 48156511	chr17: 48160630-48161009(score=1000)	Regulation	SRX734409	level 1	Prostate	H.sapiens
hsa-mir-1203	chr17: 48156511	chr17: 48160678-48160943(score=1000)	Regulation	SRX173202	level 1	Prostate	H.sapiens
hsa-mir-1203	chr17: 48156511	chr17: 48160703-48160890(score=477)	Regulation	SRX101137	level 1	Prostate	H.sapiens
hsa-mir-1203	chr17: 48156511	chr17: 48160727-48160901(score=496)	Regulation	SRX101130	level 1	Prostate	H.sapiens
hsa-mir-1203	chr17: 48156511	chr17: 48160730-48160867(score=432)	Regulation	SRX101132	level 1	Prostate	H.sapiens
hsa-mir-1204	chr8: 127794541	chr8: 127794339-127794606(score=604)	Regulation	SRX734410	level 2	Prostate	H.sapiens
hsa-mir-1204	chr8: 127794541	chr8: 127794356-127794609(score=584)	Regulation	SRX734411	level 2	Prostate	H.sapiens
hsa-mir-1204	chr8: 127794541	chr8: 127794357-127794602(score=462)	Regulation	SRX734412	level 2	Prostate	H.sapiens
hsa-mir-1204	chr8: 127794541	chr8: 127794401-127794583(score=518)	Regulation	SRX734409	level 2	Prostate	H.sapiens
hsa-mir-1204	chr8: 127795962	chr8: 127796036-127796147(score=453)	Regulation	SRX306516	level 1	Prostate	H.sapiens
hsa-mir-1205	chr8: 127794533(NR_003367)	chr8: 127794339-127794606(score=604)	Regulation	SRX734410	level 1	Prostate	H.sapiens
hsa-mir-1205	chr8: 127794533(NR_003367)	chr8: 127794356-127794609(score=584)	Regulation	SRX734411	level 1	Prostate	H.sapiens
hsa-mir-1205	chr8: 127794533(NR_003367)	chr8: 127794357-127794602(score=462)	Regulation	SRX734412	level 1	Prostate	H.sapiens
hsa-mir-1205	chr8: 127794533(NR_003367)	chr8: 127794401-127794583(score=518)	Regulation	SRX734409	level 1	Prostate	H.sapiens
hsa-mir-1206	chr8: 127794533(NR_003367)	chr8: 127794339-127794606(score=604)	Regulation	SRX734410	level 1	Prostate	H.sapiens
hsa-mir-1206	chr8: 127794533(NR_003367)	chr8: 127794356-127794609(score=584)	Regulation	SRX734411	level 1	Prostate	H.sapiens
hsa-mir-1206	chr8: 127794533(NR_003367)	chr8: 127794357-127794602(score=462)	Regulation	SRX734412	level 1	Prostate	H.sapiens
hsa-mir-1206	chr8: 127794533(NR_003367)	chr8: 127794401-127794583(score=518)	Regulation	SRX734409	level 1	Prostate	H.sapiens
hsa-mir-1206	chr8: 128008898	chr8: 128009582-128009773(score=493)	Regulation	SRX667982	level 1	Prostate	H.sapiens
hsa-mir-1206	chr8: 128008898	chr8: 128009621-128009783(score=494)	Regulation	SRX173202	level 1	Prostate	H.sapiens
hsa-mir-1206	chr8: 128008898	chr8: 128009625-128009738(score=386)	Regulation	SRX497604	level 1	Prostate	H.sapiens
hsa-mir-1207	chr8: 127794533(NR_003367)	chr8: 127794339-127794606(score=604)	Regulation	SRX734410	level 1	Prostate	H.sapiens
hsa-mir-1207	chr8: 127794533(NR_003367)	chr8: 127794356-127794609(score=584)	Regulation	SRX734411	level 1	Prostate	H.sapiens
hsa-mir-1207	chr8: 127794533(NR_003367)	chr8: 127794357-127794602(score=462)	Regulation	SRX734412	level 1	Prostate	H.sapiens
hsa-mir-1207	chr8: 127794533(NR_003367)	chr8: 127794401-127794583(score=518)	Regulation	SRX734409	level 1	Prostate	H.sapiens
hsa-mir-12115	chr4: 22515312	chr4: 22516071-22516202(score=341)	Regulation	SRX734411	level 1	Prostate	H.sapiens
hsa-mir-12117	chr9: 33108692	chr9: 33106891-33107158(score=1000)	Regulation	SRX433201	level 1	Prostate	H.sapiens
hsa-mir-12117	chr9: 33108692	chr9: 33106921-33107097(score=454)	Regulation	SRX433202	level 1	Prostate	H.sapiens
hsa-mir-12117	chr9: 33108692	chr9: 33106923-33107142(score=515)	Regulation	SRX433198	level 1	Prostate	H.sapiens
hsa-mir-12119	chr7: 99408978(NM_003910)	chr7: 99408733-99408877(score=268)	Regulation	SRX734409	level 1	Prostate	H.sapiens
hsa-mir-12119	chr7: 99409172	chr7: 99408733-99408877(score=268)	Regulation	SRX734409	level 1	Prostate	H.sapiens
hsa-mir-12122	chr20: 49863859	chr20: 49861140-49861289(score=510)	Regulation	SRX1950171	level 1	Prostate	H.sapiens
hsa-mir-12122	chr20: 49863859	chr20: 49861150-49861280(score=594)	Regulation	SRX497604	level 1	Prostate	H.sapiens
hsa-mir-12127	chr3: 10248493(NM_014760)	chr3: 10248337-10248578(score=306)	Regulation	SRX734411	level 1	Prostate	H.sapiens
hsa-mir-12132	chr1: 61742466(NM_001350145)	chr1: 61742280-61742426(score=248)	Regulation	SRX734410	level 1	Prostate	H.sapiens
hsa-mir-12132	chr1: 61742466(NM_176877)	chr1: 61742280-61742426(score=248)	Regulation	SRX734410	level 1	Prostate	H.sapiens
hsa-mir-12133	chr1: 94543702	chr1: 94544200-94544379(score=707)	Regulation	SRX433201	level 1	Prostate	H.sapiens
hsa-mir-12133	chr1: 94543702	chr1: 94544213-94544390(score=538)	Regulation	SRX433198	level 1	Prostate	H.sapiens
hsa-mir-12135	chr15: 73052484(NM_001172623)	chr15: 73049181-73049345(score=510)	Regulation	SRX173202	level 1	Prostate	H.sapiens
hsa-mir-12135	chr15: 73052484(NM_001172624)	chr15: 73049181-73049345(score=510)	Regulation	SRX173202	level 1	Prostate	H.sapiens
hsa-mir-12135	chr15: 73052484(NM_002499)	chr15: 73049181-73049345(score=510)	Regulation	SRX173202	level 1	Prostate	H.sapiens
hsa-mir-12136	chr1: 632685	chr1: 631877-632047(score=415)	Regulation	SRX220090	level 1	Prostate	H.sapiens
hsa-mir-12136	chr1: 632685	chr1: 631882-632375(score=547)	Regulation	SRX847033	level 1	Prostate	H.sapiens
hsa-mir-12136	chr1: 632685	chr1: 631886-632401(score=542)	Regulation	SRX847034	level 1	Prostate	H.sapiens
hsa-mir-12136	chr1: 632685	chr1: 631894-632281(score=594)	Regulation	SRX142907	level 1	Prostate	H.sapiens
hsa-mir-12136	chr1: 632685	chr1: 631894-632356(score=697)	Regulation	SRX847035	level 1	Prostate	H.sapiens
hsa-mir-12136	chr1: 632685	chr1: 631895-632079(score=452)	Regulation	SRX433197	level 1	Prostate	H.sapiens
hsa-mir-12136	chr1: 632685	chr1: 631896-632287(score=394)	Regulation	SRX502072	level 1	Prostate	H.sapiens
hsa-mir-12136	chr1: 632685	chr1: 631896-632343(score=608)	Regulation	SRX471207	level 1	Prostate	H.sapiens
hsa-mir-12136	chr1: 632685	chr1: 631897-632079(score=510)	Regulation	SRX433198	level 1	Prostate	H.sapiens
hsa-mir-12136	chr1: 632685	chr1: 631897-632351(score=690)	Regulation	SRX471208	level 1	Prostate	H.sapiens
hsa-mir-12136	chr1: 632685	chr1: 631900-632075(score=461)	Regulation	SRX433202	level 1	Prostate	H.sapiens
hsa-mir-12136	chr1: 632685	chr1: 631905-632069(score=340)	Regulation	SRX502057	level 1	Prostate	H.sapiens
hsa-mir-12136	chr1: 632685	chr1: 631907-632077(score=407)	Regulation	SRX502070	level 1	Prostate	H.sapiens
hsa-mir-12136	chr1: 632685	chr1: 631908-632056(score=455)	Regulation	SRX1033278	level 1	Prostate	H.sapiens
hsa-mir-12136	chr1: 632685	chr1: 631909-632077(score=378)	Regulation	SRX433201	level 1	Prostate	H.sapiens
hsa-mir-12136	chr1: 632685	chr1: 631912-632057(score=300)	Regulation	SRX1640091	level 1	Prostate	H.sapiens
hsa-mir-12136	chr1: 632685	chr1: 631912-632071(score=426)	Regulation	SRX502063	level 1	Prostate	H.sapiens
hsa-mir-12136	chr1: 632685	chr1: 631913-632068(score=480)	Regulation	SRX470408	level 1	Prostate	H.sapiens
hsa-mir-12136	chr1: 632685	chr1: 631913-632279(score=592)	Regulation	SRX1033267	level 1	Prostate	H.sapiens
hsa-mir-12136	chr1: 632685	chr1: 631914-632052(score=367)	Regulation	SRX383816	level 1	Prostate	H.sapiens
hsa-mir-12136	chr1: 632685	chr1: 631914-632054(score=324)	Regulation	SRX1640090	level 1	Prostate	H.sapiens
hsa-mir-12136	chr1: 632685	chr1: 631915-632046(score=296)	Regulation	SRX220094	level 1	Prostate	H.sapiens
hsa-mir-12136	chr1: 632685	chr1: 631917-632040(score=287)	Regulation	SRX220093	level 1	Prostate	H.sapiens
hsa-mir-12136	chr1: 632685	chr1: 631917-632056(score=419)	Regulation	SRX1885176	level 1	Prostate	H.sapiens
hsa-mir-12136	chr1: 632685	chr1: 631917-632619(score=744)	Regulation	SRX847032	level 1	Prostate	H.sapiens
hsa-mir-12136	chr1: 632685	chr1: 631918-632041(score=339)	Regulation	SRX220087	level 1	Prostate	H.sapiens
hsa-mir-12136	chr1: 632685	chr1: 631918-632071(score=461)	Regulation	SRX1033275	level 1	Prostate	H.sapiens
hsa-mir-12136	chr1: 632685	chr1: 631919-632074(score=407)	Regulation	SRX502073	level 1	Prostate	H.sapiens
hsa-mir-12136	chr1: 632685	chr1: 631920-632038(score=431)	Regulation	SRX220089	level 1	Prostate	H.sapiens
hsa-mir-12136	chr1: 632685	chr1: 631920-632190(score=419)	Regulation	SRX595677	level 1	Prostate	H.sapiens
hsa-mir-12136	chr1: 632685	chr1: 631922-632031(score=208)	Regulation	SRX2420128	level 1	Prostate	H.sapiens
hsa-mir-12136	chr1: 632685	chr1: 631922-632043(score=332)	Regulation	SRX220088	level 1	Prostate	H.sapiens
hsa-mir-12136	chr1: 632685	chr1: 631922-632062(score=412)	Regulation	SRX502071	level 1	Prostate	H.sapiens
hsa-mir-12136	chr1: 632685	chr1: 631923-632077(score=423)	Regulation	SRX306506	level 1	Prostate	H.sapiens
hsa-mir-12136	chr1: 632685	chr1: 631924-632260(score=689)	Regulation	SRX758011	level 1	Prostate	H.sapiens
hsa-mir-12136	chr1: 632685	chr1: 631925-632058(score=424)	Regulation	SRX306516	level 1	Prostate	H.sapiens
hsa-mir-12136	chr1: 632685	chr1: 631925-632064(score=442)	Regulation	SRX470407	level 1	Prostate	H.sapiens
hsa-mir-12136	chr1: 632685	chr1: 631928-632065(score=396)	Regulation	SRX383815	level 1	Prostate	H.sapiens
hsa-mir-12136	chr1: 632685	chr1: 631928-632293(score=553)	Regulation	SRX176056	level 1	Prostate	H.sapiens
hsa-mir-12136	chr1: 632685	chr1: 631930-632062(score=448)	Regulation	SRX306507	level 1	Prostate	H.sapiens
hsa-mir-12136	chr1: 632685	chr1: 631932-631985(score=212)	Regulation	SRX433196	level 1	Prostate	H.sapiens
hsa-mir-12136	chr1: 632685	chr1: 631934-632035(score=253)	Regulation	SRX220086	level 1	Prostate	H.sapiens
hsa-mir-12136	chr1: 632685	chr1: 631936-632079(score=337)	Regulation	SRX173201	level 1	Prostate	H.sapiens
hsa-mir-12136	chr1: 632685	chr1: 631938-632227(score=433)	Regulation	SRX882954	level 1	Prostate	H.sapiens
hsa-mir-12136	chr1: 632685	chr1: 631939-632074(score=356)	Regulation	SRX502061	level 1	Prostate	H.sapiens
hsa-mir-12136	chr1: 632685	chr1: 631941-632066(score=401)	Regulation	SRX306508	level 1	Prostate	H.sapiens
hsa-mir-12136	chr1: 632685	chr1: 631942-632273(score=573)	Regulation	SRX147605	level 1	Prostate	H.sapiens
hsa-mir-12136	chr1: 632685	chr1: 631943-632046(score=304)	Regulation	SRX698191	level 1	Prostate	H.sapiens
hsa-mir-12136	chr1: 632685	chr1: 631949-632053(score=222)	Regulation	SRX2420129	level 1	Prostate	H.sapiens
hsa-mir-12136	chr1: 632685	chr1: 631960-632275(score=646)	Regulation	SRX698190	level 1	Prostate	H.sapiens
hsa-mir-12136	chr1: 632685	chr1: 631969-632292(score=387)	Regulation	SRX1818073	level 1	Prostate	H.sapiens
hsa-mir-12136	chr1: 632685	chr1: 631991-632266(score=332)	Regulation	SRX502059	level 1	Prostate	H.sapiens
hsa-mir-12136	chr1: 632685	chr1: 632024-632276(score=373)	Regulation	SRX176055	level 1	Prostate	H.sapiens
hsa-mir-12136	chr1: 632685	chr1: 632026-632215(score=256)	Regulation	SRX502065	level 1	Prostate	H.sapiens
hsa-mir-12136	chr1: 632685	chr1: 632116-632273(score=532)	Regulation	SRX1033269	level 1	Prostate	H.sapiens
hsa-mir-12136	chr1: 632685	chr1: 632122-632241(score=340)	Regulation	SRX736065	level 1	Prostate	H.sapiens
hsa-mir-12136	chr1: 632685	chr1: 632126-632275(score=683)	Regulation	SRX1033266	level 1	Prostate	H.sapiens
hsa-mir-12136	chr1: 632685	chr1: 632128-632272(score=613)	Regulation	SRX142906	level 1	Prostate	H.sapiens
hsa-mir-12136	chr1: 632685	chr1: 632129-632282(score=354)	Regulation	SRX1885175	level 1	Prostate	H.sapiens
hsa-mir-12136	chr1: 632685	chr1: 632134-632271(score=705)	Regulation	SRX470407	level 1	Prostate	H.sapiens
hsa-mir-12136	chr1: 632685	chr1: 632136-632269(score=437)	Regulation	SRX736066	level 1	Prostate	H.sapiens
hsa-mir-12136	chr1: 632685	chr1: 632136-632276(score=274)	Regulation	SRX502061	level 1	Prostate	H.sapiens
hsa-mir-12136	chr1: 632685	chr1: 632137-632268(score=593)	Regulation	SRX470408	level 1	Prostate	H.sapiens
hsa-mir-12136	chr1: 632685	chr1: 632138-632277(score=383)	Regulation	SRX1885176	level 1	Prostate	H.sapiens
hsa-mir-12136	chr1: 632685	chr1: 632139-632279(score=501)	Regulation	SRX1033275	level 1	Prostate	H.sapiens
hsa-mir-12136	chr1: 632685	chr1: 632144-632282(score=280)	Regulation	SRX502073	level 1	Prostate	H.sapiens
hsa-mir-12136	chr1: 632685	chr1: 632146-632275(score=551)	Regulation	SRX1033278	level 1	Prostate	H.sapiens
hsa-mir-12136	chr1: 632685	chr1: 632148-632255(score=567)	Regulation	SRX698191	level 1	Prostate	H.sapiens
hsa-mir-12136	chr1: 632685	chr1: 632149-632268(score=690)	Regulation	SRX698193	level 1	Prostate	H.sapiens
hsa-mir-12136	chr1: 632685	chr1: 632154-632259(score=563)	Regulation	SRX698192	level 1	Prostate	H.sapiens
hsa-mir-12136	chr1: 632685	chr1: 632154-632267(score=309)	Regulation	SRX1033281	level 1	Prostate	H.sapiens
hsa-mir-12136	chr1: 632685	chr1: 632155-632245(score=438)	Regulation	SRX022569	level 1	Prostate	H.sapiens
hsa-mir-12136	chr1: 632685	chr1: 632155-632267(score=369)	Regulation	SRX1640090	level 1	Prostate	H.sapiens
hsa-mir-12136	chr1: 632685	chr1: 632157-632236(score=384)	Regulation	SRX1033284	level 1	Prostate	H.sapiens
hsa-mir-12136	chr1: 632685	chr1: 632158-632268(score=317)	Regulation	SRX1640091	level 1	Prostate	H.sapiens
hsa-mir-12136	chr1: 632685	chr1: 632159-632230(score=248)	Regulation	SRX1885180	level 1	Prostate	H.sapiens
hsa-mir-12136	chr1: 632685	chr1: 632163-632266(score=377)	Regulation	SRX383816	level 1	Prostate	H.sapiens
hsa-mir-12136	chr1: 632685	chr1: 632164-632222(score=225)	Regulation	SRX2420132	level 1	Prostate	H.sapiens
hsa-mir-12136	chr1: 632685	chr1: 632167-632231(score=274)	Regulation	SRX1885177	level 1	Prostate	H.sapiens
hsa-mir-12136	chr1: 632685	chr1: 632172-632233(score=254)	Regulation	SRX1885179	level 1	Prostate	H.sapiens
hsa-mir-12136	chr1: 632685	chr1: 632173-632232(score=215)	Regulation	SRX1885178	level 1	Prostate	H.sapiens
hsa-mir-12136	chr1: 632685	chr1: 632494-632684(score=389)	Regulation	SRX847034	level 1	Prostate	H.sapiens
hsa-mir-12136	chr1: 632685	chr1: 632532-632682(score=351)	Regulation	SRX502070	level 1	Prostate	H.sapiens
hsa-mir-12136	chr1: 632685	chr1: 632564-632637(score=273)	Regulation	SRX220094	level 1	Prostate	H.sapiens
hsa-mir-12136	chr1: 632685	chr1: 632566-632640(score=281)	Regulation	SRX220093	level 1	Prostate	H.sapiens
hsa-mir-12136	chr1: 632685	chr1: 633426-633502(score=333)	Regulation	SRX220093	level 1	Prostate	H.sapiens
hsa-mir-12136	chr1: 632685	chr1: 633916-634195(score=418)	Regulation	SRX847034	level 1	Prostate	H.sapiens
hsa-mir-12136	chr1: 632685	chr1: 633923-634174(score=515)	Regulation	SRX433198	level 1	Prostate	H.sapiens
hsa-mir-12136	chr1: 632685	chr1: 633926-634211(score=414)	Regulation	SRX595677	level 1	Prostate	H.sapiens
hsa-mir-12136	chr1: 632685	chr1: 633930-634674(score=434)	Regulation	SRX847032	level 1	Prostate	H.sapiens
hsa-mir-12136	chr1: 632685	chr1: 633931-634182(score=435)	Regulation	SRX847033	level 1	Prostate	H.sapiens
hsa-mir-12136	chr1: 632685	chr1: 633931-634182(score=488)	Regulation	SRX847035	level 1	Prostate	H.sapiens
hsa-mir-12136	chr1: 632685	chr1: 633932-634068(score=396)	Regulation	SRX383815	level 1	Prostate	H.sapiens
hsa-mir-12136	chr1: 632685	chr1: 633934-634100(score=489)	Regulation	SRX471208	level 1	Prostate	H.sapiens
hsa-mir-12136	chr1: 632685	chr1: 633935-634096(score=452)	Regulation	SRX433197	level 1	Prostate	H.sapiens
hsa-mir-12136	chr1: 632685	chr1: 633936-634049(score=403)	Regulation	SRX220085	level 1	Prostate	H.sapiens
hsa-mir-12136	chr1: 632685	chr1: 633939-634090(score=329)	Regulation	SRX502066	level 1	Prostate	H.sapiens
hsa-mir-12136	chr1: 632685	chr1: 633939-634091(score=338)	Regulation	SRX433201	level 1	Prostate	H.sapiens
hsa-mir-12136	chr1: 632685	chr1: 633940-634050(score=337)	Regulation	SRX220086	level 1	Prostate	H.sapiens
hsa-mir-12136	chr1: 632685	chr1: 633940-634057(score=325)	Regulation	SRX220094	level 1	Prostate	H.sapiens
hsa-mir-12136	chr1: 632685	chr1: 633940-634065(score=457)	Regulation	SRX1033275	level 1	Prostate	H.sapiens
hsa-mir-12136	chr1: 632685	chr1: 633941-634053(score=364)	Regulation	SRX383816	level 1	Prostate	H.sapiens
hsa-mir-12136	chr1: 632685	chr1: 633941-634096(score=355)	Regulation	SRX502070	level 1	Prostate	H.sapiens
hsa-mir-12136	chr1: 632685	chr1: 633942-634060(score=333)	Regulation	SRX220093	level 1	Prostate	H.sapiens
hsa-mir-12136	chr1: 632685	chr1: 633944-634052(score=391)	Regulation	SRX220088	level 1	Prostate	H.sapiens
hsa-mir-12136	chr1: 632685	chr1: 633944-634054(score=296)	Regulation	SRX220084	level 1	Prostate	H.sapiens
hsa-mir-12136	chr1: 632685	chr1: 633946-634056(score=269)	Regulation	SRX220083	level 1	Prostate	H.sapiens
hsa-mir-12136	chr1: 632685	chr1: 633947-634053(score=375)	Regulation	SRX220087	level 1	Prostate	H.sapiens
hsa-mir-12136	chr1: 632685	chr1: 633947-634062(score=432)	Regulation	SRX1033278	level 1	Prostate	H.sapiens
hsa-mir-12136	chr1: 632685	chr1: 633948-634044(score=359)	Regulation	SRX220090	level 1	Prostate	H.sapiens
hsa-mir-12136	chr1: 632685	chr1: 633948-634052(score=420)	Regulation	SRX220089	level 1	Prostate	H.sapiens
hsa-mir-12136	chr1: 632685	chr1: 633948-634061(score=720)	Regulation	SRX758011	level 1	Prostate	H.sapiens
hsa-mir-12136	chr1: 632685	chr1: 633951-634055(score=288)	Regulation	SRX1640091	level 1	Prostate	H.sapiens
hsa-mir-12136	chr1: 632685	chr1: 633951-634055(score=426)	Regulation	SRX470408	level 1	Prostate	H.sapiens
hsa-mir-12136	chr1: 632685	chr1: 633953-634056(score=323)	Regulation	SRX1640090	level 1	Prostate	H.sapiens
hsa-mir-12136	chr1: 632685	chr1: 634381-634571(score=362)	Regulation	SRX847033	level 1	Prostate	H.sapiens
hsa-mir-12136	chr1: 632685	chr1: 634388-634574(score=378)	Regulation	SRX847035	level 1	Prostate	H.sapiens
hsa-mir-12136	chr1: 632685	chr1: 634402-634582(score=458)	Regulation	SRX471207	level 1	Prostate	H.sapiens
hsa-mir-12136	chr1: 632685	chr1: 634431-634649(score=902)	Regulation	SRX734409	level 1	Prostate	H.sapiens
hsa-mir-12136	chr1: 632685	chr1: 634441-634639(score=780)	Regulation	SRX734410	level 1	Prostate	H.sapiens
hsa-mir-12136	chr1: 632685	chr1: 634444-634645(score=845)	Regulation	SRX734412	level 1	Prostate	H.sapiens
hsa-mir-12136	chr1: 632685	chr1: 634455-634629(score=958)	Regulation	SRX734411	level 1	Prostate	H.sapiens
hsa-mir-1226	chr3: 47825015	chr3: 47824877-47825056(score=417)	Regulation	SRX734412	level 2	Prostate	H.sapiens
hsa-mir-1226	chr3: 47825015	chr3: 47824887-47825102(score=537)	Regulation	SRX734410	level 2	Prostate	H.sapiens
hsa-mir-1226	chr3: 47825015	chr3: 47824889-47825077(score=475)	Regulation	SRX734411	level 2	Prostate	H.sapiens
hsa-mir-1226	chr3: 47825015	chr3: 47824924-47825104(score=422)	Regulation	SRX734409	level 2	Prostate	H.sapiens
hsa-mir-1229	chr5: 179806866	chr5: 179806845-179807013(score=445)	Regulation	SRX734409	level 2	Prostate	H.sapiens
hsa-mir-1229	chr5: 179806866	chr5: 179806856-179807026(score=403)	Regulation	SRX734410	level 2	Prostate	H.sapiens
hsa-mir-1229	chr5: 179806866	chr5: 179806874-179807018(score=521)	Regulation	SRX734411	level 2	Prostate	H.sapiens
hsa-mir-122b	chr18: 58451152	chr18: 58454024-58454273(score=508)	Regulation	SRX433198	level 1	Prostate	H.sapiens
hsa-mir-122b	chr18: 58451152	chr18: 58454029-58454252(score=324)	Regulation	SRX433202	level 1	Prostate	H.sapiens
hsa-mir-122b	chr18: 58451152	chr18: 58454036-58454271(score=513)	Regulation	SRX433201	level 1	Prostate	H.sapiens
hsa-mir-122b	chr18: 58451152	chr18: 58454067-58454267(score=379)	Regulation	SRX433197	level 1	Prostate	H.sapiens
hsa-mir-122b	chr18: 58451152	chr18: 58454123-58454314(score=715)	Regulation	SRX173202	level 1	Prostate	H.sapiens
hsa-mir-122b	chr18: 58451152	chr18: 58454143-58454313(score=462)	Regulation	SRX471849	level 1	Prostate	H.sapiens
hsa-mir-122b	chr18: 58451152	chr18: 58454166-58454280(score=402)	Regulation	SRX497604	level 1	Prostate	H.sapiens
hsa-mir-122b	chr18: 58451152	chr18: 58454167-58454297(score=497)	Regulation	SRX306516	level 1	Prostate	H.sapiens
hsa-mir-122b	chr18: 58451152	chr18: 58455593-58455897(score=933)	Regulation	SRX433201	level 1	Prostate	H.sapiens
hsa-mir-122b	chr18: 58451152	chr18: 58455615-58455869(score=683)	Regulation	SRX433197	level 1	Prostate	H.sapiens
hsa-mir-122b	chr18: 58451152	chr18: 58455621-58455855(score=855)	Regulation	SRX433198	level 1	Prostate	H.sapiens
hsa-mir-122b	chr18: 58451152	chr18: 58455633-58455877(score=888)	Regulation	SRX433202	level 1	Prostate	H.sapiens
hsa-mir-122b	chr18: 58451152	chr18: 58455658-58455783(score=357)	Regulation	SRX306516	level 1	Prostate	H.sapiens
hsa-mir-122b	chr18: 58451152	chr18: 58455658-58455837(score=447)	Regulation	SRX306506	level 1	Prostate	H.sapiens
hsa-mir-1233-1	chr15: 34583635	chr15: 34583578-34583790(score=1000)	Regulation	SRX2017936	level 2	Prostate	H.sapiens
hsa-mir-1233-1	chr15: 34583635	chr15: 34583595-34583737(score=543)	Regulation	SRX2017937	level 2	Prostate	H.sapiens
hsa-mir-1233-2	chr15: 34583635	chr15: 34583578-34583790(score=1000)	Regulation	SRX2017936	level 2	Prostate	H.sapiens
hsa-mir-1233-2	chr15: 34583635	chr15: 34583595-34583737(score=543)	Regulation	SRX2017937	level 2	Prostate	H.sapiens
hsa-mir-1234	chr8: 144409349(NM_013291)	chr8: 144409239-144409459(score=775)	Regulation	SRX734410	level 1	Prostate	H.sapiens
hsa-mir-1234	chr8: 144409349(NM_013291)	chr8: 144409241-144409464(score=775)	Regulation	SRX734412	level 1	Prostate	H.sapiens
hsa-mir-1234	chr8: 144409349(NM_013291)	chr8: 144409242-144409475(score=831)	Regulation	SRX734411	level 1	Prostate	H.sapiens
hsa-mir-1234	chr8: 144409349(NM_013291)	chr8: 144409247-144409485(score=654)	Regulation	SRX734409	level 1	Prostate	H.sapiens
hsa-mir-1236	chr6: 31958962	chr6: 31958964-31959220(score=392)	Regulation	SRX734411	level 2	Prostate	H.sapiens
hsa-mir-1236	chr6: 31956940	chr6: 31959144-31959446(score=602)	Regulation	SRX2017936	level 1	Prostate	H.sapiens
hsa-mir-1236	chr6: 31959087(NM_002904)	chr6: 31959144-31959446(score=602)	Regulation	SRX2017936	level 1	Prostate	H.sapiens
hsa-mir-1237	chr11: 64359171	chr11: 64359071-64359222(score=266)	Regulation	SRX734410	level 2	Prostate	H.sapiens
hsa-mir-1237	chr11: 64359153(NM_001006944)	chr11: 64358053-64358202(score=450)	Regulation	SRX433201	level 1	Prostate	H.sapiens
hsa-mir-1237	chr11: 64359153(NM_001300802)	chr11: 64358053-64358202(score=450)	Regulation	SRX433201	level 1	Prostate	H.sapiens
hsa-mir-1237	chr11: 64359153(NM_001318361)	chr11: 64358053-64358202(score=450)	Regulation	SRX433201	level 1	Prostate	H.sapiens
hsa-mir-1237	chr11: 64359153(NM_003942)	chr11: 64358053-64358202(score=450)	Regulation	SRX433201	level 1	Prostate	H.sapiens
hsa-mir-1244-1	chr2: 231713314	chr2: 231710350-231710493(score=496)	Regulation	SRX734411	level 1	Prostate	H.sapiens
hsa-mir-1245a	chr2: 188978092	chr2: 188976420-188976751(score=1000)	Regulation	SRX433198	level 1	Prostate	H.sapiens
hsa-mir-1245a	chr2: 188978092	chr2: 188976445-188976763(score=1000)	Regulation	SRX433201	level 1	Prostate	H.sapiens
hsa-mir-1245a	chr2: 188978092	chr2: 188976457-188976735(score=771)	Regulation	SRX433197	level 1	Prostate	H.sapiens
hsa-mir-1245a	chr2: 188978092	chr2: 188976459-188976683(score=782)	Regulation	SRX667983	level 1	Prostate	H.sapiens
hsa-mir-1245a	chr2: 188978092	chr2: 188976463-188976757(score=1000)	Regulation	SRX433202	level 1	Prostate	H.sapiens
hsa-mir-1245a	chr2: 188978092	chr2: 188976472-188976699(score=676)	Regulation	SRX173202	level 1	Prostate	H.sapiens
hsa-mir-1245a	chr2: 188978092	chr2: 188976487-188976707(score=529)	Regulation	SRX667982	level 1	Prostate	H.sapiens
hsa-mir-1245a	chr2: 188978092	chr2: 188976491-188976677(score=719)	Regulation	SRX1950172	level 1	Prostate	H.sapiens
hsa-mir-1245a	chr2: 188978092	chr2: 188976498-188976671(score=502)	Regulation	SRX497604	level 1	Prostate	H.sapiens
hsa-mir-1246	chr2: 176601052	chr2: 176604150-176604383(score=1000)	Regulation	SRX471208	level 1	Prostate	H.sapiens
hsa-mir-1246	chr2: 176601052	chr2: 176604159-176604382(score=1000)	Regulation	SRX173202	level 1	Prostate	H.sapiens
hsa-mir-1246	chr2: 176601052	chr2: 176604166-176604388(score=929)	Regulation	SRX059704	level 1	Prostate	H.sapiens
hsa-mir-1246	chr2: 176601052	chr2: 176604188-176604365(score=621)	Regulation	SRX471855	level 1	Prostate	H.sapiens
hsa-mir-1246	chr2: 176601052	chr2: 176604208-176604333(score=492)	Regulation	SRX101137	level 1	Prostate	H.sapiens
hsa-mir-1246	chr2: 176601052	chr2: 176604208-176604361(score=464)	Regulation	SRX502073	level 1	Prostate	H.sapiens
hsa-mir-1246	chr2: 176601052	chr2: 176604209-176604353(score=734)	Regulation	SRX101130	level 1	Prostate	H.sapiens
hsa-mir-1246	chr2: 176601052	chr2: 176604211-176604356(score=681)	Regulation	SRX101132	level 1	Prostate	H.sapiens
hsa-mir-1246	chr2: 176601052	chr2: 176604213-176604349(score=639)	Regulation	SRX497604	level 1	Prostate	H.sapiens
hsa-mir-1246	chr2: 176601052	chr2: 176604215-176604326(score=497)	Regulation	SRX101135	level 1	Prostate	H.sapiens
hsa-mir-1246	chr2: 176601052	chr2: 176604232-176604353(score=473)	Regulation	SRX101133	level 1	Prostate	H.sapiens
hsa-mir-1248	chr3: 186783572(NM_001967)	chr3: 186783168-186783353(score=520)	Regulation	SRX734411	level 1	Prostate	H.sapiens
hsa-mir-1248	chr3: 186783572(NM_001967)	chr3: 186783177-186783372(score=530)	Regulation	SRX734409	level 1	Prostate	H.sapiens
hsa-mir-1248	chr3: 186783572(NM_001967)	chr3: 186783180-186783384(score=637)	Regulation	SRX734410	level 1	Prostate	H.sapiens
hsa-mir-1248	chr3: 186783572(NM_001967)	chr3: 186783193-186783371(score=440)	Regulation	SRX734412	level 1	Prostate	H.sapiens
hsa-mir-1248	chr3: 186786672	chr3: 186783168-186783353(score=520)	Regulation	SRX734411	level 1	Prostate	H.sapiens
hsa-mir-1248	chr3: 186786672	chr3: 186783177-186783372(score=530)	Regulation	SRX734409	level 1	Prostate	H.sapiens
hsa-mir-1248	chr3: 186786672	chr3: 186783180-186783384(score=637)	Regulation	SRX734410	level 1	Prostate	H.sapiens
hsa-mir-1248	chr3: 186786672	chr3: 186783193-186783371(score=440)	Regulation	SRX734412	level 1	Prostate	H.sapiens
hsa-mir-1249	chr22: 45201019	chr22: 45200988-45201146(score=489)	Regulation	SRX433201	level 1	Prostate	H.sapiens
hsa-mir-1251	chr12: 97462776(NR_152618)	chr12: 97462698-97462874(score=421)	Regulation	SRX173202	level 1	Prostate	H.sapiens
hsa-mir-1251	chr12: 97465020(NR_024037)	chr12: 97462698-97462874(score=421)	Regulation	SRX173202	level 1	Prostate	H.sapiens
hsa-mir-1252	chr12: 79419257	chr12: 79414447-79414683(score=546)	Regulation	SRX173202	level 1	Prostate	H.sapiens
hsa-mir-1252	chr12: 79419257	chr12: 79414503-79414629(score=321)	Regulation	SRX101130	level 1	Prostate	H.sapiens
hsa-mir-1252	chr12: 79419257	chr12: 79415850-79416011(score=665)	Regulation	SRX2017936	level 1	Prostate	H.sapiens
hsa-mir-1253	chr17: 2748182	chr17: 2749883-2750022(score=452)	Regulation	SRX734411	level 1	Prostate	H.sapiens
hsa-mir-1253	chr17: 2749441(NM_001355573)	chr17: 2749883-2750022(score=452)	Regulation	SRX734411	level 1	Prostate	H.sapiens
hsa-mir-1255a	chr4: 101347471(NM_000944)	chr4: 101349529-101349778(score=776)	Regulation	SRX173202	level 1	Prostate	H.sapiens
hsa-mir-1255a	chr4: 101347471(NM_000944)	chr4: 101349633-101349771(score=293)	Regulation	SRX734410	level 1	Prostate	H.sapiens
hsa-mir-1255a	chr4: 101347471(NM_001130691)	chr4: 101349529-101349778(score=776)	Regulation	SRX173202	level 1	Prostate	H.sapiens
hsa-mir-1255a	chr4: 101347471(NM_001130691)	chr4: 101349633-101349771(score=293)	Regulation	SRX734410	level 1	Prostate	H.sapiens
hsa-mir-1255a	chr4: 101347471(NM_001130692)	chr4: 101349529-101349778(score=776)	Regulation	SRX173202	level 1	Prostate	H.sapiens
hsa-mir-1255a	chr4: 101347471(NM_001130692)	chr4: 101349633-101349771(score=293)	Regulation	SRX734410	level 1	Prostate	H.sapiens
hsa-mir-1255b-2	chr1: 167936696	chr1: 167936489-167936665(score=630)	Regulation	SRX2017936	level 2	Prostate	H.sapiens
hsa-mir-1255b-2	chr1: 167936696	chr1: 167936527-167936660(score=520)	Regulation	SRX2017937	level 2	Prostate	H.sapiens
hsa-mir-1255b-2	chr1: 167936239(NM_001349774)	chr1: 167932810-167932989(score=557)	Regulation	SRX471208	level 1	Prostate	H.sapiens
hsa-mir-1255b-2	chr1: 167936239(NM_001349774)	chr1: 167935217-167935392(score=572)	Regulation	SRX2017936	level 1	Prostate	H.sapiens
hsa-mir-1255b-2	chr1: 167936239(NM_001349774)	chr1: 167935955-167936163(score=418)	Regulation	SRX734412	level 1	Prostate	H.sapiens
hsa-mir-1255b-2	chr1: 167936239(NM_001349774)	chr1: 167935975-167936219(score=582)	Regulation	SRX734411	level 1	Prostate	H.sapiens
hsa-mir-1255b-2	chr1: 167936239(NM_001349778)	chr1: 167932810-167932989(score=557)	Regulation	SRX471208	level 1	Prostate	H.sapiens
hsa-mir-1255b-2	chr1: 167936239(NM_001349778)	chr1: 167935217-167935392(score=572)	Regulation	SRX2017936	level 1	Prostate	H.sapiens
hsa-mir-1255b-2	chr1: 167936239(NM_001349778)	chr1: 167935955-167936163(score=418)	Regulation	SRX734412	level 1	Prostate	H.sapiens
hsa-mir-1255b-2	chr1: 167936239(NM_001349778)	chr1: 167935975-167936219(score=582)	Regulation	SRX734411	level 1	Prostate	H.sapiens
hsa-mir-1255b-2	chr1: 167936559(NM_001017977)	chr1: 167932810-167932989(score=557)	Regulation	SRX471208	level 1	Prostate	H.sapiens
hsa-mir-1255b-2	chr1: 167936559(NM_001017977)	chr1: 167935217-167935392(score=572)	Regulation	SRX2017936	level 1	Prostate	H.sapiens
hsa-mir-1255b-2	chr1: 167936559(NM_001017977)	chr1: 167935955-167936163(score=418)	Regulation	SRX734412	level 1	Prostate	H.sapiens
hsa-mir-1255b-2	chr1: 167936559(NM_001017977)	chr1: 167935975-167936219(score=582)	Regulation	SRX734411	level 1	Prostate	H.sapiens
hsa-mir-1255b-2	chr1: 167936559(NM_001198956)	chr1: 167932810-167932989(score=557)	Regulation	SRX471208	level 1	Prostate	H.sapiens
hsa-mir-1255b-2	chr1: 167936559(NM_001198956)	chr1: 167935217-167935392(score=572)	Regulation	SRX2017936	level 1	Prostate	H.sapiens
hsa-mir-1255b-2	chr1: 167936559(NM_001198956)	chr1: 167935955-167936163(score=418)	Regulation	SRX734412	level 1	Prostate	H.sapiens
hsa-mir-1255b-2	chr1: 167936559(NM_001198956)	chr1: 167935975-167936219(score=582)	Regulation	SRX734411	level 1	Prostate	H.sapiens
hsa-mir-1255b-2	chr1: 167936559(NM_001198957)	chr1: 167932810-167932989(score=557)	Regulation	SRX471208	level 1	Prostate	H.sapiens
hsa-mir-1255b-2	chr1: 167936559(NM_001198957)	chr1: 167935217-167935392(score=572)	Regulation	SRX2017936	level 1	Prostate	H.sapiens
hsa-mir-1255b-2	chr1: 167936559(NM_001198957)	chr1: 167935955-167936163(score=418)	Regulation	SRX734412	level 1	Prostate	H.sapiens
hsa-mir-1255b-2	chr1: 167936559(NM_001198957)	chr1: 167935975-167936219(score=582)	Regulation	SRX734411	level 1	Prostate	H.sapiens
hsa-mir-1255b-2	chr1: 167936559(NM_001349773)	chr1: 167932810-167932989(score=557)	Regulation	SRX471208	level 1	Prostate	H.sapiens
hsa-mir-1255b-2	chr1: 167936559(NM_001349773)	chr1: 167935217-167935392(score=572)	Regulation	SRX2017936	level 1	Prostate	H.sapiens
hsa-mir-1255b-2	chr1: 167936559(NM_001349773)	chr1: 167935955-167936163(score=418)	Regulation	SRX734412	level 1	Prostate	H.sapiens
hsa-mir-1255b-2	chr1: 167936559(NM_001349773)	chr1: 167935975-167936219(score=582)	Regulation	SRX734411	level 1	Prostate	H.sapiens
hsa-mir-1255b-2	chr1: 167936559(NM_001349775)	chr1: 167932810-167932989(score=557)	Regulation	SRX471208	level 1	Prostate	H.sapiens
hsa-mir-1255b-2	chr1: 167936559(NM_001349775)	chr1: 167935217-167935392(score=572)	Regulation	SRX2017936	level 1	Prostate	H.sapiens
hsa-mir-1255b-2	chr1: 167936559(NM_001349775)	chr1: 167935955-167936163(score=418)	Regulation	SRX734412	level 1	Prostate	H.sapiens
hsa-mir-1255b-2	chr1: 167936559(NM_001349775)	chr1: 167935975-167936219(score=582)	Regulation	SRX734411	level 1	Prostate	H.sapiens
hsa-mir-1255b-2	chr1: 167936559(NM_001349776)	chr1: 167932810-167932989(score=557)	Regulation	SRX471208	level 1	Prostate	H.sapiens
hsa-mir-1255b-2	chr1: 167936559(NM_001349776)	chr1: 167935217-167935392(score=572)	Regulation	SRX2017936	level 1	Prostate	H.sapiens
hsa-mir-1255b-2	chr1: 167936559(NM_001349776)	chr1: 167935955-167936163(score=418)	Regulation	SRX734412	level 1	Prostate	H.sapiens
hsa-mir-1255b-2	chr1: 167936559(NM_001349776)	chr1: 167935975-167936219(score=582)	Regulation	SRX734411	level 1	Prostate	H.sapiens
hsa-mir-1255b-2	chr1: 167936559(NM_001349777)	chr1: 167932810-167932989(score=557)	Regulation	SRX471208	level 1	Prostate	H.sapiens
hsa-mir-1255b-2	chr1: 167936559(NM_001349777)	chr1: 167935217-167935392(score=572)	Regulation	SRX2017936	level 1	Prostate	H.sapiens
hsa-mir-1255b-2	chr1: 167936559(NM_001349777)	chr1: 167935955-167936163(score=418)	Regulation	SRX734412	level 1	Prostate	H.sapiens
hsa-mir-1255b-2	chr1: 167936559(NM_001349777)	chr1: 167935975-167936219(score=582)	Regulation	SRX734411	level 1	Prostate	H.sapiens
hsa-mir-1255b-2	chr1: 167936559(NM_001349779)	chr1: 167932810-167932989(score=557)	Regulation	SRX471208	level 1	Prostate	H.sapiens
hsa-mir-1255b-2	chr1: 167936559(NM_001349779)	chr1: 167935217-167935392(score=572)	Regulation	SRX2017936	level 1	Prostate	H.sapiens
hsa-mir-1255b-2	chr1: 167936559(NM_001349779)	chr1: 167935955-167936163(score=418)	Regulation	SRX734412	level 1	Prostate	H.sapiens
hsa-mir-1255b-2	chr1: 167936559(NM_001349779)	chr1: 167935975-167936219(score=582)	Regulation	SRX734411	level 1	Prostate	H.sapiens
hsa-mir-1255b-2	chr1: 167936559(NM_001349780)	chr1: 167932810-167932989(score=557)	Regulation	SRX471208	level 1	Prostate	H.sapiens
hsa-mir-1255b-2	chr1: 167936559(NM_001349780)	chr1: 167935217-167935392(score=572)	Regulation	SRX2017936	level 1	Prostate	H.sapiens
hsa-mir-1255b-2	chr1: 167936559(NM_001349780)	chr1: 167935955-167936163(score=418)	Regulation	SRX734412	level 1	Prostate	H.sapiens
hsa-mir-1255b-2	chr1: 167936559(NM_001349780)	chr1: 167935975-167936219(score=582)	Regulation	SRX734411	level 1	Prostate	H.sapiens
hsa-mir-1255b-2	chr1: 167936559(NM_018442)	chr1: 167932810-167932989(score=557)	Regulation	SRX471208	level 1	Prostate	H.sapiens
hsa-mir-1255b-2	chr1: 167936559(NM_018442)	chr1: 167935217-167935392(score=572)	Regulation	SRX2017936	level 1	Prostate	H.sapiens
hsa-mir-1255b-2	chr1: 167936559(NM_018442)	chr1: 167935955-167936163(score=418)	Regulation	SRX734412	level 1	Prostate	H.sapiens
hsa-mir-1255b-2	chr1: 167936559(NM_018442)	chr1: 167935975-167936219(score=582)	Regulation	SRX734411	level 1	Prostate	H.sapiens
hsa-mir-1255b-2	chr1: 167936559(NR_146228)	chr1: 167932810-167932989(score=557)	Regulation	SRX471208	level 1	Prostate	H.sapiens
hsa-mir-1255b-2	chr1: 167936559(NR_146228)	chr1: 167935217-167935392(score=572)	Regulation	SRX2017936	level 1	Prostate	H.sapiens
hsa-mir-1255b-2	chr1: 167936559(NR_146228)	chr1: 167935955-167936163(score=418)	Regulation	SRX734412	level 1	Prostate	H.sapiens
hsa-mir-1255b-2	chr1: 167936559(NR_146228)	chr1: 167935975-167936219(score=582)	Regulation	SRX734411	level 1	Prostate	H.sapiens
hsa-mir-1255b-2	chr1: 167936559(NR_146229)	chr1: 167932810-167932989(score=557)	Regulation	SRX471208	level 1	Prostate	H.sapiens
hsa-mir-1255b-2	chr1: 167936559(NR_146229)	chr1: 167935217-167935392(score=572)	Regulation	SRX2017936	level 1	Prostate	H.sapiens
hsa-mir-1255b-2	chr1: 167936559(NR_146229)	chr1: 167935955-167936163(score=418)	Regulation	SRX734412	level 1	Prostate	H.sapiens
hsa-mir-1255b-2	chr1: 167936559(NR_146229)	chr1: 167935975-167936219(score=582)	Regulation	SRX734411	level 1	Prostate	H.sapiens
hsa-mir-1255b-2	chr1: 167936559(NR_146230)	chr1: 167932810-167932989(score=557)	Regulation	SRX471208	level 1	Prostate	H.sapiens
hsa-mir-1255b-2	chr1: 167936559(NR_146230)	chr1: 167935217-167935392(score=572)	Regulation	SRX2017936	level 1	Prostate	H.sapiens
hsa-mir-1255b-2	chr1: 167936559(NR_146230)	chr1: 167935955-167936163(score=418)	Regulation	SRX734412	level 1	Prostate	H.sapiens
hsa-mir-1255b-2	chr1: 167936559(NR_146230)	chr1: 167935975-167936219(score=582)	Regulation	SRX734411	level 1	Prostate	H.sapiens
hsa-mir-1256	chr1: 21111383(NM_003760)	chr1: 21111002-21111189(score=474)	Regulation	SRX667982	level 1	Prostate	H.sapiens
hsa-mir-1256	chr1: 21111383(NM_003760)	chr1: 21111002-21111218(score=766)	Regulation	SRX667983	level 1	Prostate	H.sapiens
hsa-mir-1256	chr1: 21111383(NM_003760)	chr1: 21111003-21111229(score=651)	Regulation	SRX734410	level 1	Prostate	H.sapiens
hsa-mir-1256	chr1: 21111383(NM_003760)	chr1: 21111008-21111205(score=533)	Regulation	SRX383815	level 1	Prostate	H.sapiens
hsa-mir-1256	chr1: 21111383(NM_003760)	chr1: 21111019-21111177(score=458)	Regulation	SRX059704	level 1	Prostate	H.sapiens
hsa-mir-1256	chr1: 21111383(NM_003760)	chr1: 21111055-21111204(score=481)	Regulation	SRX101130	level 1	Prostate	H.sapiens
hsa-mir-1256	chr1: 21111383(NM_003760)	chr1: 21111074-21111246(score=714)	Regulation	SRX497604	level 1	Prostate	H.sapiens
hsa-mir-1256	chr1: 21111383(NM_003760)	chr1: 21111080-21111209(score=384)	Regulation	SRX101132	level 1	Prostate	H.sapiens
hsa-mir-125b-1	chr11: 122156371(NR_137188)	chr11: 122156421-122156593(score=751)	Regulation	SRX433201	level 1	Prostate	H.sapiens
hsa-mir-125b-1	chr11: 122156371(NR_137194)	chr11: 122156421-122156593(score=751)	Regulation	SRX433201	level 1	Prostate	H.sapiens
hsa-mir-125b-1	chr11: 122157113(NR_137186)	chr11: 122156421-122156593(score=751)	Regulation	SRX433201	level 1	Prostate	H.sapiens
hsa-mir-125b-1	chr11: 122157113(NR_137187)	chr11: 122156421-122156593(score=751)	Regulation	SRX433201	level 1	Prostate	H.sapiens
hsa-mir-125b-1	chr11: 122203109(NR_024430)	chr11: 122203270-122203672(score=1000)	Regulation	SRX433201	level 1	Prostate	H.sapiens
hsa-mir-125b-1	chr11: 122203109(NR_024430)	chr11: 122203290-122203671(score=735)	Regulation	SRX433198	level 1	Prostate	H.sapiens
hsa-mir-125b-1	chr11: 122203109(NR_024430)	chr11: 122203334-122203664(score=546)	Regulation	SRX433197	level 1	Prostate	H.sapiens
hsa-mir-125b-1	chr11: 122203109(NR_024430)	chr11: 122203383-122203683(score=815)	Regulation	SRX433202	level 1	Prostate	H.sapiens
hsa-mir-125b-1	chr11: 122203109(NR_137181)	chr11: 122203270-122203672(score=1000)	Regulation	SRX433201	level 1	Prostate	H.sapiens
hsa-mir-125b-1	chr11: 122203109(NR_137181)	chr11: 122203290-122203671(score=735)	Regulation	SRX433198	level 1	Prostate	H.sapiens
hsa-mir-125b-1	chr11: 122203109(NR_137181)	chr11: 122203334-122203664(score=546)	Regulation	SRX433197	level 1	Prostate	H.sapiens
hsa-mir-125b-1	chr11: 122203109(NR_137181)	chr11: 122203383-122203683(score=815)	Regulation	SRX433202	level 1	Prostate	H.sapiens
hsa-mir-125b-1	chr11: 122203109(NR_137182)	chr11: 122203270-122203672(score=1000)	Regulation	SRX433201	level 1	Prostate	H.sapiens
hsa-mir-125b-1	chr11: 122203109(NR_137182)	chr11: 122203290-122203671(score=735)	Regulation	SRX433198	level 1	Prostate	H.sapiens
hsa-mir-125b-1	chr11: 122203109(NR_137182)	chr11: 122203334-122203664(score=546)	Regulation	SRX433197	level 1	Prostate	H.sapiens
hsa-mir-125b-1	chr11: 122203109(NR_137182)	chr11: 122203383-122203683(score=815)	Regulation	SRX433202	level 1	Prostate	H.sapiens
hsa-mir-125b-2	chr21: 16419402	chr21: 16419189-16419464(score=643)	Regulation	SRX734410	level 2	Prostate	H.sapiens
hsa-mir-125b-2	chr21: 16419402	chr21: 16419194-16419405(score=579)	Regulation	SRX734411	level 2	Prostate	H.sapiens
hsa-mir-125b-2	chr21: 16419402	chr21: 16419208-16419408(score=415)	Regulation	SRX734412	level 2	Prostate	H.sapiens
hsa-mir-125b-2	chr21: 16419402	chr21: 16419217-16419392(score=392)	Regulation	SRX734409	level 2	Prostate	H.sapiens
hsa-mir-125b-2	chr21: 16181398(NR_136551)	chr21: 16177024-16177308(score=1000)	Regulation	SRX471208	level 1	Prostate	H.sapiens
hsa-mir-125b-2	chr21: 16181398(NR_136551)	chr21: 16177029-16177287(score=1000)	Regulation	SRX667982	level 1	Prostate	H.sapiens
hsa-mir-125b-2	chr21: 16181398(NR_136551)	chr21: 16177032-16177288(score=1000)	Regulation	SRX667983	level 1	Prostate	H.sapiens
hsa-mir-125b-2	chr21: 16181398(NR_136551)	chr21: 16177034-16177311(score=1000)	Regulation	SRX383815	level 1	Prostate	H.sapiens
hsa-mir-125b-2	chr21: 16181398(NR_136551)	chr21: 16177037-16177294(score=1000)	Regulation	SRX1885174	level 1	Prostate	H.sapiens
hsa-mir-125b-2	chr21: 16181398(NR_136551)	chr21: 16177040-16177269(score=668)	Regulation	SRX736065	level 1	Prostate	H.sapiens
hsa-mir-125b-2	chr21: 16181398(NR_136551)	chr21: 16177040-16177287(score=1000)	Regulation	SRX1885175	level 1	Prostate	H.sapiens
hsa-mir-125b-2	chr21: 16181398(NR_136551)	chr21: 16177041-16177277(score=1000)	Regulation	SRX059704	level 1	Prostate	H.sapiens
hsa-mir-125b-2	chr21: 16181398(NR_136551)	chr21: 16177048-16177300(score=454)	Regulation	SRX1818075	level 1	Prostate	H.sapiens
hsa-mir-125b-2	chr21: 16181398(NR_136551)	chr21: 16177049-16177284(score=729)	Regulation	SRX847035	level 1	Prostate	H.sapiens
hsa-mir-125b-2	chr21: 16181398(NR_136551)	chr21: 16177050-16177286(score=1000)	Regulation	SRX1885173	level 1	Prostate	H.sapiens
hsa-mir-125b-2	chr21: 16181398(NR_136551)	chr21: 16177051-16177291(score=1000)	Regulation	SRX1885176	level 1	Prostate	H.sapiens
hsa-mir-125b-2	chr21: 16181398(NR_136551)	chr21: 16177059-16177270(score=829)	Regulation	SRX1334492	level 1	Prostate	H.sapiens
hsa-mir-125b-2	chr21: 16181398(NR_136551)	chr21: 16177059-16177288(score=612)	Regulation	SRX1818077	level 1	Prostate	H.sapiens
hsa-mir-125b-2	chr21: 16181398(NR_136551)	chr21: 16177069-16177325(score=952)	Regulation	SRX2017926	level 1	Prostate	H.sapiens
hsa-mir-125b-2	chr21: 16181398(NR_136551)	chr21: 16177074-16177275(score=806)	Regulation	SRX1334494	level 1	Prostate	H.sapiens
hsa-mir-125b-2	chr21: 16181398(NR_136551)	chr21: 16177077-16177239(score=917)	Regulation	SRX497604	level 1	Prostate	H.sapiens
hsa-mir-125b-2	chr21: 16181398(NR_136551)	chr21: 16177081-16177260(score=465)	Regulation	SRX220080	level 1	Prostate	H.sapiens
hsa-mir-125b-2	chr21: 16181398(NR_136551)	chr21: 16177082-16177301(score=365)	Regulation	SRX847034	level 1	Prostate	H.sapiens
hsa-mir-125b-2	chr21: 16181398(NR_136551)	chr21: 16177086-16177269(score=316)	Regulation	SRX736066	level 1	Prostate	H.sapiens
hsa-mir-125b-2	chr21: 16181398(NR_136551)	chr21: 16177088-16177220(score=492)	Regulation	SRX101130	level 1	Prostate	H.sapiens
hsa-mir-125b-2	chr21: 16181398(NR_136551)	chr21: 16177093-16177214(score=518)	Regulation	SRX1334493	level 1	Prostate	H.sapiens
hsa-mir-125b-2	chr21: 16181398(NR_136551)	chr21: 16177102-16177224(score=458)	Regulation	SRX1033275	level 1	Prostate	H.sapiens
hsa-mir-125b-2	chr21: 16181398(NR_136551)	chr21: 16177109-16177255(score=397)	Regulation	SRX220079	level 1	Prostate	H.sapiens
hsa-mir-125b-2	chr21: 16181398(NR_136551)	chr21: 16177114-16177270(score=451)	Regulation	SRX173202	level 1	Prostate	H.sapiens
hsa-mir-125b-2	chr21: 16181398(NR_136551)	chr21: 16177126-16177278(score=372)	Regulation	SRX2017927	level 1	Prostate	H.sapiens
hsa-mir-125b-2	chr21: 16181398(NR_136551)	chr21: 16177128-16177250(score=412)	Regulation	SRX1334491	level 1	Prostate	H.sapiens
hsa-mir-125b-2	chr21: 16181398(NR_136551)	chr21: 16179804-16180050(score=726)	Regulation	SRX734410	level 1	Prostate	H.sapiens
hsa-mir-125b-2	chr21: 16181398(NR_136551)	chr21: 16179814-16180026(score=577)	Regulation	SRX734411	level 1	Prostate	H.sapiens
hsa-mir-125b-2	chr21: 16181398(NR_136551)	chr21: 16179833-16180027(score=426)	Regulation	SRX734412	level 1	Prostate	H.sapiens
hsa-mir-125b-2	chr21: 16181398(NR_136551)	chr21: 16179838-16180004(score=492)	Regulation	SRX173202	level 1	Prostate	H.sapiens
hsa-mir-125b-2	chr21: 16181398(NR_136551)	chr21: 16179843-16179979(score=431)	Regulation	SRX101132	level 1	Prostate	H.sapiens
hsa-mir-125b-2	chr21: 16181398(NR_136551)	chr21: 16179851-16180013(score=404)	Regulation	SRX734409	level 1	Prostate	H.sapiens
hsa-mir-125b-2	chr21: 16181398(NR_136551)	chr21: 16179857-16179979(score=508)	Regulation	SRX101130	level 1	Prostate	H.sapiens
hsa-mir-125b-2	chr21: 16181398(NR_136552)	chr21: 16177024-16177308(score=1000)	Regulation	SRX471208	level 1	Prostate	H.sapiens
hsa-mir-125b-2	chr21: 16181398(NR_136552)	chr21: 16177029-16177287(score=1000)	Regulation	SRX667982	level 1	Prostate	H.sapiens
hsa-mir-125b-2	chr21: 16181398(NR_136552)	chr21: 16177032-16177288(score=1000)	Regulation	SRX667983	level 1	Prostate	H.sapiens
hsa-mir-125b-2	chr21: 16181398(NR_136552)	chr21: 16177034-16177311(score=1000)	Regulation	SRX383815	level 1	Prostate	H.sapiens
hsa-mir-125b-2	chr21: 16181398(NR_136552)	chr21: 16177037-16177294(score=1000)	Regulation	SRX1885174	level 1	Prostate	H.sapiens
hsa-mir-125b-2	chr21: 16181398(NR_136552)	chr21: 16177040-16177269(score=668)	Regulation	SRX736065	level 1	Prostate	H.sapiens
hsa-mir-125b-2	chr21: 16181398(NR_136552)	chr21: 16177040-16177287(score=1000)	Regulation	SRX1885175	level 1	Prostate	H.sapiens
hsa-mir-125b-2	chr21: 16181398(NR_136552)	chr21: 16177041-16177277(score=1000)	Regulation	SRX059704	level 1	Prostate	H.sapiens
hsa-mir-125b-2	chr21: 16181398(NR_136552)	chr21: 16177048-16177300(score=454)	Regulation	SRX1818075	level 1	Prostate	H.sapiens
hsa-mir-125b-2	chr21: 16181398(NR_136552)	chr21: 16177049-16177284(score=729)	Regulation	SRX847035	level 1	Prostate	H.sapiens
hsa-mir-125b-2	chr21: 16181398(NR_136552)	chr21: 16177050-16177286(score=1000)	Regulation	SRX1885173	level 1	Prostate	H.sapiens
hsa-mir-125b-2	chr21: 16181398(NR_136552)	chr21: 16177051-16177291(score=1000)	Regulation	SRX1885176	level 1	Prostate	H.sapiens
hsa-mir-125b-2	chr21: 16181398(NR_136552)	chr21: 16177059-16177270(score=829)	Regulation	SRX1334492	level 1	Prostate	H.sapiens
hsa-mir-125b-2	chr21: 16181398(NR_136552)	chr21: 16177059-16177288(score=612)	Regulation	SRX1818077	level 1	Prostate	H.sapiens
hsa-mir-125b-2	chr21: 16181398(NR_136552)	chr21: 16177069-16177325(score=952)	Regulation	SRX2017926	level 1	Prostate	H.sapiens
hsa-mir-125b-2	chr21: 16181398(NR_136552)	chr21: 16177074-16177275(score=806)	Regulation	SRX1334494	level 1	Prostate	H.sapiens
hsa-mir-125b-2	chr21: 16181398(NR_136552)	chr21: 16177077-16177239(score=917)	Regulation	SRX497604	level 1	Prostate	H.sapiens
hsa-mir-125b-2	chr21: 16181398(NR_136552)	chr21: 16177081-16177260(score=465)	Regulation	SRX220080	level 1	Prostate	H.sapiens
hsa-mir-125b-2	chr21: 16181398(NR_136552)	chr21: 16177082-16177301(score=365)	Regulation	SRX847034	level 1	Prostate	H.sapiens
hsa-mir-125b-2	chr21: 16181398(NR_136552)	chr21: 16177086-16177269(score=316)	Regulation	SRX736066	level 1	Prostate	H.sapiens
hsa-mir-125b-2	chr21: 16181398(NR_136552)	chr21: 16177088-16177220(score=492)	Regulation	SRX101130	level 1	Prostate	H.sapiens
hsa-mir-125b-2	chr21: 16181398(NR_136552)	chr21: 16177093-16177214(score=518)	Regulation	SRX1334493	level 1	Prostate	H.sapiens
hsa-mir-125b-2	chr21: 16181398(NR_136552)	chr21: 16177102-16177224(score=458)	Regulation	SRX1033275	level 1	Prostate	H.sapiens
hsa-mir-125b-2	chr21: 16181398(NR_136552)	chr21: 16177109-16177255(score=397)	Regulation	SRX220079	level 1	Prostate	H.sapiens
hsa-mir-125b-2	chr21: 16181398(NR_136552)	chr21: 16177114-16177270(score=451)	Regulation	SRX173202	level 1	Prostate	H.sapiens
hsa-mir-125b-2	chr21: 16181398(NR_136552)	chr21: 16177126-16177278(score=372)	Regulation	SRX2017927	level 1	Prostate	H.sapiens
hsa-mir-125b-2	chr21: 16181398(NR_136552)	chr21: 16177128-16177250(score=412)	Regulation	SRX1334491	level 1	Prostate	H.sapiens
hsa-mir-125b-2	chr21: 16181398(NR_136552)	chr21: 16179804-16180050(score=726)	Regulation	SRX734410	level 1	Prostate	H.sapiens
hsa-mir-125b-2	chr21: 16181398(NR_136552)	chr21: 16179814-16180026(score=577)	Regulation	SRX734411	level 1	Prostate	H.sapiens
hsa-mir-125b-2	chr21: 16181398(NR_136552)	chr21: 16179833-16180027(score=426)	Regulation	SRX734412	level 1	Prostate	H.sapiens
hsa-mir-125b-2	chr21: 16181398(NR_136552)	chr21: 16179838-16180004(score=492)	Regulation	SRX173202	level 1	Prostate	H.sapiens
hsa-mir-125b-2	chr21: 16181398(NR_136552)	chr21: 16179843-16179979(score=431)	Regulation	SRX101132	level 1	Prostate	H.sapiens
hsa-mir-125b-2	chr21: 16181398(NR_136552)	chr21: 16179851-16180013(score=404)	Regulation	SRX734409	level 1	Prostate	H.sapiens
hsa-mir-125b-2	chr21: 16181398(NR_136552)	chr21: 16179857-16179979(score=508)	Regulation	SRX101130	level 1	Prostate	H.sapiens
hsa-mir-125b-2	chr21: 16419203(NR_136544)	chr21: 16419657-16420013(score=1000)	Regulation	SRX734410	level 1	Prostate	H.sapiens
hsa-mir-125b-2	chr21: 16419203(NR_136544)	chr21: 16419660-16419952(score=309)	Regulation	SRX595676	level 1	Prostate	H.sapiens
hsa-mir-125b-2	chr21: 16419203(NR_136544)	chr21: 16419711-16419943(score=1000)	Regulation	SRX173202	level 1	Prostate	H.sapiens
hsa-mir-125b-2	chr21: 16419203(NR_136544)	chr21: 16419711-16419956(score=857)	Regulation	SRX734412	level 1	Prostate	H.sapiens
hsa-mir-125b-2	chr21: 16419203(NR_136544)	chr21: 16419718-16419942(score=1000)	Regulation	SRX734411	level 1	Prostate	H.sapiens
hsa-mir-125b-2	chr21: 16419203(NR_136544)	chr21: 16419726-16419973(score=900)	Regulation	SRX471208	level 1	Prostate	H.sapiens
hsa-mir-125b-2	chr21: 16419203(NR_136544)	chr21: 16419730-16419938(score=453)	Regulation	SRX471850	level 1	Prostate	H.sapiens
hsa-mir-125b-2	chr21: 16419203(NR_136544)	chr21: 16419731-16419975(score=906)	Regulation	SRX059704	level 1	Prostate	H.sapiens
hsa-mir-125b-2	chr21: 16419203(NR_136544)	chr21: 16419733-16420041(score=296)	Regulation	SRX1569768	level 1	Prostate	H.sapiens
hsa-mir-125b-2	chr21: 16419203(NR_136544)	chr21: 16419738-16419949(score=643)	Regulation	SRX734409	level 1	Prostate	H.sapiens
hsa-mir-125b-2	chr21: 16419203(NR_136544)	chr21: 16419741-16419876(score=338)	Regulation	SRX736065	level 1	Prostate	H.sapiens
hsa-mir-125b-2	chr21: 16419203(NR_136544)	chr21: 16419746-16419943(score=654)	Regulation	SRX2017926	level 1	Prostate	H.sapiens
hsa-mir-125b-2	chr21: 16419203(NR_136544)	chr21: 16419754-16419938(score=506)	Regulation	SRX847035	level 1	Prostate	H.sapiens
hsa-mir-125b-2	chr21: 16419203(NR_136544)	chr21: 16419760-16419943(score=755)	Regulation	SRX383815	level 1	Prostate	H.sapiens
hsa-mir-125b-2	chr21: 16419203(NR_136544)	chr21: 16419766-16419952(score=442)	Regulation	SRX471849	level 1	Prostate	H.sapiens
hsa-mir-125b-2	chr21: 16419203(NR_136544)	chr21: 16419773-16419886(score=515)	Regulation	SRX173201	level 1	Prostate	H.sapiens
hsa-mir-125b-2	chr21: 16419203(NR_136544)	chr21: 16419775-16419929(score=700)	Regulation	SRX101130	level 1	Prostate	H.sapiens
hsa-mir-125b-2	chr21: 16419203(NR_136544)	chr21: 16419777-16419914(score=654)	Regulation	SRX497604	level 1	Prostate	H.sapiens
hsa-mir-125b-2	chr21: 16419203(NR_136544)	chr21: 16419777-16419988(score=419)	Regulation	SRX847034	level 1	Prostate	H.sapiens
hsa-mir-125b-2	chr21: 16419203(NR_136544)	chr21: 16419780-16419941(score=704)	Regulation	SRX101132	level 1	Prostate	H.sapiens
hsa-mir-125b-2	chr21: 16419203(NR_136544)	chr21: 16419783-16419889(score=517)	Regulation	SRX1334494	level 1	Prostate	H.sapiens
hsa-mir-125b-2	chr21: 16419203(NR_136544)	chr21: 16419793-16419927(score=430)	Regulation	SRX101135	level 1	Prostate	H.sapiens
hsa-mir-125b-2	chr21: 16419203(NR_136544)	chr21: 16419797-16419846(score=260)	Regulation	SRX220080	level 1	Prostate	H.sapiens
hsa-mir-125b-2	chr21: 16419203(NR_136544)	chr21: 16419811-16419883(score=352)	Regulation	SRX1334492	level 1	Prostate	H.sapiens
hsa-mir-125b-2	chr21: 16419203(NR_136545)	chr21: 16419657-16420013(score=1000)	Regulation	SRX734410	level 1	Prostate	H.sapiens
hsa-mir-125b-2	chr21: 16419203(NR_136545)	chr21: 16419660-16419952(score=309)	Regulation	SRX595676	level 1	Prostate	H.sapiens
hsa-mir-125b-2	chr21: 16419203(NR_136545)	chr21: 16419711-16419943(score=1000)	Regulation	SRX173202	level 1	Prostate	H.sapiens
hsa-mir-125b-2	chr21: 16419203(NR_136545)	chr21: 16419711-16419956(score=857)	Regulation	SRX734412	level 1	Prostate	H.sapiens
hsa-mir-125b-2	chr21: 16419203(NR_136545)	chr21: 16419718-16419942(score=1000)	Regulation	SRX734411	level 1	Prostate	H.sapiens
hsa-mir-125b-2	chr21: 16419203(NR_136545)	chr21: 16419726-16419973(score=900)	Regulation	SRX471208	level 1	Prostate	H.sapiens
hsa-mir-125b-2	chr21: 16419203(NR_136545)	chr21: 16419730-16419938(score=453)	Regulation	SRX471850	level 1	Prostate	H.sapiens
hsa-mir-125b-2	chr21: 16419203(NR_136545)	chr21: 16419731-16419975(score=906)	Regulation	SRX059704	level 1	Prostate	H.sapiens
hsa-mir-125b-2	chr21: 16419203(NR_136545)	chr21: 16419733-16420041(score=296)	Regulation	SRX1569768	level 1	Prostate	H.sapiens
hsa-mir-125b-2	chr21: 16419203(NR_136545)	chr21: 16419738-16419949(score=643)	Regulation	SRX734409	level 1	Prostate	H.sapiens
hsa-mir-125b-2	chr21: 16419203(NR_136545)	chr21: 16419741-16419876(score=338)	Regulation	SRX736065	level 1	Prostate	H.sapiens
hsa-mir-125b-2	chr21: 16419203(NR_136545)	chr21: 16419746-16419943(score=654)	Regulation	SRX2017926	level 1	Prostate	H.sapiens
hsa-mir-125b-2	chr21: 16419203(NR_136545)	chr21: 16419754-16419938(score=506)	Regulation	SRX847035	level 1	Prostate	H.sapiens
hsa-mir-125b-2	chr21: 16419203(NR_136545)	chr21: 16419760-16419943(score=755)	Regulation	SRX383815	level 1	Prostate	H.sapiens
hsa-mir-125b-2	chr21: 16419203(NR_136545)	chr21: 16419766-16419952(score=442)	Regulation	SRX471849	level 1	Prostate	H.sapiens
hsa-mir-125b-2	chr21: 16419203(NR_136545)	chr21: 16419773-16419886(score=515)	Regulation	SRX173201	level 1	Prostate	H.sapiens
hsa-mir-125b-2	chr21: 16419203(NR_136545)	chr21: 16419775-16419929(score=700)	Regulation	SRX101130	level 1	Prostate	H.sapiens
hsa-mir-125b-2	chr21: 16419203(NR_136545)	chr21: 16419777-16419914(score=654)	Regulation	SRX497604	level 1	Prostate	H.sapiens
hsa-mir-125b-2	chr21: 16419203(NR_136545)	chr21: 16419777-16419988(score=419)	Regulation	SRX847034	level 1	Prostate	H.sapiens
hsa-mir-125b-2	chr21: 16419203(NR_136545)	chr21: 16419780-16419941(score=704)	Regulation	SRX101132	level 1	Prostate	H.sapiens
hsa-mir-125b-2	chr21: 16419203(NR_136545)	chr21: 16419783-16419889(score=517)	Regulation	SRX1334494	level 1	Prostate	H.sapiens
hsa-mir-125b-2	chr21: 16419203(NR_136545)	chr21: 16419793-16419927(score=430)	Regulation	SRX101135	level 1	Prostate	H.sapiens
hsa-mir-125b-2	chr21: 16419203(NR_136545)	chr21: 16419797-16419846(score=260)	Regulation	SRX220080	level 1	Prostate	H.sapiens
hsa-mir-125b-2	chr21: 16419203(NR_136545)	chr21: 16419811-16419883(score=352)	Regulation	SRX1334492	level 1	Prostate	H.sapiens
hsa-mir-125b-2	chr21: 16419203(NR_136546)	chr21: 16419657-16420013(score=1000)	Regulation	SRX734410	level 1	Prostate	H.sapiens
hsa-mir-125b-2	chr21: 16419203(NR_136546)	chr21: 16419660-16419952(score=309)	Regulation	SRX595676	level 1	Prostate	H.sapiens
hsa-mir-125b-2	chr21: 16419203(NR_136546)	chr21: 16419711-16419943(score=1000)	Regulation	SRX173202	level 1	Prostate	H.sapiens
hsa-mir-125b-2	chr21: 16419203(NR_136546)	chr21: 16419711-16419956(score=857)	Regulation	SRX734412	level 1	Prostate	H.sapiens
hsa-mir-125b-2	chr21: 16419203(NR_136546)	chr21: 16419718-16419942(score=1000)	Regulation	SRX734411	level 1	Prostate	H.sapiens
hsa-mir-125b-2	chr21: 16419203(NR_136546)	chr21: 16419726-16419973(score=900)	Regulation	SRX471208	level 1	Prostate	H.sapiens
hsa-mir-125b-2	chr21: 16419203(NR_136546)	chr21: 16419730-16419938(score=453)	Regulation	SRX471850	level 1	Prostate	H.sapiens
hsa-mir-125b-2	chr21: 16419203(NR_136546)	chr21: 16419731-16419975(score=906)	Regulation	SRX059704	level 1	Prostate	H.sapiens
hsa-mir-125b-2	chr21: 16419203(NR_136546)	chr21: 16419733-16420041(score=296)	Regulation	SRX1569768	level 1	Prostate	H.sapiens
hsa-mir-125b-2	chr21: 16419203(NR_136546)	chr21: 16419738-16419949(score=643)	Regulation	SRX734409	level 1	Prostate	H.sapiens
hsa-mir-125b-2	chr21: 16419203(NR_136546)	chr21: 16419741-16419876(score=338)	Regulation	SRX736065	level 1	Prostate	H.sapiens
hsa-mir-125b-2	chr21: 16419203(NR_136546)	chr21: 16419746-16419943(score=654)	Regulation	SRX2017926	level 1	Prostate	H.sapiens
hsa-mir-125b-2	chr21: 16419203(NR_136546)	chr21: 16419754-16419938(score=506)	Regulation	SRX847035	level 1	Prostate	H.sapiens
hsa-mir-125b-2	chr21: 16419203(NR_136546)	chr21: 16419760-16419943(score=755)	Regulation	SRX383815	level 1	Prostate	H.sapiens
hsa-mir-125b-2	chr21: 16419203(NR_136546)	chr21: 16419766-16419952(score=442)	Regulation	SRX471849	level 1	Prostate	H.sapiens
hsa-mir-125b-2	chr21: 16419203(NR_136546)	chr21: 16419773-16419886(score=515)	Regulation	SRX173201	level 1	Prostate	H.sapiens
hsa-mir-125b-2	chr21: 16419203(NR_136546)	chr21: 16419775-16419929(score=700)	Regulation	SRX101130	level 1	Prostate	H.sapiens
hsa-mir-125b-2	chr21: 16419203(NR_136546)	chr21: 16419777-16419914(score=654)	Regulation	SRX497604	level 1	Prostate	H.sapiens
hsa-mir-125b-2	chr21: 16419203(NR_136546)	chr21: 16419777-16419988(score=419)	Regulation	SRX847034	level 1	Prostate	H.sapiens
hsa-mir-125b-2	chr21: 16419203(NR_136546)	chr21: 16419780-16419941(score=704)	Regulation	SRX101132	level 1	Prostate	H.sapiens
hsa-mir-125b-2	chr21: 16419203(NR_136546)	chr21: 16419783-16419889(score=517)	Regulation	SRX1334494	level 1	Prostate	H.sapiens
hsa-mir-125b-2	chr21: 16419203(NR_136546)	chr21: 16419793-16419927(score=430)	Regulation	SRX101135	level 1	Prostate	H.sapiens
hsa-mir-125b-2	chr21: 16419203(NR_136546)	chr21: 16419797-16419846(score=260)	Regulation	SRX220080	level 1	Prostate	H.sapiens
hsa-mir-125b-2	chr21: 16419203(NR_136546)	chr21: 16419811-16419883(score=352)	Regulation	SRX1334492	level 1	Prostate	H.sapiens
hsa-mir-125b-2	chr21: 16420295(NR_136550)	chr21: 16419657-16420013(score=1000)	Regulation	SRX734410	level 1	Prostate	H.sapiens
hsa-mir-125b-2	chr21: 16420295(NR_136550)	chr21: 16419660-16419952(score=309)	Regulation	SRX595676	level 1	Prostate	H.sapiens
hsa-mir-125b-2	chr21: 16420295(NR_136550)	chr21: 16419711-16419943(score=1000)	Regulation	SRX173202	level 1	Prostate	H.sapiens
hsa-mir-125b-2	chr21: 16420295(NR_136550)	chr21: 16419711-16419956(score=857)	Regulation	SRX734412	level 1	Prostate	H.sapiens
hsa-mir-125b-2	chr21: 16420295(NR_136550)	chr21: 16419718-16419942(score=1000)	Regulation	SRX734411	level 1	Prostate	H.sapiens
hsa-mir-125b-2	chr21: 16420295(NR_136550)	chr21: 16419726-16419973(score=900)	Regulation	SRX471208	level 1	Prostate	H.sapiens
hsa-mir-125b-2	chr21: 16420295(NR_136550)	chr21: 16419730-16419938(score=453)	Regulation	SRX471850	level 1	Prostate	H.sapiens
hsa-mir-125b-2	chr21: 16420295(NR_136550)	chr21: 16419731-16419975(score=906)	Regulation	SRX059704	level 1	Prostate	H.sapiens
hsa-mir-125b-2	chr21: 16420295(NR_136550)	chr21: 16419733-16420041(score=296)	Regulation	SRX1569768	level 1	Prostate	H.sapiens
hsa-mir-125b-2	chr21: 16420295(NR_136550)	chr21: 16419738-16419949(score=643)	Regulation	SRX734409	level 1	Prostate	H.sapiens
hsa-mir-125b-2	chr21: 16420295(NR_136550)	chr21: 16419741-16419876(score=338)	Regulation	SRX736065	level 1	Prostate	H.sapiens
hsa-mir-125b-2	chr21: 16420295(NR_136550)	chr21: 16419746-16419943(score=654)	Regulation	SRX2017926	level 1	Prostate	H.sapiens
hsa-mir-125b-2	chr21: 16420295(NR_136550)	chr21: 16419754-16419938(score=506)	Regulation	SRX847035	level 1	Prostate	H.sapiens
hsa-mir-125b-2	chr21: 16420295(NR_136550)	chr21: 16419760-16419943(score=755)	Regulation	SRX383815	level 1	Prostate	H.sapiens
hsa-mir-125b-2	chr21: 16420295(NR_136550)	chr21: 16419766-16419952(score=442)	Regulation	SRX471849	level 1	Prostate	H.sapiens
hsa-mir-125b-2	chr21: 16420295(NR_136550)	chr21: 16419773-16419886(score=515)	Regulation	SRX173201	level 1	Prostate	H.sapiens
hsa-mir-125b-2	chr21: 16420295(NR_136550)	chr21: 16419775-16419929(score=700)	Regulation	SRX101130	level 1	Prostate	H.sapiens
hsa-mir-125b-2	chr21: 16420295(NR_136550)	chr21: 16419777-16419914(score=654)	Regulation	SRX497604	level 1	Prostate	H.sapiens
hsa-mir-125b-2	chr21: 16420295(NR_136550)	chr21: 16419777-16419988(score=419)	Regulation	SRX847034	level 1	Prostate	H.sapiens
hsa-mir-125b-2	chr21: 16420295(NR_136550)	chr21: 16419780-16419941(score=704)	Regulation	SRX101132	level 1	Prostate	H.sapiens
hsa-mir-125b-2	chr21: 16420295(NR_136550)	chr21: 16419783-16419889(score=517)	Regulation	SRX1334494	level 1	Prostate	H.sapiens
hsa-mir-125b-2	chr21: 16420295(NR_136550)	chr21: 16419793-16419927(score=430)	Regulation	SRX101135	level 1	Prostate	H.sapiens
hsa-mir-125b-2	chr21: 16420295(NR_136550)	chr21: 16419797-16419846(score=260)	Regulation	SRX220080	level 1	Prostate	H.sapiens
hsa-mir-125b-2	chr21: 16420295(NR_136550)	chr21: 16419811-16419883(score=352)	Regulation	SRX1334492	level 1	Prostate	H.sapiens
hsa-mir-126	chr9: 136670602	chr9: 136670594-136670721(score=402)	Regulation	SRX306516	level 1	Prostate	H.sapiens
hsa-mir-1262	chr1: 68232546(NM_001002292)	chr1: 68234116-68234458(score=941)	Regulation	SRX433198	level 1	Prostate	H.sapiens
hsa-mir-1262	chr1: 68232546(NM_001002292)	chr1: 68234121-68234366(score=680)	Regulation	SRX433197	level 1	Prostate	H.sapiens
hsa-mir-1262	chr1: 68232546(NM_001193334)	chr1: 68234116-68234458(score=941)	Regulation	SRX433198	level 1	Prostate	H.sapiens
hsa-mir-1262	chr1: 68232546(NM_001193334)	chr1: 68234121-68234366(score=680)	Regulation	SRX433197	level 1	Prostate	H.sapiens
hsa-mir-1262	chr1: 68232601(NM_024911)	chr1: 68234116-68234458(score=941)	Regulation	SRX433198	level 1	Prostate	H.sapiens
hsa-mir-1262	chr1: 68232601(NM_024911)	chr1: 68234121-68234366(score=680)	Regulation	SRX433197	level 1	Prostate	H.sapiens
hsa-mir-1266	chr15: 52295778	chr15: 52295754-52295944(score=488)	Regulation	SRX734410	level 2	Prostate	H.sapiens
hsa-mir-1266	chr15: 52295778	chr15: 52295761-52295960(score=479)	Regulation	SRX734411	level 2	Prostate	H.sapiens
hsa-mir-1268b	chr17: 80036642	chr17: 80036521-80036676(score=418)	Regulation	SRX734411	level 2	Prostate	H.sapiens
hsa-mir-1269a	chr4: 66276824	chr4: 66273400-66273547(score=261)	Regulation	SRX383815	level 1	Prostate	H.sapiens
hsa-mir-1270	chr19: 20424965(NR_036455)	chr19: 20429193-20429348(score=341)	Regulation	SRX734410	level 1	Prostate	H.sapiens
hsa-mir-1271	chr5: 176365468(NM_001317948)	chr5: 176361736-176361884(score=635)	Regulation	SRX2017936	level 1	Prostate	H.sapiens
hsa-mir-1271	chr5: 176365468(NM_001317948)	chr5: 176361761-176361843(score=404)	Regulation	SRX2017937	level 1	Prostate	H.sapiens
hsa-mir-1271	chr5: 176365468(NM_173664)	chr5: 176361736-176361884(score=635)	Regulation	SRX2017936	level 1	Prostate	H.sapiens
hsa-mir-1271	chr5: 176365468(NM_173664)	chr5: 176361761-176361843(score=404)	Regulation	SRX2017937	level 1	Prostate	H.sapiens
hsa-mir-1273c	chr6: 154733416	chr6: 154733194-154733443(score=288)	Regulation	SRX734410	level 2	Prostate	H.sapiens
hsa-mir-1273c	chr6: 154733416	chr6: 154733216-154733402(score=306)	Regulation	SRX734411	level 2	Prostate	H.sapiens
hsa-mir-1273c	chr6: 154733416	chr6: 154733234-154733410(score=362)	Regulation	SRX734409	level 2	Prostate	H.sapiens
hsa-mir-1273c	chr6: 154733416	chr6: 154733239-154733396(score=351)	Regulation	SRX734412	level 2	Prostate	H.sapiens
hsa-mir-1273c	chr6: 154853360	chr6: 154852693-154852928(score=847)	Regulation	SRX471208	level 1	Prostate	H.sapiens
hsa-mir-1273c	chr6: 154853360	chr6: 154852701-154852938(score=978)	Regulation	SRX734410	level 1	Prostate	H.sapiens
hsa-mir-1273c	chr6: 154853360	chr6: 154852706-154852905(score=513)	Regulation	SRX059704	level 1	Prostate	H.sapiens
hsa-mir-1273c	chr6: 154853360	chr6: 154852707-154852938(score=1000)	Regulation	SRX173202	level 1	Prostate	H.sapiens
hsa-mir-1273c	chr6: 154853360	chr6: 154852729-154852915(score=736)	Regulation	SRX101132	level 1	Prostate	H.sapiens
hsa-mir-1273c	chr6: 154853360	chr6: 154852734-154852885(score=455)	Regulation	SRX383815	level 1	Prostate	H.sapiens
hsa-mir-1273c	chr6: 154853360	chr6: 154852738-154852897(score=746)	Regulation	SRX101130	level 1	Prostate	H.sapiens
hsa-mir-1273c	chr6: 154853360	chr6: 154852744-154852930(score=688)	Regulation	SRX734411	level 1	Prostate	H.sapiens
hsa-mir-1273c	chr6: 154853360	chr6: 154852761-154852876(score=425)	Regulation	SRX101135	level 1	Prostate	H.sapiens
hsa-mir-1273c	chr6: 154853360	chr6: 154852766-154852934(score=533)	Regulation	SRX734412	level 1	Prostate	H.sapiens
hsa-mir-1273c	chr6: 154853360	chr6: 154852770-154852898(score=410)	Regulation	SRX1818077	level 1	Prostate	H.sapiens
hsa-mir-1273c	chr6: 154853360	chr6: 154852772-154852848(score=368)	Regulation	SRX1334494	level 1	Prostate	H.sapiens
hsa-mir-1273c	chr6: 154853360	chr6: 154852779-154852888(score=348)	Regulation	SRX1033275	level 1	Prostate	H.sapiens
hsa-mir-1273c	chr6: 154853360	chr6: 154852785-154852911(score=418)	Regulation	SRX1818073	level 1	Prostate	H.sapiens
hsa-mir-1277	chrX: 118346073(NM_001184965)	chrX: 118345147-118345596(score=798)	Regulation(feedback)	SRX734410	level 1	Prostate	H.sapiens
hsa-mir-1277	chrX: 118346073(NM_001184965)	chrX: 118345150-118345457(score=608)	Regulation(feedback)	SRX734411	level 1	Prostate	H.sapiens
hsa-mir-1277	chrX: 118346073(NM_001184965)	chrX: 118345178-118345418(score=500)	Regulation(feedback)	SRX173202	level 1	Prostate	H.sapiens
hsa-mir-1277	chrX: 118346073(NM_001184965)	chrX: 118345187-118345400(score=445)	Regulation(feedback)	SRX734412	level 1	Prostate	H.sapiens
hsa-mir-1277	chrX: 118346073(NM_001184966)	chrX: 118345147-118345596(score=798)	Regulation(feedback)	SRX734410	level 1	Prostate	H.sapiens
hsa-mir-1277	chrX: 118346073(NM_001184966)	chrX: 118345150-118345457(score=608)	Regulation(feedback)	SRX734411	level 1	Prostate	H.sapiens
hsa-mir-1277	chrX: 118346073(NM_001184966)	chrX: 118345178-118345418(score=500)	Regulation(feedback)	SRX173202	level 1	Prostate	H.sapiens
hsa-mir-1277	chrX: 118346073(NM_001184966)	chrX: 118345187-118345400(score=445)	Regulation(feedback)	SRX734412	level 1	Prostate	H.sapiens
hsa-mir-1277	chrX: 118346073(NM_019045)	chrX: 118345147-118345596(score=798)	Regulation(feedback)	SRX734410	level 1	Prostate	H.sapiens
hsa-mir-1277	chrX: 118346073(NM_019045)	chrX: 118345150-118345457(score=608)	Regulation(feedback)	SRX734411	level 1	Prostate	H.sapiens
hsa-mir-1277	chrX: 118346073(NM_019045)	chrX: 118345178-118345418(score=500)	Regulation(feedback)	SRX173202	level 1	Prostate	H.sapiens
hsa-mir-1277	chrX: 118346073(NM_019045)	chrX: 118345187-118345400(score=445)	Regulation(feedback)	SRX734412	level 1	Prostate	H.sapiens
hsa-mir-1278	chr1: 193121958(NM_024529)	chr1: 193121715-193122155(score=885)	Regulation	SRX734410	level 1	Prostate	H.sapiens
hsa-mir-1278	chr1: 193121958(NM_024529)	chr1: 193121715-193122175(score=990)	Regulation	SRX734411	level 1	Prostate	H.sapiens
hsa-mir-1278	chr1: 193121958(NM_024529)	chr1: 193121732-193122141(score=870)	Regulation	SRX734409	level 1	Prostate	H.sapiens
hsa-mir-1278	chr1: 193121958(NM_024529)	chr1: 193121757-193122160(score=742)	Regulation	SRX734412	level 1	Prostate	H.sapiens
hsa-mir-1279	chr12: 69273218	chr12: 69278007-69278207(score=940)	Regulation	SRX497604	level 1	Prostate	H.sapiens
hsa-mir-1279	chr12: 69273218	chr12: 69278013-69278207(score=933)	Regulation	SRX101132	level 1	Prostate	H.sapiens
hsa-mir-1279	chr12: 69273218	chr12: 69278023-69278195(score=718)	Regulation	SRX101135	level 1	Prostate	H.sapiens
hsa-mir-1279	chr12: 69273218	chr12: 69278023-69278210(score=683)	Regulation	SRX1950172	level 1	Prostate	H.sapiens
hsa-mir-1279	chr12: 69273218	chr12: 69278031-69278204(score=440)	Regulation	SRX471855	level 1	Prostate	H.sapiens
hsa-mir-1279	chr12: 69273218	chr12: 69278038-69278191(score=677)	Regulation	SRX173201	level 1	Prostate	H.sapiens
hsa-mir-1279	chr12: 69273218	chr12: 69278046-69278192(score=539)	Regulation	SRX101133	level 1	Prostate	H.sapiens
hsa-mir-1279	chr12: 69273218	chr12: 69278046-69278207(score=540)	Regulation	SRX734410	level 1	Prostate	H.sapiens
hsa-mir-1279	chr12: 69273218	chr12: 69278086-69278196(score=291)	Regulation	SRX101136	level 1	Prostate	H.sapiens
hsa-mir-1282	chr15: 43798835	chr15: 43798845-43799096(score=1000)	Regulation	SRX734410	level 2	Prostate	H.sapiens
hsa-mir-1282	chr15: 43798835	chr15: 43798862-43799107(score=953)	Regulation	SRX734411	level 2	Prostate	H.sapiens
hsa-mir-1282	chr15: 43798835	chr15: 43798885-43799085(score=598)	Regulation	SRX734409	level 2	Prostate	H.sapiens
hsa-mir-1282	chr15: 43798835	chr15: 43798886-43799086(score=575)	Regulation	SRX734412	level 2	Prostate	H.sapiens
hsa-mir-1284	chr3: 71583722	chr3: 71583644-71583838(score=654)	Regulation	SRX734411	level 2	Prostate	H.sapiens
hsa-mir-1284	chr3: 71583722	chr3: 71583659-71583827(score=415)	Regulation	SRX734409	level 2	Prostate	H.sapiens
hsa-mir-1284	chr3: 71583722	chr3: 71583661-71583817(score=385)	Regulation	SRX734412	level 2	Prostate	H.sapiens
hsa-mir-1284	chr3: 71583722	chr3: 71583665-71583834(score=552)	Regulation	SRX734410	level 2	Prostate	H.sapiens
hsa-mir-1284	chr3: 71542089	chr3: 71541771-71541961(score=427)	Regulation	SRX734410	level 1	Prostate	H.sapiens
hsa-mir-1284	chr3: 71542089	chr3: 71541773-71541941(score=490)	Regulation	SRX471208	level 1	Prostate	H.sapiens
hsa-mir-1284	chr3: 71542089	chr3: 71542685-71542835(score=328)	Regulation	SRX734410	level 1	Prostate	H.sapiens
hsa-mir-1284	chr3: 71542089	chr3: 71542732-71542874(score=468)	Regulation	SRX734411	level 1	Prostate	H.sapiens
hsa-mir-1284	chr3: 71542089	chr3: 71545386-71545706(score=1000)	Regulation	SRX471208	level 1	Prostate	H.sapiens
hsa-mir-1284	chr3: 71542089	chr3: 71545387-71545689(score=360)	Regulation	SRX1569768	level 1	Prostate	H.sapiens
hsa-mir-1284	chr3: 71542089	chr3: 71545411-71545689(score=1000)	Regulation	SRX734410	level 1	Prostate	H.sapiens
hsa-mir-1284	chr3: 71542089	chr3: 71545413-71545735(score=862)	Regulation	SRX847034	level 1	Prostate	H.sapiens
hsa-mir-1284	chr3: 71542089	chr3: 71545425-71545660(score=965)	Regulation	SRX847035	level 1	Prostate	H.sapiens
hsa-mir-1284	chr3: 71542089	chr3: 71545427-71545669(score=634)	Regulation	SRX502070	level 1	Prostate	H.sapiens
hsa-mir-1284	chr3: 71542089	chr3: 71545439-71545710(score=415)	Regulation	SRX1569781	level 1	Prostate	H.sapiens
hsa-mir-1284	chr3: 71542089	chr3: 71545440-71545654(score=1000)	Regulation	SRX101130	level 1	Prostate	H.sapiens
hsa-mir-1284	chr3: 71542089	chr3: 71545446-71545649(score=806)	Regulation	SRX1818077	level 1	Prostate	H.sapiens
hsa-mir-1284	chr3: 71542089	chr3: 71545447-71545679(score=1000)	Regulation	SRX383815	level 1	Prostate	H.sapiens
hsa-mir-1284	chr3: 71542089	chr3: 71545447-71545706(score=394)	Regulation	SRX595690	level 1	Prostate	H.sapiens
hsa-mir-1284	chr3: 71542089	chr3: 71545450-71545635(score=577)	Regulation	SRX1818075	level 1	Prostate	H.sapiens
hsa-mir-1284	chr3: 71542089	chr3: 71545460-71545665(score=712)	Regulation	SRX734409	level 1	Prostate	H.sapiens
hsa-mir-1284	chr3: 71542089	chr3: 71545460-71545668(score=670)	Regulation	SRX059704	level 1	Prostate	H.sapiens
hsa-mir-1284	chr3: 71542089	chr3: 71545461-71545600(score=341)	Regulation	SRX502063	level 1	Prostate	H.sapiens
hsa-mir-1284	chr3: 71542089	chr3: 71545461-71545623(score=574)	Regulation	SRX734411	level 1	Prostate	H.sapiens
hsa-mir-1284	chr3: 71542089	chr3: 71545461-71545624(score=372)	Regulation	SRX502057	level 1	Prostate	H.sapiens
hsa-mir-1284	chr3: 71542089	chr3: 71545461-71545637(score=585)	Regulation	SRX173202	level 1	Prostate	H.sapiens
hsa-mir-1284	chr3: 71542089	chr3: 71545461-71545658(score=574)	Regulation	SRX667983	level 1	Prostate	H.sapiens
hsa-mir-1284	chr3: 71542089	chr3: 71545462-71545674(score=492)	Regulation	SRX2545039	level 1	Prostate	H.sapiens
hsa-mir-1284	chr3: 71542089	chr3: 71545464-71545651(score=1000)	Regulation	SRX101132	level 1	Prostate	H.sapiens
hsa-mir-1284	chr3: 71542089	chr3: 71545473-71545664(score=556)	Regulation	SRX471849	level 1	Prostate	H.sapiens
hsa-mir-1284	chr3: 71542089	chr3: 71545475-71545631(score=761)	Regulation	SRX101135	level 1	Prostate	H.sapiens
hsa-mir-1284	chr3: 71542089	chr3: 71545476-71545615(score=519)	Regulation	SRX497604	level 1	Prostate	H.sapiens
hsa-mir-1284	chr3: 71542089	chr3: 71545476-71545642(score=606)	Regulation	SRX101137	level 1	Prostate	H.sapiens
hsa-mir-1284	chr3: 71542089	chr3: 71545476-71545644(score=679)	Regulation	SRX101133	level 1	Prostate	H.sapiens
hsa-mir-1284	chr3: 71542089	chr3: 71545480-71545655(score=468)	Regulation	SRX667982	level 1	Prostate	H.sapiens
hsa-mir-1284	chr3: 71542089	chr3: 71545484-71545631(score=430)	Regulation	SRX734412	level 1	Prostate	H.sapiens
hsa-mir-1284	chr3: 71542089	chr3: 71545485-71545621(score=491)	Regulation	SRX101136	level 1	Prostate	H.sapiens
hsa-mir-1284	chr3: 71542089	chr3: 71545488-71545634(score=556)	Regulation	SRX1334494	level 1	Prostate	H.sapiens
hsa-mir-1284	chr3: 71542089	chr3: 71545489-71545665(score=498)	Regulation	SRX471207	level 1	Prostate	H.sapiens
hsa-mir-1284	chr3: 71542089	chr3: 71545493-71545588(score=437)	Regulation	SRX1334492	level 1	Prostate	H.sapiens
hsa-mir-1284	chr3: 71542089	chr3: 71545497-71545629(score=469)	Regulation	SRX101131	level 1	Prostate	H.sapiens
hsa-mir-1284	chr3: 71542089	chr3: 71545510-71545588(score=354)	Regulation	SRX220091	level 1	Prostate	H.sapiens
hsa-mir-1284	chr3: 71542089	chr3: 71545511-71545630(score=379)	Regulation	SRX220080	level 1	Prostate	H.sapiens
hsa-mir-1284	chr3: 71542089	chr3: 71545516-71545609(score=360)	Regulation	SRX383816	level 1	Prostate	H.sapiens
hsa-mir-1284	chr3: 71542089	chr3: 71545523-71545586(score=305)	Regulation	SRX220079	level 1	Prostate	H.sapiens
hsa-mir-1284	chr3: 71542089	chr3: 71545525-71545584(score=361)	Regulation	SRX220092	level 1	Prostate	H.sapiens
hsa-mir-1284	chr3: 71543557(NM_001244816)	chr3: 71542685-71542835(score=328)	Regulation	SRX734410	level 1	Prostate	H.sapiens
hsa-mir-1284	chr3: 71543557(NM_001244816)	chr3: 71542732-71542874(score=468)	Regulation	SRX734411	level 1	Prostate	H.sapiens
hsa-mir-1284	chr3: 71543557(NM_001244816)	chr3: 71545386-71545706(score=1000)	Regulation	SRX471208	level 1	Prostate	H.sapiens
hsa-mir-1284	chr3: 71543557(NM_001244816)	chr3: 71545387-71545689(score=360)	Regulation	SRX1569768	level 1	Prostate	H.sapiens
hsa-mir-1284	chr3: 71543557(NM_001244816)	chr3: 71545411-71545689(score=1000)	Regulation	SRX734410	level 1	Prostate	H.sapiens
hsa-mir-1284	chr3: 71543557(NM_001244816)	chr3: 71545413-71545735(score=862)	Regulation	SRX847034	level 1	Prostate	H.sapiens
hsa-mir-1284	chr3: 71543557(NM_001244816)	chr3: 71545425-71545660(score=965)	Regulation	SRX847035	level 1	Prostate	H.sapiens
hsa-mir-1284	chr3: 71543557(NM_001244816)	chr3: 71545427-71545669(score=634)	Regulation	SRX502070	level 1	Prostate	H.sapiens
hsa-mir-1284	chr3: 71543557(NM_001244816)	chr3: 71545439-71545710(score=415)	Regulation	SRX1569781	level 1	Prostate	H.sapiens
hsa-mir-1284	chr3: 71543557(NM_001244816)	chr3: 71545440-71545654(score=1000)	Regulation	SRX101130	level 1	Prostate	H.sapiens
hsa-mir-1284	chr3: 71543557(NM_001244816)	chr3: 71545446-71545649(score=806)	Regulation	SRX1818077	level 1	Prostate	H.sapiens
hsa-mir-1284	chr3: 71543557(NM_001244816)	chr3: 71545447-71545679(score=1000)	Regulation	SRX383815	level 1	Prostate	H.sapiens
hsa-mir-1284	chr3: 71543557(NM_001244816)	chr3: 71545447-71545706(score=394)	Regulation	SRX595690	level 1	Prostate	H.sapiens
hsa-mir-1284	chr3: 71543557(NM_001244816)	chr3: 71545450-71545635(score=577)	Regulation	SRX1818075	level 1	Prostate	H.sapiens
hsa-mir-1284	chr3: 71543557(NM_001244816)	chr3: 71545460-71545665(score=712)	Regulation	SRX734409	level 1	Prostate	H.sapiens
hsa-mir-1284	chr3: 71543557(NM_001244816)	chr3: 71545460-71545668(score=670)	Regulation	SRX059704	level 1	Prostate	H.sapiens
hsa-mir-1284	chr3: 71543557(NM_001244816)	chr3: 71545461-71545600(score=341)	Regulation	SRX502063	level 1	Prostate	H.sapiens
hsa-mir-1284	chr3: 71543557(NM_001244816)	chr3: 71545461-71545623(score=574)	Regulation	SRX734411	level 1	Prostate	H.sapiens
hsa-mir-1284	chr3: 71543557(NM_001244816)	chr3: 71545461-71545624(score=372)	Regulation	SRX502057	level 1	Prostate	H.sapiens
hsa-mir-1284	chr3: 71543557(NM_001244816)	chr3: 71545461-71545637(score=585)	Regulation	SRX173202	level 1	Prostate	H.sapiens
hsa-mir-1284	chr3: 71543557(NM_001244816)	chr3: 71545461-71545658(score=574)	Regulation	SRX667983	level 1	Prostate	H.sapiens
hsa-mir-1284	chr3: 71543557(NM_001244816)	chr3: 71545462-71545674(score=492)	Regulation	SRX2545039	level 1	Prostate	H.sapiens
hsa-mir-1284	chr3: 71543557(NM_001244816)	chr3: 71545464-71545651(score=1000)	Regulation	SRX101132	level 1	Prostate	H.sapiens
hsa-mir-1284	chr3: 71543557(NM_001244816)	chr3: 71545473-71545664(score=556)	Regulation	SRX471849	level 1	Prostate	H.sapiens
hsa-mir-1284	chr3: 71543557(NM_001244816)	chr3: 71545475-71545631(score=761)	Regulation	SRX101135	level 1	Prostate	H.sapiens
hsa-mir-1284	chr3: 71543557(NM_001244816)	chr3: 71545476-71545615(score=519)	Regulation	SRX497604	level 1	Prostate	H.sapiens
hsa-mir-1284	chr3: 71543557(NM_001244816)	chr3: 71545476-71545642(score=606)	Regulation	SRX101137	level 1	Prostate	H.sapiens
hsa-mir-1284	chr3: 71543557(NM_001244816)	chr3: 71545476-71545644(score=679)	Regulation	SRX101133	level 1	Prostate	H.sapiens
hsa-mir-1284	chr3: 71543557(NM_001244816)	chr3: 71545480-71545655(score=468)	Regulation	SRX667982	level 1	Prostate	H.sapiens
hsa-mir-1284	chr3: 71543557(NM_001244816)	chr3: 71545484-71545631(score=430)	Regulation	SRX734412	level 1	Prostate	H.sapiens
hsa-mir-1284	chr3: 71543557(NM_001244816)	chr3: 71545485-71545621(score=491)	Regulation	SRX101136	level 1	Prostate	H.sapiens
hsa-mir-1284	chr3: 71543557(NM_001244816)	chr3: 71545488-71545634(score=556)	Regulation	SRX1334494	level 1	Prostate	H.sapiens
hsa-mir-1284	chr3: 71543557(NM_001244816)	chr3: 71545489-71545665(score=498)	Regulation	SRX471207	level 1	Prostate	H.sapiens
hsa-mir-1284	chr3: 71543557(NM_001244816)	chr3: 71545493-71545588(score=437)	Regulation	SRX1334492	level 1	Prostate	H.sapiens
hsa-mir-1284	chr3: 71543557(NM_001244816)	chr3: 71545497-71545629(score=469)	Regulation	SRX101131	level 1	Prostate	H.sapiens
hsa-mir-1284	chr3: 71543557(NM_001244816)	chr3: 71545510-71545588(score=354)	Regulation	SRX220091	level 1	Prostate	H.sapiens
hsa-mir-1284	chr3: 71543557(NM_001244816)	chr3: 71545511-71545630(score=379)	Regulation	SRX220080	level 1	Prostate	H.sapiens
hsa-mir-1284	chr3: 71543557(NM_001244816)	chr3: 71545516-71545609(score=360)	Regulation	SRX383816	level 1	Prostate	H.sapiens
hsa-mir-1284	chr3: 71543557(NM_001244816)	chr3: 71545523-71545586(score=305)	Regulation	SRX220079	level 1	Prostate	H.sapiens
hsa-mir-1284	chr3: 71543557(NM_001244816)	chr3: 71545525-71545584(score=361)	Regulation	SRX220092	level 1	Prostate	H.sapiens
hsa-mir-1284	chr3: 71583753(NM_001244808)	chr3: 71586402-71586656(score=683)	Regulation	SRX667983	level 1	Prostate	H.sapiens
hsa-mir-1284	chr3: 71583753(NM_001244808)	chr3: 71586414-71586680(score=1000)	Regulation	SRX173202	level 1	Prostate	H.sapiens
hsa-mir-1284	chr3: 71583753(NM_001244808)	chr3: 71586422-71586652(score=881)	Regulation	SRX667982	level 1	Prostate	H.sapiens
hsa-mir-1284	chr3: 71583753(NM_001244808)	chr3: 71586453-71586619(score=404)	Regulation	SRX1950172	level 1	Prostate	H.sapiens
hsa-mir-1284	chr3: 71583753(NM_001244808)	chr3: 71586460-71586632(score=696)	Regulation	SRX497604	level 1	Prostate	H.sapiens
hsa-mir-1284	chr3: 71583753(NM_001244808)	chr3: 71586464-71586643(score=528)	Regulation	SRX059704	level 1	Prostate	H.sapiens
hsa-mir-1284	chr3: 71583753(NM_001244808)	chr3: 71586481-71586610(score=493)	Regulation	SRX173201	level 1	Prostate	H.sapiens
hsa-mir-1284	chr3: 71583753(NM_001349338)	chr3: 71586402-71586656(score=683)	Regulation	SRX667983	level 1	Prostate	H.sapiens
hsa-mir-1284	chr3: 71583753(NM_001349338)	chr3: 71586414-71586680(score=1000)	Regulation	SRX173202	level 1	Prostate	H.sapiens
hsa-mir-1284	chr3: 71583753(NM_001349338)	chr3: 71586422-71586652(score=881)	Regulation	SRX667982	level 1	Prostate	H.sapiens
hsa-mir-1284	chr3: 71583753(NM_001349338)	chr3: 71586453-71586619(score=404)	Regulation	SRX1950172	level 1	Prostate	H.sapiens
hsa-mir-1284	chr3: 71583753(NM_001349338)	chr3: 71586460-71586632(score=696)	Regulation	SRX497604	level 1	Prostate	H.sapiens
hsa-mir-1284	chr3: 71583753(NM_001349338)	chr3: 71586464-71586643(score=528)	Regulation	SRX059704	level 1	Prostate	H.sapiens
hsa-mir-1284	chr3: 71583753(NM_001349338)	chr3: 71586481-71586610(score=493)	Regulation	SRX173201	level 1	Prostate	H.sapiens
hsa-mir-1284	chr3: 71583753(NM_001349339)	chr3: 71586402-71586656(score=683)	Regulation	SRX667983	level 1	Prostate	H.sapiens
hsa-mir-1284	chr3: 71583753(NM_001349339)	chr3: 71586414-71586680(score=1000)	Regulation	SRX173202	level 1	Prostate	H.sapiens
hsa-mir-1284	chr3: 71583753(NM_001349339)	chr3: 71586422-71586652(score=881)	Regulation	SRX667982	level 1	Prostate	H.sapiens
hsa-mir-1284	chr3: 71583753(NM_001349339)	chr3: 71586453-71586619(score=404)	Regulation	SRX1950172	level 1	Prostate	H.sapiens
hsa-mir-1284	chr3: 71583753(NM_001349339)	chr3: 71586460-71586632(score=696)	Regulation	SRX497604	level 1	Prostate	H.sapiens
hsa-mir-1284	chr3: 71583753(NM_001349339)	chr3: 71586464-71586643(score=528)	Regulation	SRX059704	level 1	Prostate	H.sapiens
hsa-mir-1284	chr3: 71583753(NM_001349339)	chr3: 71586481-71586610(score=493)	Regulation	SRX173201	level 1	Prostate	H.sapiens
hsa-mir-1284	chr3: 71583753(NM_001349340)	chr3: 71586402-71586656(score=683)	Regulation	SRX667983	level 1	Prostate	H.sapiens
hsa-mir-1284	chr3: 71583753(NM_001349340)	chr3: 71586414-71586680(score=1000)	Regulation	SRX173202	level 1	Prostate	H.sapiens
hsa-mir-1284	chr3: 71583753(NM_001349340)	chr3: 71586422-71586652(score=881)	Regulation	SRX667982	level 1	Prostate	H.sapiens
hsa-mir-1284	chr3: 71583753(NM_001349340)	chr3: 71586453-71586619(score=404)	Regulation	SRX1950172	level 1	Prostate	H.sapiens
hsa-mir-1284	chr3: 71583753(NM_001349340)	chr3: 71586460-71586632(score=696)	Regulation	SRX497604	level 1	Prostate	H.sapiens
hsa-mir-1284	chr3: 71583753(NM_001349340)	chr3: 71586464-71586643(score=528)	Regulation	SRX059704	level 1	Prostate	H.sapiens
hsa-mir-1284	chr3: 71583753(NM_001349340)	chr3: 71586481-71586610(score=493)	Regulation	SRX173201	level 1	Prostate	H.sapiens
hsa-mir-1284	chr3: 71583753(NM_001349341)	chr3: 71586402-71586656(score=683)	Regulation	SRX667983	level 1	Prostate	H.sapiens
hsa-mir-1284	chr3: 71583753(NM_001349341)	chr3: 71586414-71586680(score=1000)	Regulation	SRX173202	level 1	Prostate	H.sapiens
hsa-mir-1284	chr3: 71583753(NM_001349341)	chr3: 71586422-71586652(score=881)	Regulation	SRX667982	level 1	Prostate	H.sapiens
hsa-mir-1284	chr3: 71583753(NM_001349341)	chr3: 71586453-71586619(score=404)	Regulation	SRX1950172	level 1	Prostate	H.sapiens
hsa-mir-1284	chr3: 71583753(NM_001349341)	chr3: 71586460-71586632(score=696)	Regulation	SRX497604	level 1	Prostate	H.sapiens
hsa-mir-1284	chr3: 71583753(NM_001349341)	chr3: 71586464-71586643(score=528)	Regulation	SRX059704	level 1	Prostate	H.sapiens
hsa-mir-1284	chr3: 71583753(NM_001349341)	chr3: 71586481-71586610(score=493)	Regulation	SRX173201	level 1	Prostate	H.sapiens
hsa-mir-1284	chr3: 71583753(NR_146142)	chr3: 71586402-71586656(score=683)	Regulation	SRX667983	level 1	Prostate	H.sapiens
hsa-mir-1284	chr3: 71583753(NR_146142)	chr3: 71586414-71586680(score=1000)	Regulation	SRX173202	level 1	Prostate	H.sapiens
hsa-mir-1284	chr3: 71583753(NR_146142)	chr3: 71586422-71586652(score=881)	Regulation	SRX667982	level 1	Prostate	H.sapiens
hsa-mir-1284	chr3: 71583753(NR_146142)	chr3: 71586453-71586619(score=404)	Regulation	SRX1950172	level 1	Prostate	H.sapiens
hsa-mir-1284	chr3: 71583753(NR_146142)	chr3: 71586460-71586632(score=696)	Regulation	SRX497604	level 1	Prostate	H.sapiens
hsa-mir-1284	chr3: 71583753(NR_146142)	chr3: 71586464-71586643(score=528)	Regulation	SRX059704	level 1	Prostate	H.sapiens
hsa-mir-1284	chr3: 71583753(NR_146142)	chr3: 71586481-71586610(score=493)	Regulation	SRX173201	level 1	Prostate	H.sapiens
hsa-mir-1284	chr3: 71583753(NR_146143)	chr3: 71586402-71586656(score=683)	Regulation	SRX667983	level 1	Prostate	H.sapiens
hsa-mir-1284	chr3: 71583753(NR_146143)	chr3: 71586414-71586680(score=1000)	Regulation	SRX173202	level 1	Prostate	H.sapiens
hsa-mir-1284	chr3: 71583753(NR_146143)	chr3: 71586422-71586652(score=881)	Regulation	SRX667982	level 1	Prostate	H.sapiens
hsa-mir-1284	chr3: 71583753(NR_146143)	chr3: 71586453-71586619(score=404)	Regulation	SRX1950172	level 1	Prostate	H.sapiens
hsa-mir-1284	chr3: 71583753(NR_146143)	chr3: 71586460-71586632(score=696)	Regulation	SRX497604	level 1	Prostate	H.sapiens
hsa-mir-1284	chr3: 71583753(NR_146143)	chr3: 71586464-71586643(score=528)	Regulation	SRX059704	level 1	Prostate	H.sapiens
hsa-mir-1284	chr3: 71583753(NR_146143)	chr3: 71586481-71586610(score=493)	Regulation	SRX173201	level 1	Prostate	H.sapiens
hsa-mir-1284	chr3: 71583989(NM_001012505)	chr3: 71586402-71586656(score=683)	Regulation	SRX667983	level 1	Prostate	H.sapiens
hsa-mir-1284	chr3: 71583989(NM_001012505)	chr3: 71586414-71586680(score=1000)	Regulation	SRX173202	level 1	Prostate	H.sapiens
hsa-mir-1284	chr3: 71583989(NM_001012505)	chr3: 71586422-71586652(score=881)	Regulation	SRX667982	level 1	Prostate	H.sapiens
hsa-mir-1284	chr3: 71583989(NM_001012505)	chr3: 71586453-71586619(score=404)	Regulation	SRX1950172	level 1	Prostate	H.sapiens
hsa-mir-1284	chr3: 71583989(NM_001012505)	chr3: 71586460-71586632(score=696)	Regulation	SRX497604	level 1	Prostate	H.sapiens
hsa-mir-1284	chr3: 71583989(NM_001012505)	chr3: 71586464-71586643(score=528)	Regulation	SRX059704	level 1	Prostate	H.sapiens
hsa-mir-1284	chr3: 71583989(NM_001012505)	chr3: 71586481-71586610(score=493)	Regulation	SRX173201	level 1	Prostate	H.sapiens
hsa-mir-1284	chr3: 71583989(NM_001244810)	chr3: 71586402-71586656(score=683)	Regulation	SRX667983	level 1	Prostate	H.sapiens
hsa-mir-1284	chr3: 71583989(NM_001244810)	chr3: 71586414-71586680(score=1000)	Regulation	SRX173202	level 1	Prostate	H.sapiens
hsa-mir-1284	chr3: 71583989(NM_001244810)	chr3: 71586422-71586652(score=881)	Regulation	SRX667982	level 1	Prostate	H.sapiens
hsa-mir-1284	chr3: 71583989(NM_001244810)	chr3: 71586453-71586619(score=404)	Regulation	SRX1950172	level 1	Prostate	H.sapiens
hsa-mir-1284	chr3: 71583989(NM_001244810)	chr3: 71586460-71586632(score=696)	Regulation	SRX497604	level 1	Prostate	H.sapiens
hsa-mir-1284	chr3: 71583989(NM_001244810)	chr3: 71586464-71586643(score=528)	Regulation	SRX059704	level 1	Prostate	H.sapiens
hsa-mir-1284	chr3: 71583989(NM_001244810)	chr3: 71586481-71586610(score=493)	Regulation	SRX173201	level 1	Prostate	H.sapiens
hsa-mir-1284	chr3: 71583989(NM_032682)	chr3: 71586402-71586656(score=683)	Regulation	SRX667983	level 1	Prostate	H.sapiens
hsa-mir-1284	chr3: 71583989(NM_032682)	chr3: 71586414-71586680(score=1000)	Regulation	SRX173202	level 1	Prostate	H.sapiens
hsa-mir-1284	chr3: 71583989(NM_032682)	chr3: 71586422-71586652(score=881)	Regulation	SRX667982	level 1	Prostate	H.sapiens
hsa-mir-1284	chr3: 71583989(NM_032682)	chr3: 71586453-71586619(score=404)	Regulation	SRX1950172	level 1	Prostate	H.sapiens
hsa-mir-1284	chr3: 71583989(NM_032682)	chr3: 71586460-71586632(score=696)	Regulation	SRX497604	level 1	Prostate	H.sapiens
hsa-mir-1284	chr3: 71583989(NM_032682)	chr3: 71586464-71586643(score=528)	Regulation	SRX059704	level 1	Prostate	H.sapiens
hsa-mir-1284	chr3: 71583989(NM_032682)	chr3: 71586481-71586610(score=493)	Regulation	SRX173201	level 1	Prostate	H.sapiens
hsa-mir-1285-1	chr7: 92245914	chr7: 92245856-92246061(score=372)	Regulation	SRX734410	level 2	Prostate	H.sapiens
hsa-mir-1285-1	chr7: 92245914	chr7: 92245895-92246078(score=261)	Regulation	SRX734411	level 2	Prostate	H.sapiens
hsa-mir-1285-1	chr7: 92245914	chr7: 92245902-92246046(score=288)	Regulation	SRX734409	level 2	Prostate	H.sapiens
hsa-mir-1285-1	chr7: 92245914	chr7: 92245912-92246049(score=269)	Regulation	SRX734412	level 2	Prostate	H.sapiens
hsa-mir-1287	chr10: 98395307	chr10: 98396275-98396388(score=393)	Regulation	SRX306516	level 1	Prostate	H.sapiens
hsa-mir-1287	chr10: 98395307	chr10: 98399543-98399871(score=420)	Regulation	SRX173202	level 1	Prostate	H.sapiens
hsa-mir-1287	chr10: 98395307	chr10: 98399576-98399894(score=528)	Regulation	SRX1569767	level 1	Prostate	H.sapiens
hsa-mir-1287	chr10: 98395307	chr10: 98399576-98399894(score=529)	Regulation	SRX595671	level 1	Prostate	H.sapiens
hsa-mir-1287	chr10: 98395307	chr10: 98399590-98399809(score=326)	Regulation	SRX1950171	level 1	Prostate	H.sapiens
hsa-mir-1287	chr10: 98395307	chr10: 98399609-98399779(score=273)	Regulation	SRX1950172	level 1	Prostate	H.sapiens
hsa-mir-1287	chr10: 98395307	chr10: 98399662-98399831(score=424)	Regulation	SRX101130	level 1	Prostate	H.sapiens
hsa-mir-1287	chr10: 98395307	chr10: 98399688-98399815(score=337)	Regulation	SRX101132	level 1	Prostate	H.sapiens
hsa-mir-1288	chr17: 16217195(NM_004278)	chr17: 16215508-16215683(score=453)	Regulation	SRX734410	level 1	Prostate	H.sapiens
hsa-mir-1288	chr17: 16217195(NM_004278)	chr17: 16215528-16215700(score=340)	Regulation	SRX734411	level 1	Prostate	H.sapiens
hsa-mir-129-2	chr11: 43581394	chr11: 43578898-43579096(score=1000)	Regulation	SRX433201	level 1	Prostate	H.sapiens
hsa-mir-129-2	chr11: 43581394	chr11: 43578909-43579099(score=873)	Regulation	SRX433202	level 1	Prostate	H.sapiens
hsa-mir-1290	chr1: 18902799(NM_001319218)	chr1: 18903130-18903600(score=612)	Regulation	SRX734411	level 1	Prostate	H.sapiens
hsa-mir-1290	chr1: 18902799(NM_001319218)	chr1: 18903131-18903626(score=1000)	Regulation	SRX734410	level 1	Prostate	H.sapiens
hsa-mir-1290	chr1: 18902799(NM_001319218)	chr1: 18903137-18903282(score=344)	Regulation	SRX734409	level 1	Prostate	H.sapiens
hsa-mir-1290	chr1: 18902799(NM_001319218)	chr1: 18903159-18903307(score=343)	Regulation	SRX734412	level 1	Prostate	H.sapiens
hsa-mir-1290	chr1: 18902799(NM_001319218)	chr1: 18903257-18903681(score=498)	Regulation	SRX1569767	level 1	Prostate	H.sapiens
hsa-mir-1290	chr1: 18902799(NM_001319218)	chr1: 18903257-18903681(score=498)	Regulation	SRX595671	level 1	Prostate	H.sapiens
hsa-mir-1290	chr1: 18902799(NM_001319218)	chr1: 18903309-18903580(score=404)	Regulation	SRX595677	level 1	Prostate	H.sapiens
hsa-mir-1290	chr1: 18902799(NM_001319218)	chr1: 18903354-18903576(score=601)	Regulation	SRX059704	level 1	Prostate	H.sapiens
hsa-mir-1290	chr1: 18902799(NM_001319218)	chr1: 18903365-18903598(score=681)	Regulation	SRX471208	level 1	Prostate	H.sapiens
hsa-mir-1290	chr1: 18902799(NM_001319218)	chr1: 18903376-18903605(score=967)	Regulation	SRX173202	level 1	Prostate	H.sapiens
hsa-mir-1290	chr1: 18902799(NM_001319218)	chr1: 18903380-18903591(score=470)	Regulation	SRX734409	level 1	Prostate	H.sapiens
hsa-mir-1290	chr1: 18902799(NM_001319218)	chr1: 18903380-18903621(score=626)	Regulation	SRX847034	level 1	Prostate	H.sapiens
hsa-mir-1290	chr1: 18902799(NM_001319218)	chr1: 18903395-18903581(score=726)	Regulation	SRX101130	level 1	Prostate	H.sapiens
hsa-mir-1290	chr1: 18902799(NM_001319218)	chr1: 18903403-18903580(score=817)	Regulation	SRX383815	level 1	Prostate	H.sapiens
hsa-mir-1290	chr1: 18902799(NM_001319218)	chr1: 18903407-18903573(score=701)	Regulation	SRX101132	level 1	Prostate	H.sapiens
hsa-mir-1290	chr1: 18902799(NM_001319218)	chr1: 18903407-18903574(score=437)	Regulation	SRX847035	level 1	Prostate	H.sapiens
hsa-mir-1290	chr1: 18902799(NM_001319218)	chr1: 18903407-18903596(score=437)	Regulation	SRX471849	level 1	Prostate	H.sapiens
hsa-mir-1290	chr1: 18902799(NM_001319218)	chr1: 18903436-18903551(score=417)	Regulation	SRX101135	level 1	Prostate	H.sapiens
hsa-mir-1290	chr1: 18902799(NM_001319218)	chr1: 18903436-18903578(score=456)	Regulation	SRX734412	level 1	Prostate	H.sapiens
hsa-mir-1290	chr1: 18902799(NM_001319218)	chr1: 18903437-18903556(score=392)	Regulation	SRX101133	level 1	Prostate	H.sapiens
hsa-mir-1290	chr1: 18902799(NM_001319218)	chr1: 18903442-18903556(score=422)	Regulation	SRX497604	level 1	Prostate	H.sapiens
hsa-mir-1290	chr1: 18902799(NM_003748)	chr1: 18903130-18903600(score=612)	Regulation	SRX734411	level 1	Prostate	H.sapiens
hsa-mir-1290	chr1: 18902799(NM_003748)	chr1: 18903131-18903626(score=1000)	Regulation	SRX734410	level 1	Prostate	H.sapiens
hsa-mir-1290	chr1: 18902799(NM_003748)	chr1: 18903137-18903282(score=344)	Regulation	SRX734409	level 1	Prostate	H.sapiens
hsa-mir-1290	chr1: 18902799(NM_003748)	chr1: 18903159-18903307(score=343)	Regulation	SRX734412	level 1	Prostate	H.sapiens
hsa-mir-1290	chr1: 18902799(NM_003748)	chr1: 18903257-18903681(score=498)	Regulation	SRX1569767	level 1	Prostate	H.sapiens
hsa-mir-1290	chr1: 18902799(NM_003748)	chr1: 18903257-18903681(score=498)	Regulation	SRX595671	level 1	Prostate	H.sapiens
hsa-mir-1290	chr1: 18902799(NM_003748)	chr1: 18903309-18903580(score=404)	Regulation	SRX595677	level 1	Prostate	H.sapiens
hsa-mir-1290	chr1: 18902799(NM_003748)	chr1: 18903354-18903576(score=601)	Regulation	SRX059704	level 1	Prostate	H.sapiens
hsa-mir-1290	chr1: 18902799(NM_003748)	chr1: 18903365-18903598(score=681)	Regulation	SRX471208	level 1	Prostate	H.sapiens
hsa-mir-1290	chr1: 18902799(NM_003748)	chr1: 18903376-18903605(score=967)	Regulation	SRX173202	level 1	Prostate	H.sapiens
hsa-mir-1290	chr1: 18902799(NM_003748)	chr1: 18903380-18903591(score=470)	Regulation	SRX734409	level 1	Prostate	H.sapiens
hsa-mir-1290	chr1: 18902799(NM_003748)	chr1: 18903380-18903621(score=626)	Regulation	SRX847034	level 1	Prostate	H.sapiens
hsa-mir-1290	chr1: 18902799(NM_003748)	chr1: 18903395-18903581(score=726)	Regulation	SRX101130	level 1	Prostate	H.sapiens
hsa-mir-1290	chr1: 18902799(NM_003748)	chr1: 18903403-18903580(score=817)	Regulation	SRX383815	level 1	Prostate	H.sapiens
hsa-mir-1290	chr1: 18902799(NM_003748)	chr1: 18903407-18903573(score=701)	Regulation	SRX101132	level 1	Prostate	H.sapiens
hsa-mir-1290	chr1: 18902799(NM_003748)	chr1: 18903407-18903574(score=437)	Regulation	SRX847035	level 1	Prostate	H.sapiens
hsa-mir-1290	chr1: 18902799(NM_003748)	chr1: 18903407-18903596(score=437)	Regulation	SRX471849	level 1	Prostate	H.sapiens
hsa-mir-1290	chr1: 18902799(NM_003748)	chr1: 18903436-18903551(score=417)	Regulation	SRX101135	level 1	Prostate	H.sapiens
hsa-mir-1290	chr1: 18902799(NM_003748)	chr1: 18903436-18903578(score=456)	Regulation	SRX734412	level 1	Prostate	H.sapiens
hsa-mir-1290	chr1: 18902799(NM_003748)	chr1: 18903437-18903556(score=392)	Regulation	SRX101133	level 1	Prostate	H.sapiens
hsa-mir-1290	chr1: 18902799(NM_003748)	chr1: 18903442-18903556(score=422)	Regulation	SRX497604	level 1	Prostate	H.sapiens
hsa-mir-1290	chr1: 18902799(NM_170726)	chr1: 18903130-18903600(score=612)	Regulation	SRX734411	level 1	Prostate	H.sapiens
hsa-mir-1290	chr1: 18902799(NM_170726)	chr1: 18903131-18903626(score=1000)	Regulation	SRX734410	level 1	Prostate	H.sapiens
hsa-mir-1290	chr1: 18902799(NM_170726)	chr1: 18903137-18903282(score=344)	Regulation	SRX734409	level 1	Prostate	H.sapiens
hsa-mir-1290	chr1: 18902799(NM_170726)	chr1: 18903159-18903307(score=343)	Regulation	SRX734412	level 1	Prostate	H.sapiens
hsa-mir-1290	chr1: 18902799(NM_170726)	chr1: 18903257-18903681(score=498)	Regulation	SRX1569767	level 1	Prostate	H.sapiens
hsa-mir-1290	chr1: 18902799(NM_170726)	chr1: 18903257-18903681(score=498)	Regulation	SRX595671	level 1	Prostate	H.sapiens
hsa-mir-1290	chr1: 18902799(NM_170726)	chr1: 18903309-18903580(score=404)	Regulation	SRX595677	level 1	Prostate	H.sapiens
hsa-mir-1290	chr1: 18902799(NM_170726)	chr1: 18903354-18903576(score=601)	Regulation	SRX059704	level 1	Prostate	H.sapiens
hsa-mir-1290	chr1: 18902799(NM_170726)	chr1: 18903365-18903598(score=681)	Regulation	SRX471208	level 1	Prostate	H.sapiens
hsa-mir-1290	chr1: 18902799(NM_170726)	chr1: 18903376-18903605(score=967)	Regulation	SRX173202	level 1	Prostate	H.sapiens
hsa-mir-1290	chr1: 18902799(NM_170726)	chr1: 18903380-18903591(score=470)	Regulation	SRX734409	level 1	Prostate	H.sapiens
hsa-mir-1290	chr1: 18902799(NM_170726)	chr1: 18903380-18903621(score=626)	Regulation	SRX847034	level 1	Prostate	H.sapiens
hsa-mir-1290	chr1: 18902799(NM_170726)	chr1: 18903395-18903581(score=726)	Regulation	SRX101130	level 1	Prostate	H.sapiens
hsa-mir-1290	chr1: 18902799(NM_170726)	chr1: 18903403-18903580(score=817)	Regulation	SRX383815	level 1	Prostate	H.sapiens
hsa-mir-1290	chr1: 18902799(NM_170726)	chr1: 18903407-18903573(score=701)	Regulation	SRX101132	level 1	Prostate	H.sapiens
hsa-mir-1290	chr1: 18902799(NM_170726)	chr1: 18903407-18903574(score=437)	Regulation	SRX847035	level 1	Prostate	H.sapiens
hsa-mir-1290	chr1: 18902799(NM_170726)	chr1: 18903407-18903596(score=437)	Regulation	SRX471849	level 1	Prostate	H.sapiens
hsa-mir-1290	chr1: 18902799(NM_170726)	chr1: 18903436-18903551(score=417)	Regulation	SRX101135	level 1	Prostate	H.sapiens
hsa-mir-1290	chr1: 18902799(NM_170726)	chr1: 18903436-18903578(score=456)	Regulation	SRX734412	level 1	Prostate	H.sapiens
hsa-mir-1290	chr1: 18902799(NM_170726)	chr1: 18903437-18903556(score=392)	Regulation	SRX101133	level 1	Prostate	H.sapiens
hsa-mir-1290	chr1: 18902799(NM_170726)	chr1: 18903442-18903556(score=422)	Regulation	SRX497604	level 1	Prostate	H.sapiens
hsa-mir-1291	chr12: 48682238	chr12: 48682195-48682331(score=311)	Regulation	SRX734411	level 2	Prostate	H.sapiens
hsa-mir-1292	chr20: 2652632	chr20: 2652394-2652659(score=604)	Regulation	SRX734411	level 2	Prostate	H.sapiens
hsa-mir-1292	chr20: 2652632	chr20: 2652403-2652630(score=477)	Regulation	SRX734409	level 2	Prostate	H.sapiens
hsa-mir-1292	chr20: 2652632	chr20: 2652424-2652585(score=363)	Regulation	SRX734412	level 2	Prostate	H.sapiens
hsa-mir-1292	chr20: 2652532(NM_006392)	chr20: 2652304-2652629(score=532)	Regulation	SRX734410	level 1	Prostate	H.sapiens
hsa-mir-1292	chr20: 2652532(NR_027700)	chr20: 2652304-2652629(score=532)	Regulation	SRX734410	level 1	Prostate	H.sapiens
hsa-mir-1292	chr20: 2652532(NR_145428)	chr20: 2652304-2652629(score=532)	Regulation	SRX734410	level 1	Prostate	H.sapiens
hsa-mir-1292	chr20: 2652777	chr20: 2652304-2652629(score=532)	Regulation	SRX734410	level 1	Prostate	H.sapiens
hsa-mir-1293	chr12: 50283520	chr12: 50283445-50283748(score=473)	Regulation	SRX734411	level 2	Prostate	H.sapiens
hsa-mir-1293	chr12: 50283520	chr12: 50283550-50283704(score=340)	Regulation	SRX734412	level 2	Prostate	H.sapiens
hsa-mir-1294	chr5: 154190735	chr5: 154190689-154190811(score=356)	Regulation	SRX734411	level 2	Prostate	H.sapiens
hsa-mir-1294	chr5: 154190735(NM_198321)	chr5: 154186445-154186640(score=491)	Regulation	SRX306517	level 1	Prostate	H.sapiens
hsa-mir-1294	chr5: 154190735(NM_198321)	chr5: 154186462-154186754(score=583)	Regulation	SRX667982	level 1	Prostate	H.sapiens
hsa-mir-1294	chr5: 154190735(NM_198321)	chr5: 154186465-154186742(score=708)	Regulation	SRX667983	level 1	Prostate	H.sapiens
hsa-mir-1294	chr5: 154190735(NM_198321)	chr5: 154186556-154186736(score=506)	Regulation	SRX471208	level 1	Prostate	H.sapiens
hsa-mir-1294	chr5: 154190735(NM_198321)	chr5: 154186557-154186738(score=507)	Regulation	SRX173202	level 1	Prostate	H.sapiens
hsa-mir-1294	chr5: 154190735(NM_198321)	chr5: 154186585-154186714(score=360)	Regulation	SRX101130	level 1	Prostate	H.sapiens
hsa-mir-1294	chr5: 154190735(NM_198321)	chr5: 154186585-154186746(score=1000)	Regulation	SRX497604	level 1	Prostate	H.sapiens
hsa-mir-1296	chr10: 63465977	chr10: 63465941-63466093(score=325)	Regulation	SRX734410	level 2	Prostate	H.sapiens
hsa-mir-1296	chr10: 63465977	chr10: 63465945-63466111(score=517)	Regulation	SRX734411	level 2	Prostate	H.sapiens
hsa-mir-1301	chr2: 25341915(NM_001320892)	chr2: 25342484-25342626(score=533)	Regulation	SRX2017936	level 1	Prostate	H.sapiens
hsa-mir-1301	chr2: 25341915(NM_022552)	chr2: 25342484-25342626(score=533)	Regulation	SRX2017936	level 1	Prostate	H.sapiens
hsa-mir-1301	chr2: 25342590(NM_175629)	chr2: 25342484-25342626(score=533)	Regulation	SRX2017936	level 1	Prostate	H.sapiens
hsa-mir-1301	chr2: 25342590(NM_175630)	chr2: 25342484-25342626(score=533)	Regulation	SRX2017936	level 1	Prostate	H.sapiens
hsa-mir-1301	chr2: 25342590(NR_135490)	chr2: 25342484-25342626(score=533)	Regulation	SRX2017936	level 1	Prostate	H.sapiens
hsa-mir-1302-10	chr15: 101960596	chr15: 101960575-101960768(score=768)	Regulation	SRX2017936	level 1	Prostate	H.sapiens
hsa-mir-1302-10	chr15: 101960596	chr15: 101961480-101961610(score=666)	Regulation	SRX734411	level 1	Prostate	H.sapiens
hsa-mir-1302-10	chr15: 101960596	chr15: 101961521-101961654(score=438)	Regulation	SRX383815	level 1	Prostate	H.sapiens
hsa-mir-1302-11	chr19: 71973	chr19: 71794-71999(score=923)	Regulation	SRX2017936	level 1	Prostate	H.sapiens
hsa-mir-1302-2	chr1: 30366	chr1: 30200-30377(score=947)	Regulation	SRX2017936	level 1	Prostate	H.sapiens
hsa-mir-1302-3	chr2: 113583096	chr2: 113583103-113583256(score=556)	Regulation	SRX2017936	level 1	Prostate	H.sapiens
hsa-mir-1302-3	chr2: 113583096	chr2: 113583940-113584136(score=831)	Regulation	SRX734412	level 1	Prostate	H.sapiens
hsa-mir-1302-3	chr2: 113583096	chr2: 113583946-113584137(score=735)	Regulation	SRX734410	level 1	Prostate	H.sapiens
hsa-mir-1302-3	chr2: 113583096	chr2: 113583946-113584142(score=880)	Regulation	SRX734411	level 1	Prostate	H.sapiens
hsa-mir-1302-3	chr2: 113583096	chr2: 113583947-113584135(score=613)	Regulation	SRX734409	level 1	Prostate	H.sapiens
hsa-mir-1302-4	chr2: 207269424	chr2: 207268426-207268520(score=450)	Regulation	SRX1334492	level 1	Prostate	H.sapiens
hsa-mir-1302-4	chr2: 207269424	chr2: 207268436-207268540(score=501)	Regulation	SRX1640090	level 1	Prostate	H.sapiens
hsa-mir-1302-4	chr2: 207269424	chr2: 207269008-207269378(score=1000)	Regulation	SRX734410	level 1	Prostate	H.sapiens
hsa-mir-1302-4	chr2: 207269424	chr2: 207269041-207269364(score=1000)	Regulation	SRX471208	level 1	Prostate	H.sapiens
hsa-mir-1302-4	chr2: 207269424	chr2: 207269064-207269294(score=744)	Regulation	SRX101130	level 1	Prostate	H.sapiens
hsa-mir-1302-4	chr2: 207269424	chr2: 207269067-207269310(score=759)	Regulation	SRX101132	level 1	Prostate	H.sapiens
hsa-mir-1302-4	chr2: 207269424	chr2: 207269068-207269213(score=541)	Regulation	SRX101137	level 1	Prostate	H.sapiens
hsa-mir-1302-4	chr2: 207269424	chr2: 207269070-207269249(score=712)	Regulation	SRX101133	level 1	Prostate	H.sapiens
hsa-mir-1302-4	chr2: 207269424	chr2: 207269076-207269226(score=459)	Regulation	SRX101131	level 1	Prostate	H.sapiens
hsa-mir-1302-4	chr2: 207269424	chr2: 207269080-207269213(score=473)	Regulation	SRX101136	level 1	Prostate	H.sapiens
hsa-mir-1302-4	chr2: 207269424	chr2: 207269083-207269328(score=560)	Regulation	SRX847034	level 1	Prostate	H.sapiens
hsa-mir-1302-4	chr2: 207269424	chr2: 207269091-207269310(score=516)	Regulation	SRX734409	level 1	Prostate	H.sapiens
hsa-mir-1302-4	chr2: 207269424	chr2: 207269092-207269272(score=447)	Regulation	SRX1818077	level 1	Prostate	H.sapiens
hsa-mir-1302-4	chr2: 207269424	chr2: 207269095-207269310(score=534)	Regulation	SRX847035	level 1	Prostate	H.sapiens
hsa-mir-1302-4	chr2: 207269424	chr2: 207269096-207269257(score=402)	Regulation	SRX101135	level 1	Prostate	H.sapiens
hsa-mir-1302-4	chr2: 207269424	chr2: 207269103-207269255(score=359)	Regulation	SRX1818075	level 1	Prostate	H.sapiens
hsa-mir-1302-4	chr2: 207269424	chr2: 207269106-207269287(score=531)	Regulation	SRX667983	level 1	Prostate	H.sapiens
hsa-mir-1302-4	chr2: 207269424	chr2: 207269110-207269318(score=663)	Regulation	SRX734412	level 1	Prostate	H.sapiens
hsa-mir-1302-4	chr2: 207269424	chr2: 207269111-207269319(score=764)	Regulation	SRX173202	level 1	Prostate	H.sapiens
hsa-mir-1302-4	chr2: 207269424	chr2: 207269112-207269308(score=670)	Regulation	SRX734411	level 1	Prostate	H.sapiens
hsa-mir-1302-4	chr2: 207269424	chr2: 207269126-207269313(score=461)	Regulation	SRX383815	level 1	Prostate	H.sapiens
hsa-mir-1302-4	chr2: 207269424	chr2: 207269132-207269308(score=466)	Regulation	SRX667982	level 1	Prostate	H.sapiens
hsa-mir-1302-4	chr2: 207269424	chr2: 207269154-207269293(score=381)	Regulation	SRX497604	level 1	Prostate	H.sapiens
hsa-mir-1302-4	chr2: 207269424	chr2: 207269199-207269270(score=293)	Regulation	SRX1334494	level 1	Prostate	H.sapiens
hsa-mir-1302-4	chr2: 207269424	chr2: 207269822-207270084(score=955)	Regulation	SRX734412	level 1	Prostate	H.sapiens
hsa-mir-1302-4	chr2: 207269424	chr2: 207269822-207270132(score=1000)	Regulation	SRX734410	level 1	Prostate	H.sapiens
hsa-mir-1302-4	chr2: 207269424	chr2: 207269832-207270070(score=963)	Regulation	SRX734411	level 1	Prostate	H.sapiens
hsa-mir-1302-4	chr2: 207269424	chr2: 207269835-207270074(score=807)	Regulation	SRX734409	level 1	Prostate	H.sapiens
hsa-mir-1302-4	chr2: 207269424	chr2: 207269846-207270106(score=1000)	Regulation	SRX173202	level 1	Prostate	H.sapiens
hsa-mir-1302-4	chr2: 207269424	chr2: 207269853-207270061(score=883)	Regulation	SRX2017926	level 1	Prostate	H.sapiens
hsa-mir-1302-4	chr2: 207269424	chr2: 207269858-207270079(score=1000)	Regulation	SRX667983	level 1	Prostate	H.sapiens
hsa-mir-1302-4	chr2: 207269424	chr2: 207269859-207270092(score=1000)	Regulation	SRX667982	level 1	Prostate	H.sapiens
hsa-mir-1302-4	chr2: 207269424	chr2: 207269861-207270056(score=1000)	Regulation	SRX101130	level 1	Prostate	H.sapiens
hsa-mir-1302-4	chr2: 207269424	chr2: 207269864-207270068(score=1000)	Regulation	SRX1950172	level 1	Prostate	H.sapiens
hsa-mir-1302-4	chr2: 207269424	chr2: 207269865-207270068(score=1000)	Regulation	SRX101132	level 1	Prostate	H.sapiens
hsa-mir-1302-4	chr2: 207269424	chr2: 207269868-207270093(score=998)	Regulation	SRX059704	level 1	Prostate	H.sapiens
hsa-mir-1302-4	chr2: 207269424	chr2: 207269871-207270053(score=1000)	Regulation	SRX1950171	level 1	Prostate	H.sapiens
hsa-mir-1302-4	chr2: 207269424	chr2: 207269871-207270056(score=1000)	Regulation	SRX1950173	level 1	Prostate	H.sapiens
hsa-mir-1302-4	chr2: 207269424	chr2: 207269872-207270047(score=1000)	Regulation	SRX1950170	level 1	Prostate	H.sapiens
hsa-mir-1302-4	chr2: 207269424	chr2: 207269873-207270034(score=1000)	Regulation	SRX173201	level 1	Prostate	H.sapiens
hsa-mir-1302-4	chr2: 207269424	chr2: 207269875-207270046(score=854)	Regulation	SRX101133	level 1	Prostate	H.sapiens
hsa-mir-1302-4	chr2: 207269424	chr2: 207269876-207270017(score=469)	Regulation	SRX101131	level 1	Prostate	H.sapiens
hsa-mir-1302-4	chr2: 207269424	chr2: 207269876-207270035(score=631)	Regulation	SRX083219	level 1	Prostate	H.sapiens
hsa-mir-1302-4	chr2: 207269424	chr2: 207269876-207270045(score=941)	Regulation	SRX101135	level 1	Prostate	H.sapiens
hsa-mir-1302-4	chr2: 207269424	chr2: 207269876-207270048(score=797)	Regulation	SRX383815	level 1	Prostate	H.sapiens
hsa-mir-1302-4	chr2: 207269424	chr2: 207269881-207270024(score=637)	Regulation	SRX101137	level 1	Prostate	H.sapiens
hsa-mir-1302-4	chr2: 207269424	chr2: 207269881-207270055(score=1000)	Regulation	SRX497604	level 1	Prostate	H.sapiens
hsa-mir-1302-4	chr2: 207269424	chr2: 207269882-207270031(score=597)	Regulation	SRX1818075	level 1	Prostate	H.sapiens
hsa-mir-1302-4	chr2: 207269424	chr2: 207269885-207270007(score=391)	Regulation	SRX1818076	level 1	Prostate	H.sapiens
hsa-mir-1302-4	chr2: 207269424	chr2: 207269885-207270028(score=671)	Regulation	SRX101136	level 1	Prostate	H.sapiens
hsa-mir-1302-4	chr2: 207269424	chr2: 207269889-207270025(score=542)	Regulation	SRX101134	level 1	Prostate	H.sapiens
hsa-mir-1302-4	chr2: 207269424	chr2: 207269891-207270042(score=499)	Regulation	SRX1818077	level 1	Prostate	H.sapiens
hsa-mir-1302-4	chr2: 207269424	chr2: 207269897-207269942(score=225)	Regulation	SRX220080	level 1	Prostate	H.sapiens
hsa-mir-1302-4	chr2: 207269424	chr2: 207269902-207269994(score=433)	Regulation	SRX1334494	level 1	Prostate	H.sapiens
hsa-mir-1302-4	chr2: 207269424	chr2: 207269919-207270004(score=402)	Regulation	SRX1334492	level 1	Prostate	H.sapiens
hsa-mir-1302-5	chr20: 50636918(NM_080829)	chr20: 50638099-50638365(score=1000)	Regulation	SRX433198	level 1	Prostate	H.sapiens
hsa-mir-1302-5	chr20: 50636918(NM_080829)	chr20: 50638124-50638305(score=443)	Regulation	SRX433202	level 1	Prostate	H.sapiens
hsa-mir-1302-5	chr20: 50636918(NM_080829)	chr20: 50638134-50638321(score=498)	Regulation	SRX433201	level 1	Prostate	H.sapiens
hsa-mir-1302-5	chr20: 50636918(NM_080829)	chr20: 50638166-50638330(score=451)	Regulation	SRX433197	level 1	Prostate	H.sapiens
hsa-mir-1302-9	chr9: 30144	chr9: 29956-30155(score=768)	Regulation	SRX2017936	level 1	Prostate	H.sapiens
hsa-mir-1303	chr5: 154685776	chr5: 154682428-154682677(score=1000)	Regulation	SRX2017936	level 1	Prostate	H.sapiens
hsa-mir-1303	chr5: 154685776	chr5: 154682872-154683064(score=724)	Regulation	SRX734411	level 1	Prostate	H.sapiens
hsa-mir-1303	chr5: 154685776	chr5: 154682887-154683051(score=516)	Regulation	SRX734409	level 1	Prostate	H.sapiens
hsa-mir-1303	chr5: 154685776	chr5: 154682894-154683087(score=599)	Regulation	SRX734410	level 1	Prostate	H.sapiens
hsa-mir-1303	chr5: 154685776	chr5: 154686341-154686545(score=619)	Regulation	SRX471208	level 1	Prostate	H.sapiens
hsa-mir-1303	chr5: 154685776	chr5: 154686353-154686526(score=566)	Regulation	SRX173202	level 1	Prostate	H.sapiens
hsa-mir-1303	chr5: 154685776	chr5: 154686376-154686496(score=502)	Regulation	SRX497604	level 1	Prostate	H.sapiens
hsa-mir-1304	chr11: 93741537(NR_146090)	chr11: 93744803-93745235(score=924)	Regulation	SRX667983	level 1	Prostate	H.sapiens
hsa-mir-1304	chr11: 93741537(NR_146090)	chr11: 93744804-93745188(score=1000)	Regulation	SRX667982	level 1	Prostate	H.sapiens
hsa-mir-1304	chr11: 93741537(NR_146090)	chr11: 93744805-93745171(score=814)	Regulation	SRX497604	level 1	Prostate	H.sapiens
hsa-mir-1304	chr11: 93741537(NR_146090)	chr11: 93744817-93745558(score=502)	Regulation	SRX595676	level 1	Prostate	H.sapiens
hsa-mir-1304	chr11: 93741537(NR_146090)	chr11: 93744821-93745591(score=798)	Regulation	SRX595671	level 1	Prostate	H.sapiens
hsa-mir-1304	chr11: 93741537(NR_146090)	chr11: 93744822-93745601(score=812)	Regulation	SRX1569767	level 1	Prostate	H.sapiens
hsa-mir-1304	chr11: 93741537(NR_146090)	chr11: 93744824-93745573(score=1000)	Regulation	SRX173202	level 1	Prostate	H.sapiens
hsa-mir-1304	chr11: 93741537(NR_146090)	chr11: 93744844-93745594(score=633)	Regulation	SRX1569768	level 1	Prostate	H.sapiens
hsa-mir-1304	chr11: 93741537(NR_146090)	chr11: 93744851-93745560(score=1000)	Regulation	SRX471850	level 1	Prostate	H.sapiens
hsa-mir-1304	chr11: 93741537(NR_146090)	chr11: 93744860-93745137(score=871)	Regulation	SRX1950170	level 1	Prostate	H.sapiens
hsa-mir-1304	chr11: 93741537(NR_146090)	chr11: 93744860-93745216(score=996)	Regulation	SRX1950172	level 1	Prostate	H.sapiens
hsa-mir-1304	chr11: 93741537(NR_146090)	chr11: 93744866-93745193(score=798)	Regulation	SRX1950173	level 1	Prostate	H.sapiens
hsa-mir-1304	chr11: 93741537(NR_146090)	chr11: 93744866-93745210(score=827)	Regulation	SRX173201	level 1	Prostate	H.sapiens
hsa-mir-1304	chr11: 93741537(NR_146090)	chr11: 93744868-93745169(score=1000)	Regulation	SRX059704	level 1	Prostate	H.sapiens
hsa-mir-1304	chr11: 93741537(NR_146090)	chr11: 93744870-93745133(score=950)	Regulation	SRX471849	level 1	Prostate	H.sapiens
hsa-mir-1304	chr11: 93741537(NR_146090)	chr11: 93744876-93745145(score=967)	Regulation	SRX1950171	level 1	Prostate	H.sapiens
hsa-mir-1304	chr11: 93741537(NR_146090)	chr11: 93744878-93745097(score=757)	Regulation	SRX471855	level 1	Prostate	H.sapiens
hsa-mir-1304	chr11: 93741537(NR_146090)	chr11: 93744880-93745249(score=665)	Regulation	SRX734410	level 1	Prostate	H.sapiens
hsa-mir-1304	chr11: 93741537(NR_146090)	chr11: 93744884-93745123(score=732)	Regulation	SRX471856	level 1	Prostate	H.sapiens
hsa-mir-1304	chr11: 93741537(NR_146090)	chr11: 93744884-93745132(score=577)	Regulation	SRX471852	level 1	Prostate	H.sapiens
hsa-mir-1304	chr11: 93741537(NR_146090)	chr11: 93744885-93745128(score=705)	Regulation	SRX471851	level 1	Prostate	H.sapiens
hsa-mir-1304	chr11: 93741537(NR_146090)	chr11: 93744885-93745556(score=669)	Regulation	SRX595677	level 1	Prostate	H.sapiens
hsa-mir-1304	chr11: 93741537(NR_146090)	chr11: 93744891-93745115(score=657)	Regulation	SRX471854	level 1	Prostate	H.sapiens
hsa-mir-1304	chr11: 93741537(NR_146090)	chr11: 93744892-93745054(score=479)	Regulation	SRX497605	level 1	Prostate	H.sapiens
hsa-mir-1304	chr11: 93741537(NR_146090)	chr11: 93744896-93745035(score=340)	Regulation	SRX502063	level 1	Prostate	H.sapiens
hsa-mir-1304	chr11: 93741537(NR_146090)	chr11: 93744897-93745123(score=508)	Regulation	SRX099183	level 1	Prostate	H.sapiens
hsa-mir-1304	chr11: 93741537(NR_146090)	chr11: 93744897-93745145(score=611)	Regulation	SRX059705	level 1	Prostate	H.sapiens
hsa-mir-1304	chr11: 93741537(NR_146090)	chr11: 93744900-93745133(score=485)	Regulation	SRX099182	level 1	Prostate	H.sapiens
hsa-mir-1304	chr11: 93741537(NR_146090)	chr11: 93744904-93745062(score=365)	Regulation	SRX502070	level 1	Prostate	H.sapiens
hsa-mir-1304	chr11: 93741537(NR_146090)	chr11: 93744904-93745094(score=529)	Regulation	SRX101132	level 1	Prostate	H.sapiens
hsa-mir-1304	chr11: 93741537(NR_146090)	chr11: 93744905-93745104(score=749)	Regulation	SRX101130	level 1	Prostate	H.sapiens
hsa-mir-1304	chr11: 93741537(NR_146090)	chr11: 93744912-93745123(score=594)	Regulation	SRX471208	level 1	Prostate	H.sapiens
hsa-mir-1304	chr11: 93741537(NR_146090)	chr11: 93744919-93745599(score=796)	Regulation	SRX595675	level 1	Prostate	H.sapiens
hsa-mir-1304	chr11: 93741537(NR_146090)	chr11: 93744921-93745094(score=316)	Regulation	SRX502059	level 1	Prostate	H.sapiens
hsa-mir-1304	chr11: 93741537(NR_146090)	chr11: 93744929-93745080(score=406)	Regulation	SRX502073	level 1	Prostate	H.sapiens
hsa-mir-1304	chr11: 93741537(NR_146090)	chr11: 93744936-93745061(score=440)	Regulation	SRX306507	level 1	Prostate	H.sapiens
hsa-mir-1304	chr11: 93741537(NR_146090)	chr11: 93745289-93745555(score=1000)	Regulation	SRX667983	level 1	Prostate	H.sapiens
hsa-mir-1304	chr11: 93741537(NR_146090)	chr11: 93745291-93745583(score=1000)	Regulation	SRX059704	level 1	Prostate	H.sapiens
hsa-mir-1304	chr11: 93741537(NR_146090)	chr11: 93745313-93745527(score=925)	Regulation	SRX173201	level 1	Prostate	H.sapiens
hsa-mir-1304	chr11: 93741537(NR_146090)	chr11: 93745313-93745536(score=1000)	Regulation	SRX1950171	level 1	Prostate	H.sapiens
hsa-mir-1304	chr11: 93741537(NR_146090)	chr11: 93745314-93745547(score=1000)	Regulation	SRX1950172	level 1	Prostate	H.sapiens
hsa-mir-1304	chr11: 93741537(NR_146090)	chr11: 93745316-93745513(score=464)	Regulation	SRX471852	level 1	Prostate	H.sapiens
hsa-mir-1304	chr11: 93741537(NR_146090)	chr11: 93745323-93745532(score=1000)	Regulation	SRX1950170	level 1	Prostate	H.sapiens
hsa-mir-1304	chr11: 93741537(NR_146090)	chr11: 93745325-93745536(score=1000)	Regulation	SRX1950173	level 1	Prostate	H.sapiens
hsa-mir-1304	chr11: 93741537(NR_146090)	chr11: 93745327-93745555(score=1000)	Regulation	SRX667982	level 1	Prostate	H.sapiens
hsa-mir-1304	chr11: 93741537(NR_146090)	chr11: 93745328-93745526(score=912)	Regulation	SRX497604	level 1	Prostate	H.sapiens
hsa-mir-1304	chr11: 93741537(NR_146090)	chr11: 93745330-93745559(score=421)	Regulation	SRX734410	level 1	Prostate	H.sapiens
hsa-mir-1304	chr11: 93741537(NR_146090)	chr11: 93745341-93745514(score=668)	Regulation	SRX497605	level 1	Prostate	H.sapiens
hsa-mir-1304	chr11: 93741537(NR_146090)	chr11: 93745349-93745534(score=513)	Regulation	SRX471849	level 1	Prostate	H.sapiens
hsa-mir-1304	chr11: 93741537(NR_146090)	chr11: 93745355-93745536(score=454)	Regulation	SRX471855	level 1	Prostate	H.sapiens
hsa-mir-1304	chr11: 93741537(NR_146090)	chr11: 93745357-93745543(score=564)	Regulation	SRX471851	level 1	Prostate	H.sapiens
hsa-mir-1304	chr11: 93741537(NR_146090)	chr11: 93745367-93745549(score=600)	Regulation	SRX383815	level 1	Prostate	H.sapiens
hsa-mir-1304	chr11: 93741537(NR_146090)	chr11: 93745377-93745523(score=550)	Regulation	SRX101130	level 1	Prostate	H.sapiens
hsa-mir-1304	chr11: 93741537(NR_146090)	chr11: 93745391-93745522(score=456)	Regulation	SRX101132	level 1	Prostate	H.sapiens
hsa-mir-1304	chr11: 93741537(NR_146090)	chr11: 93746205-93746407(score=1000)	Regulation	SRX173202	level 1	Prostate	H.sapiens
hsa-mir-1304	chr11: 93741537(NR_146090)	chr11: 93746255-93746379(score=647)	Regulation	SRX497604	level 1	Prostate	H.sapiens
hsa-mir-1304	chr11: 93741537(NR_146091)	chr11: 93744803-93745235(score=924)	Regulation	SRX667983	level 1	Prostate	H.sapiens
hsa-mir-1304	chr11: 93741537(NR_146091)	chr11: 93744804-93745188(score=1000)	Regulation	SRX667982	level 1	Prostate	H.sapiens
hsa-mir-1304	chr11: 93741537(NR_146091)	chr11: 93744805-93745171(score=814)	Regulation	SRX497604	level 1	Prostate	H.sapiens
hsa-mir-1304	chr11: 93741537(NR_146091)	chr11: 93744817-93745558(score=502)	Regulation	SRX595676	level 1	Prostate	H.sapiens
hsa-mir-1304	chr11: 93741537(NR_146091)	chr11: 93744821-93745591(score=798)	Regulation	SRX595671	level 1	Prostate	H.sapiens
hsa-mir-1304	chr11: 93741537(NR_146091)	chr11: 93744822-93745601(score=812)	Regulation	SRX1569767	level 1	Prostate	H.sapiens
hsa-mir-1304	chr11: 93741537(NR_146091)	chr11: 93744824-93745573(score=1000)	Regulation	SRX173202	level 1	Prostate	H.sapiens
hsa-mir-1304	chr11: 93741537(NR_146091)	chr11: 93744844-93745594(score=633)	Regulation	SRX1569768	level 1	Prostate	H.sapiens
hsa-mir-1304	chr11: 93741537(NR_146091)	chr11: 93744851-93745560(score=1000)	Regulation	SRX471850	level 1	Prostate	H.sapiens
hsa-mir-1304	chr11: 93741537(NR_146091)	chr11: 93744860-93745137(score=871)	Regulation	SRX1950170	level 1	Prostate	H.sapiens
hsa-mir-1304	chr11: 93741537(NR_146091)	chr11: 93744860-93745216(score=996)	Regulation	SRX1950172	level 1	Prostate	H.sapiens
hsa-mir-1304	chr11: 93741537(NR_146091)	chr11: 93744866-93745193(score=798)	Regulation	SRX1950173	level 1	Prostate	H.sapiens
hsa-mir-1304	chr11: 93741537(NR_146091)	chr11: 93744866-93745210(score=827)	Regulation	SRX173201	level 1	Prostate	H.sapiens
hsa-mir-1304	chr11: 93741537(NR_146091)	chr11: 93744868-93745169(score=1000)	Regulation	SRX059704	level 1	Prostate	H.sapiens
hsa-mir-1304	chr11: 93741537(NR_146091)	chr11: 93744870-93745133(score=950)	Regulation	SRX471849	level 1	Prostate	H.sapiens
hsa-mir-1304	chr11: 93741537(NR_146091)	chr11: 93744876-93745145(score=967)	Regulation	SRX1950171	level 1	Prostate	H.sapiens
hsa-mir-1304	chr11: 93741537(NR_146091)	chr11: 93744878-93745097(score=757)	Regulation	SRX471855	level 1	Prostate	H.sapiens
hsa-mir-1304	chr11: 93741537(NR_146091)	chr11: 93744880-93745249(score=665)	Regulation	SRX734410	level 1	Prostate	H.sapiens
hsa-mir-1304	chr11: 93741537(NR_146091)	chr11: 93744884-93745123(score=732)	Regulation	SRX471856	level 1	Prostate	H.sapiens
hsa-mir-1304	chr11: 93741537(NR_146091)	chr11: 93744884-93745132(score=577)	Regulation	SRX471852	level 1	Prostate	H.sapiens
hsa-mir-1304	chr11: 93741537(NR_146091)	chr11: 93744885-93745128(score=705)	Regulation	SRX471851	level 1	Prostate	H.sapiens
hsa-mir-1304	chr11: 93741537(NR_146091)	chr11: 93744885-93745556(score=669)	Regulation	SRX595677	level 1	Prostate	H.sapiens
hsa-mir-1304	chr11: 93741537(NR_146091)	chr11: 93744891-93745115(score=657)	Regulation	SRX471854	level 1	Prostate	H.sapiens
hsa-mir-1304	chr11: 93741537(NR_146091)	chr11: 93744892-93745054(score=479)	Regulation	SRX497605	level 1	Prostate	H.sapiens
hsa-mir-1304	chr11: 93741537(NR_146091)	chr11: 93744896-93745035(score=340)	Regulation	SRX502063	level 1	Prostate	H.sapiens
hsa-mir-1304	chr11: 93741537(NR_146091)	chr11: 93744897-93745123(score=508)	Regulation	SRX099183	level 1	Prostate	H.sapiens
hsa-mir-1304	chr11: 93741537(NR_146091)	chr11: 93744897-93745145(score=611)	Regulation	SRX059705	level 1	Prostate	H.sapiens
hsa-mir-1304	chr11: 93741537(NR_146091)	chr11: 93744900-93745133(score=485)	Regulation	SRX099182	level 1	Prostate	H.sapiens
hsa-mir-1304	chr11: 93741537(NR_146091)	chr11: 93744904-93745062(score=365)	Regulation	SRX502070	level 1	Prostate	H.sapiens
hsa-mir-1304	chr11: 93741537(NR_146091)	chr11: 93744904-93745094(score=529)	Regulation	SRX101132	level 1	Prostate	H.sapiens
hsa-mir-1304	chr11: 93741537(NR_146091)	chr11: 93744905-93745104(score=749)	Regulation	SRX101130	level 1	Prostate	H.sapiens
hsa-mir-1304	chr11: 93741537(NR_146091)	chr11: 93744912-93745123(score=594)	Regulation	SRX471208	level 1	Prostate	H.sapiens
hsa-mir-1304	chr11: 93741537(NR_146091)	chr11: 93744919-93745599(score=796)	Regulation	SRX595675	level 1	Prostate	H.sapiens
hsa-mir-1304	chr11: 93741537(NR_146091)	chr11: 93744921-93745094(score=316)	Regulation	SRX502059	level 1	Prostate	H.sapiens
hsa-mir-1304	chr11: 93741537(NR_146091)	chr11: 93744929-93745080(score=406)	Regulation	SRX502073	level 1	Prostate	H.sapiens
hsa-mir-1304	chr11: 93741537(NR_146091)	chr11: 93744936-93745061(score=440)	Regulation	SRX306507	level 1	Prostate	H.sapiens
hsa-mir-1304	chr11: 93741537(NR_146091)	chr11: 93745289-93745555(score=1000)	Regulation	SRX667983	level 1	Prostate	H.sapiens
hsa-mir-1304	chr11: 93741537(NR_146091)	chr11: 93745291-93745583(score=1000)	Regulation	SRX059704	level 1	Prostate	H.sapiens
hsa-mir-1304	chr11: 93741537(NR_146091)	chr11: 93745313-93745527(score=925)	Regulation	SRX173201	level 1	Prostate	H.sapiens
hsa-mir-1304	chr11: 93741537(NR_146091)	chr11: 93745313-93745536(score=1000)	Regulation	SRX1950171	level 1	Prostate	H.sapiens
hsa-mir-1304	chr11: 93741537(NR_146091)	chr11: 93745314-93745547(score=1000)	Regulation	SRX1950172	level 1	Prostate	H.sapiens
hsa-mir-1304	chr11: 93741537(NR_146091)	chr11: 93745316-93745513(score=464)	Regulation	SRX471852	level 1	Prostate	H.sapiens
hsa-mir-1304	chr11: 93741537(NR_146091)	chr11: 93745323-93745532(score=1000)	Regulation	SRX1950170	level 1	Prostate	H.sapiens
hsa-mir-1304	chr11: 93741537(NR_146091)	chr11: 93745325-93745536(score=1000)	Regulation	SRX1950173	level 1	Prostate	H.sapiens
hsa-mir-1304	chr11: 93741537(NR_146091)	chr11: 93745327-93745555(score=1000)	Regulation	SRX667982	level 1	Prostate	H.sapiens
hsa-mir-1304	chr11: 93741537(NR_146091)	chr11: 93745328-93745526(score=912)	Regulation	SRX497604	level 1	Prostate	H.sapiens
hsa-mir-1304	chr11: 93741537(NR_146091)	chr11: 93745330-93745559(score=421)	Regulation	SRX734410	level 1	Prostate	H.sapiens
hsa-mir-1304	chr11: 93741537(NR_146091)	chr11: 93745341-93745514(score=668)	Regulation	SRX497605	level 1	Prostate	H.sapiens
hsa-mir-1304	chr11: 93741537(NR_146091)	chr11: 93745349-93745534(score=513)	Regulation	SRX471849	level 1	Prostate	H.sapiens
hsa-mir-1304	chr11: 93741537(NR_146091)	chr11: 93745355-93745536(score=454)	Regulation	SRX471855	level 1	Prostate	H.sapiens
hsa-mir-1304	chr11: 93741537(NR_146091)	chr11: 93745357-93745543(score=564)	Regulation	SRX471851	level 1	Prostate	H.sapiens
hsa-mir-1304	chr11: 93741537(NR_146091)	chr11: 93745367-93745549(score=600)	Regulation	SRX383815	level 1	Prostate	H.sapiens
hsa-mir-1304	chr11: 93741537(NR_146091)	chr11: 93745377-93745523(score=550)	Regulation	SRX101130	level 1	Prostate	H.sapiens
hsa-mir-1304	chr11: 93741537(NR_146091)	chr11: 93745391-93745522(score=456)	Regulation	SRX101132	level 1	Prostate	H.sapiens
hsa-mir-1304	chr11: 93741537(NR_146091)	chr11: 93746205-93746407(score=1000)	Regulation	SRX173202	level 1	Prostate	H.sapiens
hsa-mir-1304	chr11: 93741537(NR_146091)	chr11: 93746255-93746379(score=647)	Regulation	SRX497604	level 1	Prostate	H.sapiens
hsa-mir-130a	chr11: 57641198	chr11: 57639940-57640108(score=690)	Regulation	SRX433201	level 1	Prostate	H.sapiens
hsa-mir-1322	chr8: 10839899(NM_001284356)	chr8: 10839760-10839943(score=339)	Regulation	SRX734410	level 1	Prostate	H.sapiens
hsa-mir-1322	chr8: 10839899(NM_001284356)	chr8: 10839767-10840020(score=564)	Regulation	SRX734411	level 1	Prostate	H.sapiens
hsa-mir-1322	chr8: 10839899(NM_017884)	chr8: 10839760-10839943(score=339)	Regulation	SRX734410	level 1	Prostate	H.sapiens
hsa-mir-1322	chr8: 10839899(NM_017884)	chr8: 10839767-10840020(score=564)	Regulation	SRX734411	level 1	Prostate	H.sapiens
hsa-mir-133a-1	chr18: 21831406(NR_110369)	chr18: 21833627-21833928(score=439)	Regulation	SRX1569768	level 1	Prostate	H.sapiens
hsa-mir-133a-1	chr18: 21831406(NR_110369)	chr18: 21833630-21834119(score=1000)	Regulation	SRX734410	level 1	Prostate	H.sapiens
hsa-mir-133a-1	chr18: 21831406(NR_110369)	chr18: 21833636-21833991(score=1000)	Regulation	SRX173202	level 1	Prostate	H.sapiens
hsa-mir-133a-1	chr18: 21831406(NR_110369)	chr18: 21833641-21834033(score=564)	Regulation	SRX595671	level 1	Prostate	H.sapiens
hsa-mir-133a-1	chr18: 21831406(NR_110369)	chr18: 21833642-21834031(score=548)	Regulation	SRX1569767	level 1	Prostate	H.sapiens
hsa-mir-133a-1	chr18: 21831406(NR_110369)	chr18: 21833643-21833933(score=761)	Regulation	SRX736065	level 1	Prostate	H.sapiens
hsa-mir-133a-1	chr18: 21831406(NR_110369)	chr18: 21833646-21833978(score=1000)	Regulation	SRX059704	level 1	Prostate	H.sapiens
hsa-mir-133a-1	chr18: 21831406(NR_110369)	chr18: 21833649-21833956(score=1000)	Regulation	SRX667982	level 1	Prostate	H.sapiens
hsa-mir-133a-1	chr18: 21831406(NR_110369)	chr18: 21833652-21833906(score=635)	Regulation	SRX2545040	level 1	Prostate	H.sapiens
hsa-mir-133a-1	chr18: 21831406(NR_110369)	chr18: 21833654-21833971(score=1000)	Regulation	SRX667983	level 1	Prostate	H.sapiens
hsa-mir-133a-1	chr18: 21831406(NR_110369)	chr18: 21833658-21833963(score=1000)	Regulation	SRX2017926	level 1	Prostate	H.sapiens
hsa-mir-133a-1	chr18: 21831406(NR_110369)	chr18: 21833667-21833925(score=1000)	Regulation	SRX1950171	level 1	Prostate	H.sapiens
hsa-mir-133a-1	chr18: 21831406(NR_110369)	chr18: 21833669-21833938(score=1000)	Regulation	SRX1950172	level 1	Prostate	H.sapiens
hsa-mir-133a-1	chr18: 21831406(NR_110369)	chr18: 21833669-21834069(score=447)	Regulation	SRX595677	level 1	Prostate	H.sapiens
hsa-mir-133a-1	chr18: 21831406(NR_110369)	chr18: 21833671-21833928(score=744)	Regulation	SRX847034	level 1	Prostate	H.sapiens
hsa-mir-133a-1	chr18: 21831406(NR_110369)	chr18: 21833671-21833947(score=1000)	Regulation	SRX847035	level 1	Prostate	H.sapiens
hsa-mir-133a-1	chr18: 21831406(NR_110369)	chr18: 21833674-21833914(score=1000)	Regulation	SRX173201	level 1	Prostate	H.sapiens
hsa-mir-133a-1	chr18: 21831406(NR_110369)	chr18: 21833674-21833925(score=1000)	Regulation	SRX1950173	level 1	Prostate	H.sapiens
hsa-mir-133a-1	chr18: 21831406(NR_110369)	chr18: 21833675-21833916(score=1000)	Regulation	SRX1950170	level 1	Prostate	H.sapiens
hsa-mir-133a-1	chr18: 21831406(NR_110369)	chr18: 21833675-21833956(score=1000)	Regulation	SRX471208	level 1	Prostate	H.sapiens
hsa-mir-133a-1	chr18: 21831406(NR_110369)	chr18: 21833678-21833951(score=1000)	Regulation	SRX101132	level 1	Prostate	H.sapiens
hsa-mir-133a-1	chr18: 21831406(NR_110369)	chr18: 21833679-21833933(score=1000)	Regulation	SRX497604	level 1	Prostate	H.sapiens
hsa-mir-133a-1	chr18: 21831406(NR_110369)	chr18: 21833679-21833955(score=1000)	Regulation	SRX101130	level 1	Prostate	H.sapiens
hsa-mir-133a-1	chr18: 21831406(NR_110369)	chr18: 21833681-21833947(score=793)	Regulation	SRX471850	level 1	Prostate	H.sapiens
hsa-mir-133a-1	chr18: 21831406(NR_110369)	chr18: 21833683-21833923(score=875)	Regulation	SRX1818073	level 1	Prostate	H.sapiens
hsa-mir-133a-1	chr18: 21831406(NR_110369)	chr18: 21833684-21833913(score=821)	Regulation	SRX059705	level 1	Prostate	H.sapiens
hsa-mir-133a-1	chr18: 21831406(NR_110369)	chr18: 21833686-21833927(score=1000)	Regulation	SRX383815	level 1	Prostate	H.sapiens
hsa-mir-133a-1	chr18: 21831406(NR_110369)	chr18: 21833692-21833992(score=649)	Regulation	SRX099183	level 1	Prostate	H.sapiens
hsa-mir-133a-1	chr18: 21831406(NR_110369)	chr18: 21833694-21833914(score=818)	Regulation	SRX471851	level 1	Prostate	H.sapiens
hsa-mir-133a-1	chr18: 21831406(NR_110369)	chr18: 21833696-21833951(score=1000)	Regulation	SRX734411	level 1	Prostate	H.sapiens
hsa-mir-133a-1	chr18: 21831406(NR_110369)	chr18: 21833697-21833879(score=437)	Regulation	SRX736054	level 1	Prostate	H.sapiens
hsa-mir-133a-1	chr18: 21831406(NR_110369)	chr18: 21833700-21833901(score=1000)	Regulation	SRX497605	level 1	Prostate	H.sapiens
hsa-mir-133a-1	chr18: 21831406(NR_110369)	chr18: 21833701-21833938(score=719)	Regulation	SRX471852	level 1	Prostate	H.sapiens
hsa-mir-133a-1	chr18: 21831406(NR_110369)	chr18: 21833702-21833893(score=465)	Regulation	SRX2545038	level 1	Prostate	H.sapiens
hsa-mir-133a-1	chr18: 21831406(NR_110369)	chr18: 21833703-21833892(score=699)	Regulation	SRX1033275	level 1	Prostate	H.sapiens
hsa-mir-133a-1	chr18: 21831406(NR_110369)	chr18: 21833705-21833928(score=723)	Regulation	SRX471849	level 1	Prostate	H.sapiens
hsa-mir-133a-1	chr18: 21831406(NR_110369)	chr18: 21833705-21833961(score=510)	Regulation	SRX099182	level 1	Prostate	H.sapiens
hsa-mir-133a-1	chr18: 21831406(NR_110369)	chr18: 21833706-21833900(score=610)	Regulation	SRX433198	level 1	Prostate	H.sapiens
hsa-mir-133a-1	chr18: 21831406(NR_110369)	chr18: 21833706-21833902(score=733)	Regulation	SRX1334494	level 1	Prostate	H.sapiens
hsa-mir-133a-1	chr18: 21831406(NR_110369)	chr18: 21833708-21833852(score=391)	Regulation	SRX736074	level 1	Prostate	H.sapiens
hsa-mir-133a-1	chr18: 21831406(NR_110369)	chr18: 21833708-21833931(score=651)	Regulation	SRX471855	level 1	Prostate	H.sapiens
hsa-mir-133a-1	chr18: 21831406(NR_110369)	chr18: 21833709-21833939(score=722)	Regulation	SRX734412	level 1	Prostate	H.sapiens
hsa-mir-133a-1	chr18: 21831406(NR_110369)	chr18: 21833711-21833932(score=958)	Regulation	SRX101135	level 1	Prostate	H.sapiens
hsa-mir-133a-1	chr18: 21831406(NR_110369)	chr18: 21833712-21833878(score=490)	Regulation	SRX173207	level 1	Prostate	H.sapiens
hsa-mir-133a-1	chr18: 21831406(NR_110369)	chr18: 21833713-21833884(score=682)	Regulation	SRX736066	level 1	Prostate	H.sapiens
hsa-mir-133a-1	chr18: 21831406(NR_110369)	chr18: 21833713-21833910(score=749)	Regulation	SRX1818077	level 1	Prostate	H.sapiens
hsa-mir-133a-1	chr18: 21831406(NR_110369)	chr18: 21833713-21833910(score=795)	Regulation	SRX1818075	level 1	Prostate	H.sapiens
[truncated: 11,113 more rows]

## Sheet: Sheet2
TF name:STAT3
miRNA name	TSS	Binding site	Action type	SRAID/PMID	Evidence	Tissue	Species
hsa-mir-10396a	chr21: 8986999	chr21: 8987068-8987469(score=449)	Regulation	SRX3124566	level 1	Prostate	H.sapiens
hsa-mir-10398	chr6: 41733610	chr6: 41734410-41734645(score=339)	Regulation	SRX3124566	level 1	Prostate	H.sapiens
hsa-mir-10398	chr6: 41734401(NM_001271945)	chr6: 41734410-41734645(score=339)	Regulation	SRX3124566	level 1	Prostate	H.sapiens
hsa-mir-10398	chr6: 41735060(NM_007162)	chr6: 41734410-41734645(score=339)	Regulation	SRX3124566	level 1	Prostate	H.sapiens
hsa-mir-1178	chr12: 119713724	chr12: 119716546-119716792(score=406)	Regulation	SRX3124566	level 1	Prostate	H.sapiens
hsa-mir-1182	chr1: 231040230	chr1: 231040176-231040362(score=440)	Regulation	SRX3124566	level 2	Prostate	H.sapiens
hsa-mir-12115	chr4: 22515312	chr4: 22514063-22514303(score=592)	Regulation	SRX3124566	level 1	Prostate	H.sapiens
hsa-mir-12118	chr5: 173303730	chr5: 173303991-173304220(score=1000)	Regulation	SRX3124566	level 1	Prostate	H.sapiens
hsa-mir-12136	chr1: 632685	chr1: 631904-632068(score=332)	Regulation	SRX3124566	level 1	Prostate	H.sapiens
hsa-mir-1234	chr8: 144409349(NM_013291)	chr8: 144412974-144413136(score=463)	Regulation(feedback)	SRX3124566	level 1	Prostate	H.sapiens
hsa-mir-1244-1	chr2: 231708525(NM_001099285)	chr2: 231708040-231708260(score=999)	Regulation	SRX3124566	level 1	Prostate	H.sapiens
hsa-mir-1244-1	chr2: 231708525(NM_002823)	chr2: 231708040-231708260(score=999)	Regulation	SRX3124566	level 1	Prostate	H.sapiens
hsa-mir-135b	chr1: 205449966	chr1: 205449909-205450094(score=374)	Regulation	SRX3124566	level 2	Prostate	H.sapiens
hsa-mir-203a	chr14: 104117122	chr14: 104116955-104117130(score=530)	Regulation	SRX3124566	level 2	Prostate	H.sapiens
hsa-mir-203b	chr14: 104117503	chr14: 104116955-104117130(score=530)	Regulation	SRX3124566	level 1	Prostate	H.sapiens
hsa-mir-21	chr17: 59837931	chr17: 59837776-59837948(score=316)	Regulation(feedback)	SRX3124566	level 2	Prostate	H.sapiens
hsa-mir-2277	chr5: 93620788	chr5: 93621521-93621681(score=400)	Regulation	SRX3124566	level 1	Prostate	H.sapiens
hsa-mir-3064	chr17: 64506289	chr17: 64506205-64506395(score=483)	Regulation	SRX3124566	level 2	Prostate	H.sapiens
hsa-mir-3150a	chr8: 95024975(NR_148913)	chr8: 95024696-95024934(score=847)	Regulation	SRX3124566	level 1	Prostate	H.sapiens
hsa-mir-3150a	chr8: 95024975(NR_148914)	chr8: 95024696-95024934(score=847)	Regulation	SRX3124566	level 1	Prostate	H.sapiens
hsa-mir-3150a	chr8: 95024975(NR_148915)	chr8: 95024696-95024934(score=847)	Regulation	SRX3124566	level 1	Prostate	H.sapiens
hsa-mir-3170	chr13: 98142562(NM_001286839)	chr13: 98143023-98143205(score=462)	Regulation	SRX3124566	level 1	Prostate	H.sapiens
hsa-mir-3170	chr13: 98143098(NM_001001715)	chr13: 98143023-98143205(score=462)	Regulation	SRX3124566	level 1	Prostate	H.sapiens
hsa-mir-3170	chr13: 98143098(NM_005766)	chr13: 98143023-98143205(score=462)	Regulation	SRX3124566	level 1	Prostate	H.sapiens
hsa-mir-3614	chr17: 56914048(NM_005082)	chr17: 56915780-56916001(score=642)	Regulation	SRX3124566	level 1	Prostate	H.sapiens
hsa-mir-3648-2	chr21: 8986999	chr21: 8987068-8987469(score=449)	Regulation	SRX3124566	level 1	Prostate	H.sapiens
hsa-mir-378h	chr5: 154829458	chr5: 154829888-154830118(score=517)	Regulation	SRX3124566	level 1	Prostate	H.sapiens
hsa-mir-4258	chr1: 154974642(NM_001826)	chr1: 154972683-154972877(score=612)	Regulation	SRX3124566	level 1	Prostate	H.sapiens
hsa-mir-4258	chr1: 154974642(NR_024163)	chr1: 154972683-154972877(score=612)	Regulation	SRX3124566	level 1	Prostate	H.sapiens
hsa-mir-4258	chr1: 154975693	chr1: 154972683-154972877(score=612)	Regulation	SRX3124566	level 1	Prostate	H.sapiens
hsa-mir-4470	chr8: 61714749	chr8: 61714557-61714733(score=469)	Regulation	SRX3124566	level 2	Prostate	H.sapiens
hsa-mir-4485	chr11: 10508326	chr11: 10509227-10509763(score=835)	Regulation	SRX3124566	level 1	Prostate	H.sapiens
hsa-mir-4485	chr11: 10509176(NM_001190702)	chr11: 10509227-10509763(score=835)	Regulation	SRX3124566	level 1	Prostate	H.sapiens
hsa-mir-4496	chr12: 108635810	chr12: 108634594-108634767(score=446)	Regulation	SRX3124566	level 1	Prostate	H.sapiens
hsa-mir-4506	chr14: 93957421(NM_016150)	chr14: 93959479-93959725(score=798)	Regulation	SRX3124566	level 1	Prostate	H.sapiens
hsa-mir-4515	chr15: 83067335	chr15: 83067111-83067335(score=466)	Regulation	SRX3124566	level 1	Prostate	H.sapiens
hsa-mir-4636	chr5: 9546121(NM_003966)	chr5: 9546248-9546427(score=458)	Regulation	SRX3124566	level 1	Prostate	H.sapiens
hsa-mir-4648	chr7: 2527074	chr7: 2524214-2524387(score=371)	Regulation	SRX3124566	level 1	Prostate	H.sapiens
hsa-mir-4663	chr8: 123215863	chr8: 123217204-123217397(score=369)	Regulation	SRX3124566	level 1	Prostate	H.sapiens
hsa-mir-4758	chr20: 62367312(NM_005560)	chr20: 62369104-62369262(score=411)	Regulation	SRX3124566	level 1	Prostate	H.sapiens
hsa-mir-4802	chr4: 40629866(NM_001098634)	chr4: 40629892-40630106(score=660)	Regulation	SRX3124566	level 1	Prostate	H.sapiens
hsa-mir-5000	chr2: 74958643	chr2: 74958381-74958643(score=756)	Regulation	SRX3124566	level 2	Prostate	H.sapiens
hsa-mir-5047	chr17: 64506289	chr17: 64506205-64506395(score=483)	Regulation	SRX3124566	level 2	Prostate	H.sapiens
hsa-mir-5197	chr5: 143679860	chr5: 143679877-143680087(score=776)	Regulation	SRX3124566	level 1	Prostate	H.sapiens
hsa-mir-582	chr5: 59768612(NM_001197218)	chr5: 59769955-59770122(score=584)	Regulation	SRX3124566	level 1	Prostate	H.sapiens
hsa-mir-612	chr11: 65422798(NR_131012)	chr11: 65421262-65421492(score=1000)	Regulation	SRX3124566	level 1	Prostate	H.sapiens
hsa-mir-614	chr12: 12891565	chr12: 12891373-12891552(score=475)	Regulation	SRX3124566	level 2	Prostate	H.sapiens
hsa-mir-619	chr12: 108837006	chr12: 108838429-108838613(score=456)	Regulation	SRX3124566	level 1	Prostate	H.sapiens
hsa-mir-629	chr15: 70097917(NM_001105192)	chr15: 70101607-70101770(score=414)	Regulation	SRX3124566	level 1	Prostate	H.sapiens
hsa-mir-629	chr15: 70097917(NM_001282979)	chr15: 70101607-70101770(score=414)	Regulation	SRX3124566	level 1	Prostate	H.sapiens
hsa-mir-629	chr15: 70097917(NM_001282980)	chr15: 70101607-70101770(score=414)	Regulation	SRX3124566	level 1	Prostate	H.sapiens
hsa-mir-629	chr15: 70097917(NM_005078)	chr15: 70101607-70101770(score=414)	Regulation	SRX3124566	level 1	Prostate	H.sapiens
hsa-mir-629	chr15: 70097917(NM_020908)	chr15: 70101607-70101770(score=414)	Regulation	SRX3124566	level 1	Prostate	H.sapiens
hsa-mir-6499	chr5: 151568944(NM_001447)	chr5: 151572779-151572954(score=502)	Regulation	SRX3124566	level 1	Prostate	H.sapiens
hsa-mir-6737	chr1: 153962420	chr1: 153963418-153963638(score=640)	Regulation	SRX3124566	level 1	Prostate	H.sapiens
hsa-mir-6737	chr1: 153963368(NM_001271957)	chr1: 153963418-153963638(score=640)	Regulation	SRX3124566	level 1	Prostate	H.sapiens
hsa-mir-6737	chr1: 153963492(NM_001271959)	chr1: 153963418-153963638(score=640)	Regulation	SRX3124566	level 1	Prostate	H.sapiens
hsa-mir-6737	chr1: 153963641(NM_001271958)	chr1: 153963418-153963638(score=640)	Regulation	SRX3124566	level 1	Prostate	H.sapiens
hsa-mir-6737	chr1: 153963641(NM_001271961)	chr1: 153963418-153963638(score=640)	Regulation	SRX3124566	level 1	Prostate	H.sapiens
hsa-mir-6762	chr12: 113244261(NM_001301214)	chr12: 113242123-113242324(score=467)	Regulation	SRX3124566	level 1	Prostate	H.sapiens
hsa-mir-6762	chr12: 113244368(NM_001351347)	chr12: 113242123-113242324(score=467)	Regulation	SRX3124566	level 1	Prostate	H.sapiens
hsa-mir-6773	chr16: 68233499	chr16: 68234206-68234541(score=922)	Regulation	SRX3124566	level 1	Prostate	H.sapiens
hsa-mir-6799	chr19: 49766923(NM_014203)	chr19: 49765556-49765816(score=453)	Regulation	SRX3124566	level 1	Prostate	H.sapiens
hsa-mir-6799	chr19: 49766923(NM_130787)	chr19: 49765556-49765816(score=453)	Regulation	SRX3124566	level 1	Prostate	H.sapiens
hsa-mir-6842	chr8: 27311482(NM_173174)	chr8: 27311329-27311495(score=339)	Regulation	SRX3124566	level 1	Prostate	H.sapiens
hsa-mir-6849	chr8: 144409349(NM_013291)	chr8: 144412974-144413136(score=463)	Regulation	SRX3124566	level 1	Prostate	H.sapiens
hsa-mir-761	chr1: 51878727	chr1: 51878706-51879000(score=671)	Regulation	SRX3124566	level 2	Prostate	H.sapiens
hsa-mir-8085	chr19: 44748708	chr19: 44748499-44748676(score=473)	Regulation	SRX3124566	level 2	Prostate	H.sapiens
hsa-mir-8085	chr19: 44748721(NM_005178)	chr19: 44747425-44747625(score=394)	Regulation	SRX3124566	level 1	Prostate	H.sapiens
hsa-mir-8085	chr19: 44758657	chr19: 44754286-44754692(score=1000)	Regulation	SRX3124566	level 1	Prostate	H.sapiens
hsa-mir-92b	chr1: 155195177	chr1: 155193205-155193661(score=1000)	Regulation	SRX3124566	level 1	Prostate	H.sapiens
hsa-mir-939	chr8: 144409349(NM_013291)	chr8: 144412974-144413136(score=463)	Regulation	SRX3124566	level 1	Prostate	H.sapiens

## Sheet: Sheet3
TF name:RELA
miRNA name	TSS	Binding site	Action type	SRAID/PMID	Evidence	Tissue	Species
hsa-let-7i	chr12: 62603686	chr12: 62602893-62603091(score=378)	Regulation	SRX1885172	level 1	Prostate	H.sapiens
hsa-let-7i	chr12: 62603686	chr12: 62602919-62603066(score=465)	Regulation	SRX1885199	level 1	Prostate	H.sapiens
hsa-let-7i	chr12: 62603686	chr12: 62602923-62603084(score=384)	Regulation	SRX1885171	level 1	Prostate	H.sapiens
hsa-let-7i	chr12: 62603686	chr12: 62602927-62603109(score=629)	Regulation	SRX1885200	level 1	Prostate	H.sapiens
hsa-let-7i	chr12: 62603686	chr12: 62602928-62603069(score=653)	Regulation	SRX1885170	level 1	Prostate	H.sapiens
hsa-let-7i	chr12: 62603686	chr12: 62602962-62603078(score=468)	Regulation	SRX1885169	level 1	Prostate	H.sapiens
hsa-mir-10393	chr15: 44711487(NM_004048)	chr15: 44711320-44711492(score=444)	Regulation	SRX1885172	level 1	Prostate	H.sapiens
hsa-mir-10393	chr15: 44711487(NM_004048)	chr15: 44711333-44711506(score=529)	Regulation	SRX1885171	level 1	Prostate	H.sapiens
hsa-mir-10396a	chr21: 8986999	chr21: 8986930-8987577(score=693)	Regulation	SRX1885200	level 1	Prostate	H.sapiens
hsa-mir-10396a	chr21: 8986999	chr21: 8986989-8987125(score=403)	Regulation	SRX1885206	level 1	Prostate	H.sapiens
hsa-mir-10396a	chr21: 8986999	chr21: 8986994-8987124(score=305)	Regulation	SRX1885202	level 1	Prostate	H.sapiens
hsa-mir-10396a	chr21: 8986999	chr21: 8987003-8987059(score=350)	Regulation	SRX1885204	level 1	Prostate	H.sapiens
hsa-mir-10396a	chr21: 8986999	chr21: 8987009-8987208(score=306)	Regulation	SRX1885172	level 1	Prostate	H.sapiens
hsa-mir-10396a	chr21: 8986999	chr21: 8987110-8987451(score=404)	Regulation	SRX1885171	level 1	Prostate	H.sapiens
hsa-mir-10396a	chr21: 8986999	chr21: 8987295-8987446(score=378)	Regulation	SRX1885172	level 1	Prostate	H.sapiens
hsa-mir-10396a	chr21: 8986999	chr21: 8987316-8987432(score=419)	Regulation	SRX1885206	level 1	Prostate	H.sapiens
hsa-mir-10396a	chr21: 8986999	chr21: 8987371-8987437(score=463)	Regulation	SRX1885202	level 1	Prostate	H.sapiens
hsa-mir-10396a	chr21: 8986999	chr21: 8987372-8987426(score=422)	Regulation	SRX1885204	level 1	Prostate	H.sapiens
hsa-mir-11181	chr15: 88256731(NM_001012338)	chr15: 88258478-88258618(score=417)	Regulation	SRX1885199	level 1	Prostate	H.sapiens
hsa-mir-11181	chr15: 88256731(NM_001012338)	chr15: 88258479-88258643(score=482)	Regulation	SRX1885170	level 1	Prostate	H.sapiens
hsa-mir-11181	chr15: 88256731(NM_001012338)	chr15: 88258495-88258643(score=442)	Regulation	SRX1885169	level 1	Prostate	H.sapiens
hsa-mir-11181	chr15: 88256731(NM_001012338)	chr15: 88258513-88258635(score=449)	Regulation	SRX1885200	level 1	Prostate	H.sapiens
hsa-mir-11181	chr15: 88256731(NM_001243101)	chr15: 88258478-88258618(score=417)	Regulation	SRX1885199	level 1	Prostate	H.sapiens
hsa-mir-11181	chr15: 88256731(NM_001243101)	chr15: 88258479-88258643(score=482)	Regulation	SRX1885170	level 1	Prostate	H.sapiens
hsa-mir-11181	chr15: 88256731(NM_001243101)	chr15: 88258495-88258643(score=442)	Regulation	SRX1885169	level 1	Prostate	H.sapiens
hsa-mir-11181	chr15: 88256731(NM_001243101)	chr15: 88258513-88258635(score=449)	Regulation	SRX1885200	level 1	Prostate	H.sapiens
hsa-mir-11181	chr15: 88256731(NM_002530)	chr15: 88258478-88258618(score=417)	Regulation	SRX1885199	level 1	Prostate	H.sapiens
hsa-mir-11181	chr15: 88256731(NM_002530)	chr15: 88258479-88258643(score=482)	Regulation	SRX1885170	level 1	Prostate	H.sapiens
hsa-mir-11181	chr15: 88256731(NM_002530)	chr15: 88258495-88258643(score=442)	Regulation	SRX1885169	level 1	Prostate	H.sapiens
hsa-mir-11181	chr15: 88256731(NM_002530)	chr15: 88258513-88258635(score=449)	Regulation	SRX1885200	level 1	Prostate	H.sapiens
hsa-mir-12136	chr1: 632685	chr1: 631923-632054(score=409)	Regulation	SRX1885170	level 1	Prostate	H.sapiens
hsa-mir-12136	chr1: 632685	chr1: 632142-632280(score=443)	Regulation	SRX1885199	level 1	Prostate	H.sapiens
hsa-mir-12136	chr1: 632685	chr1: 632152-632260(score=491)	Regulation	SRX1885170	level 1	Prostate	H.sapiens
hsa-mir-12136	chr1: 632685	chr1: 632157-632252(score=463)	Regulation	SRX1885169	level 1	Prostate	H.sapiens
hsa-mir-12136	chr1: 632685	chr1: 632159-632211(score=256)	Regulation	SRX1885205	level 1	Prostate	H.sapiens
hsa-mir-12136	chr1: 632685	chr1: 632161-632219(score=237)	Regulation	SRX1885202	level 1	Prostate	H.sapiens
hsa-mir-12136	chr1: 632685	chr1: 632167-632224(score=255)	Regulation	SRX1885206	level 1	Prostate	H.sapiens
hsa-mir-12136	chr1: 632685	chr1: 632170-632225(score=274)	Regulation	SRX1885203	level 1	Prostate	H.sapiens
hsa-mir-1282	chr15: 43798835	chr15: 43798776-43798978(score=1000)	Regulation	SRX1885200	level 2	Prostate	H.sapiens
hsa-mir-1282	chr15: 43798835	chr15: 43798785-43798992(score=958)	Regulation	SRX1885199	level 2	Prostate	H.sapiens
hsa-mir-1282	chr15: 43798835	chr15: 43798787-43798963(score=865)	Regulation	SRX1885171	level 2	Prostate	H.sapiens
hsa-mir-1282	chr15: 43798835	chr15: 43798791-43798971(score=718)	Regulation	SRX1885172	level 2	Prostate	H.sapiens
hsa-mir-1282	chr15: 43798835	chr15: 43798813-43798916(score=344)	Regulation	SRX1885170	level 2	Prostate	H.sapiens
hsa-mir-1302-4	chr2: 207529597	chr2: 207529520-207529723(score=1000)	Regulation	SRX1885200	level 2	Prostate	H.sapiens
hsa-mir-1302-4	chr2: 207529597	chr2: 207529533-207529729(score=981)	Regulation	SRX1885199	level 2	Prostate	H.sapiens
hsa-mir-1302-4	chr2: 207529597	chr2: 207529540-207529715(score=634)	Regulation	SRX1885171	level 2	Prostate	H.sapiens
hsa-mir-1302-4	chr2: 207529597	chr2: 207529547-207529740(score=1000)	Regulation	SRX1885170	level 2	Prostate	H.sapiens
hsa-mir-1302-4	chr2: 207529597	chr2: 207529550-207529709(score=957)	Regulation	SRX1885169	level 2	Prostate	H.sapiens
hsa-mir-1302-4	chr2: 207529597	chr2: 207529555-207529733(score=665)	Regulation	SRX1885172	level 2	Prostate	H.sapiens
hsa-mir-1538	chr16: 69565868	chr16: 69567177-69567332(score=588)	Regulation	SRX1885199	level 1	Prostate	H.sapiens
hsa-mir-1538	chr16: 69565868	chr16: 69567196-69567331(score=465)	Regulation	SRX1885200	level 1	Prostate	H.sapiens
hsa-mir-1538	chr16: 69565868	chr16: 69567200-69567341(score=605)	Regulation	SRX1885170	level 1	Prostate	H.sapiens
hsa-mir-1538	chr16: 69565868	chr16: 69567212-69567344(score=441)	Regulation	SRX1885171	level 1	Prostate	H.sapiens
hsa-mir-1538	chr16: 69565868	chr16: 69567219-69567342(score=392)	Regulation	SRX1885169	level 1	Prostate	H.sapiens
hsa-mir-1538	chr16: 69565868	chr16: 69567224-69567341(score=418)	Regulation	SRX1885172	level 1	Prostate	H.sapiens
hsa-mir-3146	chr7: 19709026	chr7: 19709004-19709181(score=449)	Regulation	SRX1885171	level 2	Prostate	H.sapiens
hsa-mir-3146	chr7: 19709026	chr7: 19709050-19709168(score=342)	Regulation	SRX1885172	level 2	Prostate	H.sapiens
hsa-mir-3175	chr15: 92904399	chr15: 92904460-92904576(score=503)	Regulation	SRX1885170	level 1	Prostate	H.sapiens
hsa-mir-3181	chr16: 50742086	chr16: 50741798-50742140(score=1000)	Regulation	SRX1885171	level 2	Prostate	H.sapiens
hsa-mir-3181	chr16: 50742086	chr16: 50741839-50742111(score=556)	Regulation	SRX1885170	level 2	Prostate	H.sapiens
hsa-mir-3181	chr16: 50742086	chr16: 50741846-50742141(score=585)	Regulation	SRX1885200	level 2	Prostate	H.sapiens
hsa-mir-3181	chr16: 50742086	chr16: 50741852-50742098(score=365)	Regulation	SRX1885199	level 2	Prostate	H.sapiens
hsa-mir-3181	chr16: 50742086	chr16: 50741896-50742103(score=318)	Regulation	SRX1885169	level 2	Prostate	H.sapiens
hsa-mir-3181	chr16: 50742050(NM_001042355)	chr16: 50741784-50742140(score=864)	Regulation	SRX1885172	level 1	Prostate	H.sapiens
hsa-mir-3181	chr16: 50742050(NM_015247)	chr16: 50741784-50742140(score=864)	Regulation	SRX1885172	level 1	Prostate	H.sapiens
hsa-mir-3181	chr16: 50742118(NM_001042412)	chr16: 50741784-50742140(score=864)	Regulation	SRX1885172	level 1	Prostate	H.sapiens
hsa-mir-3181	chr16: 50742305	chr16: 50741784-50742140(score=864)	Regulation	SRX1885172	level 1	Prostate	H.sapiens
hsa-mir-3614	chr17: 56914048(NM_005082)	chr17: 56915758-56915873(score=413)	Regulation	SRX1885200	level 1	Prostate	H.sapiens
hsa-mir-3614	chr17: 56914048(NM_005082)	chr17: 56915768-56915892(score=440)	Regulation	SRX1885199	level 1	Prostate	H.sapiens
hsa-mir-3614	chr17: 56914048(NM_005082)	chr17: 56915770-56915901(score=537)	Regulation	SRX1885170	level 1	Prostate	H.sapiens
hsa-mir-3614	chr17: 56914048(NM_005082)	chr17: 56915774-56915909(score=503)	Regulation	SRX1885169	level 1	Prostate	H.sapiens
hsa-mir-3648-2	chr21: 8986999	chr21: 8986930-8987577(score=693)	Regulation	SRX1885200	level 1	Prostate	H.sapiens
hsa-mir-3648-2	chr21: 8986999	chr21: 8986989-8987125(score=403)	Regulation	SRX1885206	level 1	Prostate	H.sapiens
hsa-mir-3648-2	chr21: 8986999	chr21: 8986994-8987124(score=305)	Regulation	SRX1885202	level 1	Prostate	H.sapiens
hsa-mir-3648-2	chr21: 8986999	chr21: 8987003-8987059(score=350)	Regulation	SRX1885204	level 1	Prostate	H.sapiens
hsa-mir-3648-2	chr21: 8986999	chr21: 8987009-8987208(score=306)	Regulation	SRX1885172	level 1	Prostate	H.sapiens
hsa-mir-3648-2	chr21: 8986999	chr21: 8987110-8987451(score=404)	Regulation	SRX1885171	level 1	Prostate	H.sapiens
hsa-mir-3648-2	chr21: 8986999	chr21: 8987295-8987446(score=378)	Regulation	SRX1885172	level 1	Prostate	H.sapiens
hsa-mir-3648-2	chr21: 8986999	chr21: 8987316-8987432(score=419)	Regulation	SRX1885206	level 1	Prostate	H.sapiens
hsa-mir-3648-2	chr21: 8986999	chr21: 8987371-8987437(score=463)	Regulation	SRX1885202	level 1	Prostate	H.sapiens
hsa-mir-3648-2	chr21: 8986999	chr21: 8987372-8987426(score=422)	Regulation	SRX1885204	level 1	Prostate	H.sapiens
hsa-mir-3935	chr16: 56245520	chr16: 56246209-56246438(score=1000)	Regulation	SRX1885170	level 1	Prostate	H.sapiens
hsa-mir-3935	chr16: 56245520	chr16: 56246215-56246420(score=1000)	Regulation	SRX1885169	level 1	Prostate	H.sapiens
hsa-mir-3935	chr16: 56245520	chr16: 56246240-56246368(score=506)	Regulation	SRX1885172	level 1	Prostate	H.sapiens
hsa-mir-3935	chr16: 56245520	chr16: 56246247-56246364(score=406)	Regulation	SRX1885200	level 1	Prostate	H.sapiens
hsa-mir-4252	chr1: 6429896	chr1: 6431248-6431355(score=353)	Regulation	SRX1885170	level 1	Prostate	H.sapiens
hsa-mir-4485	chr11: 10509186	chr11: 10509210-10509397(score=458)	Regulation	SRX1885170	level 2	Prostate	H.sapiens
hsa-mir-4485	chr11: 10509186	chr11: 10509217-10509335(score=442)	Regulation	SRX1885199	level 2	Prostate	H.sapiens
hsa-mir-4485	chr11: 10509186	chr11: 10509227-10509281(score=702)	Regulation	SRX1885202	level 2	Prostate	H.sapiens
hsa-mir-4485	chr11: 10509186	chr11: 10509228-10509279(score=614)	Regulation	SRX1885203	level 2	Prostate	H.sapiens
hsa-mir-4485	chr11: 10508326	chr11: 10509444-10509719(score=464)	Regulation	SRX1885200	level 1	Prostate	H.sapiens
hsa-mir-4485	chr11: 10508326	chr11: 10509501-10509731(score=824)	Regulation	SRX1885170	level 1	Prostate	H.sapiens
hsa-mir-4485	chr11: 10508326	chr11: 10509526-10509726(score=542)	Regulation	SRX1885199	level 1	Prostate	H.sapiens
hsa-mir-4485	chr11: 10508326	chr11: 10509576-10509723(score=413)	Regulation	SRX1885171	level 1	Prostate	H.sapiens
hsa-mir-4485	chr11: 10508326	chr11: 10509615-10509704(score=636)	Regulation	SRX1885202	level 1	Prostate	H.sapiens
hsa-mir-4485	chr11: 10508326	chr11: 10509616-10509700(score=480)	Regulation	SRX1885203	level 1	Prostate	H.sapiens
hsa-mir-4485	chr11: 10508326	chr11: 10509617-10509708(score=661)	Regulation	SRX1885206	level 1	Prostate	H.sapiens
hsa-mir-4485	chr11: 10508326	chr11: 10509619-10509681(score=499)	Regulation	SRX1885204	level 1	Prostate	H.sapiens
hsa-mir-4485	chr11: 10508326	chr11: 10509620-10509702(score=479)	Regulation	SRX1885201	level 1	Prostate	H.sapiens
hsa-mir-4485	chr11: 10508326	chr11: 10509623-10509696(score=397)	Regulation	SRX1885205	level 1	Prostate	H.sapiens
hsa-mir-4485	chr11: 10509176(NM_001190702)	chr11: 10509444-10509719(score=464)	Regulation	SRX1885200	level 1	Prostate	H.sapiens
hsa-mir-4485	chr11: 10509176(NM_001190702)	chr11: 10509501-10509731(score=824)	Regulation	SRX1885170	level 1	Prostate	H.sapiens
hsa-mir-4485	chr11: 10509176(NM_001190702)	chr11: 10509526-10509726(score=542)	Regulation	SRX1885199	level 1	Prostate	H.sapiens
hsa-mir-4485	chr11: 10509176(NM_001190702)	chr11: 10509576-10509723(score=413)	Regulation	SRX1885171	level 1	Prostate	H.sapiens
hsa-mir-4485	chr11: 10509176(NM_001190702)	chr11: 10509615-10509704(score=636)	Regulation	SRX1885202	level 1	Prostate	H.sapiens
hsa-mir-4485	chr11: 10509176(NM_001190702)	chr11: 10509616-10509700(score=480)	Regulation	SRX1885203	level 1	Prostate	H.sapiens
hsa-mir-4485	chr11: 10509176(NM_001190702)	chr11: 10509617-10509708(score=661)	Regulation	SRX1885206	level 1	Prostate	H.sapiens
hsa-mir-4485	chr11: 10509176(NM_001190702)	chr11: 10509619-10509681(score=499)	Regulation	SRX1885204	level 1	Prostate	H.sapiens
hsa-mir-4485	chr11: 10509176(NM_001190702)	chr11: 10509620-10509702(score=479)	Regulation	SRX1885201	level 1	Prostate	H.sapiens
hsa-mir-4485	chr11: 10509176(NM_001190702)	chr11: 10509623-10509696(score=397)	Regulation	SRX1885205	level 1	Prostate	H.sapiens
hsa-mir-4506	chr14: 93959413	chr14: 93959451-93959598(score=845)	Regulation	SRX1885170	level 2	Prostate	H.sapiens
hsa-mir-4506	chr14: 93959413	chr14: 93959457-93959599(score=537)	Regulation	SRX1885169	level 2	Prostate	H.sapiens
hsa-mir-4506	chr14: 93959413	chr14: 93959472-93959604(score=413)	Regulation	SRX1885199	level 2	Prostate	H.sapiens
hsa-mir-4506	chr14: 93959413	chr14: 93959473-93959589(score=439)	Regulation	SRX1885200	level 2	Prostate	H.sapiens
hsa-mir-4637	chr5: 14826012	chr5: 14825016-14825196(score=572)	Regulation	SRX1885200	level 1	Prostate	H.sapiens
hsa-mir-4640	chr6: 30882613(NM_001297652)	chr6: 30882729-30882899(score=747)	Regulation	SRX1885171	level 1	Prostate	H.sapiens
hsa-mir-4640	chr6: 30882613(NM_001297652)	chr6: 30882733-30882893(score=828)	Regulation	SRX1885172	level 1	Prostate	H.sapiens
hsa-mir-4640	chr6: 30882613(NM_001297652)	chr6: 30882753-30882897(score=642)	Regulation	SRX1885200	level 1	Prostate	H.sapiens
hsa-mir-4640	chr6: 30882613(NM_001297652)	chr6: 30882756-30882878(score=370)	Regulation	SRX1885199	level 1	Prostate	H.sapiens
hsa-mir-4640	chr6: 30882613(NM_001297652)	chr6: 30882773-30882878(score=391)	Regulation	SRX1885169	level 1	Prostate	H.sapiens
hsa-mir-4640	chr6: 30882613(NM_001297652)	chr6: 30882773-30882896(score=554)	Regulation	SRX1885170	level 1	Prostate	H.sapiens
hsa-mir-4640	chr6: 30884084(NM_001954)	chr6: 30882729-30882899(score=747)	Regulation	SRX1885171	level 1	Prostate	H.sapiens
hsa-mir-4640	chr6: 30884084(NM_001954)	chr6: 30882733-30882893(score=828)	Regulation	SRX1885172	level 1	Prostate	H.sapiens
hsa-mir-4640	chr6: 30884084(NM_001954)	chr6: 30882753-30882897(score=642)	Regulation	SRX1885200	level 1	Prostate	H.sapiens
hsa-mir-4640	chr6: 30884084(NM_001954)	chr6: 30882756-30882878(score=370)	Regulation	SRX1885199	level 1	Prostate	H.sapiens
hsa-mir-4640	chr6: 30884084(NM_001954)	chr6: 30882773-30882878(score=391)	Regulation	SRX1885169	level 1	Prostate	H.sapiens
hsa-mir-4640	chr6: 30884084(NM_001954)	chr6: 30882773-30882896(score=554)	Regulation	SRX1885170	level 1	Prostate	H.sapiens
hsa-mir-4640	chr6: 30884538(NM_001297653)	chr6: 30882729-30882899(score=747)	Regulation	SRX1885171	level 1	Prostate	H.sapiens
hsa-mir-4640	chr6: 30884538(NM_001297653)	chr6: 30882733-30882893(score=828)	Regulation	SRX1885172	level 1	Prostate	H.sapiens
hsa-mir-4640	chr6: 30884538(NM_001297653)	chr6: 30882753-30882897(score=642)	Regulation	SRX1885200	level 1	Prostate	H.sapiens
hsa-mir-4640	chr6: 30884538(NM_001297653)	chr6: 30882756-30882878(score=370)	Regulation	SRX1885199	level 1	Prostate	H.sapiens
hsa-mir-4640	chr6: 30884538(NM_001297653)	chr6: 30882773-30882878(score=391)	Regulation	SRX1885169	level 1	Prostate	H.sapiens
hsa-mir-4640	chr6: 30884538(NM_001297653)	chr6: 30882773-30882896(score=554)	Regulation	SRX1885170	level 1	Prostate	H.sapiens
hsa-mir-4640	chr6: 30884538(NM_001297654)	chr6: 30882729-30882899(score=747)	Regulation	SRX1885171	level 1	Prostate	H.sapiens
hsa-mir-4640	chr6: 30884538(NM_001297654)	chr6: 30882733-30882893(score=828)	Regulation	SRX1885172	level 1	Prostate	H.sapiens
hsa-mir-4640	chr6: 30884538(NM_001297654)	chr6: 30882753-30882897(score=642)	Regulation	SRX1885200	level 1	Prostate	H.sapiens
hsa-mir-4640	chr6: 30884538(NM_001297654)	chr6: 30882756-30882878(score=370)	Regulation	SRX1885199	level 1	Prostate	H.sapiens
hsa-mir-4640	chr6: 30884538(NM_001297654)	chr6: 30882773-30882878(score=391)	Regulation	SRX1885169	level 1	Prostate	H.sapiens
hsa-mir-4640	chr6: 30884538(NM_001297654)	chr6: 30882773-30882896(score=554)	Regulation	SRX1885170	level 1	Prostate	H.sapiens
hsa-mir-4640	chr6: 30884550(NM_013993)	chr6: 30882729-30882899(score=747)	Regulation	SRX1885171	level 1	Prostate	H.sapiens
hsa-mir-4640	chr6: 30884550(NM_013993)	chr6: 30882733-30882893(score=828)	Regulation	SRX1885172	level 1	Prostate	H.sapiens
hsa-mir-4640	chr6: 30884550(NM_013993)	chr6: 30882753-30882897(score=642)	Regulation	SRX1885200	level 1	Prostate	H.sapiens
hsa-mir-4640	chr6: 30884550(NM_013993)	chr6: 30882756-30882878(score=370)	Regulation	SRX1885199	level 1	Prostate	H.sapiens
hsa-mir-4640	chr6: 30884550(NM_013993)	chr6: 30882773-30882878(score=391)	Regulation	SRX1885169	level 1	Prostate	H.sapiens
hsa-mir-4640	chr6: 30884550(NM_013993)	chr6: 30882773-30882896(score=554)	Regulation	SRX1885170	level 1	Prostate	H.sapiens
hsa-mir-4640	chr6: 30884980(NM_001202523)	chr6: 30882729-30882899(score=747)	Regulation	SRX1885171	level 1	Prostate	H.sapiens
hsa-mir-4640	chr6: 30884980(NM_001202523)	chr6: 30882733-30882893(score=828)	Regulation	SRX1885172	level 1	Prostate	H.sapiens
hsa-mir-4640	chr6: 30884980(NM_001202523)	chr6: 30882753-30882897(score=642)	Regulation	SRX1885200	level 1	Prostate	H.sapiens
hsa-mir-4640	chr6: 30884980(NM_001202523)	chr6: 30882756-30882878(score=370)	Regulation	SRX1885199	level 1	Prostate	H.sapiens
hsa-mir-4640	chr6: 30884980(NM_001202523)	chr6: 30882773-30882878(score=391)	Regulation	SRX1885169	level 1	Prostate	H.sapiens
hsa-mir-4640	chr6: 30884980(NM_001202523)	chr6: 30882773-30882896(score=554)	Regulation	SRX1885170	level 1	Prostate	H.sapiens
hsa-mir-4641	chr6: 41546426(NM_001012426)	chr6: 41545688-41545810(score=403)	Regulation	SRX1885171	level 1	Prostate	H.sapiens
hsa-mir-4641	chr6: 41546426(NM_001012427)	chr6: 41545688-41545810(score=403)	Regulation	SRX1885171	level 1	Prostate	H.sapiens
hsa-mir-4641	chr6: 41546426(NM_138457)	chr6: 41545688-41545810(score=403)	Regulation	SRX1885171	level 1	Prostate	H.sapiens
hsa-mir-4660	chr8: 9048445	chr8: 9045253-9045405(score=746)	Regulation	SRX1885172	level 1	Prostate	H.sapiens
hsa-mir-4660	chr8: 9048445	chr8: 9045262-9045400(score=657)	Regulation	SRX1885200	level 1	Prostate	H.sapiens
hsa-mir-4660	chr8: 9048445	chr8: 9045266-9045394(score=682)	Regulation	SRX1885170	level 1	Prostate	H.sapiens
hsa-mir-4660	chr8: 9048445	chr8: 9045267-9045419(score=732)	Regulation	SRX1885171	level 1	Prostate	H.sapiens
hsa-mir-4660	chr8: 9048445	chr8: 9045277-9045391(score=584)	Regulation	SRX1885169	level 1	Prostate	H.sapiens
hsa-mir-4660	chr8: 9048445	chr8: 9045278-9045400(score=537)	Regulation	SRX1885199	level 1	Prostate	H.sapiens
hsa-mir-544b	chr3: 124730453	chr3: 124730277-124730396(score=293)	Regulation	SRX1885171	level 2	Prostate	H.sapiens
hsa-mir-548ac	chr1: 116571093(NM_001144822)	chr1: 116573844-116573993(score=857)	Regulation	SRX1885170	level 1	Prostate	H.sapiens
hsa-mir-548ac	chr1: 116571093(NM_001144822)	chr1: 116573856-116573997(score=601)	Regulation	SRX1885169	level 1	Prostate	H.sapiens
hsa-mir-548ac	chr1: 116571093(NM_001779)	chr1: 116573844-116573993(score=857)	Regulation	SRX1885170	level 1	Prostate	H.sapiens
hsa-mir-548ac	chr1: 116571093(NM_001779)	chr1: 116573856-116573997(score=601)	Regulation	SRX1885169	level 1	Prostate	H.sapiens
hsa-mir-548ac	chr1: 116571093(NR_026665)	chr1: 116573844-116573993(score=857)	Regulation	SRX1885170	level 1	Prostate	H.sapiens
hsa-mir-548ac	chr1: 116571093(NR_026665)	chr1: 116573856-116573997(score=601)	Regulation	SRX1885169	level 1	Prostate	H.sapiens
hsa-mir-6132	chr7: 116953327(NM_018412)	chr7: 116952775-116952902(score=523)	Regulation	SRX1885171	level 1	Prostate	H.sapiens
hsa-mir-6132	chr7: 116953327(NM_021908)	chr7: 116952775-116952902(score=523)	Regulation	SRX1885171	level 1	Prostate	H.sapiens
hsa-mir-6732	chr1: 37480230	chr1: 37477355-37477472(score=346)	Regulation	SRX1885199	level 1	Prostate	H.sapiens
hsa-mir-6732	chr1: 37480230	chr1: 37477375-37477581(score=596)	Regulation	SRX1885170	level 1	Prostate	H.sapiens
hsa-mir-6732	chr1: 37480230	chr1: 37477376-37477520(score=515)	Regulation	SRX1885169	level 1	Prostate	H.sapiens
hsa-mir-6732	chr1: 37480230	chr1: 37479914-37480075(score=582)	Regulation	SRX1885200	level 1	Prostate	H.sapiens
hsa-mir-6732	chr1: 37480230	chr1: 37479915-37480077(score=665)	Regulation	SRX1885170	level 1	Prostate	H.sapiens
hsa-mir-6732	chr1: 37480230	chr1: 37479928-37480075(score=418)	Regulation	SRX1885199	level 1	Prostate	H.sapiens
hsa-mir-6732	chr1: 37480230	chr1: 37479928-37480088(score=569)	Regulation	SRX1885172	level 1	Prostate	H.sapiens
hsa-mir-6732	chr1: 37480230	chr1: 37479936-37480076(score=588)	Regulation	SRX1885169	level 1	Prostate	H.sapiens
hsa-mir-6732	chr1: 37480230	chr1: 37479948-37480087(score=632)	Regulation	SRX1885171	level 1	Prostate	H.sapiens
hsa-mir-6769b	chr1: 206470243(NM_001193321)	chr1: 206469541-206469705(score=805)	Regulation	SRX1885169	level 1	Prostate	H.sapiens
hsa-mir-6769b	chr1: 206470243(NM_001193321)	chr1: 206469563-206469721(score=896)	Regulation	SRX1885170	level 1	Prostate	H.sapiens
hsa-mir-6769b	chr1: 206470243(NM_001193321)	chr1: 206469565-206469726(score=624)	Regulation	SRX1885199	level 1	Prostate	H.sapiens
hsa-mir-6769b	chr1: 206470243(NM_001193321)	chr1: 206469567-206469731(score=622)	Regulation	SRX1885200	level 1	Prostate	H.sapiens
hsa-mir-6769b	chr1: 206470243(NM_001193321)	chr1: 206469571-206469734(score=648)	Regulation	SRX1885171	level 1	Prostate	H.sapiens
hsa-mir-6769b	chr1: 206470243(NM_001193322)	chr1: 206469541-206469705(score=805)	Regulation	SRX1885169	level 1	Prostate	H.sapiens
hsa-mir-6769b	chr1: 206470243(NM_001193322)	chr1: 206469563-206469721(score=896)	Regulation	SRX1885170	level 1	Prostate	H.sapiens
hsa-mir-6769b	chr1: 206470243(NM_001193322)	chr1: 206469565-206469726(score=624)	Regulation	SRX1885199	level 1	Prostate	H.sapiens
hsa-mir-6769b	chr1: 206470243(NM_001193322)	chr1: 206469567-206469731(score=622)	Regulation	SRX1885200	level 1	Prostate	H.sapiens
hsa-mir-6769b	chr1: 206470243(NM_001193322)	chr1: 206469571-206469734(score=648)	Regulation	SRX1885171	level 1	Prostate	H.sapiens
hsa-mir-6769b	chr1: 206470243(NM_014002)	chr1: 206469541-206469705(score=805)	Regulation	SRX1885169	level 1	Prostate	H.sapiens
hsa-mir-6769b	chr1: 206470243(NM_014002)	chr1: 206469563-206469721(score=896)	Regulation	SRX1885170	level 1	Prostate	H.sapiens
hsa-mir-6769b	chr1: 206470243(NM_014002)	chr1: 206469565-206469726(score=624)	Regulation	SRX1885199	level 1	Prostate	H.sapiens
hsa-mir-6769b	chr1: 206470243(NM_014002)	chr1: 206469567-206469731(score=622)	Regulation	SRX1885200	level 1	Prostate	H.sapiens
hsa-mir-6769b	chr1: 206470243(NM_014002)	chr1: 206469571-206469734(score=648)	Regulation	SRX1885171	level 1	Prostate	H.sapiens
hsa-mir-6821	chr22: 49962866	chr22: 49962473-49962596(score=437)	Regulation	SRX1885200	level 1	Prostate	H.sapiens
hsa-mir-6821	chr22: 49962866	chr22: 49962477-49962624(score=576)	Regulation	SRX1885170	level 1	Prostate	H.sapiens
hsa-mir-6821	chr22: 49962866	chr22: 49962478-49962600(score=458)	Regulation	SRX1885199	level 1	Prostate	H.sapiens
hsa-mir-6825	chr3: 127590775(NM_001136053)	chr3: 127591922-127592025(score=384)	Regulation	SRX1885170	level 1	Prostate	H.sapiens
hsa-mir-6825	chr3: 127590775(NM_001136053)	chr3: 127591938-127592055(score=347)	Regulation	SRX1885172	level 1	Prostate	H.sapiens
hsa-mir-6825	chr3: 127590775(NM_001142646)	chr3: 127591922-127592025(score=384)	Regulation	SRX1885170	level 1	Prostate	H.sapiens
hsa-mir-6825	chr3: 127590775(NM_001142646)	chr3: 127591938-127592055(score=347)	Regulation	SRX1885172	level 1	Prostate	H.sapiens
hsa-mir-6825	chr3: 127590775(NM_001353001)	chr3: 127591922-127592025(score=384)	Regulation	SRX1885170	level 1	Prostate	H.sapiens
hsa-mir-6825	chr3: 127590775(NM_001353001)	chr3: 127591938-127592055(score=347)	Regulation	SRX1885172	level 1	Prostate	H.sapiens
hsa-mir-6825	chr3: 127590775(NM_001353002)	chr3: 127591922-127592025(score=384)	Regulation	SRX1885170	level 1	Prostate	H.sapiens
hsa-mir-6825	chr3: 127590775(NM_001353002)	chr3: 127591938-127592055(score=347)	Regulation	SRX1885172	level 1	Prostate	H.sapiens
hsa-mir-6825	chr3: 127590775(NM_001353006)	chr3: 127591922-127592025(score=384)	Regulation	SRX1885170	level 1	Prostate	H.sapiens
hsa-mir-6825	chr3: 127590775(NM_001353006)	chr3: 127591938-127592055(score=347)	Regulation	SRX1885172	level 1	Prostate	H.sapiens
hsa-mir-6825	chr3: 127590775(NR_073377)	chr3: 127591922-127592025(score=384)	Regulation	SRX1885170	level 1	Prostate	H.sapiens
hsa-mir-6825	chr3: 127590775(NR_073377)	chr3: 127591938-127592055(score=347)	Regulation	SRX1885172	level 1	Prostate	H.sapiens
hsa-mir-6825	chr3: 127590775(NR_148226)	chr3: 127591922-127592025(score=384)	Regulation	SRX1885170	level 1	Prostate	H.sapiens
hsa-mir-6825	chr3: 127590775(NR_148226)	chr3: 127591938-127592055(score=347)	Regulation	SRX1885172	level 1	Prostate	H.sapiens
hsa-mir-7976	chr3: 127587176	chr3: 127591922-127592025(score=384)	Regulation	SRX1885170	level 1	Prostate	H.sapiens
hsa-mir-7976	chr3: 127587176	chr3: 127591938-127592055(score=347)	Regulation	SRX1885172	level 1	Prostate	H.sapiens
hsa-mir-7976	chr3: 127590775(NM_001136053)	chr3: 127591922-127592025(score=384)	Regulation	SRX1885170	level 1	Prostate	H.sapiens
hsa-mir-7976	chr3: 127590775(NM_001136053)	chr3: 127591938-127592055(score=347)	Regulation	SRX1885172	level 1	Prostate	H.sapiens
hsa-mir-7976	chr3: 127590775(NM_001142646)	chr3: 127591922-127592025(score=384)	Regulation	SRX1885170	level 1	Prostate	H.sapiens
hsa-mir-7976	chr3: 127590775(NM_001142646)	chr3: 127591938-127592055(score=347)	Regulation	SRX1885172	level 1	Prostate	H.sapiens
hsa-mir-7976	chr3: 127590775(NM_001353001)	chr3: 127591922-127592025(score=384)	Regulation	SRX1885170	level 1	Prostate	H.sapiens
hsa-mir-7976	chr3: 127590775(NM_001353001)	chr3: 127591938-127592055(score=347)	Regulation	SRX1885172	level 1	Prostate	H.sapiens
hsa-mir-7976	chr3: 127590775(NM_001353002)	chr3: 127591922-127592025(score=384)	Regulation	SRX1885170	level 1	Prostate	H.sapiens
hsa-mir-7976	chr3: 127590775(NM_001353002)	chr3: 127591938-127592055(score=347)	Regulation	SRX1885172	level 1	Prostate	H.sapiens
hsa-mir-7976	chr3: 127590775(NM_001353006)	chr3: 127591922-127592025(score=384)	Regulation	SRX1885170	level 1	Prostate	H.sapiens
hsa-mir-7976	chr3: 127590775(NM_001353006)	chr3: 127591938-127592055(score=347)	Regulation	SRX1885172	level 1	Prostate	H.sapiens
hsa-mir-7976	chr3: 127590775(NR_073377)	chr3: 127591922-127592025(score=384)	Regulation	SRX1885170	level 1	Prostate	H.sapiens
hsa-mir-7976	chr3: 127590775(NR_073377)	chr3: 127591938-127592055(score=347)	Regulation	SRX1885172	level 1	Prostate	H.sapiens
hsa-mir-7976	chr3: 127590775(NR_148226)	chr3: 127591922-127592025(score=384)	Regulation	SRX1885170	level 1	Prostate	H.sapiens
hsa-mir-7976	chr3: 127590775(NR_148226)	chr3: 127591938-127592055(score=347)	Regulation	SRX1885172	level 1	Prostate	H.sapiens
hsa-mir-877	chr6: 30571451	chr6: 30571393-30571514(score=335)	Regulation	SRX1885199	level 2	Prostate	H.sapiens
