# Supplementary material for: Identification of Potential Key Genes in Prostate Cancer with Gene Expression, Pivotal Pathways and Regulatory Networks Analysis Using Integrated Bioinformatics Methods
Source: MDPI journal article supplement (doi:10.3390/genes13040655), 2022-04-07
Supplement: s1 [file Supplementary File S4-S7.xlsx]

## Sheet: Sheet1
Supplementary file S4: Significant upregulated differentially expressed genes involved in GO Biological Process
Term	Count	Percent (%)	P-Value	Genes
GO:0008283: cell proliferation	30	5.07614	1.57535e-06	NAA60, CHRM3, UHRF1, BUB1B, MKI67, TYMS, DNPH1, CDC14A, AURKB, LARP1, MYC, TSPAN1, BUB1, PDK1, E2F8, TBX1, STIL, ENTPD5, SCRIB, WDR12, CDC25A, TPX2, KITLG, CENPF, MELK, CKS2, CDK1, ERG, SLC29A2, PICALM
GO:0007067: mitotic nuclear division	23	3.89171	4.85876e-06	CDCA5, BUB1B, YEATS4, CDC6, SKA3, CDC25A, AURKB, AURKA, ASPM, ANLN, TPX2, CENPF, CCNG2, NUF2, RUVBL1, PBK, CDK1, BIRC5, RCC1, OIP5, BUB1, SAC3D1, SPC25
GO:0000082: G1/S transition of mitotic cell cycle	14	2.36887	9.67925e-06	CDT1, RRM2, CDCA5, INHBA, CDC6, TYMS, CDC25A, DHFR, CDC45, CDK1, EIF4EBP1, MCM4, RCC1, CDKN3
GO:0000083: regulation of transcription involved in G1/S transition of mitotic cell cycle	7	1.18443	4.28685e-05	DHFR, CDT1, RRM2, CDC45, CDK1, CDC6, TYMS
GO:0051301: cell division	26	4.39932	4.76419e-05	CDCA5, NCAPG, BUB1B, SKA3, CDC14A, AURKA, CCNB1, NUF2, RUVBL1, RCC1, OIP5, BUB1, SAC3D1, CDK19, UBE2C, CDC6, KNSTRN, CDC25A, TPX2, CENPF, KIF18B, CCNG2, CKS2, CDK1, BIRC5, SPC25
GO:0007059: chromosome segregation	9	1.52284	0.000866031	TOP2A, NAA60, CENPF, NUF2, RCC1, OIP5, SKA3, KNSTRN, SPC25
GO:0051256: mitotic spindle midzone assembly	4	0.676819	0.00129148	RACGAP1, KIF4A, CDC14A, AURKB
GO:0006461: protein complex assembly	11	1.86125	0.00233592	CCNB1, OCLN, REPS2, CDK1, TCEB2, LPXN, LIN7A, WASF1, WASF3, ATPAF1, PICALM
GO:0007062: sister chromatid cohesion	10	1.69205	0.00347338	CENPU, CENPF, CDCA5, NUF2, CENPM, BIRC5, BUB1B, BUB1, AURKB, SPC25
GO:0042273: ribosomal large subunit biogenesis	5	0.846024	0.00585269	NOP16, RRS1, RPL35A, SURF6, WDR12
GO:0002181: cytoplasmic translation	5	0.846024	0.00585269	RPL35A, RPL22L1, RPL15, RPL29, FTSJ1
GO:0006260: DNA replication	12	2.03046	0.00646288	CDT1, BLM, RRM2, CDC45, KIAA0101, EXO1, CDK1, MCM4, CDC6, CHTF18, DTL, CDC25A
GO:0098609: cell-cell adhesion	17	2.87648	0.007055	PAICS, VASN, CORO1B, ANLN, MYO1B, KLC2, LARP1, FMNL2, EPCAM, FASN, MYO6, RUVBL1, RPL15, RPL29, PDLIM5, HIST1H3E, PICALM
GO:0006412: translation	16	2.70728	0.00873917	MRPS33, MRPL17, RPL35A, MRPL15, MRPL37, MRPL4, SLC25A27, SLC25A15, RPS29, RPL22L1, SLC25A42, RPL15, RPL29, SLC25A33, RPS24, RPS23
GO:0006468: protein phosphorylation	24	4.06091	0.00941791	CAMK2B, ACVRL1, CDK19, PRKAA1, NEK5, DAPK1, BUB1B, AURKB, HIPK2, AURKA, CAMKK2, SBK1, WNK2, GRK6, AAK1, PBK, BIRC5, TRIB3, ERG, TRIB1, FNIP2, BUB1, MAP4K4, PDK1
GO:0097421: liver regeneration	5	0.846024	0.0100138	MYC, TYMS, RPS24, EZH2, AURKA
GO:0032012: regulation of ARF protein signal transduction	4	0.676819	0.010828	CYTH3, CYTH2, PSD3, ARFGEF3
GO:0007051: spindle organization	4	0.676819	0.010828	ASPM, KNSTRN, AURKB, AURKA
GO:0007052: mitotic spindle organization	5	0.846024	0.0112899	STIL, CCNB1, RCC1, AURKA, SPC25
GO:0051726: regulation of cell cycle	10	1.69205	0.0114441	CENPF, CDK19, CCNB1, KIAA0101, CCNG2, TRIM36, DTL, PRR11, CDC25A, HIPK2
GO:0030574: collagen catabolic process	7	1.18443	0.0114814	COL1A1, ADAMTS2, COL2A1, MMP26, COL12A1, COL10A1, COL8A1
GO:0031536: positive regulation of exit from mitosis	3	0.507614	0.012117	UBE2C, CDCA5, BIRC5
GO:0006139: nucleobase-containing compound metabolic process	6	1.01523	0.0145539	CTPS1, AK5, TK1, TYMS, REXO2, SLC29A2
GO:0032466: negative regulation of cytokinesis	3	0.507614	0.0166337	CHMP4C, AURKB, E2F8
GO:0051988: regulation of attachment of spindle microtubules to kinetochore	3	0.507614	0.0166337	RACGAP1, ECT2, KNSTRN
GO:0007605: sensory perception of sound	10	1.69205	0.0174372	GABRB3, TBX1, TIMM8B, COL1A1, DIAPH1, GJB2, COL2A1, MYO6, TIMM13, CACNA1D
GO:0055114: oxidation-reduction process	28	4.73773	0.017798	CFAP61, MOXD1, STEAP4, DHRS11, TM7SF2, ALDH3B2, NDOR1, SH3BGRL3, DECR2, CBR4, CYP2J2, ABCC4, CYB5A, RRM2, PYCR1, MICAL2, FMO5, CYP39A1, DHFR, BDH1, MTHFD2, FASN, CHDH, PXDN, DNAJC10, NOX4, DUS1L, PAOX
GO:0006633: fatty acid biosynthetic process	6	1.01523	0.0184647	PRKAA1, FASN, OXSM, ACSM1, CBR4, ACACA
GO:0001501: skeletal system development	10	1.69205	0.0207302	COL1A1, COMP, VCAN, POSTN, COL2A1, COL12A1, COL10A1, COL9A2, SOX4, HAPLN1
GO:0051963: regulation of synapse assembly	3	0.507614	0.0217478	RAB17, PDLIM5, PPP1R9A
GO:0000076: DNA replication checkpoint	3	0.507614	0.0217478	CDT1, CDC45, CDC6
GO:0051983: regulation of chromosome segregation	3	0.507614	0.0217478	MKI67, BUB1, AURKB
GO:0021766: hippocampus development	6	1.01523	0.0246735	DLX1, DLX2, RELN, FGF13, EZH2, NME1
GO:0090103: cochlea morphogenesis	4	0.676819	0.0261285	TBX1, HPN, DVL1, CTHRC1
GO:0010873: positive regulation of cholesterol esterification	3	0.507614	0.0274201	APOC1, AGTR1, APOE
GO:0030199: collagen fibril organization	5	0.846024	0.027542	GREM1, COL1A1, ADAMTS2, COL2A1, COL12A1
GO:0043547: positive regulation of GTPase activity	26	4.39932	0.0299941	CAMK2B, RGS17, ARHGEF26, ADRB1, RAP1GAP, CYTH3, CYTH2, RACGAP1, MCF2L, CHN2, PSD3, RCC1, SH3BGRL3, ECT2, ARFGEF3, RAP1GAP2, FARP1, ARHGEF38, VAV2, ARHGAP32, KITLG, DNMBP, RABEP2, CDC42EP2, RGS10, EZH2
GO:0051216: cartilage development	6	1.01523	0.0301159	DLX2, COL2A1, COL10A1, HOXC4, TYMS, SULF1
GO:0035023: regulation of Rho protein signal transduction	7	1.18443	0.0328215	FARP1, DNMBP, ARHGEF26, MCF2L, ARHGEF38, ECT2, VAV2
GO:0055015: ventricular cardiac muscle cell development	3	0.507614	0.0336132	CCNB1, HEY2, CDK1
GO:0034501: protein localization to kinetochore	3	0.507614	0.0336132	CDK1, BUB1B, AURKB
GO:0046653: tetrahydrofolate metabolic process	3	0.507614	0.0336132	DHFR, MTHFD2, TYMS
GO:0015949: nucleobase-containing small molecule interconversion	4	0.676819	0.0365719	RRM2, CTPS1, AK5, NME1
GO:0034374: low-density lipoprotein particle remodeling	3	0.507614	0.0402915	AGTR1, APOE, PLA2G7
GO:0006259: DNA metabolic process	4	0.676819	0.0404607	TK1, MKI67, KPNA2, NME1
GO:0034644: cellular response to UV	5	0.846024	0.0405516	MYC, TP53INP1, PBK, CDC25A, AURKB
GO:0051056: regulation of small GTPase mediated signal transduction	9	1.52284	0.0458193	RAP1GAP2, ARHGAP32, RACGAP1, RALGAPA2, CHN2, MCF2L, ECT2, RAP1GAP, VAV2
GO:0045931: positive regulation of mitotic cell cycle	4	0.676819	0.0488351	CCNB1, CDK1, EIF4EBP1, BIRC5
GO:0007010: cytoskeleton organization	10	1.69205	0.0502643	DIAPH1, CECR2, TUBB2A, HIP1, FMNL2, MICAL2, YEATS4, APOE, WASF3, NECTIN2
GO:0051973: positive regulation of telomerase activity	4	0.676819	0.0533145	GREM1, PKIB, MYC, AURKB
GO:0000281: mitotic cytokinesis	4	0.676819	0.0533145	ANLN, RACGAP1, KIF4A, NUSAP1
GO:0071560: cellular response to transforming growth factor beta stimulus	5	0.846024	0.0565022	COL1A1, ACVRL1, POSTN, MAPK7, NOX4
GO:0000122: negative regulation of transcription from RNA polymerase II promoter	30	5.07614	0.0577511	DLX1, DLX2, ZNF350, UHRF1, LEF1, TWIST1, OTUD7B, AURKB, MYC, ZNF649, HEY2, FNIP2, MAP2K5, SPDEF, E2F8, PRMT6, PHF12, NFXL1, VAX2, HIPK2, HEYL, TBL1XR1, PHF14, ZNF613, TRIB3, TRIM37, TCF3, INSM1, SIM2, EZH2
GO:0048706: embryonic skeletal system development	4	0.676819	0.0579839	COL1A1, DLX1, SULF1, HOXC6
GO:0044344: cellular response to fibroblast growth factor stimulus	4	0.676819	0.0579839	TBX1, COL1A1, POSTN, MYC
GO:0021873: forebrain neuroblast division	2	0.338409	0.0583206	ASPM, LEF1
GO:0021893: cerebral cortex GABAergic interneuron fate commitment	2	0.338409	0.0583206	DLX1, DLX2
GO:0043967: histone H4 acetylation	4	0.676819	0.0628394	NAA60, LEF1, RUVBL1, YEATS4
GO:2000147: positive regulation of cell motility	3	0.507614	0.0629048	EPCAM, CLDN7, TWIST1
GO:0045821: positive regulation of glycolytic process	3	0.507614	0.0629048	PRKAA1, MYC, ENTPD5
GO:0019722: calcium-mediated signaling	5	0.846024	0.0636978	AGTR1, PPP1R9A, NCALD, CAMKK2, TRPM4
GO:0030198: extracellular matrix organization	11	1.86125	0.0667881	COL1A1, COMP, SMOC2, VCAN, POSTN, COL2A1, PXDN, COL10A1, COL8A1, COL9A2, HAPLN1
GO:0007076: mitotic chromosome condensation	3	0.507614	0.071199	CDCA5, NUSAP1, NCAPG
GO:0032270: positive regulation of cellular protein metabolic process	3	0.507614	0.071199	UHRF1, AGTR1, INHBA
GO:0010718: positive regulation of epithelial to mesenchymal transition	4	0.676819	0.0730916	COL1A1, LEF1, TWIST1, EZH2
GO:0005975: carbohydrate metabolic process	10	1.69205	0.0742295	GALNT7, GALNT3, GAA, MGAT4A, MGAT4B, B3GAT1, MAN2B1, PGLS, BPHL, XYLB
GO:1901796: regulation of signal transduction by p53 class mediator	8	1.35364	0.0754245	TPX2, BLM, PRKAA1, EXO1, TP53INP1, AURKB, HIPK2, AURKA
GO:0045944: positive regulation of transcription from RNA polymerase II promoter	38	6.42978	0.0777091	ACVRL1, TOP2A, DLX2, ZNF350, ONECUT2, UHRF1, LEF1, TWIST1, TCF20, MEOX1, NPAS2, MAPK7, EPCAM, MYC, ZNF649, CREB3L1, HEY2, MYO6, SMYD3, SOX4, MAP2K5, SPDEF, E2F8, TBX1, FOXD1, EBF2, SOX12, INHBA, ELL3, HIPK2, GREM1, HEYL, GAL, TBL1XR1, ZNF613, TCF3, MAML3, OGT
GO:0001843: neural tube closure	6	1.01523	0.0778706	CECR2, ST14, STIL, SHROOM3, TWIST1, SCRIB
GO:0060548: negative regulation of cell death	5	0.846024	0.0794483	MYC, AGR2, AGR3, SOX4, NPAS2
GO:0050995: negative regulation of lipid catabolic process	3	0.507614	0.0798234	PRKAA1, PDE3B, APOC1
GO:0003203: endocardial cushion morphogenesis	3	0.507614	0.0798234	ACVRL1, HEYL, TWIST1
GO:0006865: amino acid transport	4	0.676819	0.0840349	MYC, SLC43A1, SLC7A11, SLC7A1
GO:0050728: negative regulation of inflammatory response	6	1.01523	0.0847893	C1QTNF3, MAPK7, MMP26, PBK, APOE, SMPDL3B
GO:0031145: anaphase-promoting complex-dependent catabolic process	6	1.01523	0.0847893	CCNB1, UBE2C, CDK1, BUB1B, AURKB, AURKA
GO:0042787: protein ubiquitination involved in ubiquitin-dependent protein catabolic process	9	1.52284	0.0848884	RNF144A, CCNB1, UHRF1, UBE2C, HECTD4, CDK1, BUB1B, AURKB, AURKA
GO:0021544: subpallium development	2	0.338409	0.0861952	DLX1, DLX2
GO:0021882: regulation of transcription from RNA polymerase II promoter involved in forebrain neuron fate commitment	2	0.338409	0.0861952	DLX1, DLX2
GO:0018125: peptidyl-cysteine methylation	2	0.338409	0.0861952	RAB3B, RAB3D
GO:0003199: endocardial cushion to mesenchymal transition involved in heart valve formation	2	0.338409	0.0861952	HEY2, ERG
GO:0060480: lung goblet cell differentiation	2	0.338409	0.0861952	AGR2, SPDEF
GO:0034447: very-low-density lipoprotein particle clearance	2	0.338409	0.0861952	APOC1, APOE
GO:0008295: spermidine biosynthetic process	2	0.338409	0.0861952	SRM, AGMAT
GO:0070301: cellular response to hydrogen peroxide	5	0.846024	0.0879826	PRKAA1, MAPK7, CDK1, ECT2, EZH2
GO:1901216: positive regulation of neuron death	3	0.507614	0.0887514	AIMP2, APOE, PICALM
GO:0007018: microtubule-based movement	6	1.01523	0.0920204	KIF9, KLC2, KIF18B, RACGAP1, DNAH5, KIF4A
GO:0007162: negative regulation of cell adhesion	4	0.676819	0.09563	ACVRL1, PDE3B, CLDN7, LPXN
GO:0007080: mitotic metaphase plate congression	4	0.676819	0.09563	CCNB1, CDCA5, CHMP4C, RRS1
GO:0032467: positive regulation of cytokinesis	4	0.676819	0.09563	RACGAP1, CDC6, ECT2, AURKB
GO:0046655: folic acid metabolic process	3	0.507614	0.0979574	DHFR, MTHFD2, SLC19A1

## Sheet: Sheet2
Supplementary file 5: Significant upregulated differentially expressed genes involved in GO Cellular Component
Term	Count	Percent (%)	P-Value	Genes
GO:0005876: spindle microtubule	9	1.52284	3.32842e-05	TBL1XR1, PRC1, KIF4A, NUSAP1, CDK1, BIRC5, SKA3, AURKB, AURKA
GO:0005737: cytoplasm	187	31.6413	0.000514397	CYFIP2, RAB3B, PLEKHB1, THYN1, BUB1B, MKI67, PDCD2L, CDC14A, RASSF3, RUVBL1, NUSAP1, RCC1, OIP5, KPNA2, SOX4, TGM3, XYLB, RNF44, POSTN, DAPK1, RALGAPA2, OXSM, CLEC11A, SCRIB, CHD1L, KNSTRN, FTSJ1, CDC25A, SFRP4, RAB30, TXLNB, PPA2, C9ORF69, ERG, TRIB1, PRR11, TELO2, BLM, CDCA5, PXN, NCAPG, UAP1, AK5, SKA3, PLA2G7, ACACA, CORO1B, NPAS2, FAM83H, CCNB1, NDOR1, LARP1, CRACR2B, RACGAP1, MYO6, EIF4EBP1…
GO:0072686: mitotic spindle	7	1.18443	0.00109169	DIAPH1, RACGAP1, CDK1, ECT2, KNSTRN, CDC14A, AURKA
GO:0005654: nucleoplasm	108	18.2741	0.00109281	YEATS4, CDC14A, ALKBH2, MYC, RUVBL1, RCC1, OIP5, KPNA2, SOX4, RNF44, SCRIB, SOX12, CHD1L, CDC25A, TBL1XR1, MATR3, TRIB3, MAML3, BLM, CDCA5, PXN, UAP1, NPAS2, SEL1L3, CCNB1, LARP1, RACGAP1, MYO6, EIF4EBP1, SURF6, PIP5K1A, SMYD3, ZBTB7B, TRPM4, HOXC6, HIST1H3E, MAP2K6, CDT1, UBE2C, PHF12, ISG15, FANCB, CDC6, ELL3, PARP10, DHFR, ANLN, TPX2, RPS29, KIF4A, CDK1, TCF3, OGT, SIM2, RPS24, RPS23, EZH2, TO…
GO:0030496: midbody	12	2.03046	0.00133298	ASPM, CENPF, RACGAP1, PRC1, KIF4A, CHMP4C, CDK1, BIRC5, ECT2, SHCBP1, AURKB, AURKA
GO:0016020: membrane	88	14.89	0.00149996	ACVRL1, CYFIP2, HIP1, PDE3B, SLC7A11, CHTF18, MKI67, LCLAT1, BICD1, HK2, PDCD2L, TM7SF2, ACTG1, C1QTNF3, CREB3L1, RUVBL1, NUF2, KPNA2, ABCC4, KSR1, NUP210, GAA, HPCAL1, NIPA1, ATP11B, CTPS1, ATP11A, NME1, F5, SLC5A6, VCAN, MELK, TMEM106C, CDC42EP2, MCM4, MATR3, RPL29, PRR11, ERGIC1, TELO2, CERS2, RGS17, POPDC3, HPN, GCNT1, GDPD1, NCAPG, HMMR, SLC7A1, RAP1GAP, AGPAT3, CYTH2, CCNB1, KLC2, LARP1, CH…
GO:0051233: spindle midzone	5	0.846024	0.00190958	RACGAP1, BUB1B, CDC6, AURKB, AURKA
GO:0016363: nuclear matrix	9	1.52284	0.0071482	BLM, CENPF, ZNF350, UHRF1, KIF4A, ENC1, RUVBL1, MATR3, YEATS4
GO:0032133: chromosome passenger complex	3	0.507614	0.00790543	BIRC5, AURKB, AURKA
GO:0005829: cytosol	119	20.1354	0.00809416	CYFIP2, RAB3B, VARS, BUB1B, ACTG1, MYC, AP1S3, KPNA2, XYLB, CDC25A, MYL5, PLA2G16, DOPEY2, MTHFD2, CHMP4C, TRIB3, RPL29, CDCA5, PXN, NCAPG, UAP1, HMMR, AK5, CPLX1, RAP1GAP, ACACA, CORO1B, NPAS2, CCNB1, NDOR1, KLC2, RACGAP1, DPH2, MYO6, DVL1, EIF4EBP1, PIP5K1A, ECT2, MAP2K5, TRPM4, MAP2K6, RAP1GAP2, CDT1, CDK19, STIL, UBE2C, ISG15, SYNJ2, CDC6, PAICS, DHFR, ARHGAP32, AIMP2, TPX2, DIAPH1, RPS29, KI…
GO:0048471: perinuclear region of cytoplasm	30	5.07614	0.00815741	RAB3B, CYFIP2, BUB1B, BICD1, CORO1B, SH3RF1, AURKA, NDOR1, RAB40C, MYO6, TRIM68, MAL2, LPXN, TSPAN1, RAP1GAP2, GALNT3, CCDC78, MYRIP, INHBA, MEX3D, NME1, EPN3, PLA2G16, MYO1B, CENPF, KIAA0101, NOX4, TRIM37, CDKN3, PICALM
GO:0005819: spindle	10	1.69205	0.00864911	TPX2, CENPF, PRC1, NUSAP1, BIRC5, SHCBP1, MAP2K5, AURKB, SAC3D1, AURKA
GO:0005840: ribosome	12	2.03046	0.00913258	MRPL4, MRPL50, RPS29, MRPS33, MRPL17, RPL35A, RPL22L1, MRPL37, RPL15, RPL29, RPS24, RPS23
GO:0016327: apicolateral plasma membrane	4	0.676819	0.0121485	OCLN, CLDN3, CLDN8, CLDN7
GO:0000777: condensed chromosome kinetochore	8	1.35364	0.0131151	CENPU, NUF2, CENPM, BIRC5, BUB1B, KNSTRN, BUB1, SPC25
GO:0005913: cell-cell adherens junction	18	3.04569	0.0134658	SCRIB, PAICS, VASN, CORO1B, ANLN, MYO1B, KLC2, LARP1, FMNL2, FASN, MYO6, RUVBL1, RPL15, RPL29, PDLIM5, NECTIN2, HIST1H3E, PICALM
GO:0045120: pronucleus	3	0.507614	0.0159739	CENPF, EZH2, AURKA
GO:0016323: basolateral plasma membrane	12	2.03046	0.0160035	ABCC4, CHRM3, ST14, EPCAM, CLDN8, CLDN7, LIN7A, SCRIB, RAB17, CD300LG, SLC19A1, SLC29A2
GO:0005581: collagen trimer	8	1.35364	0.0174038	COL1A1, COL28A1, C1QTNF3, COL2A1, COL12A1, COL10A1, COL9A2, CTHRC1
GO:0016328: lateral plasma membrane	6	1.01523	0.0183471	GJB2, CLDN3, EPCAM, CLDN7, DVL1, FGF13
GO:0000940: condensed chromosome outer kinetochore	3	0.507614	0.0208937	CENPF, BUB1B, SKA3
GO:0000775: chromosome, centromeric region	6	1.01523	0.0243869	CENPF, CDCA5, NUF2, BIRC5, OIP5, MKI67
GO:0005788: endoplasmic reticulum lumen	12	2.03046	0.0244892	EDEM3, COL1A1, COL28A1, COL2A1, PTPRN2, COL12A1, DNAJC10, COL10A1, COL8A1, COL9A2, SLC27A2, F5
GO:0005578: proteinaceous extracellular matrix	15	2.53807	0.0248719	POSTN, ASPN, HAPLN1, COMP, SMOC2, ADAMTS2, VCAN, RELN, MMP26, PXDN, SLIT1, TFF3, COL10A1, COL9A2, CTHRC1
GO:0005856: cytoskeleton	18	3.04569	0.0431072	FARP1, HIP1, PXN, SHROOM3, SYNJ2, SLC7A11, BICD1, ACTG1, FAM83H, EPB41L4B, KITLG, DNMBP, PRC1, ENC1, TRIM36, WASF1, WASF3, MAP2K6
GO:0005923: bicellular tight junction	8	1.35364	0.0461385	EPB41L4B, OCLN, CLDN3, EPCAM, CLDN8, CLDN7, LIN7A, ECT2
GO:0005762: mitochondrial large ribosomal subunit	5	0.846024	0.0498004	MRPL4, MRPL50, MRPL17, MRPL15, MRPL37

## Sheet: Sheet3
Supplementary file 6: Significant upregulated differentially expressed genes involved in GO Molecular Function
Term	Count	Percent (%)	P-Value	Genes
GO:0005524: ATP binding	69	11.6751	0.000199645	ACVRL1, TOP2A, ATP8A2, CLPB, VARS, ACSM1, BUB1B, CHTF18, MKI67, HK2, ACTG1, UBE2Q1, RUVBL1, PBK, TK1, XYLB, PDK1, ABCC4, KSR1, DAPK1, ATP11B, CTPS1, ATP11A, CHD1L, NME1, KIF9, MELK, TXLNB, MCM4, TRIB3, TTLL12, TRIB1, GART, SLC27A2, CAMK2B, BLM, PRKAA1, DNAH5, AK5, ACACA, AURKB, AURKA, CAMKK2, MAPK7, ATP5D, MYO6, GRK6, PIP5K1A, BUB1, MAP2K5, TRPM4, MAP4K4, MAP2K6, CDK19, NEK5, UBE2C, CDC6, PAICS, …
GO:0003735 :structural constituent of ribosome	16	2.70728	0.00246504	MRPS33, MRPL17, RPL35A, MRPL15, MRPL37, MRPL4, SLC25A27, SLC25A15, RPS29, RPL22L1, SLC25A42, RPL15, RPL29, SLC25A33, RPS24, RPS23
GO:0004674: protein serine/threonine kinase activity	22	3.7225	0.00397	CAMK2B, ACVRL1, CDK19, PRKAA1, NEK5, DAPK1, BUB1B, AURKB, HIPK2, AURKA, CAMKK2, SBK1, MELK, MAPK7, WNK2, AAK1, PBK, CDK1, BUB1, MAP2K5, MAP4K4, MAP2K6
GO:0004672: protein kinase activity	21	3.5533	0.00495554	CAMK2B, CDK19, PRKAA1, KSR1, DAPK1, BUB1B, AURKB, HIPK2, AURKA, MELK, MAPK7, AAK1, PBK, CDK1, TRIB3, TRIB1, BUB1, MAP2K5, MAP4K4, MAP2K6, PDK1
GO:0016746: transferase activity, transferring acyl groups	6	1.01523	0.00546526	MBOAT2, PIGW, LCLAT1, CRAT, TGM3, AGPAT3
GO:0098641: cadherin binding involved in cell-cell adhesion	18	3.04569	0.00564708	SCRIB, PAICS, VASN, CORO1B, ANLN, MYO1B, KLC2, LARP1, FMNL2, EPCAM, FASN, MYO6, RUVBL1, RPL15, RPL29, PDLIM5, HIST1H3E, PICALM
GO:0005515: protein binding	287	48.5618	0.00709072	CYFIP2, CLPB, VARS, PLEKHB1, MKI67, RASSF3, MYC, CREB3L1, RCC1, AP1S3, SOX4, PDK1, DAPK1, ENTPD5, HPCAL1, SCRIB, KNSTRN, SFRP4, GAREM1, C9ORF69, PLEKHS1, CLDN8, CLDN7, AGTR1, COL8A1, TRIB3, TRIB1, TELO2, KCTD15, CDCA5, HPN, DCUN1D1, TWIST1, NCAPG, MRPL15, SKA3, CRACR2B, LARP1, RACGAP1, DPH2, MYO6, RRS1, ZSCAN12, HOXC4, GSE1, SURF6, PIP5K1A, TRPM8, APOE, ZBTB7B, TSPAN1, ZSCAN16, HIST1H3E, CDT1, PY…
GO:0035174: histone serine kinase activity	3	0.507614	0.00815467	PRKAA1, AURKB, AURKA
GO:0030020: extracellular matrix structural constituent conferring tensile strength	3	0.507614	0.0119946	COL2A1, COL12A1, COL9A2
GO:0003682: chromatin binding	21	3.5533	0.0122011	PRMT6, TOP2A, DLX1, DLX2, PRKAA1, CDCA5, PHF12, LEF1, EBF2, MEOX1, CENPF, CDC45, KIAA0101, EXO1, CREB3L1, CKS2, CDK1, RCC1, TRIM37, ERG, EZH2
GO:0001162: RNA polymerase II intronic transcription regulatory region sequence-specific DNA binding	3	0.507614	0.0215326	ZNF350, SMYD3, VAX2
GO:0005089: Rho guanyl-nucleotide exchange factor activity	7	1.18443	0.0258367	FARP1, DNMBP, ARHGEF26, MCF2L, ARHGEF38, ECT2, VAV2
GO:0005086: ARF guanyl-nucleotide exchange factor activity	4	0.676819	0.0360877	CYTH3, CYTH2, PSD3, ARFGEF3
GO:0050660: flavin adenine dinucleotide binding	6	1.01523	0.0399848	NDOR1, IVD, CHDH, NOX4, DUS1L, FMO5
GO:0005201: extracellular matrix structural constituent	6	1.01523	0.0472091	COL1A1, COMP, VCAN, COL2A1, PXDN, HAPLN1
GO:0005542: folic acid binding	3	0.507614	0.0544525	DHFR, TYMS, SLC19A1
GO:0004315: 3-oxoacyl-[acyl-carrier-protein] synthase activity	2	0.338409	0.0580177	FASN, OXSM
GO:0004012: phospholipid-translocating ATPase activity	3	0.507614	0.06232	ATP8A2, ATP11B, ATP11A
GO:0035326: enhancer binding	3	0.507614	0.06232	LEF1, TCF3, ELL3
GO:0042393: histone binding	8	1.35364	0.0689328	PRMT6, TBL1XR1, UHRF1, PHF12, LEF1, CKS2, RCC1, HIST1H3E
GO:0070402: NADPH binding	3	0.507614	0.0705441	DHFR, FASN, CBR4
GO:0016491: oxidoreductase activity	11	1.86125	0.0728116	CFAP61, ALDH3B2, RRM2, DHRS11, NDOR1, BDH1, FASN, NOX4, MICAL2, CBR4, PAOX
GO:0031434: mitogen-activated protein kinase kinase binding	3	0.507614	0.079097	KSR1, TRIB3, TRIB1
GO:0050661: NADP binding	4	0.676819	0.0830125	DHFR, NDOR1, FMO5, TM7SF2
GO:0055106: ubiquitin-protein transferase regulator activity	2	0.338409	0.0857542	TRIB3, TRIB1
GO:0035939: microsatellite binding	2	0.338409	0.0857542	HEYL, HEY2
GO:0031489: myosin V binding	3	0.507614	0.0879523	RAB3B, RAB3D, RAB39B
GO:0008301: DNA binding, bending	3	0.507614	0.0970849	TOP2A, FOXD1, LEF1

## Sheet: Sheet4
Supplementary file S7: Significant upregulated differentially expressed genes involved in GO KEGG Pathway
Term	Count	Percent (%)	P-Value	Genes
hsa04110: Cell cycle	11	1.86125	0.00389936	CCNB1, CDC45, MYC, CDK1, MCM4, BUB1B, E2F3, CDC6, BUB1, CDC25A, CDC14A
hsa00512: Mucin type O-Glycan biosynthesis	5	0.846024	0.0130423	GALNT7, ST6GALNAC1, GALNT5, GALNT3, GCNT1
hsa04512: ECM-receptor interaction	8	1.35364	0.0150735	COL1A1, COMP, COL2A1, RELN, SV2C, HMMR, THBS2, THBS4
hsa01100: Metabolic pathways	50	8.46024	0.0154209	ST6GALNAC1, ACSM1, PIGW, LCLAT1, HK2, TM7SF2, TK1, PGLS, XYLB, OXSM, GAA, CTPS1, NME1, PLA2G16, BDH1, MTHFD2, IVD, CHDH, POLR1D, FBP1, GART, CERS2, GCNT1, UAP1, AK5, TYMS, PLA2G7, ACACA, AGPAT3, SRM, ALDH3B2, GMDS, MGAT5B, ATP5D, PIP5K1A, CYP2J2, GALNT7, GALNT5, RRM2, GALNT3, PYCR1, MBOAT2, SYNJ2, PAICS, AGMAT, DHFR, AMACR, FASN, MGAT4A, MGAT4B
hsa03010: Ribosome	10	1.69205	0.0205527	MRPL4, RPS29, MRPL17, RPL35A, RPL22L1, MRPL15, RPL15, RPL29, RPS24, RPS23
hsa00670: One carbon pool by folate	4	0.676819	0.0207194	DHFR, MTHFD2, TYMS, GART
hsa00061 :Fatty acid biosynthesis	3	0.507614	0.0560384	FASN, OXSM, ACACA
hsa04670: Leukocyte transendothelial migration	8	1.35364	0.0566026	MYL5, OCLN, CLDN3, CLDN8, PXN, CLDN7, VAV2, ACTG1
hsa00240: Pyrimidine metabolism	7	1.18443	0.0818282	RRM2, ENTPD5, POLR1D, CTPS1, TK1, TYMS, NME1
hsa04510: Focal adhesion	11	1.86125	0.0890616	COL1A1, COMP, DIAPH1, MYL5, COL2A1, RELN, PXN, THBS2, THBS4, VAV2, ACTG1
