# Supplementary material for: Identification of Potential Key Genes in Prostate Cancer with Gene Expression, Pivotal Pathways and Regulatory Networks Analysis Using Integrated Bioinformatics Methods
Source: MDPI journal article supplement (doi:10.3390/genes13040655), 2022-04-07
Supplement: s1 [file Supplementary file S8-S11.xlsx]

## Sheet: Sheet1
Supplementary file S8: Significant downregulated differentially expressed genes involved in GO Biological Process
Term	Count	Percent (%)	P-Value	Genes
GO:0001525: angiogenesis	39	3.32481	2.49179e-09	CLIC4, NRP2, FLT1, EPAS1, NRXN1, NRXN3, PTEN, NDNF, RORA, HIF3A, PTGS2, ARHGAP22, ADGRG1, HEY1, ANPEP, KDR, CCL2, HOXA7, EPHB1, PROK1, JAM3, VAV3, TGFB2, ANGPT1, ANXA2, UNC5B, CAV1, DAB2IP, PRKCA, RHOB, VEGFA, CEACAM1, EMCN, ID1, MMP19, ANG, CSPG4, ANGPTL4, FGFR2
GO:0007155: cell adhesion	61	5.20034	3.97303e-09	LGALS3BP, SRPX, SPON1, NRP2, ITGB4, TNC, RND3, ROBO1, CDH3, ITGB8, PGM5, DST, ITGA2, PRKCA, EMP2, ATP1B2, OLFM4, ATP1B1, MTSS1, RHOB, AZGP1, CEACAM1, FEZ1, COL6A1, COL4A6, ANOS1, PKP1, ITGA7, CD47, SSX2IP, CD44, VCL, DSC3, ITGA9, PCDH10, LAMA3, NEDD9, DPT, LPP, PCDH18, NUAK1, ADGRG1, EFS, CLCA2, CCL2, SYMPK, AOC3, LAMB3, LAMB4, LSAMP, SORBS2, SORBS1, SELE, FERMT1, AFDN, KITLG, CXCL12, COL7A1, CNT…
GO:0001666: response to hypoxia	29	2.47229	8.10108e-07	CAMK2D, EPAS1, ITPR1, DPP4, ALAD, PDLIM1, PAK1, PENK, CASP1, CCL2, CD38, TGFB2, MYOCD, TGFB3, PRKCB, CAV1, ITGA2, ATP1B1, SOD3, VEGFA, TGFBR3, BMP2, CXCL12, KCNMA1, CAT, ANG, ANGPTL4, CRYAB, AJUBA
GO:0006936: muscle contraction	21	1.79028	3.46063e-06	TPM4, STAC, TPM2, TPM1, MYOF, LMOD1, SORBS1, ACTG2, SLC8A1, MYLK, GJA1, DES, ASPH, CALD1, SLMAP, SCN7A, MYH11, CALM1, CRYAB, MYL9, VCL
GO:0007411: axon guidance	26	2.21654	5.88642e-06	MEG3, ROBO3, NRP2, NRXN1, NTN4, NRXN3, GATA3, EFNA5, NTN1, ROBO1, FLRT3, KIF5C, GPC1, SLIT2, SPTAN1, EPHB1, EPHA5, TGFB2, UNC5D, ENAH, NR4A3, CXCL12, FEZ1, ANOS1, B3GNT2, NECTIN1
GO:0031581: hemidesmosome assembly	7	0.59676	2.71427e-05	COL17A1, LAMB3, DST, ITGB4, KRT14, LAMA3, KRT5
GO:0071456: cellular response to hypoxia	18	1.53453	3.81993e-05	PTGIS, ACAA2, EPAS1, PTEN, STC1, NDNF, RORA, PTN, FMN2, PTGS2, SLC8A1, VEGFA, RGCC, KCNMB1, BCL2, PPARGC1A, KCNK3, PPARD
GO:0042493: response to drug	37	3.15431	4.55365e-05	ADCYAP1R1, PTEN, WFDC1, GATA3, PTN, PTGS2, ADRA1A, SLC8A1, ALAD, CDH3, TBXA2R, CD38, PPARGC1A, B2M, TIMP4, FZD1, TGIF1, VAV3, TGFB2, AOC1, ANXA1, UBE2B, SRD5A2, ACSL1, ITGA2, STAT3, SORD, DUSP6, CDK9, DAB1, ACTC1, CAT, SCGB1A1, BCL2, LCN2, KCNK3, ABCG2
GO:0010628: positive regulation of gene expression	33	2.8133	6.55035e-05	CITED1, TNC, FBLN1, ACTG2, GJA1, TRIM6, C1QTNF1, CDH3, LAMP3, ITGB8, LDLR, NTRK2, TGFB2, ODAM, CAV1, NTRK3, STAT3, SERPINB9, TGFBR1, QKI, VEGFA, BMP2, ACTC1, RGCC, ID2, ALDH1A2, ID1, KIT, LCN2, CNTN1, SPRY2, TLR3, PPARD
GO:0030198: extracellular matrix organization	27	2.30179	8.07073e-05	VIT, COL13A1, ITGB4, LAMA3, TNC, NDNF, FBLN1, OLFML2A, NID1, KDR, ITGB8, JAM3, COL27A1, LAMB3, FOXF1, ITGA2, SERPINB5, CRISPLD2, COL7A1, COL6A1, COL4A6, COL9A1, COL4A5, ITGA7, CD47, CD44, ITGA9
GO:0002576: platelet degranulation	18	1.53453	9.57365e-05	CFD, LGALS3BP, TGFB2, WDR1, TGFB3, PCDH7, RARRES2, PLG, IGF1, CLU, TUBA4A, VEGFA, TF, CD9, TIMP3, FLNA, CALM1, VCL
GO:0030336: negative regulation of cell migration	17	1.44928	0.000119117	CLIC4, IGFBP5, TPM1, MAGI2, PTEN, STC1, PTN, RHOB, ROBO1, BST2, RRAS, DLC1, DPYSL3, BCL2, SLIT2, SRGAP3, VCL
GO:0048565: digestive tract development	10	0.852515	0.000138909	MYOCD, TGFB3, FOXF1, ITGB4, TRPS1, PDGFC, KIT, FAT4, GATA3, FGFR2
GO:0048661: positive regulation of smooth muscle cell proliferation	13	1.10827	0.000157203	CAMK2D, ITGA2, AKR1B1, IGF1, PTGS2, EGFR, NR4A3, ID2, NAMPT, RBPMS2, PPARGC1A, IL6R, FGFR2
GO:0030154: cell differentiation	48	4.09207	0.000158142	MEG3, CLIC4, ADCYAP1R1, FLT1, NDRG3, BEX1, COL13A1, ZAK, ARHGEF28, FHL1, WIPF3, CREM, ADIRF, SPATA2, NDRG2, CHRDL1, SPATA6, DLL1, ETS2, ARHGAP22, PURA, CSRP2, MECOM, SOX15, PLAGL1, ANPEP, PEG10, SH3PXD2B, NHS, GPM6B, JAG2, SPAG8, ANGPT1, SRD5A2, EYA4, ETV5, DUSP6, RHOB, TTLL7, NELL1, ELF1, ELF4, SMOC1, MAL, MMP19, ANGPTL4, ZNF750, PPARD
GO:1901687: glutathione derivative biosynthetic process	8	0.682012	0.000181907	GSTM4, GSTM3, GSTM2, GSTM1, GSTO2, MGST3, GSTP1, GSTM5
GO:0042060: wound healing	15	1.27877	0.000205924	TGFB2, SDC4, TGFB3, TPM1, TNC, NRG1, CELSR1, EGFR, TGFBR1, DCBLD2, PAK1, CDH3, SDC1, ITGA9, PPARD
GO:0007160: cell-matrix adhesion	16	1.36402	0.000216997	COL17A1, COL13A1, ITGB4, ITGA2, EMP2, SORBS1, NID1, SGCE, BCL2L11, ITGB8, ITGA7, MUC4, CD44, FERMT2, VCL, JAM3
GO:0043410: positive regulation of MAPK cascade	15	1.27877	0.000235753	NTRK2, FLT1, CAV2, DAB2IP, LPAR1, IGF1, ADRA1A, BMP2, C1QTNF1, KIT, KDR, FAS, TNFRSF25, IL6R, FGFR2
GO:0050680: negative regulation of epithelial cell proliferation	12	1.02302	0.000345706	CDKN1C, TGFBR3, TGFB2, RGN, DAB2IP, PTEN, WFDC1, PTN, MCC, FGFR2, MTSS1, PPARD
GO:1903779: regulation of cardiac conduction	12	1.02302	0.000345706	PLN, ASPH, NPR2, TRPC1, ITPR1, ATP2B4, FXYD6, ATP1B3, ATP1A2, ATP1B2, ATP1B1, SLC8A1
GO:0042178: xenobiotic catabolic process	5	0.426257	0.000355598	GSTM4, GSTM3, GSTM2, GSTM1, ACSL1
GO:0055119: relaxation of cardiac muscle	6	0.511509	0.000383036	CAMK2D, GSTM2, PLN, ATP1A2, ATP1B1, SLC8A1
GO:0030007: cellular potassium ion homeostasis	6	0.511509	0.000383036	CAMK2D, KCNMA1, ATP1B3, ATP1A2, ATP1B2, ATP1B1
GO:0001934: positive regulation of protein phosphorylation	19	1.61978	0.000432859	FZD1, NTRK2, EPHA7, CD40, ANXA2, ODAM, NTRK3, RARRES2, EFNA5, EGFR, VEGFA, CLIP3, PAK1, BMP2, EDNRB, CCND2, P2RY1, KDR, FAM20A
GO:0030335: positive regulation of cell migration	24	2.04604	0.000485103	FLT1, FOXF1, NTRK3, SEMA6D, PRKCA, IRS2, PIK3R1, IGF1, EGFR, TGFBR1, SYNE2, MYLK, VEGFA, PAK1, BMP2, FAM110C, PDGFC, TRIP6, KIT, KDR, GCNT2, SNAI2, ROR2, LGR6
GO:0010881: regulation of cardiac muscle contraction by regulation of the release of sequestered calcium ion	7	0.59676	0.000558842	CAMK2D, GSTM2, PLN, ASPH, ATP1A2, CALM1, SLC8A1
GO:0018916: nitrobenzene metabolic process	4	0.341006	0.000767412	GSTM4, GSTM3, GSTM2, GSTM1
GO:0007165: signal transduction	95	8.09889	0.000808604	LGALS3BP, CHRM1, IRS1, IRS2, NR3C1, ADRA1A, GJA1, SLC22A17, NAMPT, PDE4B, CASP1, PDE4A, CD38, HLA-DOA, PDE8B, PRKG1, TLE2, ANXA1, IGFBP5, EDN3, UNC5B, PRKCB, PDE4D, FST, MAGI2, CARTPT, UNC5D, MR1, GNL1, TGFBR1, ZNF516, KIT, S100A6, PKP1, TNFRSF25, PGR, ROR2, MET, TLR3, NDRG3, SDC4, EPAS1, NRXN1, MGST3, IGSF1, NRXN3, CREM, ITPR1, NEDD9, PIK3R1, GATA3, NDRG2, EGFR, ARHGAP22, IL1RL1, EBP, ARHGAP20, …
GO:0050731: positive regulation of peptidyl-tyrosine phosphorylation	14	1.19352	0.000913982	ANGPT1, LRP4, NRG1, CCK, IGF1, EFNA5, VEGFA, KITLG, ENPP2, CNTN1, CSPG4, PLPP3, IL6R, CD44
GO:0030879: mammary gland development	7	0.59676	0.00101043	BCL2L11, TGFB3, CAV1, ITGA2, IRS2, NRG1, TBX3
GO:0042552: myelination	10	0.852515	0.00121382	NAB1, MALL, ADGRG6, PMP22, LPAR1, MAL, TSPAN2, ACSBG1, QKI, JAM3
GO:0006198: cAMP catabolic process	6	0.511509	0.00125297	PDE11A, PDE10A, PDE4D, PDE4B, PDE4A, PDE8B
GO:0014068: positive regulation of phosphatidylinositol 3-kinase signaling	12	1.02302	0.00128443	NTRK2, TGFB2, FLT1, ANGPT1, UNC5B, PDGFC, KIT, CAT, KDR, NRG1, IGF1, PPARD
GO:0007623: circadian rhythm	13	1.10827	0.00130867	KLF10, NTRK2, NTRK3, EGFR, RPE65, PER2, THRAP3, ID1, NAMPT, ID4, FAS, PPARGC1A, PROK1
GO:0008360: regulation of cell shape	19	1.61978	0.00138405	ANXA1, WDR1, TPM1, WIPF3, LPAR1, PTN, COCH, TTBK2, VEGFA, PALMD, DLC1, CDC42EP4, RHOJ, PDPN, KIT, KDR, CCL2, ITGA7, FERMT2
GO:0008219: cell death	9	0.767263	0.00163526	TGFB2, ZAK, PTGER3, PMP22, EMP1, EMP2, SNCAIP, CLU, FOSL2
GO:0035924: cellular response to vascular endothelial growth factor stimulus	7	0.59676	0.00169976	FLT1, DAB2IP, KDR, HSPB1, GAS1, MT1G, VEGFA
GO:0070373: negative regulation of ERK1 and ERK2 cascade	11	0.937766	0.00182221	GSTP1, DAB2IP, PTEN, TIMP3, SPRY2, FBLN1, SPRY1, NDRG2, GBP1, ATF3, DUSP6
GO:0032060: bleb assembly	5	0.426257	0.00185062	PMP22, LPAR1, EMP1, EMP2, MYLK
GO:0008284: positive regulation of cell proliferation	44	3.75107	0.00211193	FLT1, CHRM1, IRS1, PTEN, TNC, IRS2, PTN, NTN1, DLL1, EGFR, DPP4, PURA, PAK1, EDNRB, CCND2, NAMPT, PDGFC, KDR, GCNT2, S1PR3, IL6R, PROK1, NTRK2, TGFB2, MYOCD, EDN3, ST8SIA1, NTRK3, STAT3, NRG1, EMP2, CCK, IGF1, TGFBR1, TBX3, VEGFA, RAD51B, ALDH1A2, KIT, ID4, BCL2, CD47, ATF3, FGFR2
GO:0048041: focal adhesion assembly	7	0.59676	0.00215535	ITGA2, DLC1, TRIP6, BCL2, SORBS1, AJUBA, FERMT2
GO:0098869: cellular oxidant detoxification	12	1.02302	0.00237928	DUOX1, GSTM2, GPX2, GSTO2, GPX3, MGST3, GSTP1, TXNL1, CAT, FAM213A, PTGS2, PTGS1
GO:0032355: response to estradiol	14	1.19352	0.0024185	ADCYAP1R1, ANXA1, GSTP1, STAT3, PTEN, WFDC1, PTN, PTGS2, ALDH1A2, CAT, PENK, RBBP8, CD38, CRYAB
GO:2000134: negative regulation of G1/S transition of mitotic cell cycle	7	0.59676	0.00269727	CTDSP2, FHL1, PTEN, BCL2, JADE1, ZNF655, DACT1
GO:0060612: adipose tissue development	7	0.59676	0.00269727	ID2, SH3PXD2B, NAMPT, ZNF516, PPARGC1A, SPG20, PPARD
GO:0070372: regulation of ERK1 and ERK2 cascade	7	0.59676	0.00269727	TGFBR3, CEACAM1, EPHA7, RRAS, GSTP1, EPHB1, FGFR2
GO:0007219: Notch signaling pathway	16	1.36402	0.00291156	JAG2, MAML2, PSEN1, DLL1, KRT19, BMP2, PLN, HEY1, PERP, DNER, CNTN1, SNAI2, S1PR3, FAT4, TIMP4, TP63
GO:0045785: positive regulation of cell adhesion	9	0.767263	0.00313326	VAV3, ADGRG1, CXCL12, ANGPT1, ITGA2, TPM1, PRKCA, NRG1, VEGFA
GO:0060070: canonical Wnt signaling pathway	13	1.10827	0.00316151	FZD1, TCF7L2, TCF7L1, UBE2B, FZD7, PTEN, DIXDC1, PSEN1, CDH3, SDC1, SNAI2, NDP, TBL1X
GO:0001764: neuron migration	15	1.27877	0.0032292	NTRK2, NDE1, NTRK3, NDNF, CCK, GATA3, PSEN1, CELSR1, NTN1, GJA1, CXCL12, DNER, KIAA0319, PRKG1, NDEL1
GO:0086004: regulation of cardiac muscle cell contraction	5	0.426257	0.00396944	PLN, PDE4D, PDE4B, STC1, ATP1A2
GO:0060314: regulation of ryanodine-sensitive calcium-release channel activity	6	0.511509	0.003989	CAMK2D, JPH2, PLN, ASPH, PDE4D, CALM1
GO:0031069: hair follicle morphogenesis	7	0.59676	0.00407884	FOXQ1, TGFB2, IGFBP5, KRT17, BCL2, TP63, FGFR2
GO:0001822: kidney development	13	1.10827	0.00425264	CDKN1C, TGFB2, KCNJ8, MME, SERPINF1, LRP4, GATA3, TGFBR1, VEGFA, BCL2L11, ADAMTS1, ALDH1A2, RGN
GO:0006928: movement of cell or subcellular component	13	1.10827	0.00425264	TPM4, TPM1, STAT3, HSPB1, IGF1, PTGS2, SERPINB5, MTSS1, CALD1, ENPP2, ANOS1, CD9, VCL
GO:0010951: negative regulation of endopeptidase activity	16	1.36402	0.00474062	ITIH5, SERPINB11, CSTA, SERPINB1, LXN, SERPINF1, WFDC1, SERPINB9, WFDC2, SERPINB5, BST2, COL7A1, SPOCK3, CPAMD8, ANOS1, TIMP4
GO:0010595: positive regulation of endothelial cell migration	9	0.767263	0.00482938	CCBE1, NRP2, ANGPT1, ADGRA2, KDR, PRKCA, GATA3, RHOB, VEGFA
GO:0006749: glutathione metabolic process	10	0.852515	0.00494743	GSTM4, CLIC6, GSTM3, GSTM2, CLIC4, GGT7, GSTM1, GSTO2, GSTP1, GSTM5
GO:0086064: cell communication by electrical coupling involved in cardiac conduction	5	0.426257	0.0054703	GJA1, ATP1A2, ATP1B2, ATP1B1, SLC8A1
GO:0060317: cardiac epithelial to mesenchymal transition	5	0.426257	0.0054703	TGFBR3, TGFB2, BMP2, HEY1, TGFBR1
GO:0045600: positive regulation of fat cell differentiation	9	0.767263	0.0055278	BMP2, CEBPB, WIF1, ID2, RARRES2, SH3PXD2B, ADIRF, SNAI2, PPARD
GO:0032956: regulation of actin cytoskeleton organization	9	0.767263	0.0055278	BST2, EPHA5, TGFB2, ODAM, DLC1, DIXDC1, CELSR1, EFNA5, GPM6B
GO:0006805: xenobiotic metabolic process	12	1.02302	0.00559542	AOC3, CYP3A7-CYP3A51P, AOC1, NAT1, GSTO2, MGST3, GSTP1, RORA, CYP3A4, CYP3A5, CES1, PTGS1
GO:0007399: nervous system development	29	2.47229	0.00560123	CHRM1, BEX1, NAB1, PTN, CLN8, EFNA5, CHRDL1, PCDH18, ROBO1, PURA, EDNRB, NDP, GPM6B, NDEL1, RBFOX2, STAT3, LSAMP, NRG1, GFRA1, NAV2, VEGFA, TTLL7, NELL1, ZEB2, DLG4, MAP1B, FEZ1, MPPED2, NBL1
GO:0006776: vitamin A metabolic process	4	0.341006	0.00587507	ALDH1A2, RBP1, RPE65, PPARD
GO:0051151: negative regulation of smooth muscle cell differentiation	4	0.341006	0.00587507	RCAN1, PRDM6, RBPMS2, MED28
GO:0030203: glycosaminoglycan metabolic process	7	0.59676	0.00592358	CHST9, SDC4, GPC1, SDC2, SDC1, CSPG4, GPC6
GO:0048662: negative regulation of smooth muscle cell proliferation	7	0.59676	0.00592358	IGFBP5, OGN, ANG, NDRG2, PPARGC1A, SF1, PPARD
GO:0016337: single organismal cell-cell adhesion	14	1.19352	0.00602028	CSTA, CD93, COL13A1, FOXF1, PSEN1, NTN1, EGFR, CDH3, EMCN, PDPN, PKP1, CD44, NECTIN1, MPZL2
GO:0051592: response to calcium ion	10	0.852515	0.00626661	S100A16, GIPR, TRPC1, CAV1, KCNMA1, PENK, SDC1, CALM1, AQP3, EGFR
GO:0043406: positive regulation of MAP kinase activity	10	0.852515	0.00701999	KITLG, CD40, FLT1, EDN3, PDGFC, KIT, PSEN1, AJUBA, EGFR, VEGFA
GO:0014912: negative regulation of smooth muscle cell migration	5	0.426257	0.00730746	IGFBP5, SEMA6D, SLIT2, PPARGC1A, PPARD
GO:0003407: neural retina development	5	0.426257	0.00730746	TGFB2, SMARCD3, ATP2B4, PSEN1, RPE65
GO:0033138: positive regulation of peptidyl-serine phosphorylation	11	0.937766	0.00736579	NTRK2, PAK1, TRIM6, ANGPT1, NTRK3, CAV1, BCL2, ATP2B4, SPRY2, CD44, VEGFA
GO:0006874: cellular calcium ion homeostasis	13	1.10827	0.00798221	CD40, SLC24A3, EDN3, PRKCB, CAV1, ATP2B4, STC1, ATP1B1, TMEM165, PLN, CXCL12, RGN, CCL2
GO:0000122: negative regulation of transcription from RNA polymerase II promoter	59	5.02984	0.00835454	CDKN1C, PRDM5, ATN1, FHL2, ZBTB20, TFCP2L1, N4BP2L2, ETS2, EDNRB, HEY1, TRIM29, SOX15, TRPS1, HOXA7, LMCD1, TP63, DACT1, TGIF1, KLF10, MYOCD, ZHX2, TSC22D3, FST, ZEB2, MAF, AJUBA, ATF3, PPARD, TSHZ3, GLIS3, PSEN1, GATA3, IFI16, DNAJB5, RBBP8, TBL1X, SKIL, JAZF1, TCF7L2, PRRX1, BCL11A, FOXF1, CAV1, STAT3, DAB2IP, MEIS2, TBX3, VEGFA, PER2, BMP2, NR4A3, NFIA, ID2, SCGB1A1, ID1, BHLHE40, ID4, SNAI2, …
GO:0001933: negative regulation of protein phosphorylation	10	0.852515	0.00873262	ANGPT1, NTRK3, CTDSP2, PAQR3, DAB2IP, PTEN, FBLN1, SLIT2, PLPP3, PPARGC1A
GO:1901844: regulation of cell communication by electrical coupling involved in cardiac conduction	4	0.341006	0.0089932	CAMK2D, PDE4D, CAV1, CALM1
GO:0060231: mesenchymal to epithelial transition	4	0.341006	0.0089932	CITED1, BASP1, FZD7, GATA3
GO:1904706: negative regulation of vascular smooth muscle cell proliferation	4	0.341006	0.0089932	CNN1, TGFB3, GSTP1, TPM1
GO:0051965: positive regulation of synapse assembly	10	0.852515	0.00969929	NTRK2, CLSTN2, FLRT3, NRXN1, NTRK3, LRRTM2, NRXN3, SLITRK6, EFNA5, EPHB1
GO:0045907: positive regulation of vasoconstriction	7	0.59676	0.00973372	GJA1, TBXA2R, CAV1, CD38, PTGS2, ADRA1A, EGFR
GO:0061024: membrane organization	7	0.59676	0.00973372	SGCE, TBC1D1, SGCD, SGCB, LPCAT2, SFN, SGCG
GO:1903288: positive regulation of potassium ion import	3	0.255754	0.0098905	ATP1B3, ATP1B2, ATP1B1
GO:0070458: cellular detoxification of nitrogen compound	3	0.255754	0.0098905	GSTM3, GSTM2, GSTM1
GO:1903984: positive regulation of TRAIL-activated apoptotic signaling pathway	3	0.255754	0.0098905	PTEN, TIMP3, ATF3
GO:0008285: negative regulation of cell proliferation	36	3.06905	0.00989128	MEG3, BTG3, NRK, PTEN, DPT, PLG, GATA3, PTGS2, ADRA1A, DLL1, ADGRG1, ADAMTS1, SOX7, KLF10, TGFB2, MYOCD, TGFB3, MAGI2, RARRES1, STAT3, DAB2IP, P3H2, IFNLR1, PTPN14, BMP2, AZGP1, RGCC, ALDH1A2, DLC1, PMP22, SPRY2, CD9, SPRY1, IRF6, ROR2, BNIPL
GO:0001541: ovarian follicle development	8	0.682012	0.0103595	CEBPB, PCYT1B, KITLG, KIT, BCL2, MMP19, ANG, VEGFA
GO:0045944: positive regulation of transcription from RNA polymerase II promoter	76	6.47911	0.0105884	CD40, CITED1, MAML2, JADE1, SLC40A1, PSIP1, ADIRF, RORA, HIF3A, NR3C1, ETS2, HEY1, SOX15, TRPS1, NAMPT, HOXA7, TP63, MKL2, MYOCD, LMO4, LMO2, NRG1, TMEM173, ETV5, ELF1, ZEB2, MAF, ELF4, THRAP3, PGR, MET, TLR3, ATF3, ZNF750, CEBPB, BEX1, HLF, EPAS1, GLIS3, CREM, HOXD13, PIK3R1, GATA3, HOXD10, DLL1, EGFR, IFI16, PLAGL1, P2RY1, CYTL1, TBL1X, PPARGC1A, TCF7L2, SPAG8, PRRX1, AUTS2, TGFB3, BCL11A, FOXF…
GO:0008544: epidermis development	12	1.02302	0.0106056	ALDH3A2, COL17A1, STS, KRT17, LAMB3, KRT15, COL7A1, KRT14, LAMA3, EMP1, KRT5, ZNF750
GO:0030334: regulation of cell migration	11	0.937766	0.0108193	JAG2, CEACAM1, LMO4, DPYSL3, LAMA3, ENPP2, FLNA, AJUBA, NTN1, VCL, RHOB
GO:0007507: heart development	20	1.70503	0.0110889	TGFB2, NRP2, KCNJ8, FOXF1, NTRK3, PTEN, KCNAB1, GATA3, PTN, TGFBR1, ROBO1, GJA1, BMP2, FLRT3, TRPS1, ID1, SH3PXD2B, ARMC4, CDKL1, PPARD
GO:0009954: proximal/distal pattern formation	6	0.511509	0.0114371	ALDH1A2, LRP4, SP8, DLL1, HOXD10, TP63
GO:0010613: positive regulation of cardiac muscle hypertrophy	5	0.426257	0.0121004	CDK9, CAMK2D, NR4A3, PRKCA, IGF1
GO:0016477: cell migration	19	1.61978	0.0122252	TGFB2, FLT1, SDC4, NDE1, SDC2, ASAP3, PTEN, SORBS2, EMP2, TGFBR3, ADGRG1, CEACAM1, PALLD, SDC1, CSPG4, ANG, GPC6, LURAP1, NDEL1
GO:0007229: integrin-mediated signaling pathway	13	1.10827	0.0128855	VAV3, DST, ITGB4, ITGA2, NEDD9, FBLN1, CEACAM1, ADAMTS1, ITGB8, ITGA7, CD47, FERMT2, ITGA9
GO:0086009: membrane repolarization	4	0.341006	0.0129077	ATP1B3, ATP1A2, ATP1B2, ATP1B1
GO:0007494: midgut development	4	0.341006	0.0129077	DAB1, FOXF1, ALDH1A2, EGFR
GO:0060316: positive regulation of ryanodine-sensitive calcium-release channel activity	4	0.341006	0.0129077	GSTM2, JPH2, ASPH, CALM1
GO:1990573: potassium ion import across plasma membrane	4	0.341006	0.0129077	KCNJ8, ATP1A2, ATP1B1, KCNJ3
GO:0048103: somatic stem cell division	4	0.341006	0.0129077	TGFB2, FZD7, KIT, ZFP36L2
GO:0030324: lung development	11	0.937766	0.0129497	HSD11B1, CCBE1, EPAS1, CRISPLD2, FOXF1, ALDH1A2, PDPN, PTN, EGFR, FGFR2, VEGFA
GO:0001837: epithelial to mesenchymal transition	7	0.59676	0.0130826	TGFBR3, TGFB2, BMP2, SNAI2, S100A4, TGFBR1, FGFR2
GO:0007010: cytoskeleton organization	18	1.53453	0.0134637	SVIL, DST, MAST4, ZAK, TPM1, KRT13, NEDD9, KRT5, ADD3, TUBA4A, FTCD, DES, PALLD, KRT15, CCL2, AJUBA, PDZD8, SPTAN1
GO:0030206: chondroitin sulfate biosynthetic process	6	0.511509	0.0136221	CHST9, CHST11, DSE, CHST15, CSPG4, CHST3
GO:0016055: Wnt signaling pathway	20	1.70503	0.0137417	TCF7L2, TCF7L1, TLE2, DST, DIXDC1, LRP4, MCC, APCDD1, NDRG2, CELSR2, NKD1, DKK3, CYLD, WIF1, LRRFIP2, NDP, AMOTL1, LGR6, FERMT2, DACT1
GO:0010976: positive regulation of neuron projection development	12	1.02302	0.0147095	NTRK2, GPRC5B, RAP1A, BCL11A, FEZ1, SERPINF1, DPYSL3, MAGI2, DAB2IP, CNTN1, NDNF, PTN
GO:2000811: negative regulation of anoikis	5	0.426257	0.0151034	NTRK2, CAV1, BCL2, PDK4, SNAI2
GO:0048738: cardiac muscle tissue development	5	0.426257	0.0151034	PLN, SGCD, ALDH1A2, PTEN, SGCG
GO:0008283: cell proliferation	33	2.8133	0.0151154	CHRM1, CITED1, ZAK, PAK1IP1, INSIG1, PTEN, IRS2, EGFR, ZFP36L2, IFI16, PDPN, LIPG, NDP, FAM83B, KLF10, TCF7L2, TGFB2, ITGA2, SERPINF1, STAT3, EMP1, NRG1, EMP2, IGF1, CDK9, BST2, KITLG, NASP, BCL2, TACC1, CSPG4, MET, PPARD
GO:0014066: regulation of phosphatidylinositol 3-kinase signaling	11	0.937766	0.0153807	CEACAM1, KITLG, IRS1, KIT, IRS2, PIP5K1B, NRG1, PIK3R1, EGFR, FGFR2, IER3
GO:0007202: activation of phospholipase C activity	6	0.511509	0.0160713	ADCYAP1R1, LPAR1, ANG, SELE, ADRA1A, EGFR
GO:0006027: glycosaminoglycan catabolic process	6	0.511509	0.0160713	HGSNAT, SDC4, GPC1, SDC2, SDC1, GPC6
GO:0002053: positive regulation of mesenchymal cell proliferation	6	0.511509	0.0160713	PRRX1, FOXF1, IRS2, TP63, FGFR2, VEGFA
GO:0007568: aging	18	1.53453	0.016827	CDKN1C, IGFBP5, TGFB3, PDE4D, SERPINF1, STAT3, PTEN, ADRA1A, EDNRB, KCNMB1, P2RY1, CAT, KRT14, PENK, RGN, CCL2, CRYAB, PPARGC1A
GO:0050714: positive regulation of protein secretion	7	0.59676	0.0171638	TGFB2, TGFB3, ANG, IGF1, SYTL4, STXBP5L, EXPH5
GO:0043066: negative regulation of apoptotic process	39	3.32481	0.0172731	ZFAND6, GSTP1, PTEN, FHL2, SLC40A1, HSPB1, FMN2, PSEN1, PIK3R1, EGFR, SOCS3, EDNRB, CCND2, CHST11, KDR, FLNA, CD38, TP63, IER3, ANXA1, UBE2B, ANGPT1, RHBDD1, STAT3, SERPINB9, IGF1, TBX3, VEGFA, ACTC1, ID1, CAT, RGN, BCL2, SPRY2, FAS, ANGPTL4, CRYAB, CD44, PPARD
GO:0036376: sodium ion export from cell	4	0.341006	0.0176465	ATP1B3, ATP1A2, ATP1B2, ATP1B1
GO:0035265: organ growth	4	0.341006	0.0176465	BCL2, DLL1, ADRA1A, FGFR2
GO:0003149: membranous septum morphogenesis	4	0.341006	0.0176465	FZD1, TGFB2, ID2, FGFR2
GO:0003334: keratinocyte development	4	0.341006	0.0176465	PALLD, SFN, FOSL2, EXPH5
GO:0019371: cyclooxygenase pathway	4	0.341006	0.0176465	PTGIS, PTGDS, PTGS2, PTGS1
GO:0045892: negative regulation of transcription, DNA-templated	42	3.58056	0.0176936	CDKN1C, MEG3, CEBPB, TSHZ3, CITED1, PRDM6, NAB1, PRDM5, GMNN, FHL2, CREM, GATA3, PURA, TRIM6, MECOM, IFI16, HEY1, BASP1, CD38, HOXA7, SOX7, BEND5, TP63, FZD1, KLF10, TCF7L2, ZHX2, TLE2, RBFOX2, DAB2IP, NRG1, TBX3, DKK3, PER2, BMP2, MDFIC, ID2, KAT6A, ID1, BHLHE40, ID4, PPARD
GO:0045893: positive regulation of transcription, DNA-templated	43	3.66581	0.0183681	CDKN1C, MEG3, SMARCD3, CITED1, FHL2, RORA, GATA3, PSEN1, ETS2, CAND2, SEC14L2, MECOM, CD38, NDP, TBL1X, SOX7, PPARGC1A, TP63, FZD1, MYOCD, AFAP1L2, TGFB3, FOXF1, FZD7, STAT3, IGF1, TRERF1, TGFBR1, TBX3, SUPT3H, BMP2, ELF1, MDFIC, ASPH, ELF4, THRAP3, ID2, KAT6A, ZNF516, ZNF711, IRF6, ROR2, PPARD
GO:0009887: organ morphogenesis	12	1.02302	0.0184973	TLE2, BMP2, ITGA2, TRPS1, FHL1, PDGFC, GMNN, COL9A1, CCL2, GATA3, FGFR2, TBX3
GO:0010880: regulation of release of sequestered calcium ion into cytosol by sarcoplasmic reticulum	5	0.426257	0.0185368	CAMK2D, GSTM2, ASPH, PDE4D, CALM1
GO:0006939: smooth muscle contraction	5	0.426257	0.0185368	SMTN, PDE4D, MYH11, ADRA1A, MYLK
GO:0051781: positive regulation of cell division	8	0.682012	0.0187733	TGFB2, TGFB3, PDGFC, CAT, PTN, PROK1, FGFR2, VEGFA
GO:0031032: actomyosin structure organization	6	0.511509	0.0187969	CNN1, EPB41L4A, FRMD5, FRMD6, ACTC1, LURAP1
GO:0001938: positive regulation of endothelial cell proliferation	10	0.852515	0.0188716	BMP2, NRP2, CXCL12, CAV2, KDR, CCL2, PRKCA, ANG, TGFBR1, VEGFA
GO:1903278: positive regulation of sodium ion export from cell	3	0.255754	0.0190136	ATP1B3, ATP1B2, ATP1B1
GO:0090662: ATP hydrolysis coupled transmembrane transport	3	0.255754	0.0190136	ATP1B3, ATP1B2, ATP1B1
GO:0048070: regulation of developmental pigmentation	3	0.255754	0.0190136	BCL2L11, EDN3, KIT
GO:0008152: metabolic process	18	1.53453	0.0197502	GSTM4, GSTM3, GSTM2, ACSS3, GSTM1, ACAA2, ACSL1, GSTP1, INSIG1, ACSL4, ACSF2, AGPAT4, NAT1, LPCAT2, ACSBG1, ASPA, GSTM5, CES1
GO:0045471: response to ethanol	13	1.10827	0.0198153	ADCYAP1R1, GSTP1, NTRK3, STAT3, PTEN, TNC, GATA3, ALAD, ACTC1, TBXA2R, CAT, PENK, CCL2
GO:0030855: epithelial cell differentiation	10	0.852515	0.0205692	FZD1, LGALS3, TAGLN, BDH2, UPK1A, KRT14, FGFR2, CTSB, CES1, VEGFA
GO:0071407: cellular response to organic cyclic compound	9	0.767263	0.0210917	BMP2, CEBPB, IGFBP5, FOXF1, P2RY1, STAT3, CCL2, PAK3, TMEM173
GO:0006813: potassium ion transport	11	0.937766	0.0212372	SLC24A3, KCNJ8, KCNMB1, KCNMA1, ATP1B3, KCNAB1, ATP1A2, ATP1B2, ATP1B1, KCNK3, KCNJ3
GO:0008584: male gonad development	12	1.02302	0.0213963	TGFB2, KITLG, BCL2L11, NASP, SRD5A2, SOX15, KIT, BCL2, GATA3, MAMLD1, TGFBR1, TLR3
GO:0009314: response to radiation	6	0.511509	0.0218096	CXCL12, ZAK, PENK, BCL2, KRT13, SMC1A
GO:0010107: potassium ion import	6	0.511509	0.0218096	KCNJ8, ATP1B3, ATP1A2, ATP1B2, ATP1B1, KCNJ3
GO:0006695: cholesterol biosynthetic process	7	0.59676	0.0220437	IDI1, EBP, ACAA2, INSIG1, MSMO1, LSS, CES1
GO:0001568: blood vessel development	7	0.59676	0.0220437	TCF7L2, CEACAM1, FOXF1, ALDH1A2, PSEN1, PLPP3, TBX3
GO:0034220: ion transmembrane transport	21	1.79028	0.0222042	TSC22D3, ATP2B4, ATP1B3, ATP1A2, ATP1B2, ANO4, ATP1B1, AQP3, ANO5, UNC80, GJA1, ASPH, DLG4, CLCA2, S100A6, SFXN3, FXYD6, PLP2, CALM1, KCNK3, CLCA4
GO:0071260: cellular response to mechanical stimulus	10	0.852515	0.0223741	GJA1, CD40, ITGA2, CASP1, FAS, TNFRSF10B, ATP1A2, PTGS2, EGFR, TLR3
GO:0043536: positive regulation of blood vessel endothelial cell migration	5	0.426257	0.0224162	ANGPT1, HSPB1, PRKCA, AMOTL1, VEGFA
GO:0006883: cellular sodium ion homeostasis	5	0.426257	0.0224162	ATP1B3, ATP1A2, ATP1B2, ATP1B1, SLC8A1
GO:0010975: regulation of neuron projection development	5	0.426257	0.0224162	DPYSL3, NCS1, PTEN, GATA3, NDEL1
GO:0043393: regulation of protein binding	5	0.426257	0.0224162	TGFBR3, SMARCD3, ANGPT1, PSEN1, TGFBR1
GO:0000187: activation of MAPK activity	13	1.10827	0.0226503	TGFB3, NTRK3, LPAR1, NRG1, IGF1, DUSP6, BMP2, KIT, CSPG4, PAK3, MUC20, PROK1, AVPI1
GO:0006915: apoptotic process	46	3.92157	0.0229883	STEAP3, CLIC4, BEX2, CITED1, ZFAND6, JADE1, PTEN, HIF3A, EFNA5, NR3C1, NTN1, ADRA1A, PAK1, GJA1, BCL2L11, MECOM, PLAGL1, PEG10, CASP1, TNS4, PHLDA1, TP63, ATG5, IER3, EPHA7, PRKCB, UNC5B, RHBDD1, TNFRSF10B, SERPINB9, UNC5D, TMEM173, TGFBR1, RHOB, ACTC1, STK17A, DLC1, BCL2, LCN2, MAL, FAS, TNFRSF25, XAF1, FGFR2, PPARD, BNIPL
GO:0007156: homophilic cell adhesion via plasma membrane adhesion molecules	17	1.44928	0.0231002	PCDH9, CLSTN2, PCDH10, PCDH7, CELSR1, CELSR2, PCDH18, ROBO1, CEACAM1, CDH3, ME1, CDH23, FAT4, CDH26, DSC3, NECTIN1, MPZL2
GO:0001886: endothelial cell morphogenesis	4	0.341006	0.0232236	CLIC4, ID1, STC1, MET
GO:0050927: positive regulation of positive chemotaxis	4	0.341006	0.0232236	NTRK3, ITGA2, KDR, VEGFA
GO:0007417: central nervous system development	14	1.19352	0.0234993	COX7B, GSTP1, PTEN, ATN1, CELSR1, ALDH3A2, RCAN1, PCP4, ADGRA2, B3GNT5, DNER, PDGFC, MAL, TIMP4
GO:0042127: regulation of cell proliferation	19	1.61978	0.0239956	JAG2, CD40, ANXA1, RBFOX2, TFRC, TGFB3, PTGER2, TNC, TNFRSF10B, HOXD13, PTGS1, PURA, NUAK1, CHST11, TRNP1, KIT, FAS, SCGB3A1, TNFRSF25
GO:0007015: actin filament organization	10	0.852515	0.0242896	FHOD3, TPM4, TPM2, TPM1, BCL2, LMOD1, SORBS2, EMP2, SORBS1, SHROOM4
GO:0051897: positive regulation of protein kinase B signaling	11	0.937766	0.0247078	TCF7L2, C1QTNF1, IGFBP5, ANGPT1, FAM110C, GCNT2, SPRY2, NRG1, GATA3, EGFR, TGFBR1
GO:0032570: response to progesterone	7	0.59676	0.0248017	TGFB2, TGFB3, PTGER2, CAV1, CD38, CCL2, PTN
GO:0030890: positive regulation of B cell proliferation	7	0.59676	0.0248017	VAV3, CD40, TFRC, BCL2, PELI1, CD38, IRS2
GO:0030308: negative regulation of cell growth	14	1.19352	0.0249707	TSPYL2, TGFB2, NDRG3, FHL1, JADE1, WFDC1, DCBLD2, BST2, GJA1, BCL2, SCGB3A1, SLIT2, CRYAB, PPARD
GO:0007204: positive regulation of cytosolic calcium ion concentration	15	1.27877	0.0254363	GIPR, PTGER2, PTGER3, LPAR1, CIB2, ADRA1A, ADCY5, GJA1, C1QTNF1, EDNRB, TBXA2R, DLG4, P2RY1, CD38, S1PR3
GO:0050900: leukocyte migration	14	1.19352	0.0265091	ANGPT1, CAV1, ATP1B3, ATP1B2, PIK3R1, ATP1B1, SELE, CEACAM1, SLC7A8, PDE4B, CD47, CD44, CD177, JAM3
GO:0071385: cellular response to glucocorticoid stimulus	5	0.426257	0.0267538	ANXA1, HEY1, GSTP1, STC1, ZFP36L2
GO:0014911: positive regulation of smooth muscle cell migration	5	0.426257	0.0267538	CAMK2D, ITGA2, SEMA6D, BCL2, IGF1
GO:0030318: melanocyte differentiation	5	0.426257	0.0267538	EDNRB, CITED1, EDN3, KIT, BCL2
GO:0046697: decidualization	5	0.426257	0.0267538	PTGIS, STC1, PTGS2, CTSB, PPARD
GO:0006979: response to oxidative stress	13	1.10827	0.0274484	SCARA3, GPX2, RBPMS, GPX3, PSIP1, PSEN1, PTGS2, EGFR, PTGS1, PDLIM1, ALAD, DUOX1, MSRB3
GO:0007346: regulation of mitotic cell cycle	7	0.59676	0.0277807	CDK9, CDKN1C, CYLD, AFAP1L2, SIK1, RNF40, RPRM
GO:0070374: positive regulation of ERK1 and ERK2 cascade	18	1.53453	0.028073	CAMK2D, ANGPT1, PTEN, PRKCA, ADRA1A, EGFR, VEGFA, BMP2, CYSLTR2, RAP1A, PDGFC, P2RY1, KDR, GCNT2, CCL2, SPRY2, CD44, FGFR2
GO:0046326: positive regulation of glucose import	6	0.511509	0.0287342	RAP1A, IRS1, IRS2, SORBS1, IGF1, PIK3R1
GO:0055072: iron ion homeostasis	6	0.511509	0.0287342	STEAP3, TF, BDH2, EPAS1, SFXN3, B2M
GO:0007171: activation of transmembrane receptor protein tyrosine kinase activity	4	0.341006	0.0296417	ANGPT1, PDGFC, NRG1, EFNA5
GO:0045717: negative regulation of fatty acid biosynthetic process	4	0.341006	0.0296417	CEACAM1, ACADL, INSIG1, ERLIN2
GO:0060997: dendritic spine morphogenesis	4	0.341006	0.0296417	DLG4, PTEN, PAK3, EPHB1
GO:0035641: locomotory exploration behavior	4	0.341006	0.0296417	DPP4, DLG4, PENK, LSAMP
GO:0043616: keratinocyte proliferation	4	0.341006	0.0296417	FERMT1, IRF6, TP63, PPARD
GO:0097067: cellular response to thyroid hormone stimulus	4	0.341006	0.0296417	LMO2, KIT, PPARGC1A, CTSB
GO:0035385: Roundabout signaling pathway	4	0.341006	0.0296417	ROBO3, OGN, SLIT2, ROBO1
GO:0001501: skeletal system development	15	1.27877	0.0300459	JAG2, CDKN1C, KLF10, TGFB2, HOXD13, IGF1, ETS2, TGFBR1, TBX3, BMP2, EBP, ANKH, TRPS1, SH3PXD2B, TP63
GO:0090131: mesenchyme migration	3	0.255754	0.0304662	ACTC1, FOXF1, ACTG2
GO:0001780: neutrophil homeostasis	3	0.255754	0.0304662	ANXA1, PDE4B, JAM3
GO:0070836: caveola assembly	3	0.255754	0.0304662	CAV2, CAV1, EMP2
GO:0042415: norepinephrine metabolic process	3	0.255754	0.0304662	EPAS1, RNF180, AKR1B1
GO:0033591: response to L-ascorbic acid	3	0.255754	0.0304662	GSTP1, ITGA2, CAT
GO:0038033: positive regulation of endothelial cell chemotaxis by VEGF-activated vascular endothelial growth factor receptor signaling pathway	3	0.255754	0.0304662	KDR, HSPB1, VEGFA
GO:0045636: positive regulation of melanocyte differentiation	3	0.255754	0.0304662	KITLG, ZEB2, BCL2
GO:0070100: negative regulation of chemokine-mediated signaling pathway	3	0.255754	0.0304662	PADI2, SLIT2, ROBO1
GO:0006706: steroid catabolic process	3	0.255754	0.0304662	STS, SRD5A2, CYP3A4
GO:0032354: response to follicle-stimulating hormone	3	0.255754	0.0304662	TGFBR3, SRD5A2, PAPPA
GO:0048839: inner ear development	7	0.59676	0.0309864	TGFB2, BMP2, MAF, TGFB3, EYA4, CYTL1, DLL1
GO:0042472: inner ear morphogenesis	8	0.682012	0.031093	PRRX1, INSIG1, SPRY2, GATA3, ROR2, CELSR1, NTN1, FGFR2
GO:0032496: response to lipopolysaccharide	17	1.44928	0.0313227	CD40, CITED1, KCNJ8, PTGER2, TNFRSF10B, PTGS2, SELE, ALAD, TRIM6, DUSP10, PENK, SCGB1A1, CASP1, PELI1, FAS, TNFRSF25, TIMP4
GO:0045987: positive regulation of smooth muscle contraction	5	0.426257	0.0315588	MYOCD, TBXA2R, ITGA2, PTGS2, ADRA1A
GO:0032781: positive regulation of ATPase activity	6	0.511509	0.0326616	DNAJC7, TPM1, RGN, ATP1B3, ATP1B2, ATP1B1
GO:0071222: cellular response to lipopolysaccharide	13	1.10827	0.0329451	CEBPB, CD40, GSTP1, PDE4D, DAB2IP, EDNRB, TBXA2R, PDE4B, LCN2, CCL2, PPARGC1A, B2M, PPARD
GO:0022617: extracellular matrix disassembly	10	0.852515	0.0331193	ADAMTS5, LAMB3, CAPNS2, SH3PXD2B, LAMA3, MMP19, CAPG, PLG, NID1, CD44
GO:0060021: palate development	10	0.852515	0.0331193	TGFBR3, TGFB2, PRRX1, BNC2, TGFB3, INSIG1, PAK1IP1, SNAI2, TGFBR1, TBX3
GO:0051496: positive regulation of stress fiber assembly	7	0.59676	0.0344242	PAK1, RGCC, SDC4, TGFB3, TPM1, LPAR1, TGFBR1
GO:0007566: embryo implantation	7	0.59676	0.0344242	PTGIS, SCGB1A1, STC1, FBLN1, EMP2, PTGS2, PPARD
GO:0060348: bone development	7	0.59676	0.0344242	SRD5A2, NPR2, PDGFC, SH3PXD2B, BBX, STC1, FGFR2
GO:0007517: muscle organ development	11	0.937766	0.035134	MKL2, SGCE, TAGLN, SMTN, SGCD, SGCB, FHL1, ITGA7, IGF1, CRYAB, SGCG
GO:0051384: response to glucocorticoid	9	0.767263	0.0354174	ALAD, PAPPA, SCGB1A1, BCL2, FAS, SDC1, ACSBG1, PTGDS, PTGS2
GO:0010906: regulation of glucose metabolic process	5	0.426257	0.0368369	C1QTNF1, IGFBP5, PDK4, PDK3, RORA
GO:0055074: calcium ion homeostasis	5	0.426257	0.0368369	JPH2, CAV1, CIB2, FAM20A, SLC8A1
GO:0010248: establishment or maintenance of transmembrane electrochemical gradient	4	0.341006	0.0368931	ATP1B3, ATP1A2, ATP1B2, ATP1B1
GO:0086012: membrane depolarization during cardiac muscle cell action potential	4	0.341006	0.0368931	CACNA2D1, ATP1A2, SCN4B, SLC8A1
GO:0045019: negative regulation of nitric oxide biosynthetic process	4	0.341006	0.0368931	PTGIS, CAV1, RGN, ATP2B4
GO:0060389: pathway-restricted SMAD protein phosphorylation	4	0.341006	0.0368931	TGFBR3, TGFB2, BMP2, TGFBR1
GO:0050873: brown fat cell differentiation	6	0.511509	0.0369075	CEBPB, LAMB3, RARRES2, ZNF516, PTGS2, PPARGC1A
GO:0003007: heart morphogenesis	6	0.511509	0.0369075	TGFBR3, TGFB2, ALDH1A2, DLC1, FAT4, VEGFA
GO:0045766: positive regulation of angiogenesis	13	1.10827	0.0370206	CCBE1, PTGIS, FLT1, PRKCB, HSPB1, PRKCA, RHOB, VEGFA, CYSLTR2, RRAS, TBXA2R, KDR, ANGPTL4
GO:0030168: platelet activation	13	1.10827	0.0370206	VAV3, DGKE, CD40, PRKCB, DGKA, ITPR1, PRKCA, PIK3R1, RHOB, P2RY1, PDPN, CD9, FLNA
GO:0070555: response to interleukin-1	6	0.511509	0.0414765	ANXA1, CITED1, IL1R1, CD38, PRKCA, SELE
GO:0002088: lens development in camera-type eye	6	0.511509	0.0414765	GJA1, NHS, SLITRK6, GATA3, CRYAB, TGFBR1
GO:0071364: cellular response to epidermal growth factor stimulus	6	0.511509	0.0414765	GSTP1, ID1, DAB2IP, SNAI2, EGFR, ZFP36L2
GO:0002027: regulation of heart rate	6	0.511509	0.0414765	POPDC2, EPAS1, PDE4D, GPD1L, CALM1, SLC8A1
GO:0010718: positive regulation of epithelial to mesenchymal transition	6	0.511509	0.0414765	TGFB2, BMP2, RGCC, TGFB3, GCNT2, TGFBR1
GO:0043434: response to peptide hormone	7	0.59676	0.042014	GJA1, CXCL12, ANXA1, SRD5A2, IRS1, RNF40, TIMP4
GO:0090398: cellular senescence	5	0.426257	0.0425914	C2ORF40, ID2, KAT6A, SMC5, TBX3
GO:0009617: response to bacterium	5	0.426257	0.0425914	CAV1, CCL2, SERPINB9, DEFB1, CD47
GO:0048754: branching morphogenesis of an epithelial tube	5	0.426257	0.0425914	PAK1, CLIC4, SLIT2, MET, VEGFA
GO:0014003: oligodendrocyte development	5	0.426257	0.0425914	PRDM8, GSTP1, ID2, LPAR1, CD9
GO:0007179: transforming growth factor beta receptor signaling pathway	11	0.937766	0.0426826	TGFBR3, KLF10, TGFB2, CITED1, TGFB3, ID1, GCNT2, CCL2, SKIL, FERMT2, TGFBR1
GO:0055114: oxidation-reduction process	46	3.92157	0.0427554	STEAP3, GMPR, AKR1B1, MSMO1, CYP3A4, PTGS2, ALDH1L2, PTGS1, HSD11B1, CYB5R2, FADS2, DUOX1, CYP4X1, ACADL, AIFM2, SH3PXD2B, ME1, AOX1, PHGDH, AOC3, AOC1, GPX2, PTGIS, GSTO2, SRD5A2, GPX3, CYP4F2, ADHFE1, TXNL1, SCD5, P3H2, SORD, CYP4B1, KCNAB1, FAM213A, SOD3, RPE65, ALDH3A2, CYP27A1, BMP2, TMLHE, ASPH, ALDH1A2, HHIPL2, MSRB3, GPD1L
GO:1901018: positive regulation of potassium ion transmembrane transporter activity	3	0.255754	0.0439445	ATP1B3, ATP1B2, ATP1B1
GO:2000271: positive regulation of fibroblast apoptotic process	3	0.255754	0.0439445	BCL2L11, STK17A, TP63
GO:0010649: regulation of cell communication by electrical coupling	3	0.255754	0.0439445	CAMK2D, ASPH, SLC8A1
GO:0061299: retina vasculature morphogenesis in camera-type eye	3	0.255754	0.0439445	CLIC4, RHOJ, NDP
GO:0002933: lipid hydroxylation	3	0.255754	0.0439445	CYP3A7-CYP3A51P, CYP3A4, CYP3A5
GO:0003158: endothelium development	3	0.255754	0.0439445	GJA1, SLC40A1, KDR
GO:0014037: Schwann cell differentiation	3	0.255754	0.0439445	GPC1, NAB1, ADGRG6
GO:0051150: regulation of smooth muscle cell differentiation	3	0.255754	0.0439445	MYOCD, FOXF1, FGFR2
GO:0038084: vascular endothelial growth factor signaling pathway	3	0.255754	0.0439445	NRP2, FLT1, VEGFA
GO:0001570: vasculogenesis	8	0.682012	0.0441723	NTRK2, MYOCD, CITED1, FOXF1, CAV1, KDR, QKI, VEGFA
GO:0060065: uterus development	4	0.341006	0.0449619	CDKN1C, MYOCD, TGFB2, GATA3
GO:0060402: calcium ion transport into cytosol	4	0.341006	0.0449619	JPH2, CACNA2D1, ADRA1A, SLC8A1
GO:0071354: cellular response to interleukin-6	4	0.341006	0.0449619	PTGIS, CCL2, ST3GAL6, PPARGC1A
GO:0001516: prostaglandin biosynthetic process	4	0.341006	0.0449619	PTGIS, PTGDS, PTGS2, PTGS1
GO:0060347: heart trabecula formation	4	0.341006	0.0449619	TGFBR3, HEY1, ADAMTS1, FHL2
GO:0030514: negative regulation of BMP signaling pathway	7	0.59676	0.0461733	FZD1, CAV1, RBPMS2, SKIL, NBL1, CHRDL1, SPG20
GO:0048286: lung alveolus development	6	0.511509	0.046372	MYOCD, IGFBP5, TGFB3, FOXF1, PDPN, FGFR2
GO:0050919: negative chemotaxis	6	0.511509	0.046372	NRP2, EPHA7, FLRT3, SEMA6D, SLIT2, EFNA5
GO:0032922: circadian regulation of gene expression	8	0.682012	0.0479201	PER2, ID2, NAMPT, BHLHE40, CREM, RORA, CARTPT, PPARGC1A

## Sheet: Sheet2
Supplementary file S9: Significant downregulated differentially expressed genes involved in GO Cellular Component
Term	Count	Percent(%)	PValue	Genes
GO:0005925: focal adhesion	60	5.11509	4.77456e-12	FLT1, FHL1, TNC, DIXDC1, FHL2, HSPB1, RND3, SYNE2, AKAP12, GJA1, CSRP2, CSRP1, PGM5, TNS4, B2M, TNS1, TLE2, ANXA1, TPM4, DST, MME, ITGA2, RHOB, ENAH, PALLD, CAT, AJUBA, CD44, VCL, SDC4, SYNPO2, ASAP3, NEDD9, LPP, EGFR, ARHGAP22, DPP4, PDLIM1, CNN1, PAK1, RRAS, FLRT3, NHS, FLNA, FLNC, FZD1, SVIL, ZNF185, CAV2, CAV1, SORBS2, SORBS1, FERMT1, ACTC1, DLC1, TRIP6, CD9, SDC1, CSPG4, FERMT2
GO:0005886: plasma membrane	319	27.1952	2.34246e-10	IFITM3, TFRC, C2ORF88, ANTXR2, ZDHHC2, AQP3, GLDN, LGALS3, GJA1, EDNRB, STS, CAPNS2, ADGRA2, KDR, VSTM4, B2M, EPHB1, PRIMA1, TSPYL2, PAQR8, EPHA5, EPHA7, PAQR7, UNC5B, ACSL1, PRKCB, IL1R1, CACNA2D1, COL23A1, SLC6A13, PRKCA, UNC5D, KRT5, SYTL4, HLA-E, AZGP1, FNDC4, MAP1B, FEZ1, MALL, ANOS1, KCNQ5, PLPP3, CFB, LRPAP1, ADCYAP1R1, SDC4, COL13A1, GIPR, PCDH10, SDC2, LPAR1, PIK3R1, PCDH18, RRAS, ANKH, …
GO:0005901: caveola	20	1.70503	1.76817e-09	ADCYAP1R1, PTGIS, IRS1, CAV2, CAV1, MYOF, ATP2B4, ATP1B3, ATP1A2, EMP2, ATP1B1, PTGS2, EFNA5, SELE, EHD2, SPRED1, SDPR, DLC1, KCNMA1, PTRF
GO:0009986: cell surface	67	5.71185	3.27493e-09	SRPX, CPM, CD40, CLIC4, CLSTN2, TFRC, ITGB4, CLU, ROBO1, ADGRA2, LIPG, CD38, ITGB8, IL6R, TNS1, ANXA1, CD93, ANXA2, IL1R1, ITGA2, EMP2, UNC5D, TGFBR1, HLA-E, TGFBR3, GPRC5B, CEACAM1, ITGA7, CRYAB, MET, TLR3, CD44, LRPAP1, ADCYAP1R1, SDC4, NRXN1, SDC2, LPAR1, LRP4, PLG, PTN, PSEN1, EGFR, DPP4, SCUBE3, P2RY1, PDGFC, SLITRK6, SLIT2, NDP, PROM1, LDLR, FZD1, AOC3, TGFB3, TNFRSF10B, DEFB132, DCBLD2, VE…
GO:0005615: extracellular space	125	10.6564	3.59142e-08	SPON1, TFRC, TNC, DEFB1, CLU, GLDN, ACTG2, LGALS3, EFEMP1, ANPEP, DPYSL3, NAMPT, LIPG, ENPP2, PTGDS, B2M, IL6R, CCBE1, TLE2, SERPINF1, CARTPT, OLFM4, MUC3A, MUC3B, DKK3, AZGP1, PAPPA, ANOS1, S100A4, NBL1, CFB, CES1, CFD, CFH, DPT, STC1, FBLN1, TTBK2, FLRT3, CPAMD8, PDGFC, CYTL1, SFN, NDP, PROM1, CPA6, TGFB2, TSLP, TGFB3, IGF1, SELE, TF, BMP2, CXCL12, OGN, LCN2, SCGB3A1, LGALS3BP, CPM, CD40, FLT1,…
GO:0030018: Z disc	25	2.13129	3.79309e-08	FHOD3, SYNPO2, FHL2, HSPB1, LDB3, ADRA1A, SLC8A1, SYNE2, PAK1, JPH2, PDE4B, FLNA, PGM5, FLNC, DST, AHNAK2, ATP2B4, SORBS2, FBXO32, KRT19, DES, PALLD, MYZAP, CRYAB, MYL9
GO:0042383: sarcolemma	21	1.79028	3.99048e-08	POPDC2, SYNM, ANXA1, DTNA, ANXA2, KCNJ8, AHNAK2, CIB2, ATP1B1, SLC2A5, SLC8A1, SGCE, KRT19, DES, SGCD, SGCB, SLMAP, COL6A1, PGM5, FLNC, SGCG
GO:0045121: membrane raft	33	2.8133	1.91802e-07	SDC4, PSEN1, DLL1, EGFR, DPP4, GJA1, ADGRG1, EDNRB, GPC1, KDR, STOM, PTRF, EPHB1, GPM6B, ANGPT1, ANXA2, CAV2, UNC5B, CAV1, EMP2, SORBS1, ERLIN2, SELE, TGFBR1, CLIP3, BST2, GPRC5B, SDPR, MALL, CNTN1, MAL, FAS, VCL
GO:0005604: basement membrane	19	1.61978	3.18128e-07	COL17A1, ANXA2, DST, SERPINF1, LAMA3, LAMB4, TNC, NTN4, P3H2, FBLN1, PTN, NID1, EFNA5, NTN1, ADAMTS1, COL7A1, SMOC1, TIMP3, ANXA2P2
GO:0005578: proteinaceous extracellular matrix	37	3.15431	1.29066e-06	VIT, COL17A1, LGALS3BP, SPON1, DPT, NDNF, FBLN1, OLFML2A, GLDN, COCH, IL1RL1, ADAMTS5, EFEMP1, FLRT3, ADAMTS1, GPC1, SPOCK3, TIMP3, SLIT2, CPA6, GPC6, MUC4, TIMP4, SBSPON, CCBE1, MAMDC2, VEGFA, TGFBR3, CRISPLD2, SMOC1, OGN, COL4A6, COL9A1, ANOS1, COL4A5, MMP19, ANGPTL4
GO:0070062: extracellular exosome	213	18.1586	3.6449e-06	IFITM3, TFRC, MYLK, LGALS3, GJA1, ANPEP, NAMPT, PTGDS, B2M, EPHB1, PRKCB, SERPINF1, CACNA2D1, SLC6A13, KRT7, ACSL4, RNASE4, PRKCA, KRT5, HLA-E, SULT2B1, EML5, AZGP1, CRISPLD2, PADI2, ZNF711, PLPP3, CFB, CFD, LXN, CFH, KLK1, SDC4, MGST3, SEC14L2, RRAS, S100A16, PDGFC, ST3GAL6, SFN, PROM1, GSTM3, GSTM2, GREB1, ERLIN2, BST2, EHD2, TF, SDC1, FAT4, CALM1, CLIC6, CLIC4, CD40, DPYS, QPRT, ADIRF, AKR1B1,…
GO:0016324: apical plasma membrane	37	3.15431	8.7482e-06	PTEN, STC1, SLC2A5, DLL1, EGFR, DPP4, DUOX1, GJA1, UPK1A, P2RY1, NHS, PROM1, IL6R, CLCA4, MFSD4B, ANXA1, CYP4F2, PDE4D, CAV1, NRG1, SORBS2, EMP2, ATP1B2, ATP1B1, MUC3A, SHROOM4, MUC3B, BST2, TF, CEACAM1, KCNMA1, MAL, CD9, SLC29A4, CSPG4, AMOTL1, MUC20
GO:0043034: costamere	8	0.682012	5.05009e-05	SVIL, SYNM, KRT19, SDC4, AHNAK2, PGM5, FLNC, VCL
GO:0005887: integral component of plasma membrane	115	9.80392	6.96389e-05	STEAP3, CHRM1, TFRC, CELSR1, ZDHHC2, AQP3, SLC8A1, FADS2, GJA1, CYSLTR2, EDNRB, VSIG2, ANPEP, ENPP2, KDR, SLC39A2, SLC16A2, EPHB1, SLC16A5, EPHA5, SLC15A1, EPHA7, IL1R1, SEMA6D, SLC6A13, SLCO2A1, MAL, ROR2, PLPP3, COL17A1, ADCYAP1R1, SDC4, NPR2, GPR87, LPAR1, PSEN1, APCDD1, ADGRG1, EBP, ANKH, TBXA2R, FLRT3, CLCA2, ST3GAL5, TSPAN2, PROM1, CLCA4, JAG2, SLC14A1, CAV2, CAV1, TNFRSF10B, SLC4A11, BST2,…
GO:0005576: extracellular region	124	10.5712	0.000334004	TFRC, TNC, DEFB1, ANTXR2, CLU, EFEMP1, LIPG, KDR, PTGDS, VSTM4, B2M, IL6R, EPHB1, PROK1, COL27A1, IGFBP5, IL1R1, SERPINF1, FST, RNASE4, MR1, MUC3A, TUBA4A, DKK3, AZGP1, EMCN, CRISPLD2, PAPPA, COL4A6, ANOS1, HHIPL2, COL4A5, CFB, VCL, DSC3, COL17A1, CFD, LRPAP1, CFH, COL13A1, IGSF1, FBLN1, EFNA5, NID1, SPATA6, ABO, SCUBE2, SCUBE3, PLAC9, CPAMD8, PENK, PDGFC, CLCA2, TGFB2, TGFB3, RARRES2, IGF1, TF, …
GO:0031012: extracellular matrix	33	2.8133	0.000346921	LGALS3BP, CSTA, SPON1, TNC, DPT, HSPB1, NDNF, FBLN1, NID1, CLU, THSD4, COCH, LGALS3, EFEMP1, SPOCK3, FLNA, TIMP3, NDP, TGM4, LMCD1, SBSPON, TGFB2, CD93, ANXA2, TGFB3, RARRES2, SERPINF1, SOD3, COL7A1, COL6A1, OGN, MMP19, FGFR2
GO:0005856: cytoskeleton	38	3.23956	0.000604487	FHOD3, PLEKHH2, HSPB1, LDB3, ADD3, SGCE, PDLIM1, AKAP12, CNN1, EPB41L4A, SGCD, CALD1, BASP1, SGCB, STOM, SYMPK, PLEK2, FLNC, TNS4, NINL, SGCG, MPZL2, TNS1, TPM4, DST, TPM1, PTPN14, ENAH, KITLG, FRMD5, SMTN, FRMD6, DNAJC7, RNF128, TRIP6, SPRY2, FERMT2, VCL
GO:0005737: cytoplasm	343	29.2413	0.000675926	PANK2, LPGAT1, ZAK, DIXDC1, AQP3, MYLK, LGALS3, HERC1, TRIM29, CAPNS2, SOX15, PEG10, FAM110C, DPYSL3, NAMPT, RAVER2, BBX, TNS4, B2M, SOX7, TP63, PKNOX2, TNS1, TSPYL2, MBNL2, RBFOX2, RBFOX3, PRKCB, KRT7, ACSL4, PRKCA, KRT5, SYTL4, SULT2B1, RBP7, EML5, EID3, SDPR, MAP1B, FEZ1, MAP1A, RBP1, ARMC4, MT1G, PADI2, SIK1, MEG3, BEX2, BEX1, LXN, ZNF394, EPAS1, LPAR1, STC1, PHYHIPL, PIK3R1, SEC14L2, NUAK1, …
GO:0030315: T-tubule	9	0.767263	0.00109958	CAMK2D, STAC, TGFB3, AHNAK2, ATP2B4, ATP1A2, ADRA1A, SLC8A1, KCNJ3
GO:0009925: basal plasma membrane	8	0.682012	0.00118045	CEACAM1, TF, DST, CLCA2, MET, MUC20, SHROOM4, ITGA9
GO:0031941: filamentous actin	8	0.682012	0.00145117	FERMT1, PAK1, TPM4, TPM1, DPYSL3, FLNA, FERMT2, SHROOM4
GO:0005794: Golgi apparatus	71	6.05286	0.00154865	ST6GALNAC2, MAML2, HSPB8, ZDHHC2, CLU, FTCD, SGCE, SART1, GJA1, STS, DUSP10, GNPTAB, MECOM, HERC1, LIPG, DSE, NCS1, KDR, PTGDS, LARGE1, TGM4, B2M, PRKG1, GABARAPL1, PAQR3, P3H2, EMP2, TMEM173, MDFIC, RNF128, ELF4, FEZ1, KAT6A, CAT, FAM20A, PLPP3, CRYAB, CD44, LRPAP1, PARM1, PDXDC1, GOSR1, GLIS3, NEDD9, PSEN1, NDRG2, ABO, TMEM165, CLN5, PTGS1, GGA2, PAK1, PERP, PLAGL1, ST3GAL5, ST3GAL6, RAB6A, LDL…
GO:0005912: adherens junction	10	0.852515	0.00177306	TMEM47, EPHA5, SYNM, CEACAM1, PLPP3, EFNA5, DLL1, AJUBA, VCL, NECTIN1
GO:0016012: sarcoglycan complex	4	0.341006	0.0031822	SGCE, SGCD, SGCB, SGCG
GO:0014704: intercalated disc	9	0.767263	0.00341461	CAMK2D, PAK1, GJA1, DES, PGM5, ATP1A2, ATP1B1, SCN4B, SLC8A1
GO:0031258: lamellipodium membrane	6	0.511509	0.00344298	DPP4, PDPN, PLEK2, CSPG4, FERMT2, SYNE2
GO:0031594: neuromuscular junction	10	0.852515	0.00349543	CAMK2D, SYNGR1, EPHA7, DES, CIB2, LRP4, COL4A5, NRG1, PTN, PSEN1
GO:0005768: endosome	24	2.04604	0.00450536	LRPAP1, NTRK2, TGFB2, ADCYAP1R1, ANXA1, FLT1, ANXA2, TFRC, CAV1, LPAR1, ATP1A2, NSG1, SYTL4, EGFR, TGFBR1, ZNRF1, STS, GPC1, KDR, MAL, PAK3, SNX7, LDLR, EXPH5
GO:0071944: cell periphery	8	0.682012	0.00572485	KRT19, SCARA3, KRT17, ODAM, KRT14, PDE4B, NID1, ACTG2
GO:0031982: vesicle	16	1.36402	0.00588348	LRPAP1, ANXA1, ANXA2, NRXN1, GSTP1, ANO5, ABO, TF, PLN, BASP1, LAMP3, STOM, CALM1, PROM1, LGR6, MUC4
GO:0005829: cytosol	219	18.6701	0.00731819	PANK2, WIPF3, DIXDC1, CCP110, MYLK, GJA1, HERC1, PSMD5, CAPNS2, ANPEP, DPYSL3, NAMPT, EPHB1, TP63, IER3, GABARAPL1, WSB1, PRKCB, PRKCA, KRT5, SULT2B1, PPP1R3C, SDPR, MAP1B, RBP1, PADI2, MYL9, CES1, EPAS1, PIK3R1, TTBK2, S100A16, PDGFC, PIP5K1B, SFN, HMGCLL1, ATG5, GSTM4, GSTM3, GSTM2, GSTM1, APOBEC3G, STAC, CYLD, EHD2, FERMT1, ID2, CALM1, FERMT2, GSTM5, CEP89, CLIC4, CITED1, DPYS, QPRT, AKR1B1, H…
GO:0031410: cytoplasmic vesicle	24	2.04604	0.00756925	STARD4, DST, TFRC, CAV2, CAV1, MYOF, EMP2, PSEN1, DLL1, TF, EBP, MAP1LC3A, ADAMTS1, MALL, ANP32E, ACSBG1, ANG, AMOTL1, SLC39A2, RAB6A, ADGRL4, PHLDA1, FGFR2, TMEM35A
GO:0005796: Golgi lumen	13	1.10827	0.00790492	SDC4, SDC2, DEFB1, MUC3A, SOD3, MUC3B, GPC1, OGN, SDC1, CSPG4, GPC6, MUC4, MUC20
GO:0005911: cell-cell junction	19	1.61978	0.00883224	COL17A1, CLIC4, ANXA2, COL13A1, WDR1, PIK3R1, ADD3, AQP3, TMEM47, AFDN, PAK1, CEACAM1, FLRT3, CDC42EP4, KIT, FLNA, AJUBA, VCL, DSC3
GO:0031090: organelle membrane	12	1.02302	0.0098824	CYP3A7-CYP3A51P, CYP4X1, MAP1LC3A, SRD5A2, CYP4F2, MGST3, CYP4B1, CYP3A4, PTGS2, CYP3A5, RPE65, PTGS1
GO:0005884: actin filament	10	0.852515	0.0106354	ACTC1, TPM4, WDR1, PALLD, TPM2, TPM1, WIPF3, LMOD1, FLNA, FMN2
GO:0016010: dystrophin-associated glycoprotein complex	5	0.426257	0.0107602	SGCE, KRT19, SGCD, SGCB, PGM5
GO:0005882: intermediate filament	14	1.19352	0.0115139	KRT222, SYNM, DST, KRT13, KRT23, KRT7, KRT5, KRT19, GJA1, DES, KRT17, KRT15, KRT14, PKP1
GO:0048471: perinuclear region of cytoplasm	50	4.26257	0.0118788	CLIC4, TFRC, ATN1, AKR1B1, LDB3, FMN2, CLU, LAMP3, NCS1, PDE4A, PTGDS, CTSB, EPHA5, ANXA2, SERPINF1, ITGA2, MAGI2, PRKCA, OLFM4, TMEM173, RNF128, ALDH1A2, S100A6, MT1G, S100A4, CAMK2D, PTN, NDRG2, EGFR, CLN5, RAP1A, PLN, FLNA, CCL2, STOM, GBP2, HMGCLL1, GBP3, FUS, CAV2, CAV1, SORBS2, SELE, MEIS2, PER2, CYLD, NELL1, EHD2, TF, DAB1
GO:0005581: collagen trimer	12	1.02302	0.0147129	COL17A1, CCBE1, SCARA3, C1QTNF1, COL27A1, COL13A1, COL7A1, COL23A1, COL6A1, COL4A6, COL4A5, GLDN
GO:0019898: extrinsic component of membrane	11	0.937766	0.0171746	EHD2, EPB41L4A, FRMD5, BCL2L11, ANXA1, MAL, GFRA1, JAKMIP1, SNX7, SYTL4, RNF40
GO:0005862: muscle thin filament tropomyosin	3	0.255754	0.0178051	TPM4, TPM2, TPM1
GO:0005890: sodium:potassium-exchanging ATPase complex	4	0.341006	0.0212143	ATP1B3, ATP1A2, ATP1B2, ATP1B1
GO:0016023: cytoplasmic, membrane-bounded vesicle	15	1.27877	0.0246786	STARD4, CD93, DST, TFRC, TF, EBP, MALL, ANP32E, KDR, ACSBG1, ANG, SLC39A2, PHLDA1, FGFR2, TMEM35A
GO:0044297: cell body	9	0.767263	0.0251889	GNAZ, GABARAPL1, ACTC1, DPYSL3, P2RY1, RBP1, NRG1, ACTG2, RPE65
GO:0043220: Schmidt-Lanterman incisure	4	0.341006	0.0271166	ANXA2, PTEN, AKR1B1, JAM3
GO:0030054: cell junction	37	3.15431	0.0301135	CHRM1, ITGB4, NRXN1, C4ORF19, ATN1, SMC5, PSEN1, STON2, CPLX3, TMEM47, ZNRF1, SYNGR1, RAP1A, SV2B, BASP1, PERP, SH3PXD2B, NAMPT, NCS1, LRRTM2, KDR, CLCA2, DACT1, PRIMA1, DTNA, SHISA9, SYT9, ENAH, AFDN, FERMT1, CEACAM1, NFIA, DLG4, MAP1B, RGS12, MYZAP, AMOTL1
GO:0030139: endocytic vesicle	8	0.682012	0.0317976	DPP4, TF, NRXN1, DAB2IP, LPAR1, CCL2, EGFR, MTSS1
GO:0001725: stress fiber	8	0.682012	0.0317976	TPM4, TPM1, PGM5, SORBS1, MYL9, FERMT2, SHROOM4, MYLK
GO:0005811: lipid particle	9	0.767263	0.0322555	ANXA2, AIFM2, CAV1, LPCAT2, ACSL4, METTL7A, LDAH, LSS, SPG20
GO:0016020: membrane	145	12.3615	0.0327854	DGKE, CHRM1, LPGAT1, TFRC, DGKA, TNC, SLC8A1, LAPTM4B, LGALS3, FADS2, STS, CDH3, HERC1, VSIG2, DUOXA1, LAMP3, NIPAL3, B2M, IL6R, SLC16A5, SLC15A1, TPM4, ACSL1, LMAN1L, IL1R1, ACSL4, KRT5, ATP1B1, SYTL4, RNF40, HLA-E, SLCO2A1, PLPP3, DSC3, RASL12, ADCYAP1R1, MGST3, IGSF1, ITPR1, PSEN1, PIK3R1, EFNA5, ABO, DPP4, HSD11B1, CYB5R2, RAP1A, CHST11, RRAS, CDH23, PIP5K1B, RAB6A, PDZD8, HMGCLL1, FAM83B, AT…
GO:0030864: cortical actin cytoskeleton	7	0.59676	0.0330328	PLEKHH2, WDR1, DLC1, DSTN, MYZAP, SHROOM4, MED28
GO:0030027: lamellipodium	16	1.36402	0.0380502	PLEKHH2, NEDD9, SORBS2, MCC, ACTG2, MYLK, DPP4, ENAH, KITLG, ACTC1, PALLD, PDPN, DPYSL3, NHS, AMOTL1, AJUBA
GO:0015629: actin cytoskeleton	20	1.70503	0.0411732	SVIL, CLIC4, ZNF185, DST, SYNPO2, DENND2A, FHL2, DSTN, SORBS2, FMN2, SHROOM4, MTSS1, SMTN, CALD1, PALLD, CDC42EP4, FLNA, PDLIM5, VCL, PKNOX2
GO:0030057: desmosome	5	0.426257	0.043947	POF1B, PERP, PKP1, DSC3, JAM3
GO:0002102: podosome	5	0.426257	0.043947	SVIL, TPM4, WDR1, PALLD, SH3PXD2B
GO:0030424: axon	20	1.70503	0.0479517	EPHA5, NTNG2, ROBO3, TGFB2, NRP2, DTNA, MME, DST, DAB2IP, CCK, PSEN1, ROBO1, PAK1, PALLD, FEZ1, NCS1, CRYAB, NEFH, EPHB1, NECTIN1
GO:0070382: exocytic vesicle	4	0.341006	0.0494521	DPYSL3, IGF1, SYT9, SYTL4
GO:0043231: intracellular membrane-bounded organelle	42	3.58056	0.0515816	PON3, CD40, PARM1, PDXDC1, SAMD9, TFRC, IRS1, MGST3, C2ORF88, ATP1A2, CYP3A4, CYP3A5, PTGS1, TMEM165, APOL4, STS, MECOM, SNAPC1, PLAGL1, PPP6R2, NCS1, PROM1, LARGE1, SPTAN1, CTSB, SLC14A1, CYP4F2, SFMBT2, MYOF, ATP2B4, CDK9, ALDH3A2, SULT2B1, GPRC5B, DAB1, ACOX2, PPP1R3B, CAT, PKP1, FGFR2, ZNF750, NECTIN1
GO:0000139: Golgi membrane	44	3.75107	0.0549171	ST6GALNAC2, PARM1, CLSTN2, GOSR1, PSEN1, RND3, FTCD, EGFR, GJA1, CHST11, GNPTAB, PDGFC, DSE, GCNT2, CHST15, ST3GAL5, ST3GAL6, GBP2, RAB6A, LARGE1, GBP1, B2M, GBP3, CHST9, SCARA3, LMAN1L, ST8SIA1, CAV2, CAV1, PAQR3, COPZ2, EMP2, NSG1, HLA-E, WBSCR17, B3GNT8, COL7A1, B3GNT5, LPCAT2, MALL, B3GNT2, CHST2, TLR3, CHST3
GO:0043203: axon hillock	3	0.255754	0.0556308	SERPINF1, CCK, NDEL1
GO:0009897: external side of plasma membrane	19	1.61978	0.0586699	EPHA5, CD40, TFRC, ITGA2, NRG1, ANTXR2, TGFBR3, IL1RL1, CXCL12, EMCN, ANPEP, PDPN, KIT, CD9, FAS, SDC1, LDLR, B2M, KCNJ3
GO:1903561: extracellular vesicle	7	0.59676	0.0619682	TFRC, OGN, CD9, ATP1A2, ATP1B1, SPTAN1, VCL
GO:0008305: integrin complex	5	0.426257	0.0635937	ITGB4, ITGA2, ITGB8, ITGA7, ITGA9
GO:0005791: rough endoplasmic reticulum	7	0.59676	0.0670273	EPHA5, ADCYAP1R1, SCGB1A1, CCL2, PSEN1, PTGDS, TP63
GO:0031252: cell leading edge	6	0.511509	0.0674894	DST, ITGB4, LMO4, CDC42BPG, SSX2IP, NDEL1
GO:0030056: hemidesmosome	3	0.255754	0.0714482	COL17A1, DST, ITGB4
GO:0031232: extrinsic component of external side of plasma membrane	3	0.255754	0.0714482	TF, ANXA1, PLG
GO:1990712: HFE-transferrin receptor complex	3	0.255754	0.0714482	TF, TFRC, B2M
GO:0005789: endoplasmic reticulum membrane	60	5.11509	0.0743351	PGAP1, LPGAT1, CLSTN2, MSMO1, FMN2, ANTXR2, FADS2, GJA1, STS, DUOXA1, PTGDS, CYP3A7-CYP3A51P, SCARA3, PCYT1B, PTGIS, DST, ACSL1, LMAN1L, COPZ2, ACSL4, TMEM173, MR1, LSS, ANO5, ALDH3A2, ASPH, TLR3, HACD1, PPM1L, MGST3, INSIG1, ITPR1, PSEN1, CLN8, CYP3A4, PTGS2, CYP3A5, EGFR, AGPAT4, PTGS1, HSD11B1, CYB5R2, EBP, CYP4X1, FLRT3, RAB6A, HMGCLL1, OSBPL6, SRD5A2, RHBDD1, CYP4F2, CAV1, SCD5, CYP4B1, ERLI…
GO:0005788: endoplasmic reticulum lumen	17	1.44928	0.0787768	COL17A1, SPON1, COL27A1, COL13A1, COL23A1, P3H2, PTGS2, ADAMTS5, STS, COL7A1, PDGFC, COL6A1, COL4A6, COL9A1, COL4A5, B2M, CES1
GO:0016323: basolateral plasma membrane	16	1.36402	0.0866401	SLC14A1, ANXA1, ANXA2, TFRC, CAV1, ATP2B4, SLC40A1, SLC4A11, ATP1B1, AQP3, EGFR, SLC7A8, DLG4, P2RY1, LDLR, IL6R
GO:0031234: extrinsic component of cytoplasmic side of plasma membrane	8	0.682012	0.0892512	CYLD, DTNA, CAV2, DLG4, S100A6, KCNAB1, MYZAP, FERMT2
GO:0031093: platelet alpha granule lumen	7	0.59676	0.0895854	CFD, TGFB2, TGFB3, PLG, IGF1, CLU, VEGFA
GO:0005783: endoplasmic reticulum	57	4.85934	0.0938069	SRPX, PGAP1, MSMO1, ZDHHC2, CLU, FTCD, STS, UPK1A, DSE, KDR, PTRF, GABARAPL1, PTGIS, MAMDC2, P3H2, PRKCA, MR1, ZDHHC14, SULT2B1, CPED1, FNDC4, ASPH, RNF128, CAT, MAL, ACSBG1, FAM20A, LDAH, LRPAP1, GNAZ, HACD1, NRXN1, MGST3, INSIG1, ITPR1, PTN, PSEN1, CLN8, PTGS2, CLN5, EBP, PLN, STOM, METTL7A, PROM1, HMGCLL1, AOC3, RHBDD1, CAV1, ERLIN2, RPE65, DLG4, LPCAT2, OGN, BCL2, MSRB3, PLP2
GO:0043234: protein complex	31	2.6428	0.0952365	CAMK2D, NRXN1, NRXN3, ITPR1, CCP110, PSEN1, NR3C1, PTGS2, CLU, PAK1, PLN, PTRF, SKIL, TP63, BORCS5, ANXA1, DTNA, CAV2, CAV1, MAGI2, ATP2B4, ERLIN2, RNF40, MLLT10, NASP, ID2, COL6A1, SPATS2L, SDC1, SSX2IP, VCL
GO:0014069: postsynaptic density	16	1.36402	0.0996921	NTRK2, CHRM1, CLSTN2, MAGI2, ITPR1, LRP4, ADD3, DAB1, DLG4, MAP1B, P2RY1, NCS1, PDE4B, PDLIM5, CRYAB, NEFH

## Sheet: Sheet3
Supplementary file S10: Significant downregulated differentially expressed genes involved in GO Molecular Function
Term	Count	Percent (%)	P-Value	Genes
GO:0005509: calcium ion binding	74	6.30861	2.38125e-06	CLSTN2, DGKA, CIB4, CIB2, CELSR1, EFCAB7, CELSR2, SLC8A1, EFEMP1, CDH3, GNPTAB, CAPNS2, EFCAB1, DNER, NCS1, ENPP2, ME1, EFHD1, SPTAN1, NINL, CCBE1, ANXA1, S100A2, TPM4, CD93, DST, ANXA2, SYTL4, VSNL1, ASPH, S100A6, RGN, MMP19, PADI2, S100A4, MYL9, DSC3, SLC24A3, PCDH10, NRXN1, ITPR1, LRP4, FBLN1, NID1, DLL1, PCDH18, NKD1, SCUBE2, PRRG4, DUOX1, SCUBE3, S100A16, SPOCK3, CDH23, SLIT2, CDH26, LDLR, J…
GO:0042803: protein homodimerization activity	69	5.88235	8.97143e-05	HSPB6, CITED1, TFRC, PRDM6, QPRT, CIB2, OLFML2A, UPK1A, MECOM, NAMPT, RBPMS2, IL6R, ZHX2, ANXA1, DST, OLFM4, TMEM173, RNF40, CEACAM1, CAT, KIT, S100A6, ANG, CRYAB, NBL1, ATF3, PRTFDC1, ABCG2, PON3, CEBPB, CAMK2D, LRP4, PTGS2, DPP4, S100A16, FLRT3, PDGFC, FLNA, STOM, SLIT2, NDP, JAM3, GSTM4, AOC3, GSTM3, NTRK2, GSTM2, TGFB2, AOC1, GSTM1, RBPMS, APOBEC3G, BCL11A, CAV2, DAB2IP, SYT16, DLK2, VEGFA, B…
GO:0004364: glutathione transferase activity	10	0.852515	0.000136575	GSTM4, CLIC6, GSTM3, GSTM2, CLIC4, GSTM1, GSTO2, MGST3, GSTP1, GSTM5
GO:0008201: heparin binding	23	1.96078	0.00015977	LRPAP1, AOC1, NRP2, LXN, CFH, COL13A1, NDNF, PTN, NAV2, SOD3, VEGFA, TGFBR3, ADAMTS5, ADGRG1, CRISPLD2, ADAMTS1, OGN, LIPG, ANOS1, CCL2, ANG, SLIT2, FGFR2
GO:0097110: scaffold protein binding	11	0.937766	0.000381361	GJA1, CAV2, DLG4, PDE4D, KRT15, P2RY1, ATP2B4, LRP4, KRT5, DLL1, ADCY5
GO:0003779: actin binding	32	2.72805	0.00042534	FHOD3, TAGLN, PLEKHH2, SYNPO2, LMOD1, DIXDC1, CAPG, FMN2, ADD3, SYNE2, MYLK, CNN1, POF1B, CALD1, TNS4, PDLIM5, GBP1, SPTAN1, TNS1, DST, TPM2, TPM1, SORBS1, MED28, ENAH, CEACAM1, SMTN, PALLD, KCNMA1, S100A4, ANG, VCL
GO:0008307: structural constituent of muscle	10	0.852515	0.000596553	SYNM, KRT19, SMTN, TPM4, ASPH, TPM2, TPM1, MYH11, SORBS2, MYL9
GO:0008134: transcription factor binding	32	2.72805	0.000611601	CEBPB, SMARCD3, EPAS1, NAB1, FHL2, RORA, GATA3, PIK3R1, PURA, TRIM6, IFI16, HEY1, ENPP2, FLNA, TBL1X, HOXA7, PPARGC1A, TCF7L2, MYOCD, RBFOX2, LMO4, GPX3, STAT3, TMEM173, TRERF1, MEIS2, MDFIC, NFIA, KAT6A, ID1, BCL2, PPARD
GO:0005200: structural constituent of cytoskeleton	17	1.44928	0.000646513	SYNM, TPM1, TUBE1, SORBS2, KRT5, ADD3, TUBA4A, EPB41L4A, KRT19, FRMD5, FRMD6, DES, KRT17, KRT15, KRT14, NEFH, SPTAN1
GO:0004115: 3',5'-cyclic-AMP phosphodiesterase activity	6	0.511509	0.00124042	PDE11A, PDE10A, PDE4D, PDE4B, PDE4A, PDE8B
GO:0004714: transmembrane receptor protein tyrosine kinase activity	9	0.767263	0.0013496	NTRK2, FLT1, NTRK3, KIT, KDR, ROR2, MET, EGFR, FGFR2
GO:0005515: protein binding	560	47.7408	0.00158779	TFRC, C2ORF88, SMC5, MYLK, GJA1, LSM11, PSMD5, FAM110C, SOX15, DPYSL3, NAMPT, IER3, TSPYL2, C14ORF159, CCBE1, GABARAPL1, WSB1, RBFOX2, PRKCB, UNC5B, SERPINF1, COL23A1, ZNF10, PRKCA, ARMC8, SYTL4, SULT2B1, RBP7, EID3, RNF128, SDPR, MAP1B, FEZ1, MAP1A, ANOS1, ATF3, SF1, LRPAP1, ZNF394, LXN, CFH, COL13A1, GATA3, CYB5R2, PLAC9, FAM124A, FLRT3, S100A16, PDGFC, PIP5K1B, SFN, PROM1, PPARGC1A, ATG5, FZD1…
GO:0008092: cytoskeletal protein binding	10	0.852515	0.00163824	EPB41L4A, FRMD5, DES, ANXA2, TPM1, LDB3, ANXA2P2, SORBS1, FLNC, SLC8A1
GO:0005518: collagen binding	11	0.937766	0.00233067	CCBE1, PAK1, ADGRG1, C1QTNF1, ITGA2, ADGRG6, NID1, CD44, COCH, ITGA9, CTSB
GO:0043295: glutathione binding	5	0.426257	0.00275132	GSTM4, GSTM3, GSTM2, GSTM1, GSTP1
GO:0030165: PDZ domain binding	13	1.10827	0.00417781	FZD1, DTNA, FZD7, SDC2, PTEN, ATP2B4, LPAR1, PSEN1, SHISA9, NKD1, TGFBR3, GJA1, DLG4
GO:0005080: protein kinase C binding	9	0.767263	0.00476512	SDC4, IRS1, SDPR, PRKCB, FEZ1, HSPB1, LDB3, PDLIM5, DACT1
GO:0005198: structural molecule activity	26	2.21654	0.00535571	CSTA, LAMA3, KRT23, ADD3, TTBK2, PGM5, PLAC4, NEFH, KRT222, SCARA3, ANXA1, LAMB3, CAV1, KRT13, KRT7, KRT5, GNL1, KRT19, DES, KRT17, ASPH, KRT15, MAP1B, KRT14, MAP1A, VCL
GO:0005114: type II transforming growth factor beta receptor binding	4	0.341006	0.0058381	TGFBR3, TGFB2, TGFB3, TGFBR1
GO:0005178: integrin binding	14	1.19352	0.00817024	DST, ITGA2, CIB2, NRG1, FBLN1, EMP2, IGF1, EGFR, ADAMTS5, KDR, CD9, S1PR3, PLPP3, JAM3
GO:0004114: 3',5'-cyclic-nucleotide phosphodiesterase activity	6	0.511509	0.00941646	PDE11A, PDE10A, PDE4D, PDE4B, PDE4A, PDE8B
GO:0051015: actin filament binding	16	1.36402	0.0102513	SVIL, TPM4, WDR1, TPM2, TPM1, WIPF3, DSTN, SHROOM1, EGFR, SHROOM4, SYNE2, FLNA, MYH11, FLNC, AJUBA, PKNOX2
GO:0001046: core promoter sequence-specific DNA binding	8	0.682012	0.0116301	KLF10, MYOCD, NR4A3, THRAP3, CREM, RORA, GATA3, ZNF750
GO:0008191: metalloendopeptidase inhibitor activity	5	0.426257	0.0120079	BST2, LXN, SPOCK3, TIMP3, TIMP4
GO:0043236: laminin binding	6	0.511509	0.0135003	LGALS3, GPC1, ITGA2, ADGRG6, NID1, ITGA9
GO:0044325: ion channel binding	14	1.19352	0.0146835	CAMK2D, TRPC1, PDE4D, CAV1, FHL1, KCNAB1, SLC8A1, ASPH, ID2, PDE4B, FLNA, GPD1L, CALM1, SCN4B
GO:0004872: receptor activity	22	1.87553	0.0161986	ADCYAP1R1, AOC1, NRP2, CD40, CD93, ITGB4, NRXN1, IGSF1, PAQR3, SLC40A1, NRXN3, TNFRSF10B, MCC, ANTXR2, THRAP3, ANPEP, P2RY1, FAS, ITGB8, TNFRSF25, LDLR, TLR3
GO:0005391: sodium:potassium-exchanging ATPase activity	4	0.341006	0.0175406	ATP1B3, ATP1A2, ATP1B2, ATP1B1
GO:0019834: phospholipase A2 inhibitor activity	3	0.255754	0.018932	ANXA1, ANXA2, SCGB1A1
GO:0051287: NAD binding	7	0.59676	0.0218284	BDH2, ME1, SORD, AOX1, PHGDH, GPD1L, IDH3A
GO:0043548: phosphatidylinositol 3-kinase binding	5	0.426257	0.0222517	DAB1, IRS1, DAB2IP, IRS2, PIK3R1
GO:0035259: glucocorticoid receptor binding	4	0.341006	0.0230866	CEBPB, NR4A3, STAT3, ETS2
GO:0005102: receptor binding	31	2.6428	0.025433	LRPAP1, SMARCD3, TRAF3IP2, NRXN1, LAMA3, PLG, DPP4, GJA1, CCL2, ITGB8, CYTL1, FZD1, GSTM2, TGFB2, ANXA1, EDN3, CAV1, RARRES2, NRG1, GFRA1, NSG1, MTSS1, HLA-E, BMP2, CXCL12, ACOX2, CAT, ANGPTL2, ANG, PGR, NECTIN1
GO:0001078: transcriptional repressor activity, RNA polymerase II core promoter proximal region sequence-specific binding	13	1.10827	0.0287688	TGIF1, TSHZ3, BCL11A, PRDM5, ZBTB20, GATA3, ETS2, TBX3, IFI16, BHLHE40, SNAI2, SKIL, ATF3
GO:0015075: ion transmembrane transporter activity	4	0.341006	0.0294697	GJA1, S100A6, SFXN3, PLP2
GO:0097109: neuroligin family protein binding	3	0.255754	0.0303381	DLG4, NRXN1, NRXN3
GO:0004602: glutathione peroxidase activity	5	0.426257	0.0313336	GSTM2, GPX2, GPX3, MGST3, GSTP1
GO:0008144: drug binding	10	0.852515	0.0327155	AOC1, CHRM1, PDE10A, GSTP1, PDE4D, NAMPT, CYP4B1, ATP1A2, ATP1B1, PPARD
GO:0002020: protease binding	12	1.02302	0.0337108	DPP4, CCBE1, CSTA, ANXA2, IL1R1, KIT, BCL2, LCN2, TIMP3, SERPINB9, LDLR, TIMP4
GO:0001948:glycoprotein binding	9	0.767263	0.0350197	AZGP1, TFRC, FBXO17, CNTN1, FLNA, SDC1, B2M, LDLR, EGFR
GO:0005088: Ras guanyl-nucleotide exchange factor activity	13	1.10827	0.0364893	CAMK2D, ANGPT1, IRS1, NRG1, GFRA1, IRS2, EGFR, KITLG, DLG4, KIT, CALM1, SPTAN1, FGFR2
GO:0004601: peroxidase activity	5	0.426257	0.0365777	DUOX1, GPX3, MGST3, PTGS2, PTGS1
GO:0046332: SMAD binding	7	0.59676	0.0377466	TGFBR3, PURA, BMP2, MAGI2, FLNA, SKIL, TGFBR1
GO:0043237: laminin-1 binding	3	0.255754	0.0437636	NTN4, SLIT2, NID1
GO:0030197: extracellular matrix constituent, lubricant activity	3	0.255754	0.0437636	MUC3, MUC3A, MUC4
GO:0043565: sequence-specific DNA binding	41	3.49531	0.0439357	CEBPB, ZNF394, HLF, EPAS1, PRDM5, CREM, RORA, TFCP2L1, NR3C1, HOXD11, HOXD10, ETS2, FOXQ1, KRBOX1, SNAPC1, TRPS1, HIVEP2, HOXA7, SOX7, PPARGC1A, TP63, TCF7L2, TCF7L1, PRRX1, FOXF1, ZNF75D, MEIS2, TBX3, FOSL2, ELF1, NR4A3, MAF, ELF4, ZNF516, BCL2, SNAI2, ZNF711, PGR, ZNF532, ATF3, PPARD
GO:0004185: serine-type carboxypeptidase activity	4	0.341006	0.0447095	CPM, SCPEP1, CPXM1, CPVL
GO:0030552: cAMP binding	5	0.426257	0.0484884	PDE11A, PDE10A, PDE4D, PDE4B, PDE4A
GO:0001228: transcriptional activator activity, RNA polymerase II transcription regulatory region sequence-specific binding	11	0.937766	0.0506367	MYOCD, MAF, FOXF1, TRPS1, PLAGL1, LMO2, STAT3, HOXD13, GATA3, ATF3, ETV5
GO:0003714: transcription corepressor activity	19	1.61978	0.051483	TGIF1, ZHX2, TLE2, RBFOX2, GMNN, ATN1, TFCP2L1, HIF3A, MEIS2, BASP1, BHLHE40, ID4, TBL1X, SKIL, AJUBA, LMCD1, ATF3, JAZF1, SF1
GO:0004871: signal transducer activity	19	1.61978	0.0535258	GNAZ, CD40, IL1R1, IRS1, FST, PLCL1, MAGI2, STAT3, IRS2, RHOC, BST2, GJA1, GNAL, FAS, PKP1, FLNA, CSPG4, TRIM38, GNB5
GO:0005161: platelet-derived growth factor receptor binding	4	0.341006	0.0535281	IL1R1, PDGFC, PTEN, VEGFA
GO:0004867: serine-type endopeptidase inhibitor activity	11	0.937766	0.0568902	ITIH5, SERPINB11, SERPINB1, SERPINF1, COL7A1, CPAMD8, ANOS1, WFDC1, SERPINB9, SERPINB5, WFDC2
GO:0008046: axon guidance receptor activity	3	0.255754	0.0589338	EPHA7, EPHB1, ROBO1
GO:0005004: GPI-linked ephrin receptor activity	3	0.255754	0.0589338	EPHA5, EPHA7, NTRK3
GO:0005021: vascular endothelial growth factor-activated receptor activity	3	0.255754	0.0589338	NRP2, FLT1, KDR
GO:0050840: extracellular matrix binding	5	0.426257	0.0622843	ADAMTS5, ADGRG1, ADGRG6, OLFML2A, VEGFA
GO:0001105: RNA polymerase II transcription coactivator activity	6	0.511509	0.0625467	MKL2, MYOCD, CITED1, PRRX1, JADE1, PSIP1
GO:0005229: intracellular calcium activated chloride channel activity	4	0.341006	0.0631096	CLCA2, ANO4, ANO5, CLCA4
GO:0046934: phosphatidylinositol-4,5-bisphosphate 3-kinase activity	8	0.682012	0.0689804	KITLG, IRS1, KIT, IRS2, NRG1, PIK3R1, EGFR, FGFR2
GO:0045499: chemorepellent activity	5	0.426257	0.0698758	EPHA7, FLRT3, SEMA6D, NRG1, EFNA5
GO:0005496: steroid binding	5	0.426257	0.0698758	PAQR8, PAQR7, PGR, CYP3A4, NR3C1
GO:0005246: calcium channel regulator activity	5	0.426257	0.0698758	PLN, PRKCB, NRXN1, NRXN3, PRKG1
GO:0070330: aromatase activity	5	0.426257	0.0698758	CYP3A7-CYP3A51P, CYP4X1, CYP4B1, CYP3A4, CYP3A5
GO:0019900: kinase binding	9	0.767263	0.0709119	CEACAM1, CEBPB, DLG4, TRIP6, DAB2IP, FAS, FLNA, EMP2, JAKMIP1
GO:0004029: aldehyde dehydrogenase (NAD) activity	4	0.341006	0.0734211	ALDH3A2, ALDH2, ALDH1A2, ALDH1L2
GO:0019903: protein phosphatase binding	8	0.682012	0.0738873	CEACAM1, PPP1R3C, DLG4, STAT3, IRS2, PIK3R1, MET, EGFR
GO:0102391: decanoate--CoA ligase activity	3	0.255754	0.0755992	ACSL1, ACSBG1, ACSL4
GO:0035035: histone acetyltransferase binding	5	0.426257	0.0779182	MYOCD, CEBPB, NR4A3, EPAS1, KANSL1L
GO:0043014: alpha-tubulin binding	5	0.426257	0.0779182	TTLL7, ARL4C, FAM110C, PPARGC1A, NDEL1
GO:0042802: identical protein binding	54	4.60358	0.0834077	TFRC, HSPB8, PTEN, FHL2, HSPB1, ROBO1, ALAD, B2M, TP63, NDEL1, ZHX2, S100A2, GSTO2, SORD, TMEM173, MTSS1, EID3, S100A4, ANGPTL4, ACPP, CRYAB, TLR3, ATF3, SF1, PLEKHH2, OAT, NPR2, FBLN1, EGFR, DPP4, PLN, SFN, SLIT2, GBP1, LDLR, GSTM3, TGFB3, FUS, NDE1, CAV1, STAT3, DAB2IP, SNCAIP, SYT9, VEGFA, RCAN1, DES, COL7A1, BCL2, FAS, PTX3, AMOTL1, GSTM5, BNIPL
GO:0043395: heparan sulfate proteoglycan binding	4	0.341006	0.0844255	CFH, GPC1, FST, GPC6
GO:0005539: glycosaminoglycan binding	4	0.341006	0.0844255	TGFBR3, VIT, SPOCK3, NDNF
GO:0001671: ATPase activator activity	4	0.341006	0.0844255	DNAJC7, ATP1B3, ATP1B2, ATP1B1
GO:0003713: transcription coactivator activity	21	1.79028	0.0906598	MEG3, MKL2, MYOCD, SMARCD3, CITED1, PRRX1, RBPMS, MAML2, FUS, TAF11, FHL2, GATA3, HIF3A, SUPT3H, PER2, PDLIM1, THRAP3, KAT6A, LPIN1, PPARGC1A, PPARD
GO:0008083: growth factor activity	15	1.27877	0.0926095	JAG2, TGFB2, TGFB3, NRG1, PTN, IGF1, VEGFA, BMP2, KITLG, CXCL12, EFEMP1, PDGFC, OGN, NDP, PROK1
GO:0008179: adenylate cyclase binding	3	0.255754	0.0935336	AKAP12, ADCYAP1R1, ADCY5
GO:0030957: Tat protein binding	3	0.255754	0.0935336	GABARAPL1, MDFIC, DLL1
GO:0036312: phosphatidylinositol 3-kinase regulatory subunit binding	3	0.255754	0.0935336	DAB2IP, PIK3R1, FAM83B
GO:0051371: muscle alpha-actinin binding	3	0.255754	0.0935336	PALLD, SYNPO2, LDB3
GO:0008373: sialyltransferase activity	4	0.341006	0.0960831	ST6GALNAC2, ST8SIA1, ST3GAL5, ST3GAL6
GO:0016620: oxidoreductase activity, acting on the aldehyde or oxo group of donors, NAD or NADP as acceptor	4	0.341006	0.0960831	ALDH3A2, ALDH2, ALDH1A2, ALDH1L2
GO:0001077: transcriptional activator activity, RNA polymerase II core promoter proximal region sequence-specific binding	20	1.70503	0.0983588	MYOCD, CEBPB, HLF, EPAS1, STAT3, HOXD13, GATA3, NR3C1, MEIS2, CARF, ELF1, NR4A3, NFIA, ELF4, PGR, HOXA7, SSBP2, TEAD1, TP63, ZNF750

## Sheet: Sheet4
Supplementary file S11: Significant downregulated differentially expressed genes involved in GO KEGG Pathway
Term	Count	Percent(%)	P-Value	Genes
hsa04510: Focal adhesion	38	3.23956	1.07494e-09	FLT1, ITGB4, LAMA3, PTEN, TNC, PIK3R1, EGFR, MYLK, PAK1, RAP1A, CCND2, PDGFC, KDR, FLNA, ITGB8, FLNC, PAK3, VAV3, COL27A1, LAMB3, PRKCB, CAV2, CAV1, ITGA2, LAMB4, PRKCA, IGF1, VEGFA, COL6A1, COL4A6, BCL2, COL4A5, ITGA7, MET, MYL9, SOS2, VCL, ITGA9
hsa05414: Dilated cardiomyopathy	20	1.70503	3.58681e-07	TGFB2, TPM4, TGFB3, ITGB4, TPM2, CACNA2D1, ITGA2, TPM1, IGF1, ADCY5, ACTC1, PLN, DES, SGCD, CACNB4, SGCB, ITGB8, ITGA7, SGCG, ITGA9
hsa05410: Hypertrophic cardiomyopathy (HCM)	18	1.53453	2.58538e-06	TGFB2, TPM4, TGFB3, ITGB4, TPM2, CACNA2D1, ITGA2, TPM1, IGF1, ACTC1, DES, SGCD, CACNB4, SGCB, ITGB8, ITGA7, SGCG, ITGA9
hsa05205: Proteoglycans in cancer	30	2.55754	7.25009e-06	CAMK2D, SDC4, SDC2, ITPR1, PIK3R1, HOXD10, EGFR, PAK1, RRAS, GPC1, KDR, FLNA, TIMP3, FLNC, FZD1, TGFB2, PRKCB, CAV2, FZD7, CAV1, ITGA2, STAT3, PRKCA, IGF1, VEGFA, FAS, SDC1, MET, SOS2, CD44
hsa04512: ECM-receptor interaction	18	1.53453	1.23473e-05	COL27A1, LAMB3, SDC4, ITGB4, ITGA2, LAMA3, LAMB4, TNC, SV2B, COL6A1, COL4A6, COL4A5, SDC1, ITGB8, ITGA7, CD47, CD44, ITGA9
hsa04974: Protein digestion and absorption	17	1.44928	5.63568e-05	COL17A1, SLC15A1, COL27A1, MME, COL13A1, ATP1B3, ATP1A2, ATP1B2, ATP1B1, SLC8A1, DPP4, SLC7A8, COL7A1, COL6A1, COL4A6, COL9A1, COL4A5
hsa05412: Arrhythmogenic right ventricular cardiomyopathy (ARVC)	14	1.19352	0.000140845	TCF7L2, TCF7L1, ITGB4, CACNA2D1, ITGA2, GJA1, DES, SGCD, CACNB4, SGCB, ITGB8, ITGA7, SGCG, ITGA9
hsa00480: Glutathione metabolism	12	1.02302	0.000171212	GSTM4, GSTM3, GSTM2, GPX2, GGT7, GSTM1, GSTO2, GPX3, ANPEP, MGST3, GSTP1, GSTM5
hsa04022: cGMP-PKG signaling pathway	23	1.96078	0.000171365	KCNJ8, IRS1, NPR2, ATP2B4, ITPR1, ATP1B3, IRS2, ATP1A2, ATP1B2, ATP1B1, ADRA1A, SLC8A1, ADCY5, MYLK, PLN, EDNRB, PPP3CC, KCNMB1, KCNMA1, CALM1, SLC25A4, MYL9, PRKG1
hsa04261: Adrenergic signaling in cardiomyocytes	21	1.79028	0.000194769	CAMK2D, TPM4, TPM2, CACNA2D1, TPM1, ATP2B4, CREM, ATP1B3, PRKCA, ATP1A2, ATP1B2, ATP1B1, ADRA1A, ADCY5, ACTC1, PLN, CACNB4, BCL2, SCN7A, CALM1, SCN4B
hsa05200: Pathways in cancer	42	3.58056	0.000310944	EPAS1, GSTP1, PTGER2, LAMA3, PTGER3, PTEN, LPAR1, PIK3R1, PTGS2, EGFR, ADCY5, EDNRB, MECOM, FZD1, TCF7L2, TGFB2, TCF7L1, LAMB3, TGFB3, PRKCB, FZD7, ITGA2, LAMB4, STAT3, PRKCA, IGF1, TGFBR1, VEGFA, BMP2, KITLG, CXCL12, LPAR6, KIT, COL4A6, BCL2, COL4A5, FAS, GNB5, MET, SOS2, FGFR2, PPARD
hsa04151: PI3K-Akt signaling pathway	38	3.23956	0.000359545	FLT1, CHRM1, IRS1, ITGB4, LAMA3, PTEN, TNC, LPAR1, PIK3R1, EFNA5, EGFR, BCL2L11, CCND2, PDGFC, KDR, ITGB8, IL6R, COL27A1, LAMB3, ANGPT1, ITGA2, LAMB4, PRKCA, IGF1, VEGFA, KITLG, LPAR6, COL6A1, KIT, COL4A6, BCL2, COL4A5, ITGA7, GNB5, MET, SOS2, FGFR2, ITGA9
hsa04960: Aldosterone-regulated sodium reabsorption	10	0.852515	0.000391526	IRS1, PRKCB, ATP1B3, SFN, PRKCA, ATP1A2, ATP1B2, IGF1, PIK3R1, ATP1B1
hsa05146: Amoebiasis	17	1.44928	0.000529576	TGFB2, SERPINB1, COL27A1, LAMB3, IL1R1, TGFB3, PRKCB, LAMA3, LAMB4, HSPB1, PRKCA, SERPINB9, PIK3R1, GNAL, COL4A6, COL4A5, VCL
hsa04360: Axon guidance	19	1.61978	0.00053153	EPHA5, NTNG2, ROBO3, EPHA7, UNC5B, SEMA6D, NTN4, UNC5D, EFNA5, NTN1, ROBO1, PAK1, CXCL12, PPP3CC, SLIT2, SRGAP3, PAK3, MET, EPHB1
hsa05204: Chemical carcinogenesis	14	1.19352	0.000857861	GSTM4, GSTM3, GSTM2, CYP3A7-CYP3A51P, GSTM1, GSTO2, MGST3, GSTP1, CYP3A4, PTGS2, CYP3A5, HSD11B1, NAT1, GSTM5
hsa04972: Pancreatic secretion	15	1.27877	0.00119664	PRKCB, TRPC1, ATP2B4, ITPR1, ATP1B3, PRKCA, ATP1A2, ATP1B2, ATP1B1, ADCY5, RAP1A, KCNMA1, CLCA2, CD38, CLCA4
hsa04024: cAMP signaling pathway	24	2.04604	0.00166444	VAV3, CAMK2D, ADCYAP1R1, CHRM1, GIPR, PTGER2, PDE4D, PTGER3, ATP2B4, ATP1B3, ATP1A2, ATP1B2, PIK3R1, ATP1B1, ADCY5, AFDN, PAK1, PLN, RAP1A, RRAS, PDE4B, PDE4A, CALM1, MYL9
hsa04970: Salivary secretion	14	1.19352	0.00170713	PRKCB, ATP2B4, ITPR1, ATP1B3, PRKCA, ATP1A2, ATP1B2, ATP1B1, ADRA1A, ADCY5, KCNMA1, CD38, CALM1, PRKG1
hsa04015: Rap1 signaling pathway	24	2.04604	0.00356975	FLT1, ANGPT1, PRKCB, MAGI2, LPAR1, PRKCA, PIK3R1, IGF1, EFNA5, EGFR, ADCY5, VEGFA, AFDN, KITLG, RAP1A, RRAS, PDGFC, P2RY1, ID1, KIT, KDR, CALM1, MET, FGFR2
hsa04066: HIF-1 signaling pathway	14	1.19352	0.00459243	CAMK2D, FLT1, ANGPT1, TFRC, PRKCB, STAT3, PRKCA, PIK3R1, IGF1, EGFR, VEGFA, TF, BCL2, IL6R
hsa04260: Cardiac muscle contraction	12	1.02302	0.00480678	COX7B, CACNB4, ACTC1, TPM4, TPM2, CACNA2D1, TPM1, ATP1B3, ATP1A2, ATP1B2, ATP1B1, COX7A1
hsa03320: PPAR signaling pathway	11	0.937766	0.00621455	CYP27A1, FADS2, ACADL, ACOX2, ACSL1, SCD5, ACSBG1, ACSL4, SORBS1, ANGPTL4, PPARD
hsa00982: Drug metabolism - cytochrome P450	11	0.937766	0.00690783	GSTM4, GSTM3, GSTM2, GSTM1, GSTO2, MGST3, GSTP1, AOX1, CYP3A4, CYP3A5, GSTM5
hsa04014: Ras signaling pathway	24	2.04604	0.00869361	FLT1, ANGPT1, PRKCB, PRKCA, PIK3R1, IGF1, EFNA5, ETS2, EGFR, VEGFA, AFDN, PAK1, KITLG, RAP1A, RRAS, PDGFC, KIT, KDR, GNB5, CALM1, PAK3, MET, SOS2, FGFR2
hsa04520: Adherens junction	11	0.937766	0.00935109	TCF7L2, AFDN, TCF7L1, SNAI2, SORBS1, MET, SSX2IP, EGFR, TGFBR1, VCL, NECTIN1
hsa04270: Vascular smooth muscle contraction	15	1.27877	0.010005	PPP1R14A, PRKCB, NPR2, ITPR1, PRKCA, ADRA1A, ACTG2, ADCY5, MYLK, CALD1, KCNMB1, KCNMA1, CALM1, MYL9, PRKG1
hsa04020: Calcium signaling pathway	20	1.70503	0.0106983	CAMK2D, CHRM1, PRKCB, PTGER3, ATP2B4, ITPR1, PRKCA, ADRA1A, EGFR, SLC8A1, MYLK, PLN, CYSLTR2, GNAL, EDNRB, PPP3CC, TBXA2R, CD38, CALM1, SLC25A4
hsa04971: Gastric acid secretion	11	0.937766	0.0113144	CAMK2D, PRKCB, ITPR1, ATP1B3, PRKCA, ATP1A2, ATP1B2, ATP1B1, CALM1, MYLK, ADCY5
hsa00980: Metabolism of xenobiotics by cytochrome P450	11	0.937766	0.0124059	GSTM4, HSD11B1, GSTM3, GSTM2, GSTM1, GSTO2, MGST3, GSTP1, CYP3A4, CYP3A5, GSTM5
hsa04924: Renin secretion	10	0.852515	0.0134997	ADCYAP1R1, PPP3CC, PTGER2, KCNMA1, CLCA2, ITPR1, CALM1, CLCA4, CTSB, ADCY5
hsa04068: FoxO signaling pathway	16	1.36402	0.0140678	TGFB2, GABARAPL1, TGFB3, IRS1, STAT3, PTEN, IRS2, PIK3R1, IGF1, FBXO32, EGFR, TGFBR1, BCL2L11, CCND2, CAT, SOS2
hsa05211: Renal cell carcinoma	10	0.852515	0.016334	TGFB2, PAK1, RAP1A, EPAS1, TGFB3, PIK3R1, PAK3, MET, SOS2, VEGFA
hsa04921: Oxytocin signaling pathway	17	1.44928	0.0175383	CAMK2D, PRKCB, CACNA2D1, NPR2, ITPR1, PRKCA, PTGS2, EGFR, ADCY5, MYLK, RCAN1, CACNB4, PPP3CC, CD38, CALM1, MYL9, KCNJ3
hsa00601: Glycosphingolipid biosynthesis - lacto and neolacto series	6	0.511509	0.0175642	ST8SIA1, B3GNT5, GCNT2, B3GNT2, ST3GAL6, ABO
hsa04390: Hippo signaling pathway	17	1.44928	0.0185757	FZD1, TCF7L2, TGFB2, TCF7L1, TGFB3, FZD7, TGFBR1, MOB1A, BMP2, FRMD6, CCND2, DLG4, ID2, ID1, SNAI2, AJUBA, TEAD1
hsa00561: Glycerolipid metabolism	9	0.767263	0.0215501	ALDH3A2, DGKE, ALDH2, DGKA, LIPG, AKR1B1, PLPP3, LPIN1, AGPAT4
hsa04514: Cell adhesion molecules (CAMs)	16	1.36402	0.0227923	NTNG2, CD40, SDC4, NRXN1, SDC2, NRXN3, SELE, HLA-E, CDH3, CNTN1, SDC1, ITGB8, HLA-DOA, ITGA9, JAM3, NECTIN1
hsa01212: Fatty acid metabolism	8	0.682012	0.0232647	FADS2, HACD1, ACAA2, ACADL, ACSL1, SCD5, ACSBG1, ACSL4
hsa04918: Thyroid hormone synthesis	10	0.852515	0.0232729	GPX2, PRKCB, GPX3, ITPR1, ATP1B3, PRKCA, ATP1A2, ATP1B2, ATP1B1, ADCY5
hsa05144: Malaria	8	0.682012	0.0257927	TGFB2, CD40, TGFB3, SDC2, CCL2, SDC1, SELE, MET
hsa04010: MAPK signaling pathway	24	2.04604	0.0294924	NTRK2, TGFB2, ZAK, IL1R1, TGFB3, PRKCB, CACNA2D1, HSPB1, PRKCA, EGFR, TGFBR1, DUSP6, PAK1, CACNB4, RAP1A, DUSP10, PPP3CC, MECOM, RRAS, FAS, FLNA, FLNC, SOS2, FGFR2
hsa04911: Insulin secretion	11	0.937766	0.0302158	CAMK2D, ADCYAP1R1, PRKCB, KCNMB1, KCNMA1, ATP1B3, PRKCA, ATP1A2, ATP1B2, ATP1B1, ADCY5
hsa04640: Hematopoietic cell lineage	11	0.937766	0.0347761	KITLG, MME, TFRC, IL1R1, ANPEP, ITGA2, KIT, CD9, CD38, IL6R, CD44
hsa04916: Melanogenesis	12	1.02302	0.0366191	FZD1, TCF7L2, CAMK2D, KITLG, TCF7L1, EDNRB, PRKCB, FZD7, KIT, PRKCA, CALM1, ADCY5
hsa05215: Prostate cancer	11	0.937766	0.0372275	TCF7L2, TCF7L1, SRD5A2, PDGFC, PTEN, BCL2, IGF1, PIK3R1, SOS2, EGFR, FGFR2
hsa04540: Gap junction	11	0.937766	0.0372275	GJA1, PRKCB, PDGFC, ITPR1, LPAR1, PRKCA, SOS2, EGFR, PRKG1, TUBA4A, ADCY5
hsa00071: Fatty acid degradation	7	0.59676	0.0378066	ALDH3A2, ACAA2, ACADL, ALDH2, ACSL1, ACSBG1, ACSL4
hsa05214: Glioma	9	0.767263	0.0395475	CAMK2D, PRKCB, PTEN, PRKCA, IGF1, PIK3R1, CALM1, SOS2, EGFR
hsa00340: Histidine metabolism	5	0.426257	0.0396009	ALDH3A2, AOC1, ALDH2, ASPA, FTCD
hsa05032: Morphine addiction	11	0.937766	0.0452935	PDE11A, PDE10A, PRKCB, PDE4D, PDE4B, PDE4A, PRKCA, GNB5, PDE8B, KCNJ3, ADCY5
hsa04978: Mineral absorption	7	0.59676	0.0460596	TF, SLC40A1, MT1G, ATP1B3, ATP1A2, ATP1B2, ATP1B1
hsa04115: p53 signaling pathway	9	0.767263	0.0461182	STEAP3, CCND2, PERP, PTEN, FAS, SFN, IGF1, SERPINB5, RPRM
hsa04810: Regulation of actin cytoskeleton	20	1.70503	0.0471849	VAV3, CHRM1, ITGB4, ITGA2, PIK3R1, EGFR, MYLK, ENAH, PAK1, RRAS, PDGFC, ITGB8, ITGA7, PIP5K1B, PAK3, MYL9, SOS2, VCL, FGFR2, ITGA9
hsa04923: Regulation of lipolysis in adipocytes	8	0.682012	0.0488188	IRS1, PTGER3, IRS2, PIK3R1, PTGS2, PRKG1, PTGS1, ADCY5
hsa04961: Endocrine and other factor-regulated calcium reabsorption	7	0.59676	0.0505741	KLK1, PRKCB, ATP1B3, PRKCA, ATP1A2, ATP1B2, ATP1B1
hsa04713: Circadian entrainment	11	0.937766	0.05778	PER2, CAMK2D, ADCYAP1R1, PRKCB, ITPR1, PRKCA, GNB5, CALM1, PRKG1, KCNJ3, ADCY5
hsa05206: MicroRNAs in cancer	25	2.13129	0.0585476	IRS1, PTEN, TNC, IRS2, PTGS2, HOXD10, MIR205, EGFR, BCL2L11, CCND2, TIMP3, TP63, TGFB2, PRKCB, TPM1, STAT3, PRKCA, SERPINB5, VEGFA, ZEB2, BCL2, SPRY2, MET, SOS2, CD44
hsa04350: TGF-beta signaling pathway	10	0.852515	0.0636543	TGIF1, TGFB2, BMP2, TGFB3, FST, ID2, ID1, ID4, NBL1, TGFBR1
hsa05222: Small cell lung cancer	10	0.852515	0.0676141	LAMB3, ITGA2, LAMA3, LAMB4, PTEN, BCL2, COL4A6, COL4A5, PIK3R1, PTGS2
hsa04070: Phosphatidylinositol signaling system	11	0.937766	0.0684964	DGKE, PRKCB, DGKA, PTEN, ITPR1, PRKCA, PIP5K1B, PIK3R1, CALM1, IP6K3, CDS2
hsa04310: Wnt signaling pathway	14	1.19352	0.0701816	FZD1, TCF7L2, TCF7L1, CAMK2D, PRKCB, FZD7, PRKCA, PSEN1, NKD1, PPP3CC, CCND2, WIF1, TBL1X, PPARD
hsa04370: VEGF signaling pathway	8	0.682012	0.071403	PPP3CC, PRKCB, KDR, HSPB1, PRKCA, PIK3R1, PTGS2, VEGFA
hsa05202: Transcriptional misregulation in cancer	16	1.36402	0.075869	CEBPB, CD40, FLT1, FUS, LMO2, IGF1, ETV5, SUPT3H, PER2, CDK9, NR4A3, CCND2, MAF, ID2, PROM1, MET
hsa05231: Choline metabolism in cancer	11	0.937766	0.0804011	PCYT1B, DGKE, PRKCB, DGKA, PDGFC, PRKCA, PIP5K1B, PIK3R1, PLPP3, SOS2, EGFR
hsa00380: Tryptophan metabolism	6	0.511509	0.0891745	ALDH3A2, AOC1, ALDH2, CAT, AOX1, INMT
hsa00760: Nicotinate and nicotinamide metabolism	5	0.426257	0.0928874	NMRK1, QPRT, NAMPT, CD38, AOX1
