# Supplementary material for: Identification of Potential Key Genes in Prostate Cancer with Gene Expression, Pivotal Pathways and Regulatory Networks Analysis Using Integrated Bioinformatics Methods
Source: MDPI journal article supplement (doi:10.3390/genes13040655), 2022-04-07
Supplement: s1 [file Supplementary file S12.xlsx]

## Sheet: Sheet1
Supplemetary file 12 : Identification of key genes using multiple topological properties.
Criteria-1		Criteria-2		Criteria-3 (Hub genes)		Criteria-4		Criteria-5 (Bottle Neck gene)
Betweenness Centrality	name	ClosenessCentrality	name	Degree	name	Stress	name	Name	Score
0.0778182	EGFR	1	C11or f96	190	EGFR	2474712	EGFR	VEGFA	110
0.0665202	MYC	1	TMEM106C	178	VEGFA	2324164	MYC	MYC	71
0.0655446	VEGFA	1	DMKN	166	MYC	2126774	VEGFA	EGFR	39
0.02807	STAT3	1	PRELID2	117	STAT3	999744	STAT3	PIK3R1	24
0.0259963	CAT	1	UBXN10	113	CD44	985654	PTEN	STAT3	23
0.0256678	PTEN	1	ZNF613	111	CDK1	831504	CD44	CDK1	20
0.0255851	VCL	0.438621	EGFR	110	PTEN	779764	VCL	PTEN	17
0.0216796	EZH2	0.437762	MYC	97	CCNB1	748656	EZH2	GART	14
0.0210668	CD44	0.436055	VEGFA	95	EZH2	733580	CAT	PTGS2	12
0.0200249	CAV1	0.414899	PTEN	89	AURKA	670802	CAV1	RHOC	12

## Sheet: Sheet2
Supplementary file S12: List of key genes, hub genes, bottleneck genes, hub & bottle neck genes, uniuqe genes, gene that following more than one criteria.
Key genes regulator	Hub genes & Bottle neck genes	Hub genes	Bottle neck genes	Gene with more tha one criteria		Unique Gene
EGFR	EGFR	CCNB1	PIK3R1	Genes	criteria	C11orf96
MYC	MYC	EZH2	GART	STAT3	1+3+4+5	TMEM106C
VEGFA	VEGFA	AURKA	PITGS2	CAT	1+4	DMKN
PTEN	PTEN	CD44	RHOC	VCL	1+4	PRELID2
	STAT3			EZH2	1+3+4	UBXN10
	CDK1			CD44	1+3+4	ZNF613
				CAV1	1+4	CCNB1
						AURKA
						GART
						PTGS2
						RHOC
						PIK3R1
