# Supplementary material for: Identification of Potential Key Genes in Prostate Cancer with Gene Expression, Pivotal Pathways and Regulatory Networks Analysis Using Integrated Bioinformatics Methods
Source: MDPI journal article supplement (doi:10.3390/genes13040655), 2022-04-07
Supplement: s1 [file Supplimentary file S 1.xlsx]

## Sheet: Sheet1
Upregulated Differentially expressed genes					Downregulated Differentially Expressed genes
GSE32571	GSE 46602	GSE 55945	GSE 104749	Unique Upregulated DEGs genes	GSE 32571	GSE 46602	GSE 55945	GSE 104749	Unique Downregulated DEGs geens
ABCC4	AAK1	ABCC4	ACVRL1	AAK1	ACOX2	ABCC3	ACAA2	ADGRF1	ABCC3
ACTG1	ABCC4	ACSM1	ADAMTS2	ABCC4	ACTC1	ABCG2	ACSBG1	ALAD	ABCG2
ALDH3B2	ABHD2	ADAM2	ALDH3B2	ABHD2	AHNAK2	ABO	ACSF2	ANGPT1	ABO
AMACR	ABRACL	AGMAT	APLNR	ABRACL	ALDH1A2	ACAA2	ACSS3	ANKRD65	ACAA2
APOE	ACACA	ALDH3B2	ASPM	ACACA	ALDH2	ACADL	ADAMTS5	ANO4	ACADL
B3GAT1	ACSM1	AMACR	ASPN	ACSM1	ANGPT1	ACPP	ADAMTS9-AS2	AOX1	ACOX2
C19orf48	ADRB1	APOC1	AURKA	ACTG1	ANKRD35	ACSBG1	ADCY5	AQP3	ACPP
CAMK2B	AGPAT3	APOF	AURKB	ACVRL1	ANPEP	ACSF2	ADCYAP1R1	ARMCX1	ACSBG1
CHRM3	AGR2	ARHGEF26	BICD1	ADAM2	ANXA2	ACSL1	ADGRA2	B3GNT8	ACSF2
CLDN8	AGR3	ASPN	BIRC5	ADAMTS2	AOC1	ACSL4	ADRA1A	BNIPL	ACSL1
COL2A1	AGTR1	ATP8A2	BLM	ADRB1	AOX1	ACSS3	AHNAK2	C16orf74	ACSL4
COL9A2	AIMP2	BIRC5	BUB1	AGMAT	ATP2B4	ACTG2	AJUBA	CCDC178	ACSS3
COMP	AK5	C14orf39	CAMKK2	AGPAT3	AVPI1	ADAMTS1	AKAP12	CCDC8	ACTC1
DLX1	ALDH3B2	C1orf64	CCNB1	AGR2	BNIPL	ADAMTS5	ALDH1L2	CFC1B	ACTG2
DNASE2B	ALKBH2	C2orf72	CD300LG	AGR3	C1orf106	ADAMTS9-AS2	ANGPT1	CGB7	ADAMTS1
EPCAM	AMACR	C5orf30	CDC45	AGTR1	C1QTNF1	ADD3	ANKRD35	CHST9	ADAMTS5
F5	ANLN	CACNA1D	CDC6	AIMP2	C2orf40	ADD3-AS1	ANO5	CIB4	ADAMTS9-AS2
FASN	AP1S3	CCDC78	CDK1	AK5	CALD1	ADGRG1	ANTXR2	CLCA2	ADCY5
GCNT1	APOC1	CFAP61	CDKN3	ALDH3B2	CAV1	ADGRG6	ANXA1	CLCA4	ADCYAP1R1
GDF15	APOE	CGREF1	CDT1	ALKBH2	CAV2	ADGRL4	ANXA2	CLSTN2	ADD3
GOLM1	APOF	CHDH	CENPF	AMACR	CCDC136	ADHFE1	AOC3	COL4A6	ADD3-AS1
GUCY1A3	ARFGEF3	CHKB-CPT1B///CPT1B	CENPM	ANLN	CCK	ADIRF	AOX1	CPAMD8	ADGRA2
HIST1H2BK	ARHGAP32	CHRM3	CENPU	AP1S3	CDH23	ADIRF-AS1	ARHGAP20	CWH43	ADGRF1
HIST3H2A	ARHGEF26	CRACR2B	CKS2	APLNR	CES1	ADRA1A	ARMC4	CYP3A5	ADGRG1
HOXC4	ARHGEF38	CYTH2	COL10A1	APOC1	CFB	AFAP1L2	ARMCX4	CYP3A7-CYP3A51P	ADGRG6
HOXC6	ARVCF	CYTH3	DLX1	APOE	CFD	AFDN	ASPA	CYP4F2	ADGRL4
HPN	ASPN	DLX1	DLX2	APOF	CLIC6	AFF3	ASXL3	CYP4F2///CYP4F3	ADHFE1
MARCKSL1	ATP11A	DLX2	DTL	ARFGEF3	CLIP3	AGPAT4	ATP1A2	DEFB132	ADIRF
MS4A8	ATP11B	DNAH5	E2F8	ARHGAP32	CNN1	AIFM2	ATP2B4	DGKA	ADIRF-AS1
MYO6	ATP5D	EBF2	ECT2	ARHGEF26	COL17A1	AJUBA	ATRNL1	DKFZP547J0410	ADRA1A
NCALD	ATPAF1	EDRF1	EXO1	ARHGEF38	COL4A6	AKIRIN1	BBX	DPP4	AFAP1L2
OR51E2	AURKA	ELAVL2	FAM111B	ARVCF	COL6A1	AKR1B1	BMP2	DSC3	AFDN
PLA1A	B3GAT1	ENTPD5	FAM72A	ASPM	COL9A1	ALAD	C1orf56	DUOXA1	AFF3
PLA2G7	BAIAP2-AS1	ESRP1	FANCB	ASPN	COX7A1	ALDH2	C11orf70	EFS	AGPAT4
PODXL2	BDH1	FAM117B	GALNT5	ATP11A	CPED1	ALDH3A2	C12orf75	EPHA5	AHNAK2
PPP1R14B	BEND4	FGL1	GINS1	ATP11B	CRISPLD2	ALOX12P2	C2orf40	FADS2	AIFM2
PRAC1	BICD1	FMO5	HAPLN1	ATP5D	CRYAB	AMOTL1	C2orf88	FAM135A	AJUBA
PYCR1	BIRC5	FOXD1	HMMR	ATP8A2	CSRP1	AMT	C3orf70	FOXQ1	AKAP12
RAB17	BPHL	FOXP4-AS1	ICA1	ATPAF1	CYP27A1	ANG	C5orf34	FRMD5	AKIRIN1
RAP1GAP	BUB1B	GAL	INHBA	AURKA	CYP3A5	ANGEL2	C8orf88	FTCD	AKR1B1
REPS2	C1QTNF3	GCNT1	ITGBL1	AURKB	DEFB1	ANGPT1	CA14	GAS1RR	ALAD
RER1	C1QTNF3-AMACR///AMACR	GOLM1	KCNN3	B3GAT1	DES	ANGPTL2	CALD1	GATA3	ALDH1A2
RPL29	C2orf72	GUSBP9///GUSBP3	KCTD15	BAIAP2-AS1	DKK3	ANGPTL4	CALM1	GPD1L	ALDH1L2
SBK1	C3orf80	HEY2	KIAA0101	BDH1	DLK2	ANKH	CALM3	GSTM2	ALDH2
SFRP4	C4B_2///C4B///C4A	HIST3H2A	KIF18B	BEND4	DPT	ANKRD65	CAPG	GSTO2	ALDH3A2
SIM2	C5orf30	HOXC4	KIF4A	BICD1	DPYSL3	ANO4	CARMN	HMGCLL1	ALOX12P2
SLC45A2	C9orf152	HOXC6	KIF9	BIRC5	DUOX1	ANO5	CAV2	HOXD10	AMOTL1
STX19	C9orf69	HPN	KITLG	BLM	EFEMP1	ANOS1	CCBE1	HOXD13	AMT
TARP	CACNA1D	ICA1	KSR1	BPHL	EFS	ANP32E	CCDC69	ID1	ANG
TGM3	CAMKK2	IGFN1	LBH	BUB1	FAM107A	ANTXR2	CCDC85A	ID4	ANGEL2
THBS4	CBR4	INSM1	LIN7A	BUB1B	FAM46B	ANXA1	CCK	ISPD-AS1	ANGPT1
TMEFF2	CCDC144NL-AS1	KCNQ2	LINC01600	C14orf39	FBLN1	ANXA2	CCND2	JAKMIP1	ANGPTL2
TMEM178A	CCNB1	KIF4A	IGHM	C19orf48	FCGBP	CD40	KCNK3	ANGPTL4	ANKRD35
TMSB15A	CCNG2	KLK15	LOC286121	C1QTNF3	FERMT2	CDKL1	KIAA0319	ANKH	ANKRD65
TRPM4	CDC14A	LEF1	MAPK7	C1orf64	FEZ1	ANXA2P2	CDKN1C	KLF8	ANO4
TSPAN1	CDC25A	LINC00324	MCM4	C2orf72	FHL1	AOC1	CELF2	KRBOX1	ANO5
TSPAN13	CDC42EP2	LINC00665	MELK	C3orf80	FHOD3	AOX1	CFD	LAMB4	ANOS1
VSTM2L	CDCA5	LINC00992	MGAT5B	C4B	FLNC	APCDD1	CHRDL1	LINC00293	ANP32E
	CDK19	GLYATL1	MICAL2	C5orf30	FLRT3	APOBEC3F	CHST3	LINC00844	ANPEP
	CECR2	LOC100505938	NEAT1	C9orf152	FOXQ1	APOBEC3G	CIB2	LINC01139	ANTXR2
	CENPF	LOC100506274	MYC	C9orf69	GAS1	APOL4	CLIC4	LOC100289090	ANXA1
	CENPU	LOC100507472///PCSK6	NCAPG	CACNA1D	GCNT2	AQP3	CLU	LOC100505851	ANXA2
	CERS2	LOC101927085	NUF2	CAMK2B	GPX2	ARHGAP22	CNN1	LOC100996579	ANXA2P2
	CGREF1	LOC102724156	NUSAP1	CAMKK2	GPX3	ARHGAP23	CNTN1	LOC101927499	AOC1
	CHD1L	LOC283177	OCLN	CBR4	GSTM1	ARHGAP33	COCH	STRC	AOC3
	CHDH	LOC728903///GLIDR	OIP5	CCDC144NL-AS1	GSTM2	ARHGEF28	COL13A1	LOC642426	AOX1
	CHMP4C	LUZP2	PBK	CCDC78	GSTM3	ARHGEF40	COL23A1	LOC654780	APCDD1
	CHN2	MATR3	PRC1	CCNB1	GSTM5	ARL4C	COL27A1	NBL1	APOBEC3F
	CHRM3	MICAL2	PRR11	CCNG2	GSTP1	ARMC8	COL4A6	MIR133A1HG	APOBEC3G
	CHTF18	MIR1204///PVT1	RACGAP1	CD300LG	HSPB6	ARMCX1	CSPG4	MUC3B	APOL4
	CLDN3	MIR3658///UCK2	RNFT2	CDC14A	HSPB8	ARMCX4	CSRP2	NDRG2	AQP3
	CLDN7	MIR6773///ESRP2	RPPH1	CDC25A	ID1	ASAP1	CYB5R2	KCTD14	ARHGAP20
	CLEC11A	MMP26	RRM2	CDC42EP2	IGSF1	ASAP3	CYLD	NEFH	ARHGAP22
	CLPB	MS4A8	SHCBP1	CDC45	ITGB4	ASPA	CYP3A5	NRXN1	ARHGAP23
	CMTM4	MYO6	SKA3	CDC6	JAM3	ASPH	CYTL1	ODAM	ARHGAP33
	COA7	MYRIP	SLC25A15	CDCA5	KCNAB1	ATF3	DAB1	P2RY1	ARHGEF28
	COL12A1	NAALADL2	SLC35F6///CENPA	CDK1	KCNMA1	ATG5	DACT1	PDE8B	ARHGEF40
	COL1A1	NEK5	SMPDL3B	CDK19	KCNMB1	ATN1	DIXDC1	PHYHIPL	ARL4C
	COL28A1	NOX4	SPC25	CDKN3	KIAA1210	ATP1B1	DMKN	PLEK2	ARMC4
	COL2A1	NUSAP1	SULF1	CDT1	KRT13	ATP1B2	DNAJB5	PON3	ARMC8
	COL8A1	OGT	TBL1XR1	CECR2	KRT15	ATP1B3	DNAJC15	PSMD5	ARMCX1
	COL9A2	ONECUT2	TFF3	CENPF	KRT17	ATP8B4	DOCK3	PTGDS	ARMCX4
	COMP	OPRPN	THBS2	CENPM	KRT5	ATRNL1	DPT	PTGER3	ASAP1
	CORO1B	P2RX5	TMEM132A	CENPU	KRT7	AUTS2	DPYSL3	PTX3	ASAP3
	CPLX1	PAOX	TOP2A	CERS2	LAMB3	AVPI1	DSTN	PURA	ASPA
	CRACR2B	PAQR6	TPX2	CFAP61	LARGE1	AZGP1	DTNA	RASSF8-AS1	ASPH
	CRAT	PCA3	TRIB1	CGREF1	LCN2	AZGP1P1	EDN3	RAVER2	ASXL3
	CREB3L1	PCAT7	TRIP13	CHD1L	LINC01451	B2M	EDNRB	RBFOX3	ATF3
	CTHRC1	PDLIM5	TRPM4	CHDH	LMOD1	B3GNT2	EFCAB1	RFPL1	ATG5
	CTPS1	POPDC3	TYMS	CPT1B	MEG3	B3GNT5	EFEMP1	RNF128	ATN1
	CXCL14	PRCAT47	UBE2C	CHMP4C	MEIS2	BASP1	EFHD1	SCPEP1	ATP1A2
	CYB5A	PRR36	UHRF1	CHN2	MME	BCL11A	EFNA5	SEC14L2	ATP1B1
	CYFIP2	PTP4A3	VAX2	CHRM3	MSMB	BCL2	EFS	SHISA9	ATP1B2
	CYP2J2	PYCR1	VCAN	CHTF18	MSRB3	BCL2L11	EHD2	SHROOM1	ATP1B3
	CYP39A1	RAB17	YPEL1	CKS2	MT1G	BDH2	EID3	SIDT1	ATP2B4
	CYTH2	RAP1GAP	ZNF367	CLDN3	MYH11	BEND5	ENAH	SLC14A1	ATP8B4
	CYTH3	RCC1		CLDN7	MYL9	BEX1	EPHA5	SLC16A5	ATRNL1
	DANCR	RNF144A-AS1		CLDN8	MYLK	BEX2	EPHB1	SLC22A17	AUTS2
	DAPK1	RNF157		CLEC11A	MYOF	BHLHE40	EYA4	SLC39A2	AVPI1
	DCUN1D1	RPL22L1		CLPB	NAV2	BNC2	FADS2	SLC7A8	AZGP1
	DECR2	RPL35A		CMTM4	NBL1	BNIPL	FAM107A	SMIM2	AZGP1P1
	DHFR	RPRML		COA7	NEFH	BORCS5	FAM124A	SOWAHA	B2M
	DHRS11	RPS24		COL10A1	NELL2	BST2	FAM167A	SOX15	B3GNT2
	DIAPH1	RRM2		COL12A1	NIPAL3	BTG3	FAM46B	SOX21-AS1	B3GNT5
	DIEXF	SFTPA2///SFTPA1		COL1A1	NSG1	C11orf45	FAT4	SPRY4-IT1	B3GNT8
	DLX1	SIM2		COL28A1	OLFM4	C11orf96	FBXL21	SRPX	BASP1
	DLX2	SLC19A1		COL2A1	P3H2	C14orf159	FBXO17	ST6GALNAC2	BBX
	DNAH5	SLC43A1		COL8A1	PAGE4	C15orf54	FERMT2	ST8SIA1	BCL11A
	DNAJC10	SLC45A2		COL9A2	PALLD	C15orf59	FHL1	STXBP5L	BCL2
	DNMBP	SLIT1		COMP	PARM1	C4orf19	FILIP1L	SYT16	BCL2L11
	DNPH1	SMKR1		CORO1B	PCP4	C8orf88	FLNA	TGM4	BDH2
	DOPEY2	SMPDL3B		CPLX1	PDK4	CACHD1	FLNC	TMEM198B	BEND5
	DPH2	SNHG19		CRACR2B	PGM5	CACNA2D1	FMN2	TRIM29	BEX1
	DRAIC	SNORD77		CRAT	PI15	CACNB4	FNDC4	TTLL7	BEX2
	DUS1L	STIL		CREB3L1	PLAC9	CALD1	FOXF1	UNC5D	BHLHE40
	DVL1	SV2C		CTHRC1	PNCK	CALM1	FRMD6	UNC80	BMP2
	E2F3	TARP		CTPS1	PPARGC1A	CAMK2D	FST	VSIG2	BNC2
	ECT2	TBC1D30		CXCL14	PPP1R14A	CAND2	FZD1	VSNL1	BNIPL
	EDEM3	TBX1		CYB5A	PPP1R3C	CAPG	FZD7	ZNF702P	BORCS5
	EIF4EBP1	THBS4		CYFIP2	PRDM8	CAPNS2	GAS1	ZNF750	BST2
	ELAC2	TMC5		CYP2J2	PRKCB	CARD16	GAS1RR		BTG3
	ELAVL2	TMEM45B		CYP39A1	PROM1	CARF	GCNT2		C11orf45
	ELL3	TRPM4		CYTH2	PTGDS	CARTPT	GFRA1		C11orf70
	ENC1	TXLNB		CYTH3	PTGIS	CASP1	GLDN		C11orf96
	ENTPD5	UNC80		DANCR	PTGS1	CAT	GLIS3		C12orf75
	EPB41L4B	VSTM2L		DAPK1	RARRES1	CAV1	GNAL		C14orf159
	EPCAM	ZFAS1		DCUN1D1	RARRES2	CAV2	GNAZ		C15orf54
	EPN3	ZIC2		DECR2	RASL12	CCDC8	GPC6		C15orf59
	ERG	ZNF30		DHFR	RBP1	CCDC85A	GPM6B		C16orf74
	ERGIC1	ZNF577		DHRS11	RBPMS2	CCK	GPR161		C1QTNF1
	ERVH-6			DIAPH1	RND3	CCL2	GPR87		C1orf106
	EZH2			DIEXF	ROR2	CCND2	GPRC5B		C2orf40
	F5			DLX1	RPRM	CCP110	GPX3		C2orf88
	FAM117B			DLX2	S100A4	CD177	GSTM3		C3orf70
	FAM198B			DNAH5	S100A6	CD38	GSTM4		C4orf19
	FAM222A			DNAJC10	SBSPON	CD40	HACD1		C5orf34
	FAM234B			DNASE2B	SCGB1A1	CD44	HHIPL2		C8orf88
	FAM69B			DNMBP	SCGB3A1	CD47	HIF3A		CA14
	FAM83H			DNPH1	SERPINB5	CD9	HLF		CACHD1
	FARP1			DOPEY2	SLC14A1	CD93	HMGCLL1		CACNA2D1
	FASN			DPH2	SLC16A5	CDC14B	HOXD10		CACNB4
	FBP1			DRAIC	SLC2A5	CDC42BPG	HOXD11		CALD1
	FGF13			DTL	SLC47A1	CDC42EP4	HOXD13		CALM1
	FLJ20021			DUS1L	SMOC1	CDH26	HSPB6		CALM3
	FMNL2			DVL1	SMTN	CDH3	HSPB8		CAMK2D
	FMO5			E2F3	SORBS1	CDK9	ID4		CAND2
	FNIP2			E2F8	SPON1	CDKN1C	IDH3A		CAPG
	FOXP4-AS1			EBF2	SRPX	CDS2	IGFBP5		CAPNS2
	FTSJ1			ECT2	STOX2	CEACAM1	IGSF1		CARD16///CASP1
	GAA			EDEM3	SVIL	CEBPB	INMT		CARF
	GABPB1-AS1			EDRF1	SYNM	CECR6	IP6K3		CARMN
	GABRB3			EIF4EBP1	TCEAL2	CELF2	ITGA7		CARTPT
	GALNT3			ELAC2	TGFB3	CELSR1	ITGA9		CASP1
	GALNT7			ELAVL2	TGFBR3	CELSR2	ITIH5		CAT
	GAREM1			ELL3	TGM4	CEP89	ITPR1		CAV1
	GART			ENC1	TMEM158	CFC1B	JAZF1		CAV2
	GCNT1			ENTPD5	TP63	CFD	JAZF1-AS1		CCBE1
	GDF15			EPB41L4B	TPM1	CFH	JPH2		CCDC136
	GDPD1			EPCAM	TPM2	CFHR1	JPH4		CCDC178
	GJB1			EPN3	TRIP6	CGB7	KCNAB1		CCDC69
	GJB2			ERG	UPK1A	CH17-408M7.1	KCNJ3		CCDC8
	GLYATL1			ERGIC1	VCL	CHD9	KCNK3		CCDC85A
	GMDS			ERVH-6	VSIG2	CHRM1	KCNMB1		CCK
	GOLM1			ESRP1	WFDC1	CHST11	KCNQ5		CCL2
	GPR160			EXO1		CHST15	KIF1A		CCND2
	GRAMD1A			EZH2		CHST2	KLF8		CCP110
	GREM1			F5		CIB2	KLK1		CD177
	GRK6			FAM111B		CITED1	LAPTM4B		CD38
	GSE1			FAM117B		CLIC6	LARGE1		CD40
	GUCY1A3			FAM198B		CLIP4	LDAH		CD44
	HECTD4			FAM222A		CLN5	LDB3		CD47
	HEYL			FAM234B		CLN8	LDLR		CD9
	HIP1			FAM69B		CLU	LGALS3		CD93
	HIPK2			FAM72A		CMIP	LINC00092		CDC14B
	HIST1H2BK			FAM83H		COL13A1	LINC00261		CDC42BPG
	HIST1H3E			FANCB		COL17A1	LINC00515		CDC42EP4
	HIST1H3F			FARP1		COL27A1	LINC00844		CDH23
	HIST3H2A			FASN		COL4A5	LINC00960		CDH26
	HK2			FBP1		COL4A6	LIPG		CDH3
	HMG20B			FGF13		COL7A1	LIX1		CDK9
	HOXC4			FGL1		COL9A1	LMO4		CDKL1
	HOXC6			FLJ20021		COPZ2	LMOD1		CDKN1C
	HPCAL1			FMNL2		COX7B	LOC100288911		CDS2
	HPN			FMO5		CPA6	LOC100507557		CEACAM1
	ICA1			FNIP2		CPAMD8	LOC101928731		CEBPB
	INHBA			FOXD1		CPLX3	ABCC6		CECR6
	INSM1			FOXP4-AS1		CPM	ABCC6P2		CELF2
	ISG15			FTSJ1		CPVL	LOC102723845		CELSR1
	ITGBL1			GAA		CPXM1	LOC729970		CELSR2
	IVD			GABPB1-AS1		CREM	LPP		CEP89
	KCNG3			GABRB3		CRISPLD2	LRCH2		CFB
	KCNH8			GAL		CRYAB	LSAMP		CFC1B
	KLC2			GALNT3		CSRP2	LSM11		CFD
	KNSTRN			GALNT5		CSTA	LY6G6F		CFH
	KPNA2			GALNT7		CTDSP2	MAF		CFHR1
	LAMP5			GAREM1		CTSB	MAGI2		CGB7
	LARP1			GART		CXCL12	MAGI2-AS3		CH17-408M7.1
	LARP1B			GCNT1		CYP27A1	MAL		CHD9
	LCLAT1			GDF15		CYP3A4	MAMDC2		CHRDL1
	LCORL			GDPD1		CYP3A5	MAMLD1		CHRM1
	LEF1-AS1			GINS1		CYP4B1	MAP1B		CHST11
	LHX4-AS1			GJB1		CYP4X1	MAP1LC3A		CHST15
	LIMS4///LIMS3///LIMS1			GJB2		CYSLTR2	MBNL1-AS1		CHST2
	LINC00662			GLYATL1		CYYR1	MBNL2		CHST3
	LINC00665			GMDS		DAB2IP	MDFIC		CHST9
	LINC00992			GOLM1		DANT2	ME1		CIB2
	LINC01006///C7orf13			GPR160		DCBLD2	MEG3		CIB4
	LINC01023			GRAMD1A		DEFB1	MET		CITED1
	LINC01128			GREM1		DENND2A	NBL1		CLCA2
	LINC01146			GRK6		DGKE	MIR155		CLCA4
	LOC100505938			GSE1		DKK3	FADS1		CLIC4
	PCSK6			GUCY1A3		DLC1	MCAM		CLIC6
	LOC100996455			GUSBP9		DLEU2	MN1		CLIP3
	DAB2			HAPLN1		DLG4	MOB1A		CLIP4
	LOC101927204			HECTD4		DLL1	MPP2		CLN5
	LOC101927391			HEY2		DMKN	MPZL2		CLN8
	LOC101927870			HEYL		DNAJB4	MSRB3		CLSTN2
	MTHFD1L			HIP1		DNAJC7	MYH11		CLU
	COX3			HIPK2		DNER	MYL9		CMIP
	THSD1			HIST1H2BK		DPT	MYLK		CNN1
	LOC102724842			HIST1H3E		DPYS	MYOCD		CNTN1
	NTM			HIST1H3F		DSC3	MYOF		COCH
	LOC728730			HIST3H2A		DSE	NAT1		COL13A1
	LPXN			HK2		DST	NAV2		COL17A1
	LRBA			HMG20B		DTWD1	NCS1		COL23A1
	LRRC8D			HMMR		DUBR	NDE1		COL27A1
	LRRC8E			HOXC4		DUOX1	NDNF		COL4A5
	LUZP2			HOXC6		DUSP10	NDP		COL4A6
	LYPLA1			HPCAL1		DUSP6	NDRG2		COL6A1
	MAL2			HPN		EBP	KCTD14		COL7A1
	MAML3			ICA1		EDN3	NID1		COL9A1
	MAN2B1			IGFN1		EDNRB	NIPAL3		COPZ2
	MAP2K5			INHBA		EFCAB13	NKD1		COX7A1
	MAP2K6			INSM1		EFCAB7	NRK		COX7B
	MAP4K4			ISG15		EFEMP1	NRP2		CPA6
	MARCKSL1			ITGBL1		EFHD1	NTN1		CPAMD8
	MAZ			IVD		EFS	NTRK2		CPED1
	MB			KCNG3		EGFR	NYNRIN		CPLX3
	MBOAT2			KCNH8		EHD2	OLFML2A		CPM
	MCF2L			KCNN3		ELF1	PAK1		CPVL
	MCOLN2			KCNQ2		ELF4	PAK3		CPXM1
	MEOX1			KCTD15		EMCN	PALLD		CREM
	METTL26			KIAA0101		EML5	PARM1		CRISPLD2
	MEX3D			KIF18B		EMP1	PCDH10		CRYAB
	MGAT4A			KIF4A		EMP2	PCDH7		CSPG4
	MGAT4B			KIF9		ENAH	PCDH9		CSRP1
	MICAL2			KITLG		ENPP2	PCYT1B		CSRP2
	MICALCL			KLC2		EPAS1	PDE4A		CSTA
	MIPEP			KLK15		EPB41L4A	PDE4D		CTDSP2
	SNORD110			KNSTRN		EPHA5	PDPN		CTSB
	UCK2			KPNA2		EPHA7	PDZRN4		CWH43
	FZD8			KSR1		ERLIN2	PEG10		CXCL12
	MZT2B			LAMP5		ETS2	PENK		CYB5R2
	NEAT1			LARP1		ETV5	PGM5		CYLD
	ESRP2			LARP1B		EVA1C	PGR		CYP27A1
	MKI67			LBH		EXPH5	PHYHIP		CYP3A4
	MND1			LCLAT1		EYA4	PHYHIPL		CYP3A5
	MOXD1			LCORL		FADS2	PIP5K1B		CYP3A7-CYP3A51P
	MRPL15			LEF1		FAM107A	PLAGL1		CYP4B1
	MRPL17			LEF1-AS1		FAM110C	PLCL1		CYP4F2
	MRPL37			LHX4-AS1		FAM20A	PLD5		CYP4X1
	MRPL4			LIMS4		FAM213A	PLN		CYSLTR2
	MRPL50			LIN7A		FAM27E2	PLPP3		CYTL1
	MRPS33			LINC00324		FAM43A	PMP22		CYYR1
	MS4A8			LINC00662		FAM46B	POPDC2		DAB1
	MTHFD2			LINC00665		FAM46C	PPARGC1A		DAB2IP
	MYC			LINC00992		FAM49A	PPP1R14A		DACT1
	MYEF2			C7orf13		FAM83B	PPP1R14C		DANT2
	MYL5			LINC01023		FAM86DP	PPP1R3B		DCBLD2
	MYO1B			LINC01128		FANCC	PRDM5		DEFB1
	MYO6			LINC01146		FAS	PRDM6		DEFB132
	MYRIP			LINC01600		FBLN1	PRDM8		DENND2A
	MZT2A			LOC100505938		FBXO17	PRIMA1		DES
	NAA60			LOC100506274		FBXO32	PRKCB		DGKA
	NCAPG			PCSK6		FENDRR	PRKG1		DGKE
	NDOR1			LOC100996455		FERMT1	PRO1082		DIXDC1
	NDUFV2-AS1			DAB2		FERMT2	PROK1		DKFZP547J0410
	NECTIN2			LOC101927085		FEZ1	PRRX1		DKK3
	NEK5			LOC101927204		FGFR2	PRTFDC1		DLC1
	NETO2			LOC101927391		FHDC1	PTCHD1		DLEU2
	NFXL1			LOC101927870		FHL2	PTGER2		DLG4
	NIPA1			MTHFD1L		FLJ36840	PTN		DLK2
	NME1			COX3		FLJ45482	PTRF		DLL1
	NOP16			THSD1		FLRT3	QKI		DMKN
	NPAS2			LOC102724156		FLT1	RAB40A		DNAJB4
	NUP210			LOC102724842		FOSL2	RAB9B		DNAJB5
	NUSAP1			NTM		FOXQ1	RAP1A		DNAJC15
	OCLN			IGHM		FRMD6	RBFOX2		DNAJC7
	OR51E2			LOC283177		FUS	RBFOX3		DNER
	OTUD7B			LOC286121		FXYD6	RCAN1		DOCK3
	OXSM			LOC728730		FZD7	RGN		DPP4
	PABPC1L2B			GLIDR		GABARAPL1	RGS7BP		DPT
	PAICS			LPXN		GAS1	RND3		DPYS
	PAOX			LRBA		GAS1RR	ROR2		DPYSL3
	PARP10			LRRC8D		GATA3	RPE65		DSC3
	PCA3			LRRC8E		GBP1	RPL39L		DSE
	PCAT18			LUZP2		GBP2	RPRD1A		DST
	PCAT7			LYPLA1		GBP3	RRAS		DSTN
	PCDHB14			MAL2		GCNT2	S100A16		DTNA
	PCDHGA4			MAML3		GGT7	SCARA3		DTWD1
	PCTP			MAN2B1		GIPR	SCRN1		DUBR
	PDCD2			MAP2K5		GJA1	SDC2		DUOX1
	PDCD2L			MAP2K6		GLB1L	SDC4		DUOXA1
	PDE3B			MAP4K4		GLMP	SDPR		DUSP10
	PDK1			MAPK7		GMNN	SEMA6D		DUSP6
	PDLIM5			MARCKSL1		GMPR	SGCB		EBP
	PEX10			MATR3		GNAL	SGCD		EDN3
	PGLS			MAZ		GNB5	SGCE		EDNRB
	PHF12			MB		GNL1	SGCG		EFCAB1
	PHF14			MBOAT2		GNPTAB	SH3PXD2B		EFCAB13
	KLHL23			MCF2L		GOLGA8M	SLC16A2		EFCAB7
	PICALM			MCM4		GOSR1	SLC16A5		EFEMP1
	PIGW			MCOLN2		GPC1	SLC18A2		EFHD1
	PIK3AP1			MELK		GPD1L	SLC22A17		EFNA5
	PIP5K1A			MEOX1		GPM6B	SLC24A3		EFS
	PKIB			METTL26		GPR161	SLC25A4		EGFR
	PLA2G16			MEX3D		ASB3	SLC2A5		EHD2
	PLEKHB1			MGAT4A		GPR87	SLC8A1		EID3
	PLEKHS1			MGAT4B		GPRASP1	SLITRK6		ELF1
	POLR1D			MGAT5B		GPRC5B	SLMAP		ELF4
	POSTN			MICAL2		GPX3	SMIM10L2B		EMCN
	PPA2			MICALCL		GREB1	SNAI2		EML5
	PPAN			MIPEP		GSTM1	SNHG18		EMP1
	PPM1E			PVT1		GSTM2	SORBS1		EMP2
	PPP1R14B			SNORD110		GSTM3	SORBS2		ENAH
	PPP1R9A			UCK2		GSTM4	SOWAHA		ENPP2
	PRAC1			FZD8		GSTM5	SOX15		EPAS1
	PRCAT47			MIR4784		GSTO2	SPATA6		EPB41L4A
	PRELID3B			NEAT1		GSTP1	SPG20		EPHA5
	PRKAA1			ESRP2		GTF2IRD2B	SPOCK3		EPHA7
	PRKAG2-AS1			MKI67		HACD1	SPON1		EPHB1
	PRMT6			MMP26		HADHAP1	SPRED1		ERLIN2
	PRR11			MND1		HCRP1	SRD5A2		ETS2
	PRR15L			MOXD1		HERC1	SRPX		ETV5
	PSD3			MRPL15		HEY1	SSBP2		EVA1C
	PTP4A3			MRPL17		HGSNAT	ST8SIA1		EXPH5
	PTPRN2			MRPL37		HIF3A	STAC		EYA4
	PUS1			MRPL4		HIVEP2	STARD4		FADS2
	PXDN			MRPL50		HLA-DOA	STXBP5L		FAM107A
	PXN			MRPS33		HLA-E	SUSD4		FAM110C
	QTRT2			MS4A8		HLF	SV2B		FAM124A
	RAB17			MTHFD2		HMCES	SVIL		FAM135A
	RAB30			MYC		HMGN4	SYNPO2		FAM167A
	RAB39B			MYEF2		HOTTIP	SYT16		FAM20A
	RAB3B			MYL5		HOXA7	TACC1		FAM213A
	RAB3D			MYO1B		HOXD10	TAGLN		FAM27E2
	RAB40C			MYO6		HOXD11	TBC1D1		FAM43A
	RABEP2			MYRIP		HSD11B1	TBL1X		FAM46B
	RALGAPA2			MZT2A		HSPB1	TBXA2R		FAM46C
	RAP1GAP			NAA60		HSPB6	TCEAL2		FAM49A
	RAP1GAP2			NAALADL2		HYMAI	TGFB3		FAM83B
	RASSF3			NCALD		ID2	TIMP3		FAM86DP
	RCC1			NCAPG		ID2B///ID2	TIMP4		FANCC
	RELN			NDOR1		ID4	TLR3		FAS
	REPS2			NDUFV2-AS1		IDI1	TMEM246		FAT4
	REXO2			NECTIN2		IER3	TMEM35A		FBLN1
	RGS10			NEK5		IFI16	TMEM47		FBXL21
	RGS17			NETO2		IFITM3	TMLHE		FBXO17
	RHBDD3			NFXL1		IFNLR1	TNFSF13		FBXO32
	RNA45S5			NIPA1		IGF1	TPM1		FCGBP
	RNF144A			NME1		IL10RB-AS1	TRERF1		FENDRR
	RNF44			NOP16		IL1R1	TRIM6		FERMT1
	RPL15			NOX4		IL1RL1	TRNP1		FERMT2
	RPL22L1			NPAS2		IL6R	TSLP		FEZ1
	RPS23			NUF2		INSIG1	TSPAN18		FGFR2
	RPS29			NUP210		INTS10	TSPAN2		FHDC1
	RRM2			NUSAP1		IPO5P1	TUBA4A		FHL1
	RRS1			OCLN		IQCA1	TXNL1		FHL2
	RUVBL1			OGT		IRF6	UBE2QL1		FHOD3
	SAC3D1			OIP5		IRS1	UBXN10		FILIP1L
	SAMD5			ONECUT2		IRS2	UBXN10-AS1		FLJ36840
	SAPCD2			OPRPN		ITGA2	VCL		FLNA
	SBK1			OR51E2		ITGB4	VIT		FLNC
	SCRIB			OTUD7B		ITGB8	VSNL1		FLRT3
	SEL1L3			OXSM		ITIH5	VSTM4		FLT1
	SERF1B			P2RX5		JADE1	VWA5A		FMN2
	SFRP4			PABPC1L2B		JAG2	WFDC1		FNDC4
	SH2D4A			PAICS		KANK4	WIPF3		FOSL2
	SH3BGRL3			PAOX		KANSL1L	YBX2		FOXF1
	SH3RF1			PAQR6		KAT6A	ZAK		FOXQ1
	SH3RF3			PARP10		KCNJ8	ZBTB20		FRMD5
	SHROOM3			PBK		KCNK3	ZNF204P		FRMD6
	SIM2			PCA3		KDR	ZNF516		FST
	SLC12A8			PCAT18		KIAA1210	ZNF655		FTCD
	SLC19A1			PCAT7		KIF1A	ZNF711		FUS
	SLC22A23			PCDHB14		KIF5C			FXYD6
	SLC25A27			PCDHGA4		KIT			FZD1
	SLC25A33			PCTP		KITLG			FZD7
	SLC25A42			PDCD2		KLF10			GABARAPL1
	SLC27A2			PDCD2L		KLF8			GAS1
	SLC29A2			PDE3B		KLHL15			GAS1RR
	SLC43A1			PDK1		KLK10			GATA3
	SLC5A6			PDLIM5		KLK11			GBP1
	SLC7A1			PEX10		KLRK1			GBP2
	SLC7A11			PGLS		KRT14			GBP3
	SMCR8			PHF12		KRT15			GCNT2
	SMIM22			PHF14		KRT17			GFRA1
	SMOC2			KLHL23		KRT19			GGA2
	SMYD3			PICALM		KRT222			GGT7
	SNHG16			PIGW		KRT23			GIPR
	SNHG19			PIK3AP1		KRT5			GJA1
	SNHG3			PIP5K1A		KRT7			GLB1L
	SNHG4			PKIB		L3MBTL4			GLDN
	SNHG8			PLA1A		LAMA3			GLIS3
	SNORA17B			PLA2G16		LAMB3			GLMP
	SNORD77			PLA2G7		LAMP3			GMNN
	C19orf48			PLEKHB1		LARGE1			GMPR
	SNX22			PLEKHS1		LCA5			GNAL
	SOX12			PODXL2		LDB3			GNAZ
	SOX4			POLR1D		LENG8			GNB5
	SPDEF			POPDC3		LGALS3			GNL1
	SPIN4			POSTN		LGALS3BP			GNPTAB
	SRM			PPA2		LGR6			GOLGA8M
	ST14			PPAN		LINC00216			GOSR1
	ST6GALNAC1			PPM1E		LINC00537			GPC1
	STEAP4			PPP1R14B		LINC00844			GPC6
	STIL			PPP1R9A		LINC00937			GPD1L
	STX19			PRAC1		LINC00964			GPM6B
	SULF1			PRC1		LINC00969			GPR161
	SURF6			PRCAT47		DUXAP10			ASB3
	SYNJ2			PRELID3B		LINC01297			GPR87
	SZT2			PRKAA1		LINC01558			GPRASP1
	TARP			PRKAG2-AS1		LIX1			GPRC5B
	TBC1D30			PRMT6		LMAN1L			GPX2
	TBX1			PRR11		LMCD1			GPX3
	TCEB2			PRR15L		LMO2			GREB1
	TCF20			PRR36		LOC100128108			GSTM1
	TCF3			PSD3		SOD2			GSTM2
	TDRD1			PTP4A3		LOC100130232			GSTM3
	TECPR1			PTPRN2		LOC100131541			GSTM4
	TELO2			PUS1		LOC100131581			GSTM5
	THBS4			PXDN		LOC100289090			GSTO2
	THYN1			PXN		ITGB6			GSTP1
	TIMM13			PYCR1		LOC100506990			GTF2IRD2B
	TIMM8B			QTRT2		LOC100507516			HACD1
	TK1			RAB17		CES1			HADHAP1
	TLCD1			RAB30		LOC100653086			HCRP1
	TM7SF2			RAB39B		LOC101927027			HERC1
	TMC5			RAB3B		LOC101928245			HEY1
	TMEM106C			RAB3D		LOC101928429			HGSNAT
	TMEM144			RAB40C		LOC101928461			HHIPL2
	TMEM178A			RABEP2		MED21			HIF3A
	TMEM45B			RACGAP1		LOC101928635			HIVEP2
	TMEM56			RALGAPA2		ALDH1A2			HLA-DOA
	TMTC4			RAP1GAP		LOC101928702			HLA-E
	TOMM40			RAP1GAP2		ABCC6P2			HLF
	TOP2A			RASSF3		LOC102723845			HMCES
	TP53INP1			RCC1		LOC102724951			HMGCLL1
	TRAF7			RELN		PDXDC2P			HMGN4
	TRAM2			REPS2		ANKRD20A1			HOTTIP
	TRIB1			RER1		FAM66D			HOXA7
	TRIB3			REXO2		FAM153A			HOXD10
	TRIM36			RGS10		LOC105369662			HOXD11
	TRIM37			RGS17		LOC105377468			HOXD13
	TRIM68			RHBDD3		LOC114224			HSD11B1
	TRPM4			RNA45S5		LOC441454			HSPB1
	TRPM8			RNF144A		LOC642852			HSPB6
	TSC22D1			RNF144A-AS1		LOC728061			HSPB8
	TSC22D1-AS1			RNF157		LPAR1			HYMAI
	TSPAN1			RNF44		LPAR6			ID1
	TSPAN13			RNFT2		LPCAT2			ID2
	TTLL12			RPL15		LPGAT1			ID2B
	TUBB2A			RPL22L1		LPIN1			ID4
	TUBB2B			RPL29		LRP4			IDH3A
	TWIST1			RPL35A		LRPAP1			IDI1
	UAP1			RPPH1		LRRFIP2			IER3
	UBE2Q1			RPRML		LRRTM2			IFI16
	UQCC3			RPS23		LSAMP			IFITM3
	VARS			RPS24		LSAMP-AS1			IFNLR1
	VASN			RPS29		LSS			IGF1
	VAV2			RRM2		LURAP1			IGFBP5
	VPS13A			RRS1		LXN			IGSF1
	WASF1			RUVBL1		LYST			IL10RB-AS1
	WASF3			SAC3D1		MAATS1			IL1R1
	WDR12			SAMD5		MAF			IL1RL1
	WNK2			SAPCD2		MAGI2			IL6R
	XYLB			SBK1		MAGI2-AS3			INMT
	YEATS4			SCRIB		MALL			INSIG1
	YPEL1			SEL1L3		MAML2			INTS10
	YRDC			SERF1B		MAP1A			IP6K3
	ZBTB7B			SFRP4		MAST4			IPO5P1
	ZDHHC11B			SFTPA2		MBNL2			IQCA1
	ZDHHC23			SH2D4A		MCC			IRF6
	ZFAS1			SH3BGRL3		MECOM			IRS1
	ZIC2			SH3RF1		MED28			IRS2
	ZNF239			SH3RF3		MEG3			ISPD-AS1
	ZNF30			SHCBP1		MEIS2			ITGA2
	ZNF350			SHROOM3		MET			ITGA7
	ZNF511			SIM2		METTL7A			ITGA9
	ZNF577			SKA3		MFSD4B			ITGB4
	ZNF613			SLC12A8		MGST3			ITGB8
	ZNF614			SLC19A1		FADS1			ITIH5
	ZNF615			SLC22A23		MIR205			ITPR1
	ZNF649			SLC25A15		MIR205HG			JADE1
	ZNF765			SLC25A27		MIR23A			JAG2
	ZNF777			SLC25A33		GABRE			JAKMIP1
	ZNF806			SLC25A42		UBA7			JAM3
	ZSCAN12			SLC27A2		PER1			JAZF1
	ZSCAN16			SLC29A2		MKL2			JAZF1-AS1
				SLC35F6		MLLT10			JPH2
				SLC43A1		MME			JPH4
				SLC45A2		MMP19			KANK4
				SLC5A6		MPPED2			KANSL1L
				SLC7A1		MPZL2			KAT6A
				SLC7A11		MR1			KCNAB1
				SLIT1		MSMB			KCNJ3
				SMCR8		MSMO1			KCNJ8
				SMIM22		MTSS1			KCNK3
				SMKR1		MUC20			KCNMA1
				SMOC2		MUC3			KCNMB1
				SMPDL3B		MUC3A			KCNQ5
				SMYD3		MUC4			KDR
				SNHG16		MYOF			KIAA0319
				SNHG19		MYZAP			KIAA1210
				SNHG3		N4BP2L2			KIF1A
				SNHG4		NAB1			KIF5C
				SNHG8		NAMPT			KIT
				SNORA17B		NARR			KITLG
				SNORD77		NASP			KLF10
				SNORD88C		NAV2			KLF8
				SNX22		NAV3			KLHL15
				SOX12		NBL1			KLK1
				SOX4		NDEL1			KLK10
				SPC25		NDNF			KLK11
				SPDEF		NDRG2			KLRK1
				SPIN4		NDRG3			KRBOX1
				SRM		KCTD14			KRT13
				ST14		NECTIN1			KRT14
				ST6GALNAC1		NEDD9			KRT15
				STEAP4		NEFH			KRT17
				STIL		NELL1			KRT19
				STX19		NELL2			KRT222
				SULF1		NFIA			KRT23
				SURF6		NHS			KRT5
				SV2C		NINL			KRT7
				SYNJ2		NIPAL3			L3MBTL4
				SZT2		NME7			LAMA3
				TARP		NMRK1			LAMB3
				TBC1D30		NPR2			LAMB4
				TBL1XR1		NPTN-IT1			LAMP3
				TBX1		NR3C1			LAPTM4B
				TCEB2		NR4A3			LARGE1
				TCF20		NRG1			LCA5
				TCF3		NRXN3			LCN2
				TDRD1		NSG1			LDAH
				TECPR1		NTAN1			LDB3
				TELO2		NTN4			LDLR
				TFF3		NTNG2			LENG8
				TGM3		NTRK3			LGALS3
				THBS2		NUAK1			LGALS3BP
				THBS4		NUDT10			LGR6
				THYN1		OAT			LINC00092
				TIMM13		OBSCN			LINC00216
				TIMM8B		OGN			LINC00261
				TK1		OSBPL6			LINC00293
				TLCD1		P3H2			LINC00515
				TM7SF2		PADI2			LINC00537
				TMC5		PAK1			LINC00844
				TMEFF2		PAK1IP1			LINC00937
				TMEM106C		PALD1			LINC00960
				TMEM132A		PALLD			LINC00964
				TMEM144		PALMD			LINC00969
				TMEM178A		PANK2			LINC01139
				TMEM45B		PAPPA			DUXAP10
				TMEM56		PAQR3			LINC01297
				TMSB15A		PAQR7			LINC01451
				TMTC4		PAQR8			LINC01558
				TOMM40		PARM1			LIPG
				TOP2A		PARP6			LIX1
				TP53INP1		PCAT4			LMAN1L
				TPX2		PCDH18			LMCD1
				TRAF7		PCDH7			LMO2
				TRAM2		PCDH9			LMO4
				TRIB1		PCNP			LMOD1
				TRIB3		PCP4L1			LOC100128108
				TRIM36		PCSK7			SOD2
				TRIM37		PDE10A			LOC100130232
				TRIM68		PDE11A			LOC100131541
				TRIP13		PDE4B			LOC100131581
				TRPM4		PDE4D			LOC100288911
				TRPM8		PDE8B			LOC100289090
				TSC22D1		PDGFC			LOC100505851
				TSC22D1-AS1		PDK3			ITGB6
				TSPAN1		PDK4			LOC100506990
				TSPAN13		PDLIM1			LOC100507516
				TTLL12		PDLIM5			LOC100507557
				TUBB2A		PDPN			CES1
				TWIST1		PDXDC1			LOC100653086
				TXLNB		PDZD8			LOC100996579
				TYMS		PEBP4			LOC101927027
				UAP1		PEG10			LOC101927499
				UBE2C		PEG3-AS1			LOC101928245
				UBE2Q1		PELI1			LOC101928429
				UHRF1		PENK			LOC101928461
				UNC80		PER2			MED21
				UQCC3		PERP			LOC101928635
				VARS		PGAP1			LOC101928702
				VASN		PGM5			LOC101928731
				VAV2		PGM5-AS1			ABCC6
				VAX2		PGR			ABCC6P2
				VCAN		PHGDH			STRC
				VPS13A		PHLDA1			LOC102723845
				VSTM2L		PHYHIPL			LOC102724951
				WASF1		PI15			PDXDC2P
				WASF3		PIK3R1			ANKRD20A4
				WDR12		PJA1			FAM66D
				WNK2		PKNOX2			FAM153A
				XYLB		PKP1			LOC105369662
				YEATS4		PLAC4			LOC105377468
				YPEL1		PLAGL1			FLJ45482
				YRDC		PLCL1			LOC114224
				ZBTB7B		PLEKHG4B			LOC441454
				ZDHHC11B		PLEKHH2			LOC642426
				ZDHHC23		PLG			LOC642852
				ZFAS1		PLP2			LOC654780
				ZIC2		PLPP3			LOC728061
				ZNF239		PNMAL1			LOC729970
				ZNF30		POF1B			LPAR1
				ZNF350		POLR2J4			LPAR6
				ZNF367		PPARD			LPCAT2
				ZNF511		PPARGC1A			LPGAT1
				ZNF577		PPM1K			LPIN1
				ZNF613		PPM1L			LPP
				ZNF614		PPP1R3B			LRCH2
				ZNF615		PPP1R3C			LRP4
				ZNF649		PPP3CC			LRPAP1
				ZNF765		PPP6R2			LRRFIP2
				ZNF777		PRDM8			LRRTM2
				ZNF806		PRELID2			LSAMP
				ZSCAN12		PRIMA1			LSAMP-AS1
				ZSCAN16		PRKCA			LSM11
						PRO1082			LSS
						PROK1			LURAP1
						PROM1			LXN
						PRRG4			LY6G6F
						PRSS21			LYST
						PSEN1			MAATS1
						PSIP1			MAF
						PTEN			MAGI2
						PTGDS			MAGI2-AS3
						PTGS1			MAL
						PTGS2			MALL
						PTN			MAMDC2
						PTPN14			MAML2
						PTRF			MAMLD1
						QKI			MAP1A
						QPRT			MAP1B
						RAB6A			MAP1LC3A
						RABGAP1			MAST4
						RAD51B			MBNL1-AS1
						RBBP8			MBNL2
						RBMS1			MCC
						RBMS2			MDFIC
						RBMS3			ME1
						RBMXL1			MECOM
						RBP7			MED28
						RBPMS			MEG3
						RCAN3			MEIS2
						RECQL4			MET
						RGCC			METTL7A
						RGN			MFSD4B
						RGS12			MGST3
						RHBDD1			MIR133A1HG
						RHOB			MIR155
						RHOC			FADS1
						RHOJ			MIR205
						RMST			MIR205HG
						RNASE4			MIR24-2
						RND3			MIR452
						RNF180			MIR5193
						RNF39			MCAM
						RNF40			PER1
						ROBO1			MKL2
						ROBO3			MLLT10
						ROR2			MME
						RORA			MMP19
						S100A16			MN1
						S100A2			MOB1A
						S100A4			MPP2
						S100A6			MPPED2
						S1PR3			MPZL2
						S1PR5			MR1
						SAMD12			MSMB
						SAMD8			MSMO1
						SAMD9			MSRB3
						SAMHD1			MT1G
						SART1			MTSS1
						SCARA3			MUC20
						SCD5			MUC3
						SCGB1A1			MUC3A
						SCGB2A1			MUC3B
						SCML1			MUC4
						SCN4B			MYH11
						SCN7A			MYL9
						SCUBE2			MYLK
						SCUBE3			MYOCD
						SDC1			MYOF
						SELE			MYZAP
						SEMA6D			N4BP2L2
						SERPINB1			NAB1
						SERPINB11			NAMPT
						SERPINB5			NARR
						SERPINB9			NASP
						SERPINF1			NAT1
						SF1			NAV2
						SFMBT2			NAV3
						SFN			NBL1
						SFXN3			NCS1
						SGCB			NDE1
						SH3BGRL2			NDEL1
						SH3GL1P2			NDNF
						SHROOM4			NDP
						SIK1			NDRG2
						SKIDA1			NDRG3
						SKIL			KCTD14
						SLC14A1			NECTIN1
						SLC15A1			NEDD9
						SLC16A5			NEFH
						SLC18A2			NELL1
						SLC22A17			NELL2
						SLC25A18			NFIA
						SLC29A4			NHS
						SLC2A14			NID1
						SLC2A5			NINL
						SLC40A1			NIPAL3
						SLC4A11			NKD1
						SLC6A13			NME7
						SLC6A6			NMRK1
						SLCO2A1			NPR2
						SLCO3A1			NPTN-IT1
						SLIT2			NR3C1
						SLITRK6			NR4A3
						SMARCD3			NRG1
						SMC1A			NRK
						SMC5			NRP2
						SMIM10L2B			NRXN1
						SMOC1			NRXN3
						SMYD4			NSG1
						SNAI2			NTAN1
						SNAPC1			NTN1
						SNCAIP			NTN4
						SNX19			NTNG2
						SNX24			NTRK2
						SNX7			NTRK3
						SOCS3			NUAK1
						SOD3			NUDT10
						SORD			NYNRIN
						SOS2			OAT
						SOX5			OBSCN
						SOX7			ODAM
						SP140L			OGN
						SP8			OLFM4
						SPAG8			OLFML2A
						SPATA2			OSBPL6
						SPATA6			P2RY1
						SPATS2L			P3H2
						SPG20			PADI2
						SPOCK3			PAGE4
						SPON1			PAK1
						SPRY1			PAK1IP1
						SPRY2			PAK3
						SPRY4-IT1			PALD1
						SPTAN1			PALLD
						SRD5A2			PALMD
						SRGAP3			PANK2
						SRSF3			PAPPA
						SSBP2			PAQR3
						SSX2IP			PAQR7
						ST3GAL5			PAQR8
						ST3GAL6			PARM1
						ST6GALNAC2			PARP6
						STAT3			PCAT4
						STC1			PCDH10
						STEAP3			PCDH18
						STK17A			PCDH7
						STOM			PCDH9
						STON2			PCNP
						STOX2			PCP4
						STS			PCP4L1
						SULT2B1			PCSK7
						SUPT3H			PCYT1B
						SV2B			PDE10A
						SYMPK			PDE11A
						SYNE2			PDE4A
						SYNGR1			PDE4B
						SYT9			PDE4D
						SYTL4			PDE8B
						TAF11			PDGFC
						TARP			PDK3
						TBC1D1			PDK4
						TBX3			PDLIM1
						TCEAL2			PDLIM5
						TCF7L1			PDPN
						TCF7L2			PDXDC1
						TEAD1			PDZD8
						TF			PDZRN4
						TFCP2L1			PEBP4
						TFRC			PEG10
						TGFB2			PEG3-AS1
						TGFB3			PELI1
						TGFBR1			PENK
						TGFBR3			PER2
						TGIF1			PERP
						THRAP3			PGAP1
						THSD4			PGM5
						TLE2			PGM5-AS1
						TM7SF3			PGR
						TMEM165			PHGDH
						TMEM173			PHLDA1
						TMEM237			PHYHIP
						TMEM246			PHYHIPL
						TMEM252			PI15
						TMLHE			PIK3R1
						TMSB15B			PIP5K1B
						TNC			PJA1
						TNFRSF10B			PKNOX2
						TNFRSF25			PKP1
						TNS1			PLAC4
						TNS4			PLAC9
						TP63			PLAGL1
						TPM4			PLCL1
						TPRG1			PLD5
						TRAF3IP2			PLEK2
						TRERF1			PLEKHG4B
						TRG-AS1			PLEKHH2
						TRIM2			PLG
						TRIM29			PLN
						TRIM38			PLP2
						TRIM78P			PLPP3
						TRPC1			PMP22
						TRPS1			PNCK
						TSC22D3			PNMAL1
						TSHZ3			POF1B
						TSPAN18			POLR2J4
						TSPYL2			PON3
						TTBK2			POPDC2
						TTC22			PPARD
						TTLL7			PPARGC1A
						TUBA4A			PPM1K
						TUBE1			PPM1L
						TXNL1			PPP1R14A
						UBE2B			PPP1R14C
						UBE2Q2L			PPP1R3B
						UBXN10-AS1			PPP1R3C
						UNC5B			PPP3CC
						UPK1A			PPP6R2
						URB1			PRDM5
						USP31			PRDM6
						VAV3			PRDM8
						VEGFA			PRELID2
						VSNL1			PRIMA1
						VSTM4			PRKCA
						VWA5A			PRKCB
						WBSCR17			PRKG1
						WDR1			PRO1082
						WDR41			PROK1
						WFDC2			PROM1
						WIF1			PRRG4
						WIPF3			PRRX1
						WSB1			PRSS21
						XAF1			PRTFDC1
						XPNPEP1			PSEN1
						ZAK			PSIP1
						ZBTB20			PSMD5
						ZDHHC14			PTCHD1
						ZDHHC2			PTEN
						ZDHHC8P1			PTGDS
						ZEB2			PTGER2
						ZFAND5			PTGER3
						ZFAND6			PTGIS
						ZFP36L2			PTGS1
						ZHX2			PTGS2
						ZNF10			PTN
						ZNF185			PTPN14
						ZNF204P			PTRF
						ZNF214			PTX3
						ZNF334			PURA
						ZNF394			QKI
						ZNF407			QPRT
						ZNF440			RAB40A
						ZNF483			RAB6A
						ZNF532			RAB9B
						ZNF655			RABGAP1
						ZNF711			RAD51B
						ZNF75D			RAP1A
						ZNF789			RARRES1
						ZNF81			RARRES2
						ZNF814			RASL12
						ZNF827			RASSF8-AS1
						ZNRF1			RAVER2
									RBBP8
									RBFOX2
									RBFOX3
									RBMS1
									RBMS2
									RBMS3
									RBMXL1
									RBP1
									RBP7
									RBPMS
									RBPMS2
									RCAN1
									RCAN3
									RECQL4
									RFPL1
									RGCC
									RGN
									RGS12
									RGS7BP
									RHBDD1
									RHOB
									RHOC
									RHOJ
									RMST
									RNASE4
									RND3
									RNF128
									RNF180
									RNF39
									RNF40
									ROBO1
									ROBO3
									ROR2
									RORA
									RPE65
									RPL39L
									RPRD1A
									RPRM
									RRAS
									S100A16
									S100A2
									S100A4
									S100A6
									S1PR3
									S1PR5
									SAMD12
									SAMD8
									SAMD9
									SAMHD1
									SART1
									SBSPON
									SCARA3
									SCD5
									SCGB1A1
									SCGB2A1
									SCGB3A1
									SCML1
									SCN4B
									SCN7A
									SCPEP1
									SCRN1
									SCUBE2
									SCUBE3
									SDC1
									SDC2
									SDC4
									SDPR
									SEC14L2
									SELE
									SEMA6D
									SERPINB1
									SERPINB11
									SERPINB5
									SERPINB9
									SERPINF1
									SF1
									SFMBT2
									SFN
									SFXN3
									SGCB
									SGCD
									SGCE
									SGCG
									SH3BGRL2
									SH3GL1P2
									SH3PXD2B
									SHISA9
									SHROOM1
									SHROOM4
									SIDT1
									SIK1
									SKIDA1
									SKIL
									SLC14A1
									SLC15A1
									SLC16A2
									SLC16A5
									SLC18A2
									SLC22A17
									SLC24A3
									SLC25A18
									SLC25A4
									SLC29A4
									SLC2A14///SLC2A3
									SLC2A5
									SLC39A2
									SLC40A1
									SLC47A1
									SLC4A11
									SLC6A13
									SLC6A6
									SLC7A8
									SLC8A1
									SLCO2A1
									SLCO3A1
									SLIT2
									SLITRK6
									SLMAP
									SMARCD3
									SMC1A
									SMC5
									SMIM10L2B
									SMIM2
									SMOC1
									SMTN
									SMYD4
									SNAI2
									SNAPC1
									SNCAIP
									SNHG18
									SNX19
									SNX24
									SNX7
									SOCS3
									SOD3
									SORBS1
									SORBS2
									SORD
									SOS2
									SOWAHA
									SOX15
									SOX21-AS1
									SOX5
									SOX7
									SP140L
									SP8
									SPAG8
									SPATA2
									SPATA6
									SPATS2L
									SPG20
									SPOCK3
									SPON1
									SPRED1
									SPRY1
									SPRY2
									SPRY4-IT1
									SPTAN1
									SRD5A2
									SRGAP3
									SRPX
									SRSF3
									SSBP2
									SSX2IP
									ST3GAL5
									ST3GAL6
									ST6GALNAC2
									ST8SIA1
									STAC
									STARD4
									STAT3
									STC1
									STEAP3
									STK17A
									STOM
									STON2
									STOX2
									STS
									STXBP5L
									SULT2B1
									SUPT3H
									SUSD4
									SV2B
									SVIL
									SYMPK
									SYNE2
									SYNGR1
									SYNM
									SYNPO2
									SYT16
									SYT9
									SYTL4
									TACC1
									TAF11
									TAGLN
									TARP
									TBC1D1
									TBL1X
									TBX3
									TBXA2R
									TCEAL2
									TCF7L1
									TCF7L2
									TEAD1
									TF
									TFCP2L1
									TFRC
									TGFB2
									TGFB3
									TGFBR1
									TGFBR3
									TGIF1
									TGM4
									THRAP3
									THSD4
									TIMP3
									TIMP4
									TLE2
									TLR3
									TM7SF3
									TMEM158
									TMEM165
									TMEM173
									TMEM198B
									TMEM237
									TMEM246
									TMEM252
									TMEM35A
									TMEM47
									TMLHE
									TMSB15B
									TNC
									TNFRSF10B
									TNFRSF25
									TNFSF13
									TNS1
									TNS4
									TP63
									TPM1
									TPM2
									TPM4
									TPRG1
									TRAF3IP2
									TRERF1
									TRG-AS1
									TRIM2
									TRIM29
									TRIM38
									TRIM6
									TRIM78P
									TRIP6
									TRNP1
									TRPC1
									TRPS1
									TSC22D3
									TSHZ3
									TSLP
									TSPAN18
									TSPAN2
									TSPYL2
									TTBK2
									TTC22
									TTLL7
									TUBA4A
									TUBE1
									TXNL1
									UBE2B
									UBE2Q2L
									UBE2QL1
									UBXN10
									UBXN10-AS1
									UNC5B
									UNC5D
									UNC80
									UPK1A
									URB1
									USP31
									VAV3
									VCL
									VEGFA
									VIT
									VSIG2
									VSNL1
									VSTM4
									VWA5A
									WBSCR17
									WDR1
									WDR41
									WFDC1
									WFDC2
									WIF1
									WIPF3
									WSB1
									XAF1
									XPNPEP1
									YBX2
									ZAK
									ZBTB20
									ZDHHC14
									ZDHHC2
									ZDHHC8P1
									ZEB2
									ZFAND5
									ZFAND6
									ZFP36L2
									ZHX2
									ZNF10
									ZNF185
									ZNF204P
									ZNF214
									ZNF334
									ZNF394
									ZNF407
									ZNF440
									ZNF483
									ZNF516
									ZNF532
									ZNF655
									ZNF702P
									ZNF711
									ZNF750
									ZNF75D
									ZNF789
									ZNF81
									ZNF814
									ZNF827
									ZNRF1
