# Supplementary material for: Identification of Potential Key Genes in Prostate Cancer with Gene Expression, Pivotal Pathways and Regulatory Networks Analysis Using Integrated Bioinformatics Methods
Source: MDPI journal article supplement (doi:10.3390/genes13040655), 2022-04-07
Supplement: s1 [file Supplimentary file S 13.xlsx]

## Sheet: Sheet1
Term	P-value	Adjusted P-value	Genes	Term	P-value	Adjusted P-value	Genes	Term	P-value	Adjusted P-value	Genes	Term	P-value	Adjusted P-value	Genes
hsa-miR-574-3p	0.00124997	0.0107798	EGFR	hsa-miR-516a-5p	0.000899979	0.0155645	MYC	hsa-miR-598-5p	0.000549985	0.0180946	VEGFA	hsa-miR-518c-3p	0.000699982	0.0107998	PTEN
hsa-miR-542-5p	0.00169997	0.0107798	EGFR	hsa-miR-8074	0.000949978	0.0155645	MYC	hsa-miR-718	0.000749981	0.0180946	VEGFA	hsa-miR-718	0.000749981	0.0107998	PTEN
hsa-miR-133a-5p	0.00214996	0.0107798	EGFR	hsa-miR-487b-3p	0.000999977	0.0155645	MYC	hsa-miR-4497	0.00209996	0.0180946	VEGFA	hsa-miR-494-5p	0.00139997	0.0107998	PTEN
hsa-miR-875-5p	0.00219996	0.0107798	EGFR	hsa-miR-451a	0.00154997	0.0155645	MYC	hsa-miR-6793-5p	0.00244996	0.0180946	VEGFA	hsa-miR-4791	0.00189996	0.0114748	PTEN
hsa-miR-27a-5p	0.00224996	0.0107798	EGFR	hsa-miR-371a-3p	0.00159997	0.0155645	MYC	hsa-miR-1-5p	0.00269995	0.0180946	VEGFA	hsa-miR-3144-3p	0.00199996	0.0114748	PTEN
hsa-miR-219a-5p	0.00229996	0.0107798	EGFR	hsa-miR-889-5p	0.00259996	0.0155645	MYC	hsa-miR-6759-5p	0.00279995	0.0180946	VEGFA	hsa-miR-3201	0.00199996	0.0114748	PTEN
hsa-miR-1-5p	0.00269995	0.0107998	EGFR	hsa-miR-184	0.00269995	0.0155645	MYC	hsa-miR-126-3p	0.00289995	0.0180946	VEGFA	hsa-miR-6826-5p	0.00204996	0.0114748	PTEN
hsa-miR-2861	0.00339995	0.0124665	EGFR	hsa-miR-129-2-3p	0.00354995	0.0155645	MYC	hsa-miR-5682	0.00319995	0.0180946	VEGFA	hsa-miR-652-5p	0.00209996	0.0114748	PTEN
hsa-miR-133b	0.00419994	0.0142152	EGFR	hsa-miR-4289	0.00364995	0.0155645	MYC	hsa-miR-101-5p	0.00334995	0.0180946	VEGFA	hsa-miR-492	0.00224996	0.0114748	PTEN
hsa-miR-135a-5p	0.00469994	0.0147712	EGFR	hsa-miR-4677-3p	0.00369994	0.0155645	MYC	hsa-miR-942-3p	0.00344995	0.0180946	VEGFA	hsa-miR-200c-5p	0.00249996	0.0114748	PTEN
hsa-miR-146b-5p	0.00604992	0.0177464	EGFR	hsa-miR-323a-3p	0.00374994	0.0155645	MYC	hsa-miR-299-3p	0.00354995	0.0180946	VEGFA	hsa-miR-889-5p	0.00259996	0.0114748	PTEN
hsa-miR-133a-3p	0.00654992	0.0180123	EGFR	hsa-miR-151a-5p	0.00389994	0.0155645	MYC	hsa-miR-568	0.00364995	0.0180946	VEGFA	hsa-miR-638	0.00264996	0.0114748	PTEN
hsa-miR-137	0.00744991	0.0180189	EGFR	hsa-miR-34a-3p	0.00404994	0.0155645	MYC	hsa-miR-296-5p	0.00369994	0.0180946	VEGFA	hsa-miR-200a-5p	0.00269995	0.0114748	PTEN
hsa-miR-200a-3p	0.00754991	0.0180189	EGFR	hsa-miR-135b-5p	0.00414994	0.0155645	MYC	hsa-miR-6870-3p	0.00369994	0.0180946	VEGFA	hsa-miR-370-5p	0.00289995	0.0114748	PTEN
hsa-miR-3622b-5p	0.00854991	0.0180189	EGFR	hsa-miR-148a-5p	0.00424994	0.0155645	MYC	hsa-miR-4263	0.00469994	0.0180946	VEGFA	hsa-miR-26a-2-3p	0.00294995	0.0114748	PTEN
hsa-miR-491-5p	0.00859991	0.0180189	EGFR	hsa-miR-16-2-3p	0.00424994	0.0155645	MYC	hsa-miR-6871-3p	0.00479993	0.0180946	VEGFA	hsa-miR-1287-5p	0.00304995	0.0114748	PTEN
hsa-miR-7-1-3p	0.0091999	0.0183998	EGFR	hsa-miR-3159	0.00439994	0.0155645	MYC	hsa-miR-374b-3p	0.00484993	0.0180946	VEGFA	hsa-miR-190b	0.00309995	0.0114748	PTEN
hsa-miR-146a-5p	0.0100499	0.0192259	EGFR	hsa-miR-92a-1-5p	0.00454994	0.0155645	MYC	hsa-miR-670-5p	0.00494993	0.0180946	VEGFA	hsa-miR-486-5p	0.00334995	0.0114748	PTEN
hsa-miR-145-5p	0.0118999	0.0218165	EGFR	hsa-miR-4699-3p	0.00459994	0.0155645	MYC	hsa-miR-140-5p	0.00499993	0.0180946	VEGFA	hsa-miR-4653-3p	0.00334995	0.0114748	PTEN
hsa-miR-132-3p	0.0127499	0.0224398	EGFR	hsa-miR-586	0.00464994	0.0155645	MYC	hsa-miR-16-1-3p	0.00499993	0.0180946	VEGFA	hsa-miR-155-3p	0.00339995	0.0114748	PTEN
hsa-miR-125a-5p	0.0133999	0.0226767	EGFR	hsa-miR-212-3p	0.00469994	0.0155645	MYC	hsa-miR-134-5p	0.00504993	0.0180946	VEGFA	hsa-miR-301a-5p	0.00339995	0.0114748	PTEN
hsa-miR-301b-3p	0.0187499	0.0294641	EGFR	hsa-miR-135a-5p	0.00469994	0.0155645	MYC	hsa-miR-576-5p	0.00504993	0.0180946	VEGFA	hsa-miR-376a-5p	0.00349995	0.0114748	PTEN
hsa-miR-27b-3p	0.0210499	0.0297645	EGFR	hsa-miR-195-3p	0.00474994	0.0155645	MYC	hsa-miR-504-5p	0.00539993	0.0180946	VEGFA	hsa-miR-26a-1-3p	0.00354995	0.0114748	PTEN
hsa-miR-27a-3p	0.0214498	0.0297645	EGFR	hsa-miR-6765-5p	0.00489993	0.0155645	MYC	hsa-miR-3126-5p	0.00549993	0.0180946	VEGFA	hsa-miR-6512-5p	0.00354995	0.0114748	PTEN
hsa-miR-125b-5p	0.0214998	0.0297645	EGFR	hsa-miR-548au-3p	0.00489993	0.0155645	MYC	hsa-miR-6875-5p	0.00549993	0.0180946	VEGFA	hsa-miR-106b-3p	0.00379994	0.0114748	PTEN
hsa-miR-520e	0.0226498	0.0297645	EGFR	hsa-miR-4432	0.00489993	0.0155645	MYC	hsa-miR-383-5p	0.00554993	0.0180946	VEGFA	hsa-miR-217	0.00399994	0.0114748	PTEN
hsa-miR-520b	0.0227498	0.0297645	EGFR	hsa-miR-4647	0.00494993	0.0155645	MYC	hsa-miR-199a-3p	0.00569993	0.0180946	VEGFA	hsa-miR-34a-3p	0.00404994	0.0114748	PTEN
hsa-miR-302b-3p	0.0229998	0.0297645	EGFR	hsa-miR-4426	0.00494993	0.0155645	MYC	hsa-miR-126-5p	0.00594993	0.0180946	VEGFA	hsa-miR-21-3p	0.00414994	0.0114748	PTEN
hsa-miR-128-3p	0.0263498	0.0331255	EGFR	hsa-miR-4662b	0.00494993	0.0155645	MYC	hsa-miR-6748-5p	0.00599993	0.0180946	VEGFA	hsa-miR-6074	0.00419994	0.0114748	PTEN
hsa-miR-7-5p	0.0288498	0.0352609	EGFR	hsa-miR-33b-5p	0.00504993	0.0155645	MYC	hsa-miR-206	0.00609992	0.0180946	VEGFA	hsa-miR-6842-3p	0.00424994	0.0114748	PTEN
hsa-miR-122-5p	0.0304998	0.0353735	EGFR	hsa-miR-19b-2-5p	0.00529993	0.0155645	MYC	hsa-miR-5694	0.00609992	0.0180946	VEGFA	hsa-miR-153-3p	0.00424994	0.0114748	PTEN
hsa-miR-21-5p	0.0305498	0.0353735	EGFR	hsa-miR-6507-3p	0.00529993	0.0155645	MYC	hsa-miR-95-5p	0.00639992	0.0180946	VEGFA	hsa-miR-4272	0.00434994	0.0115523	PTEN
hsa-let-7a-5p	0.0319498	0.036046	EGFR	hsa-miR-622	0.00534993	0.0155645	MYC	hsa-miR-133a-3p	0.00654992	0.0180946	VEGFA	hsa-miR-92a-1-5p	0.00454994	0.0118284	PTEN
hsa-miR-30a-5p	0.0366498	0.0403148	EGFR	hsa-miR-4316	0.00534993	0.0155645	MYC	hsa-miR-4483	0.00659992	0.0180946	VEGFA	hsa-miR-20a-3p	0.00459994	0.0118284	PTEN
hsa-miR-218-5p	0.0407498	0.0437315	EGFR	hsa-miR-2682-5p	0.00549993	0.0155645	MYC	hsa-miR-1293	0.00674992	0.0180946	VEGFA	hsa-miR-548av-3p	0.00479993	0.0121498	PTEN
hsa-miR-155-5p	0.0451498	0.0470696	EGFR	hsa-miR-599	0.00554993	0.0155645	MYC	hsa-miR-141-5p	0.00679992	0.0180946	VEGFA	hsa-miR-29a-5p	0.00489993	0.0122121	PTEN
hsa-miR-1-3p	0.0459998	0.0470696	EGFR	hsa-miR-514b-5p	0.00564993	0.0155645	MYC	hsa-miR-205-3p	0.00709992	0.0180946	VEGFA	hsa-miR-7853-5p	0.00504993	0.0123953	PTEN
				hsa-miR-1294	0.00564993	0.0155645	MYC	hsa-miR-330-3p	0.00729992	0.0180946	VEGFA	hsa-miR-105-5p	0.00534993	0.0126781	PTEN
				hsa-miR-19b-1-5p	0.00564993	0.0155645	MYC	hsa-miR-147a	0.00744991	0.0180946	VEGFA	hsa-miR-543	0.00534993	0.0126781	PTEN
				hsa-miR-513c-5p	0.00564993	0.0155645	MYC	hsa-miR-451b	0.00749991	0.0180946	VEGFA	hsa-miR-382-5p	0.00554993	0.0128441	PTEN
				hsa-miR-449c-5p	0.00564993	0.0155645	MYC	hsa-miR-429	0.00754991	0.0180946	VEGFA	hsa-miR-216b-3p	0.00584993	0.0133477	PTEN
				hsa-miR-126-5p	0.00594993	0.0155645	MYC	hsa-miR-4719	0.00764991	0.0180946	VEGFA	hsa-miR-193a-3p	0.00639992	0.0141478	PTEN
				hsa-miR-3157-5p	0.00604992	0.0155645	MYC	hsa-miR-1252-3p	0.00779991	0.0180946	VEGFA	hsa-miR-4328	0.00639992	0.0141478	PTEN
				hsa-miR-34b-5p	0.00614992	0.0155645	MYC	hsa-miR-361-5p	0.00799991	0.0180946	VEGFA	hsa-miR-3653-3p	0.00649992	0.0141478	PTEN
				hsa-miR-4691-3p	0.00614992	0.0155645	MYC	hsa-miR-6769a-5p	0.00809991	0.0180946	VEGFA	hsa-miR-130a-5p	0.00654992	0.0141478	PTEN
				hsa-miR-655-5p	0.00619992	0.0155645	MYC	hsa-miR-369-3p	0.00814991	0.0180946	VEGFA	hsa-miR-7856-5p	0.00674992	0.014388	PTEN
				hsa-miR-302a-5p	0.00629992	0.0155645	MYC	hsa-miR-199a-5p	0.00829991	0.0180946	VEGFA	hsa-miR-494-3p	0.00689992	0.0143892	PTEN
				hsa-miR-4762-5p	0.00644992	0.0156287	MYC	hsa-miR-378a-3p	0.00829991	0.0180946	VEGFA	hsa-miR-425-5p	0.00719992	0.0143892	PTEN
				hsa-miR-1304-5p	0.00674992	0.0158071	MYC	hsa-miR-6769b-5p	0.00839991	0.0180946	VEGFA	hsa-miR-141-3p	0.00724992	0.0143892	PTEN
				hsa-miR-512-5p	0.00679992	0.0158071	MYC	hsa-miR-5688	0.00849991	0.0180946	VEGFA	hsa-miR-3658	0.00749991	0.0143892	PTEN
				hsa-miR-494-3p	0.00689992	0.0158071	MYC	hsa-miR-7-2-3p	0.00854991	0.0180946	VEGFA	hsa-miR-429	0.00754991	0.0143892	PTEN
				hsa-miR-561-3p	0.00704992	0.0158623	MYC	hsa-miR-5692c	0.00869991	0.0180946	VEGFA	hsa-miR-200a-3p	0.00754991	0.0143892	PTEN
				hsa-miR-320b	0.00724992	0.0160261	MYC	hsa-miR-5692b	0.00869991	0.0180946	VEGFA	hsa-miR-3671	0.00774991	0.0145987	PTEN
				hsa-miR-196b-5p	0.00749991	0.0160891	MYC	hsa-miR-4735-5p	0.0089999	0.0180946	VEGFA	hsa-miR-152-3p	0.00789991	0.0147102	PTEN
				hsa-miR-429	0.00754991	0.0160891	MYC	hsa-miR-205-5p	0.0090499	0.0180946	VEGFA	hsa-miR-216a-5p	0.00804991	0.0148192	PTEN
				hsa-miR-30d-3p	0.00799991	0.0160891	MYC	hsa-miR-495-3p	0.0091999	0.0180946	VEGFA	hsa-miR-22-3p	0.00814991	0.0148347	PTEN
				hsa-miR-3919	0.00804991	0.0160891	MYC	hsa-miR-7-1-3p	0.0091999	0.0180946	VEGFA	hsa-miR-520d-5p	0.00824991	0.0148498	PTEN
				hsa-miR-449a	0.00804991	0.0160891	MYC	hsa-miR-200b-3p	0.0092999	0.0180946	VEGFA	hsa-miR-524-5p	0.00859991	0.0150427	PTEN
				hsa-miR-1248	0.00814991	0.0160891	MYC	hsa-miR-6745	0.0093999	0.0180946	VEGFA	hsa-miR-17-3p	0.00864991	0.0150427	PTEN
				hsa-miR-5197-5p	0.00824991	0.0160891	MYC	hsa-miR-567	0.0094499	0.0180946	VEGFA	hsa-miR-548as-3p	0.00864991	0.0150427	PTEN
				hsa-miR-378a-3p	0.00829991	0.0160891	MYC	hsa-miR-4524a-5p	0.0094499	0.0180946	VEGFA	hsa-miR-182-5p	0.00894991	0.0150427	PTEN
				hsa-miR-34c-5p	0.00869991	0.016361	MYC	hsa-miR-4524b-5p	0.0094499	0.0180946	VEGFA	hsa-miR-4505	0.0090499	0.0150427	PTEN
				hsa-miR-30e-3p	0.00869991	0.016361	MYC	hsa-miR-297	0.0094999	0.0180946	VEGFA	hsa-miR-205-5p	0.0090499	0.0150427	PTEN
				hsa-miR-33a-5p	0.00894991	0.0165836	MYC	hsa-miR-363-5p	0.0095499	0.0180946	VEGFA	hsa-miR-106a-3p	0.0090999	0.0150427	PTEN
				hsa-miR-3133	0.0094499	0.0172563	MYC	hsa-miR-3646	0.0099999	0.018646	VEGFA	hsa-miR-5787	0.0090999	0.0150427	PTEN
				hsa-miR-30a-3p	0.0096999	0.0174598	MYC	hsa-miR-34b-3p	0.0100999	0.018646	VEGFA	hsa-miR-214-3p	0.0102999	0.0167668	PTEN
				hsa-miR-34b-3p	0.0100999	0.0179238	MYC	hsa-miR-6873-5p	0.0102999	0.0187745	VEGFA	hsa-miR-1250-3p	0.0103499	0.0167668	PTEN
				hsa-miR-25-5p	0.0104499	0.0182187	MYC	hsa-miR-200c-3p	0.0106999	0.0192598	VEGFA	hsa-miR-144-3p	0.0104999	0.016829	PTEN
				hsa-miR-148a-3p	0.0106499	0.0182187	MYC	hsa-miR-423-3p	0.0114499	0.0198781	VEGFA	hsa-miR-200c-3p	0.0106999	0.016829	PTEN
				hsa-miR-4797-5p	0.0106999	0.0182187	MYC	hsa-miR-374b-5p	0.0116999	0.0198781	VEGFA	hsa-miR-142-5p	0.0112499	0.0175239	PTEN
				hsa-miR-145-5p	0.0118999	0.0199918	MYC	hsa-miR-145-5p	0.0118999	0.0198781	VEGFA	hsa-miR-607	0.0115499	0.0178198	PTEN
				hsa-miR-92a-2-5p	0.0123499	0.0201114	MYC	hsa-miR-3924	0.0120499	0.0198781	VEGFA	hsa-miR-744-3p	0.0117999	0.0180338	PTEN
				hsa-miR-23a-3p	0.0124499	0.0201114	MYC	hsa-miR-6756-5p	0.0123499	0.0198781	VEGFA	hsa-miR-23a-3p	0.0124499	0.0188494	PTEN
				hsa-miR-29b-3p	0.0130499	0.0207898	MYC	hsa-miR-6766-5p	0.0123499	0.0198781	VEGFA	hsa-miR-29c-3p	0.0126999	0.0190498	PTEN
				hsa-miR-29a-3p	0.0131999	0.0207898	MYC	hsa-miR-410-3p	0.0124999	0.0198781	VEGFA	hsa-miR-29b-3p	0.0130499	0.019165	PTEN
				hsa-miR-125a-5p	0.0133999	0.0208443	MYC	hsa-miR-503-5p	0.0125499	0.0198781	VEGFA	hsa-miR-18a-5p	0.0130999	0.019165	PTEN
				hsa-miR-4510	0.0150999	0.0229986	MYC	hsa-miR-646	0.0125499	0.0198781	VEGFA	hsa-miR-29a-3p	0.0131999	0.019165	PTEN
				hsa-miR-196a-5p	0.0151499	0.0229986	MYC	hsa-miR-3662	0.0126499	0.0198781	VEGFA	hsa-miR-377-3p	0.0132499	0.019165	PTEN
				hsa-miR-125a-3p	0.0154999	0.0232498	MYC	hsa-miR-4789-5p	0.0126499	0.0198781	VEGFA	hsa-miR-181c-5p	0.0144999	0.0202152	PTEN
				hsa-let-7i-5p	0.0166999	0.0245555	MYC	hsa-miR-29c-3p	0.0126999	0.0198781	VEGFA	hsa-miR-548h-3p	0.0145499	0.0202152	PTEN
				hsa-miR-324-3p	0.0168999	0.0245555	MYC	hsa-miR-29b-3p	0.0130499	0.0202063	VEGFA	hsa-miR-548z	0.0145499	0.0202152	PTEN
				hsa-let-7g-5p	0.0170499	0.0245555	MYC	hsa-miR-29a-3p	0.0131999	0.0202211	VEGFA	hsa-miR-548bb-3p	0.0145499	0.0202152	PTEN
				hsa-miR-423-5p	0.0171499	0.0245555	MYC	hsa-miR-125a-5p	0.0133999	0.0203114	VEGFA	hsa-miR-548ac	0.0145999	0.0202152	PTEN
				hsa-miR-185-5p	0.0179499	0.0254122	MYC	hsa-miR-374a-5p	0.0140999	0.0211498	VEGFA	hsa-miR-548d-3p	0.0147499	0.0202498	PTEN
				hsa-miR-30d-5p	0.0183999	0.0257598	MYC	hsa-miR-5193	0.0142499	0.0211545	VEGFA	hsa-miR-107	0.0149999	0.02042	PTEN
				hsa-miR-222-3p	0.0196999	0.0265924	MYC	hsa-miR-5692a	0.0143999	0.021159	VEGFA	hsa-miR-23b-3p	0.0160999	0.0213785	PTEN
				hsa-let-7d-5p	0.0196999	0.0265924	MYC	hsa-miR-107	0.0149999	0.021818	VEGFA	hsa-miR-10b-5p	0.0160999	0.0213785	PTEN
				hsa-let-7f-5p	0.0198499	0.0265924	MYC	hsa-miR-203a-3p	0.0153499	0.0220988	VEGFA	hsa-miR-519a-3p	0.0174499	0.0228627	PTEN
				hsa-miR-130a-3p	0.0198999	0.0265924	MYC	hsa-miR-125a-3p	0.0154999	0.0220988	VEGFA	hsa-miR-519c-3p	0.0174999	0.0228627	PTEN
				hsa-miR-4668-5p	0.0200499	0.0265924	MYC	hsa-miR-3163	0.0170999	0.024141	VEGFA	hsa-miR-221-3p	0.0183999	0.0238462	PTEN
				hsa-miR-744-5p	0.0217498	0.0285467	MYC	hsa-miR-9-5p	0.0175499	0.0245357	VEGFA	hsa-miR-181b-5p	0.0186999	0.0239171	PTEN
				hsa-miR-26a-5p	0.0228498	0.0296812	MYC	hsa-miR-185-5p	0.0179499	0.0248537	VEGFA	hsa-miR-301b-3p	0.0187499	0.0239171	PTEN
				hsa-miR-375	0.0237498	0.0305355	MYC	hsa-miR-660-3p	0.0187999	0.0255394	VEGFA	hsa-miR-222-3p	0.0196999	0.0244225	PTEN
				hsa-let-7c-5p	0.0257998	0.0324354	MYC	hsa-miR-101-3p	0.0196499	0.0264447	VEGFA	hsa-miR-301a-3p	0.0197499	0.0244225	PTEN
				hsa-miR-25-3p	0.0258498	0.0324354	MYC	hsa-miR-520g-3p	0.0201999	0.0266398	VEGFA	hsa-miR-3652	0.0198499	0.0244225	PTEN
				hsa-miR-30c-5p	0.0259998	0.0324354	MYC	hsa-miR-520h	0.0203499	0.0266398	VEGFA	hsa-miR-4430	0.0198499	0.0244225	PTEN
				hsa-miR-373-3p	0.0265498	0.0327969	MYC	hsa-miR-3941	0.0214498	0.0274618	VEGFA	hsa-miR-130a-3p	0.0198999	0.0244225	PTEN
				hsa-miR-6086	0.0272498	0.0333347	MYC	hsa-miR-6838-5p	0.0215498	0.0274618	VEGFA	hsa-miR-103a-3p	0.0225998	0.0271198	PTEN
				hsa-miR-377-5p	0.0284498	0.0341998	MYC	hsa-miR-497-5p	0.0229998	0.0286136	VEGFA	hsa-miR-26a-5p	0.0228498	0.0272182	PTEN
				hsa-miR-19a-3p	0.0284998	0.0341998	MYC	hsa-miR-302d-3p	0.0229998	0.0286136	VEGFA	hsa-miR-10a-5p	0.0231498	0.0272933	PTEN
				hsa-miR-7-5p	0.0288498	0.0342932	MYC	hsa-miR-372-3p	0.0230498	0.0286136	VEGFA	hsa-miR-302a-3p	0.0232498	0.0272933	PTEN
				hsa-miR-320a	0.0291998	0.0343848	MYC	hsa-miR-424-5p	0.0235498	0.0289844	VEGFA	hsa-miR-1273g-3p	0.0252998	0.0293912	PTEN
				hsa-miR-21-5p	0.0305498	0.0353723	MYC	hsa-miR-603	0.0253998	0.0307359	VEGFA	hsa-miR-603	0.0253998	0.0293912	PTEN
				hsa-let-7e-5p	0.0305998	0.0353723	MYC	hsa-miR-373-3p	0.0265498	0.0309886	VEGFA	hsa-miR-25-3p	0.0258498	0.0296998	PTEN
				hsa-let-7a-5p	0.0319498	0.0365971	MYC	hsa-miR-150-5p	0.0266998	0.0309886	VEGFA	hsa-miR-128-3p	0.0263498	0.0300611	PTEN
				hsa-miR-92b-3p	0.0354498	0.0399935	MYC	hsa-miR-362-3p	0.0267998	0.0309886	VEGFA	hsa-miR-181a-5p	0.0275998	0.0312669	PTEN
				hsa-miR-940	0.0355498	0.0399935	MYC	hsa-miR-329-3p	0.0268998	0.0309886	VEGFA	hsa-miR-32-5p	0.0282498	0.0316786	PTEN
				hsa-miR-34a-5p	0.0367498	0.0409777	MYC	hsa-miR-181a-5p	0.0275998	0.0315427	VEGFA	hsa-miR-19a-3p	0.0284998	0.0316786	PTEN
				hsa-miR-186-5p	0.0374498	0.0413919	MYC	hsa-miR-320a	0.0291998	0.0328498	VEGFA	hsa-miR-130b-3p	0.0285498	0.0316786	PTEN
				hsa-miR-455-3p	0.0390498	0.0426334	MYC	hsa-miR-21-5p	0.0305498	0.0341021	VEGFA	hsa-miR-320a	0.0291998	0.0321794	PTEN
				hsa-miR-98-5p	0.0392498	0.0426334	MYC	hsa-miR-1277-5p	0.0311998	0.0345598	VEGFA	hsa-miR-21-5p	0.0305498	0.0334397	PTEN
				hsa-miR-1827	0.0416998	0.0449075	MYC	hsa-miR-195-5p	0.0319498	0.0351204	VEGFA	hsa-miR-92b-3p	0.0354498	0.0383005	PTEN
				hsa-miR-24-3p	0.0426998	0.0455947	MYC	hsa-miR-106a-5p	0.0356998	0.0387607	VEGFA	hsa-miR-19b-3p	0.0356498	0.0383005	PTEN
				hsa-miR-155-5p	0.0451498	0.0478057	MYC	hsa-miR-15a-5p	0.0357998	0.0387607	VEGFA	hsa-miR-106a-5p	0.0356998	0.0383005	PTEN
								hsa-miR-34a-5p	0.0367498	0.0394923	VEGFA	hsa-miR-193b-3p	0.0425998	0.0454024	PTEN
								hsa-miR-186-5p	0.0374498	0.0399465	VEGFA	hsa-miR-8485	0.0436998	0.0462704	PTEN
								hsa-miR-15b-5p	0.0379498	0.0401821	VEGFA	hsa-miR-155-5p	0.0451498	0.0473456	PTEN
								hsa-miR-8485	0.0436998	0.0459326	VEGFA	hsa-miR-519d-3p	0.0452998	0.0473456	PTEN
								hsa-miR-20b-5p	0.0458498	0.0476545	VEGFA	hsa-miR-20b-5p	0.0458498	0.0476132	PTEN
								hsa-miR-1-3p	0.0459998	0.0476545	VEGFA
