# Supplementary figures and images for: Identification of Potential Key Genes in Prostate Cancer with Gene Expression, Pivotal Pathways and Regulatory Networks Analysis Using Integrated Bioinformatics Methods
Source: MDPI journal article supplement (doi:10.3390/genes13040655), 2022-04-07

Raw Value

GSE32571

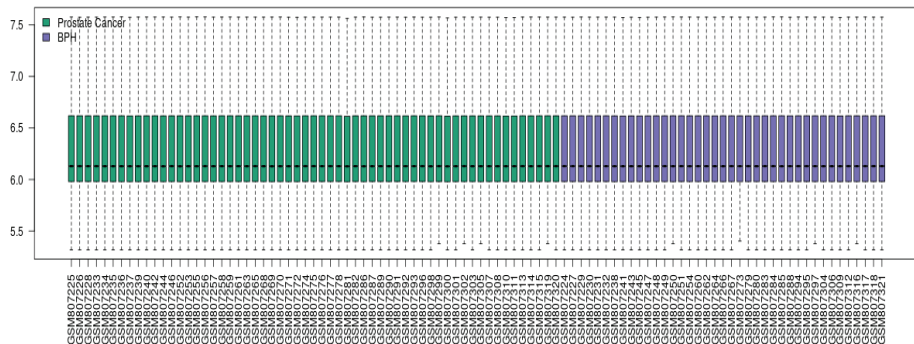

GSE32571

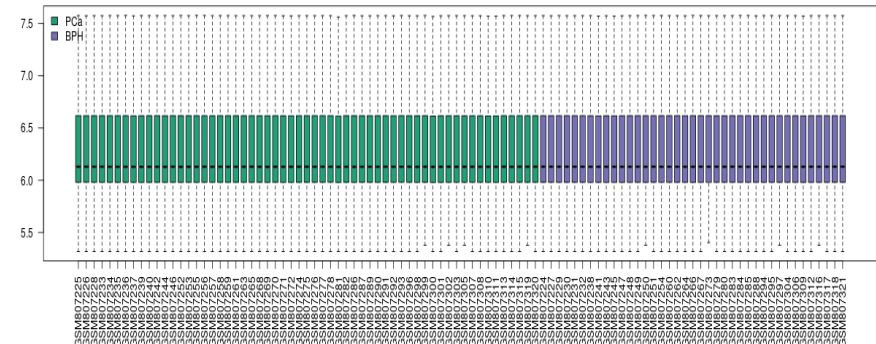

GSE46602

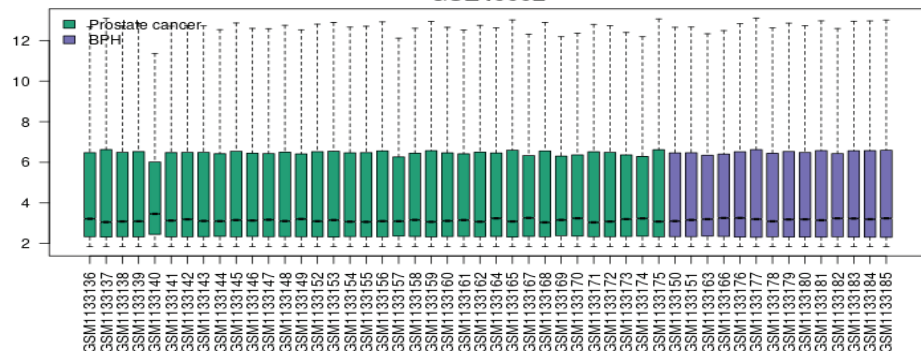

GSE46602

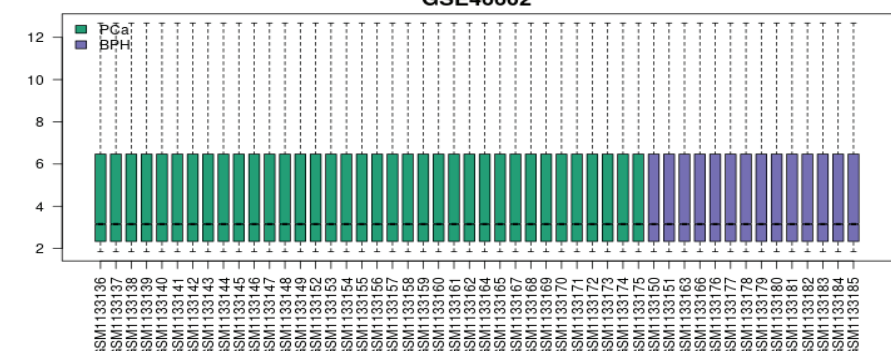

GSE55945

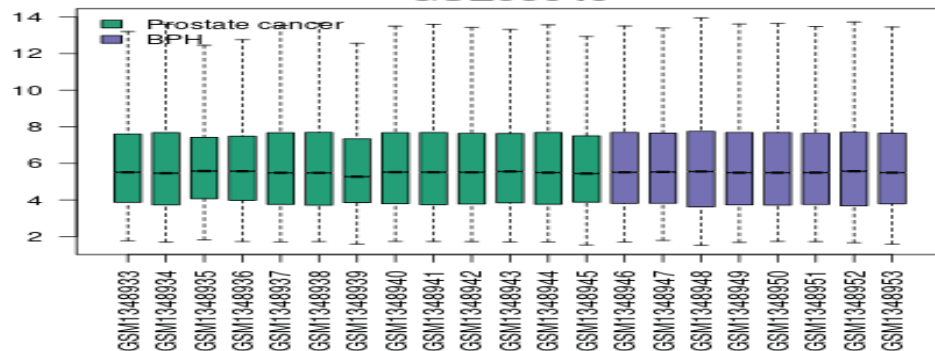

GSE55945

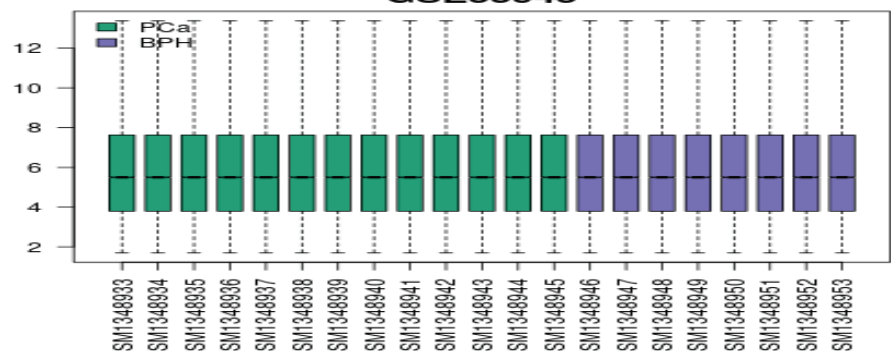

GSE104749

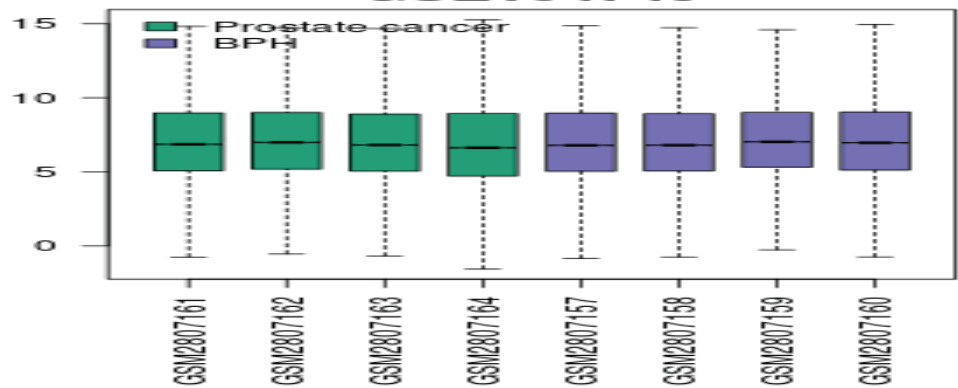

GSE104749

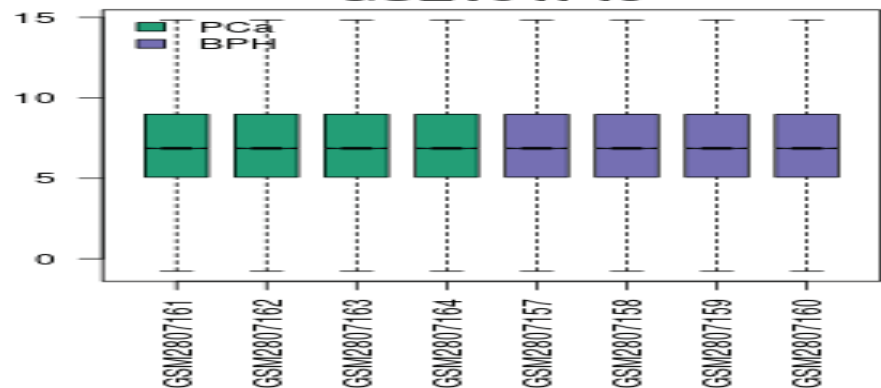

Normalised Value

Supplement: s1 [file Supplementary file S 2.pdf › Supplimentary file/Supplementary file S 2.pdf]

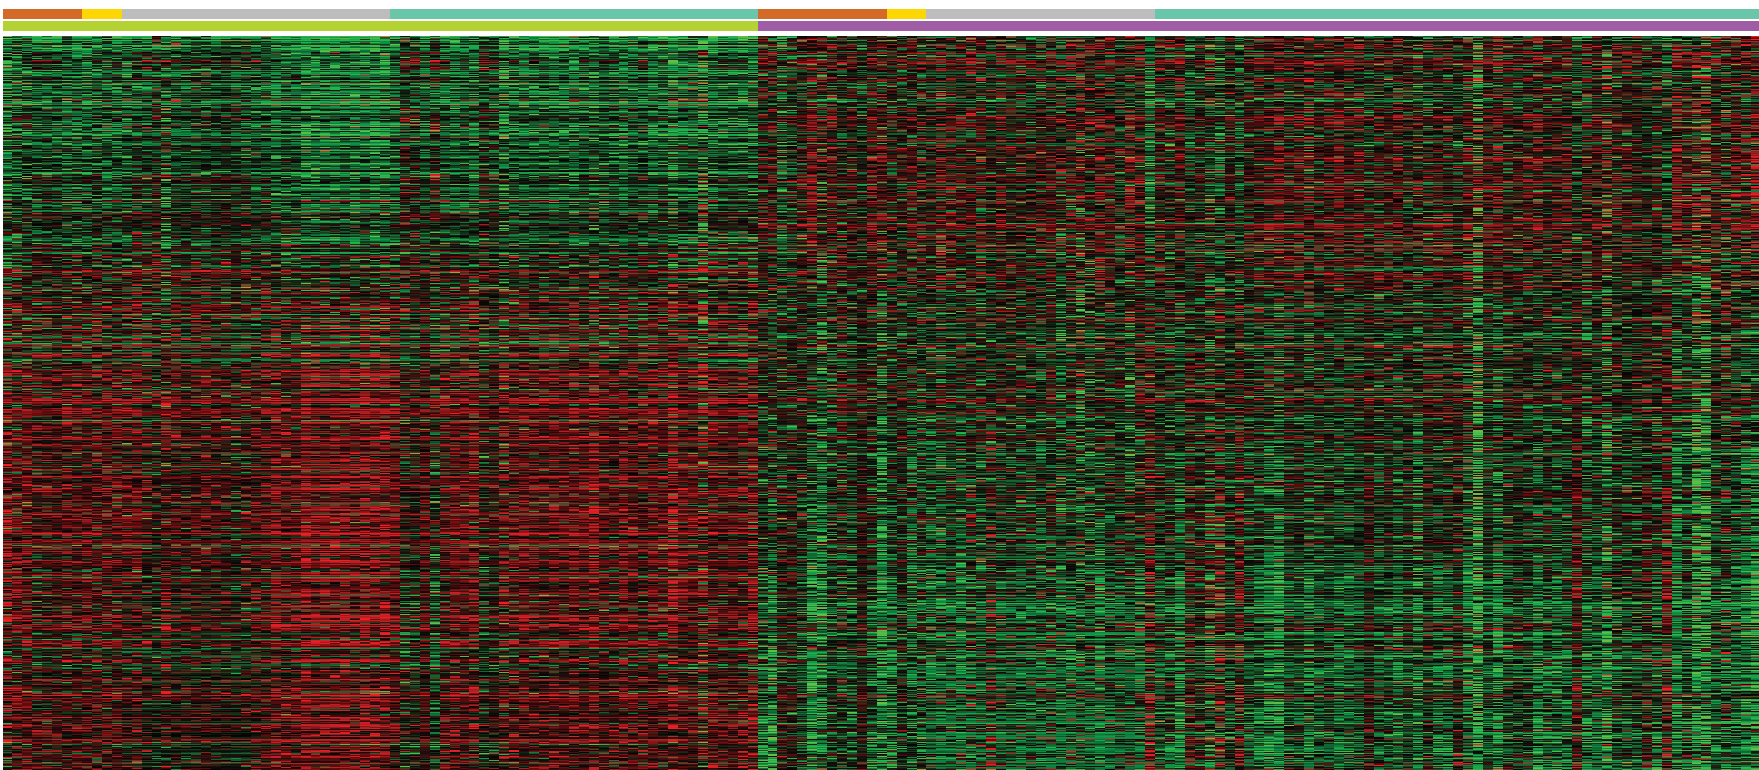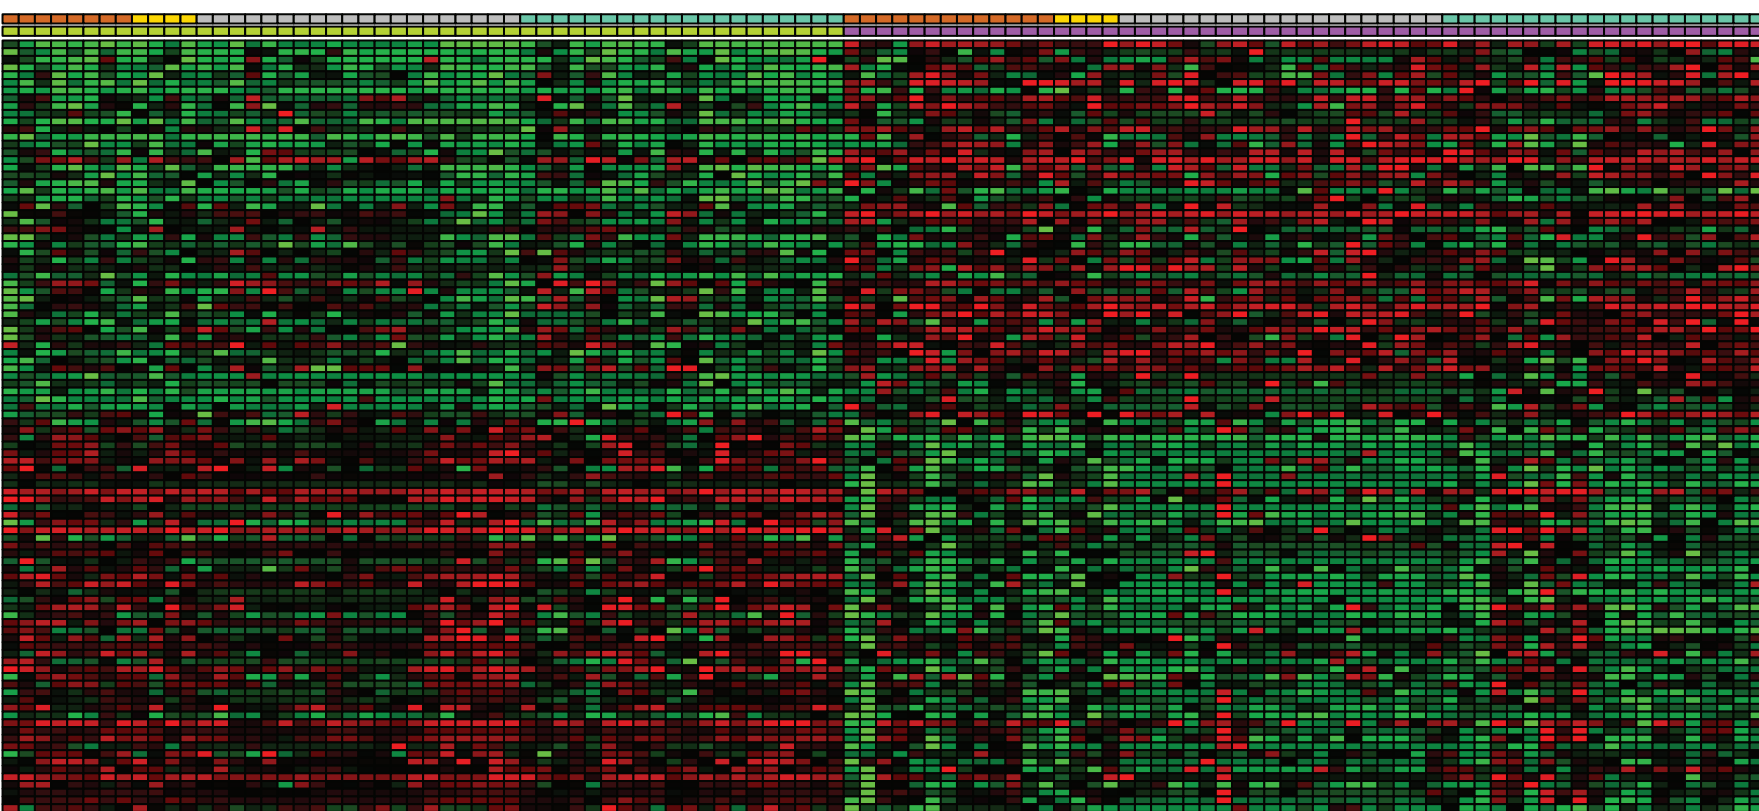

Supplement: s1 [file Supplementary file S 3.pdf › Supplimentary file/Supplementary file S 3.pdf]
